# Supplementary material
Source: publisher figshare collection journal article supplement (https://acs.figshare.com/ndownloader/files/21005802)
Supplement: Supplementary file 1 [file 21005802]

## Sheet: quantified_psites
supplemental_table_02
id_supplemental_table_02	sample_type	quantification_strategy	time_point	mean_ratio	mean_intensity_control	cv_control	mean_intensity_cetuximab	cv_cetuximab	p_value	q_value	amino_acid	position	multiplicity	sequence_window	leading_proteins	protein	gene_names	protein_names
1	psites	tmt	0	0.955999	0.984106	0.0861013	0.940804	0.0340318	0.575685	0.936012	S	953	___1	LSHIPLKDPLLFKSASDTNLQKGISFMDYLS	A0JNW5	A0JNW5	UHRF1BP1L	UHRF1-binding protein 1-like
2	psites	tmt	0	0.683607	1.17141	0.220272	0.800786	0.0197497	0.144607	0.834648	S	375	___1	GLEGPEVAGRERGDESPLGAEGAKTGGGEET	A6NDB9	A6NDB9	PALM3	Paralemmin-3
3	psites	tmt	0	0.670574	1.34781	0.333019	0.903805	0.195896	0.160151	0.834648	S	189	___1	PGAAGDSSEANGPCPSPIPTPEQGLSQRAVP	A6NDB9	A6NDB9	PALM3	Paralemmin-3
4	psites	tmt	0	1.07482	0.931141	0.0980258	1.00081	0.121314	0.474075	0.90494	S	402	___1	VVMAEEEDEGTDRPGSPA_____________	A6NKF1	A6NKF1	SAC3D1	SAC3 domain-containing protein 1
5	psites	tmt	0	1.08614	1.033	0.114628	1.12199	0.0496882	0.215756	0.834648	S	892	___1	SSKPSSFTEKVVYAFSPKIGRKLSKSPSMSI	A7KAX9	A7KAX9	ARHGAP32	Rho GTPase-activating protein 32
6	psites	tmt	0	0.935251	1.11584	0.0989847	1.04359	0.0375812	0.277456	0.855969	S	175	___1	QLATLEAGPGAAGAGSE______________	C9JI98	C9JI98	TMEM238	Transmembrane protein 238
7	psites	tmt	0	1.06965	1.05964	0.0919001	1.13345	0.274083	0.743305	0.98231	S	110	___1	SGKAYKTTWGDGGENSPCNVVSKQPGPVTNG	O00161	O00161	SNAP23	Synaptosomal-associated protein 23
8	psites	tmt	0	1.32555	0.892742	0.122784	1.18337	0.167195	0.0807867	0.834648	S	15	___1	_MSAARESHPHGVKRSASPDDDLGSSNWEAA	O00193	O00193	SMAP	Small acidic protein
9	psites	tmt	0	1.14584	0.902662	0.110833	1.03431	0.108746	0.134286	0.834648	S	17	___1	SAARESHPHGVKRSASPDDDLGSSNWEAADL	O00193	O00193	SMAP	Small acidic protein
10	psites	tmt	0	0.742437	1.04363	0.143611	0.774831	0.0755598	0.125061	0.834648	S	276	___1	KEGDELEDNGKNFYESDDDQKEKTDKKKKPY	O00203	O00203	AP3B1	AP-3 complex subunit beta-1
11	psites	tmt	0	1.07177	0.981803	0.068723	1.05227	0.074623	0.222937	0.835963	S	181	___1	HVGKLLKEGEEPTVYSDEEEPKDESARKND_	O00264	O00264	PGRMC1	Membrane-associated progesterone receptor component 1
12	psites	tmt	0	0.894977	1.13253	0.116244	1.01358	0.198046	0.353409	0.874972	S	57	___1	LYKIVRGDQPAASGDSDDDEPPPLPRLKRRD	O00264	O00264	PGRMC1	Membrane-associated progesterone receptor component 1
13	psites	tmt	0	1.13744	0.81888	0.19607	0.93143	0.0939891	0.322132	0.858718	S	666	___1	PRDVTNFTVGGFAPMSPRISSPMHPSAGGQR	O00267	O00267	SUPT5H	Transcription elongation factor SPT5
14	psites	tmt	0	0.982331	0.911701	0.00930511	0.895593	0.0469857	0.642241	0.953702	S	315	___1	TQSLHSLRSISASKASPPGDLQNPKRARQDP	O00273	O00273	DFFA	DNA fragmentation factor subunit alpha
15	psites	tmt	0	1.00088	1.02644	0.0215526	1.02734	0.0608077	0.998971	1	S	470	___1	EPREHGHSYSNRKYESDEDSLGSSGRVCVEK	O00418	O00418	EEF2K	Eukaryotic elongation factor 2 kinase
16	psites	tmt	0	1.25634	1.00582	0.105073	1.26365	0.189445	0.155034	0.834648	S	259	___1	TDLEITDSKVSNLQVSPKSEDISKFDWLDLD	O00443	O00443	PIK3C2A	Phosphatidylinositol 4-phosphate 3-kinase C2 domain-containing subunit alpha
17	psites	tmt	0	1.30091	0.821116	0.208397	1.0682	0.0505453	0.215236	0.834648	S	296	___1	VKAQPSDNAPAKGNKSPSPPDGSPAATPEIR	O00499	O00499	BIN1	Myc box-dependent-interacting protein 1
18	psites	tmt	0	0.974215	0.987893	0.131119	0.96242	0.0510611	0.807436	0.986664	S	298	___1	AQPSDNAPAKGNKSPSPPDGSPAATPEIRVN	O00499	O00499	BIN1	Myc box-dependent-interacting protein 1
19	psites	tmt	0	1.4358	0.811124	0.213877	1.16461	0.365764	0.38293	0.879147	S	56	___1	RDEHLLKKRNVPQEESLEDSDVDADFKAQNV	O00505	O00505	KPNA3	Importin subunit alpha-4
20	psites	tmt	0	1.09473	0.972619	0.105244	1.06476	0.21808	0.544437	0.936012	S	60	___1	LLKKRNVPQEESLEDSDVDADFKAQNVTLEA	O00505	O00505	KPNA3	Importin subunit alpha-4
21	psites	tmt	0	1.02818	1.15676	0.125503	1.18936	0.473722	0.875168	0.986664	S	687	___1	GNNPIFPRIPVEGPLSPSRGDFPKGIPPQMG	O00512	O00512	BCL9	B-cell CLL/lymphoma 9 protein
22	psites	tmt	0	1.06585	0.962835	0.185199	1.02624	0.182181	0.685997	0.968007	S	291	___1	RESPGVENKLIPSVGSPASSTPLPPDGTGPN	O00512	O00512	BCL9	B-cell CLL/lymphoma 9 protein
23	psites	tmt	0	1.02471	0.86416	0.286563	0.885518	0.163279	0.884886	0.986664	S	301	___1	ASEQPLAQEPPASGGSPATTKEQRGRALPGK	O00515	O00515	LAD1	Ladinin-1
24	psites	tmt	0	1.1108	1.00322	0.0994144	1.11438	0.0559035	0.112514	0.834648	S	394	___1	KPKKENSETTLTRSASMKLPDNTVKLGEKLE	O00515	O00515	LAD1	Ladinin-1
25	psites	tmt	0	1.14819	0.87426	0.0407372	1.00382	0.00311456	0.0408254	0.834648	S	570	___1	GSKKKRKFSKEEPVSSGPEEAVGKSSSKKKK	O00567	O00567	NOP56	Nucleolar protein 56
26	psites	tmt	0	1.14651	0.910176	0.178751	1.04353	0.114472	0.223643	0.835963	S	520	___1	KPKKKKSFSKEELMSSDLEETAGSTSIPKRK	O00567	O00567	NOP56	Nucleolar protein 56
27	psites	tmt	0	1.177	0.852825	0.145896	1.00378	0.206568	0.473543	0.90494	S	696	___1	FSPHTSPHLPGIRGPSPSPVGSPASVAQSRS	O14497	O14497	ARID1A	AT-rich interactive domain-containing protein 1A
28	psites	tmt	0	1.1573	0.918974	0.106916	1.06353	0.152511	0.272811	0.855969	S	1184	___1	PHSQIPPLPGMSRSNSVGIQDAFNDGSDSTF	O14497	O14497	ARID1A	AT-rich interactive domain-containing protein 1A
29	psites	tmt	0	1.22199	0.995437	0.041423	1.21641	0.0399762	0.0388499	0.834648	S	706	___1	LPDGHMPAMRMDRGVSMPNMLEPKIFPYEML	O14639	O14639	ABLIM1	Actin-binding LIM protein 1
30	psites	tmt	0	1.09448	0.920487	0.0585567	1.00746	0.0821578	0.336936	0.868922	S	452	___1	EGYQDVRDRMIHRSTSQGSINSPVYSRHSYT	O14639	O14639	ABLIM1	Actin-binding LIM protein 1
31	psites	tmt	0	1.23438	0.903535	0.100685	1.1153	0.124912	0.207163	0.834648	S	431	___1	DKQERQSLGESPRTLSPTPSAEGYQDVRDRM	O14639	O14639	ABLIM1	Actin-binding LIM protein 1
32	psites	tmt	0	0.953726	1.15843	0.0424118	1.10482	0.125398	0.459893	0.902495	S	119	___1	EKTTTVKFNRRKVMDSDEDDDY_________	O14737	O14737	PDCD5	Programmed cell death protein 5
33	psites	tmt	0	0.83846	1.16521	0.0812467	0.976984	0.0058463	0.0940005	0.834648	S	280	___1	QKENSREALAEAALESPRPALVRSASSDTSE	O14745	O14745	SLC9A3R1	Na(+)/H(+) exchange regulatory cofactor NHE-RF1
34	psites	tmt	0	0.924303	0.980236	0.132223	0.906035	0.00210089	0.511119	0.923777	S	804	___1	KAEADKIYSFTDNAPSPSIGGSSRLENTTPT	O15014	O15014	ZNF609	Zinc finger protein 609
35	psites	tmt	0	1.34141	0.854387	0.081478	1.14609	0.110033	0.0193237	0.812212	S	1905	___1	WDRADSGPTQPPLSLSPAPETKRPGQAAKKE	O15027	O15027	SEC16A	Protein transport protein Sec16A
36	psites	tmt	0	1.014	1.06159	0.032581	1.07646	0.123414	0.894322	0.98915	S	891	___1	LERAQQELVPPQQQASPPQLPKAMFSELSNP	O15027	O15027	SEC16A	Protein transport protein Sec16A
37	psites	tmt	0	0.99279	0.922224	0.0348027	0.915575	0.241311	0.861166	0.986664	S	391	___1	PEDEASGSFFKQIDSSPVGGETDETTVSQNY	O15027	O15027	SEC16A	Protein transport protein Sec16A
38	psites	tmt	0	0.869651	1.02587	0.0836247	0.892147	0.349137	0.58025	0.936474	S	67	___1	KHNYRNESARESLCDSPHQNLSRPLLENKLK	O15042	O15042	U2SURP	U2 snRNP-associated SURP motif-containing protein
39	psites	tmt	0	1.20078	0.858796	0.0326055	1.03122	0.0407406	0.00374671	0.723135	S	148	___1	EEKPDTKSTVTGERQSGDGQESTEPVENKVG	O15234	O15234	CASC3	Protein CASC3
40	psites	tmt	0	1.01788	0.983985	0.0737326	1.00158	0.0900995	0.777879	0.986664	S	265	___1	PDDIKPRRIRKPRYGSPPQRDPNWNGERLNK	O15234	O15234	CASC3	Protein CASC3
41	psites	tmt	0	1.0661	1.05214	0.207988	1.12168	0.132005	0.65237	0.958951	S	214	___1	TAKVLSPESKQARANSFVGTAQYVSPELLTE	Q6A1A2	Q6A1A2	PDPK2P;PDPK1	Putative 3-phosphoinositide-dependent protein kinase 2;3-phosphoinositide-dependent protein kinase 1
42	psites	tmt	0	0.940975	0.994482	0.0922084	0.935783	0.105758	0.418373	0.896798	S	253	___1	EGRYGVYEDENYEVGSDDEEIPFKCFICRQS	O15541	O15541	RNF113A	RING finger protein 113A
43	psites	tmt	0	0.933667	1.10764	0.248764	1.03417	0.12437	0.740861	0.98231	S	1255	___1	CHLPAVSKVLPAFRESPSGRLMRQDPVVHLS	O43166	O43166	SIPA1L1	Signal-induced proliferation-associated 1-like protein 1
44	psites	tmt	0	1.05901	0.991989	0.0749665	1.05053	0.159385	0.5667	0.936012	S	194	___1	KDFQDYMEPEEGCQGSPQRRGPLTSGSDEEN	O43237	O43237	DYNC1LI2	Cytoplasmic dynein 1 light intermediate chain 2
45	psites	tmt	0	1.0037	1.18018	0.0435131	1.18454	0.14864	0.975173	1	S	1228	___1	MEATASSRARISRSISLGDSEGPIVATLAQP	O43379	O43379	WDR62	WD repeat-containing protein 62
46	psites	tmt	0	0.933868	1.00001	0.137449	0.933881	0.191804	0.614579	0.948	S	113	___1	GLEEKIKQHLENDPGSNEDTDIPKGYMDLMP	O43396	O43396	TXNL1	Thioredoxin-like protein 1
47	psites	tmt	0	0.953738	1.08691	0.122184	1.03663	0.132432	0.62691	0.948	S	166	___1	ISRKLGDMRNSATFKSFEDRVGTIKSKVVGD	O43399	O43399	TPD52L2	Tumor protein D54
48	psites	tmt	0	0.986268	1.04012	0.0255475	1.02583	0.227024	0.884821	0.986664	S	1156	___1	LPSATARPNTFMRGGSSKDLLDNQSQEEQRR	O43432	O43432	EIF4G3	Eukaryotic translation initiation factor 4 gamma 3
49	psites	tmt	0	0.663484	1.16339	0.258383	0.771894	0.398348	0.333178	0.866244	S	499	___1	LWKVCVEHHTFYRLVSPEQPPKAKFLTLGSK	O43491	O43491	EPB41L2	Band 4.1-like protein 2
50	psites	tmt	0	1.0849	1.08191	0.18766	1.17376	0.174996	0.52821	0.930181	S	87	___1	RGISRFIPPWLKKQKSYTLVVAKDGGDKKEP	O43491	O43491	EPB41L2	Band 4.1-like protein 2
51	psites	tmt	0	0.883062	0.982615	0.109022	0.86771	0.276208	0.5755	0.936012	S	169	___1	LDRYFEADPPGQVAASPDPTT__________	O43598	O43598	DNPH1	2'-deoxynucleoside 5'-phosphate N-hydrolase 1
52	psites	tmt	0	0.968157	0.996572	0.0786358	0.964838	0.138866	0.782499	0.986664	S	656	___1	QSKQQSNEHLRRQFASQANVVGPWIQTKMEE	O43707	O43707	ACTN4	Alpha-actinin-4
53	psites	tmt	0	0.915991	0.968435	0.0528089	0.887078	0.0856047	0.338185	0.869558	S	109	___1	GDHIPTPQDLPQRKSSLVTSKLAGGQVE___	O43768	O43768	ENSA	Alpha-endosulfine
54	psites	tmt	0	1.01513	1.03597	0.0776636	1.05164	0.090072	0.815712	0.986664	S	245	___1	VLDNFKFLESAAADFSDEDEDDDVDGREKSV	O43815	O43815	STRN	Striatin
55	psites	tmt	0	0.978734	0.88974	0.234655	0.870818	0.145541	0.948079	0.996956	S	328	___1	EPDTKLARVDSEGDFSENDDAAGDFRSGDEE	O43823	O43823	AKAP8	A-kinase anchor protein 8
56	psites	tmt	0	1.04226	0.96795	0.102195	1.00885	0.162379	0.752541	0.983706	S	94	___1	ARLGADESEEEGRRGSLSNAGDPEIVKSPSD	O43847	O43847	NRD1	Nardilysin
57	psites	tmt	0	0.874662	0.991057	0.199073	0.86684	0.23043	0.591526	0.941922	S	1211	___1	LRADISIIKGRYRSQSGEDESMNQPGPIKTR	O43933	O43933	PEX1	Peroxisome biogenesis factor 1
58	psites	tmt	0	1.0856	0.699804	0.0504858	0.759708	0.101235	0.28232	0.855969	S	96	___1	LEQTQKSKPVFSESLSD______________	O60220	O60220	TIMM8A	Mitochondrial import inner membrane translocase subunit Tim8 A
59	psites	tmt	0	0.818971	1.17404	0.106451	0.961506	0.14336	0.131581	0.834648	S	66	___1	AGPADAEMEEIFDDASPGKQKEIQEPDPTYE	O60264	O60264	SMARCA5	SWI/SNF-related matrix-associated actin-dependent regulator of chromatin subfamily A member 5
60	psites	tmt	0	0.92781	0.97977	0.161388	0.90904	0.199313	0.573879	0.936012	S	166	___1	LPPPPPQAPPEEENESEPEEPSGVEGAAFQS	O60341	O60341	KDM1A	Lysine-specific histone demethylase 1A
61	psites	tmt	0	1.17346	1.0069	0.321075	1.18156	0.0924954	0.523111	0.930181	S	570	___1	KLDILKNKAKRSLTSSLENIFSRGANRMRGR	O60343	O60343	TBC1D4	TBC1 domain family member 4
62	psites	tmt	0	1.05667	1.05992	0.0708012	1.11998	0.0854284	0.446048	0.902495	S	666	___1	KRKLNLQDGRAQGVRSPLLRQSSSEQCSNLS	O60343	O60343	TBC1D4	TBC1 domain family member 4
63	psites	tmt	0	1.02819	1.01115	0.0692356	1.03966	0.0579796	0.622743	0.948	S	530	___1	EPRLRLCDDGPQLPTSPRLTAAARSARHPSS	O60504	O60504	SORBS3	Vinexin
64	psites	tmt	0	1.06533	1.07652	0.103256	1.14685	0.101391	0.599395	0.941922	S	230	___1	RHYEDGYPGGSDNYGSLSRVTRIEERYRPSM	O60716	O60716	CTNND1	Catenin delta-1
65	psites	tmt	0	0.998714	0.956308	0.0317268	0.955078	0.0707009	0.944916	0.996956	S	494	___1	AKAGLESGAEPGDGDSDTTKKKKKKKKAKEV	O60832	O60832	DKC1	H/ACA ribonucleoprotein complex subunit 4
66	psites	tmt	0	0.989809	1.00445	0.0500297	0.994209	0.0347551	0.762794	0.98551	S	513	___1	KKKKKKKKAKEVELVSE______________	O60832	O60832	DKC1	H/ACA ribonucleoprotein complex subunit 4
67	psites	tmt	0	0.84561	1.14364	0.0299976	0.967073	0.0241952	0.000126014	0.266016	S	164	___1	KAKGKAQKSNKKWDGSEEDEDNSKKIKERSR	O60841	O60841	EIF5B	Eukaryotic translation initiation factor 5B
68	psites	tmt	0	1.32358	1.01166	0.130951	1.33901	0.335478	0.175273	0.834648	S	214	___1	GQKKNQKNKPGPNIESGNEDDDASFKIKTVA	O60841	O60841	EIF5B	Eukaryotic translation initiation factor 5B
69	psites	tmt	0	0.826881	1.04567	0.212823	0.864643	0.664711	0.626033	0.948	S	19	___1	ATVPVAAATAAEGEGSPPAVAAVAGPPAAAE	O75179	O75179	ANKRD17	Ankyrin repeat domain-containing protein 17
70	psites	tmt	0	1.07768	0.983169	0.184856	1.05954	0.446014	0.951113	0.997347	S	102	___1	VKEGQPSPADEKGNDSDGEGESDDPEKKKLQ	O75351	O75351	VPS4B	Vacuolar protein sorting-associated protein 4B
71	psites	tmt	0	0.956753	1.50181	0.175865	1.43687	0.504142	0.815545	0.986664	S	570	___1	KNLKRFFDGAKDVTGSPPAKQLKEMPSVFQN	O75362	O75362	ZNF217	Zinc finger protein 217
72	psites	tmt	0	1.13658	0.94205	0.110811	1.07072	0.143188	0.220961	0.835963	S	2184	___1	SQRGAEPAEQRNDARSPGSISYLPSFFTKLE	O75376	O75376	NCOR1	Nuclear receptor corepressor 1
73	psites	tmt	0	1.06397	1.03426	0.0920797	1.10042	0.127039	0.537282	0.935038	S	30	___1	TGSVKSERRNLLEDDSDEEEDFFLRGPSGPR	O75379	O75379	VAMP4	Vesicle-associated membrane protein 4
74	psites	tmt	0	1.3327	1.26583	0.281833	1.68698	0.425788	0.555639	0.936012	S	623	___1	LPDFLQRNPLPPILGSPTKAVPSFDFPKTPS	O75385	O75385	ULK1	Serine/threonine-protein kinase ULK1
75	psites	tmt	0	0.641792	1.13125	0.254774	0.726027	0.538152	0.369807	0.876797	S	131	___1	KNLIQSVRNRRKRKGSDDDGGDSPVQDIDTP	O75446	O75446	SAP30	Histone deacetylase complex subunit SAP30
76	psites	tmt	0	1.23567	1.02888	0.0673311	1.27136	0.130933	0.183865	0.834648	S	177	___1	AGVVTTATASVNLKVSPKRGRPAATEVKIPK	O75475	O75475	PSIP1	PC4 and SFRS1-interacting protein
77	psites	tmt	0	1.00402	1.00277	0.20678	1.0068	0.153525	0.965728	1	S	1490	___1	STKGTYFPAILNPPPSPATERSHYTMEFGYS	O75581	O75581	LRP6	Low-density lipoprotein receptor-related protein 6
78	psites	tmt	0	0.976985	1.02155	0.074945	0.99804	0.0710903	0.714628	0.972649	S	992	___1	DTLQELVNQSKAAPQSPSVPKKPGPPVLSSD	O75694	O75694	NUP155	Nuclear pore complex protein Nup155
79	psites	tmt	0	1.10056	0.973977	0.0391203	1.07192	0.00586907	0.0751848	0.834648	S	383	___1	GRPRQRSHILEDDENSVDISMLKTGSSLLKE	O75717	O75717	WDHD1	WD repeat and HMG-box DNA-binding protein 1
80	psites	tmt	0	0.833744	0.976478	0.477853	0.814133	0.238059	0.752205	0.983706	S	42	___1	TSELLKGIPLATGDTSPEPELLPGAPLPPPK	O75821	O75821	EIF3G	Eukaryotic translation initiation factor 3 subunit G
81	psites	tmt	0	0.946945	1.02468	0.0449705	0.970314	0.233591	0.552124	0.936012	S	340	___1	PQPSSPRQVKRAVVVSPKEENKAAEPPPPKI	O75909	O75909	CCNK	Cyclin-K
82	psites	tmt	0	1.04328	0.937844	0.121375	0.978435	0.105916	0.656866	0.958951	S	329	___1	QQPAQQPKKPSPQPSSPRQVKRAVVVSPKEE	O75909	O75909	CCNK	Cyclin-K
83	psites	tmt	0	1.06721	0.972549	0.0936624	1.03792	0.0550804	0.351951	0.874972	S	488	___1	EEPSAKRTCPSLSPTSPLNNKGILSLPHQAS	O75925	O75925	PIAS1	E3 SUMO-protein ligase PIAS1
84	psites	tmt	0	1.10976	0.994529	0.11025	1.10369	0.215974	0.503687	0.913915	S	361	___1	KKRGRGKAQVKATNESEDEIPQLVPIGKKTP	O76021	O76021	RSL1D1	Ribosomal L1 domain-containing protein 1
85	psites	tmt	0	1.51499	1.06728	0.355524	1.61692	0.403072	0.321436	0.858718	S	815	___1	APEKYTGEEDGAGGHSPAPPQTEECLRERPS	O94762	O94762	RECQL5	ATP-dependent DNA helicase Q5
86	psites	tmt	0	0.898725	0.987371	0.171671	0.887376	0.0450533	0.358166	0.874972	S	438	___1	QVAQEKQVAEQGGDLSPAANRSQKASQSRPN	O94804	O94804	STK10	Serine/threonine-protein kinase 10
87	psites	tmt	0	1.38937	0.798751	0.0996572	1.10976	0.0519235	0.00656931	0.723135	S	382	___1	SKPREIASLIRNKFGSADNIPNLKDSLEEGQ	O94876	O94876	TMCC1	Transmembrane and coiled-coil domains protein 1
88	psites	tmt	0	1.13658	0.955161	0.138151	1.08562	0.141054	0.251734	0.855001	S	288	___1	KKCARSESLIDASEDSQLEAAIRASLQETHF	O94888	O94888	UBXN7	UBX domain-containing protein 7
89	psites	tmt	0	1.23223	0.925149	0.19466	1.14	0.0487436	0.266604	0.855969	S	799	___1	DRLCRAQGEPVAGHESPKIPYEKQQLPKGRP	O94979	O94979	SEC31A	Protein transport protein Sec31A
90	psites	tmt	0	0.697763	1.42655	0.308877	0.995394	0.574523	0.316138	0.858718	S	112	___1	LPATKASPSSPGRQDSDEDDGPQRVEEVDQG	O95049	O95049	TJP3	Tight junction protein ZO-3
91	psites	tmt	0	1.60508	0.815952	0.491749	1.30967	0.613598	0.398747	0.888673	S	154	___1	SNAAPVAENVTNNEGSPPPPVKVSSEPPTQA	O95104	O95104	SCAF4	Splicing factor, arginine/serine-rich 15
92	psites	tmt	0	0.955739	0.910467	0.201375	0.870169	0.152028	0.778341	0.986664	S	120	___1	GFNERENVEYIEREESDGEYDEFGRKKKKYR	O95218	O95218	ZRANB2	Zinc finger Ran-binding domain-containing protein 2
93	psites	tmt	0	0.878152	1.08999	0.157155	0.95718	0.0184904	0.385351	0.880719	S	2226	___1	EGVVPPASGGGRVQNSPPVGRKTLPLTTAPE	O95359	O95359	TACC2	Transforming acidic coiled-coil-containing protein 2
94	psites	tmt	0	0.681867	1.19164	0.16903	0.812539	0.0386272	0.023699	0.812212	S	60	___1	VGSSEKLGRETEEQDSDSAEQGDPAGEGKEV	O95361	O95361	TRIM16	Tripartite motif-containing protein 16
95	psites	tmt	0	1.10456	1.00714	0.153524	1.11245	0.0291081	0.197877	0.834648	S	549	___1	QEKHFKDEDEDEDVASPDGLGRLNVAGAGGG	O95365	O95365	ZBTB7A	Zinc finger and BTB domain-containing protein 7A
96	psites	tmt	0	1.33406	0.936473	0.231782	1.24931	0.652094	0.600019	0.941922	S	215	___1	LQEELASGKLVEQANSPKHQWGEEEPNSQME	O95391	O95391	SLU7	Pre-mRNA-splicing factor SLU7
97	psites	tmt	0	0.969084	1.04939	0.416707	1.01694	0.154572	0.982483	1	S	64	___1	RSKQTKSTIGVMVTASHNPEEDNGVKLVDPL	O95394	O95394	PGM3	Phosphoacetylglucosamine mutase
98	psites	tmt	0	1.3289	0.717248	0.164046	0.953151	0.0334238	0.134264	0.834648	S	47	___1	LLAEQEPQPERLVPVSPLPPKAALSRDEILR	O95396	O95396	MOCS3	Adenylyltransferase and sulfurtransferase MOCS3;Molybdopterin-synthase adenylyltransferase;Molybdopterin-synthase sulfurtransferase
99	psites	tmt	0	0.872925	1.02612	0.270544	0.895729	0.203448	0.522567	0.930181	S	245	___1	FSFSGRDSSFTEVPRSPKHAHSSSLQQAASR	O95425	O95425	SVIL	Supervillin
100	psites	tmt	0	1.03016	0.915047	0.0921257	0.942641	0.138587	0.804001	0.986664	S	707	___1	LSVAAKRLLFREMEKSFDEQNVPKRRSRNTA	O95425	O95425	SVIL	Supervillin
101	psites	tmt	0	1.22842	0.844734	0.142197	1.03768	0.183661	0.345021	0.874972	S	557	___1	QCIPYTLQNHYYRNNSFTAPSTVGKRNLSPS	O95453	O95453	PARN	Poly(A)-specific ribonuclease PARN
102	psites	tmt	0	0.831557	1.15985	0.0911675	0.964483	0.0353079	0.118559	0.834648	S	207	___1	KAGYRVPRSYPKSNSSKEYV___________	O95471	O95471	CLDN7	Claudin-7
103	psites	tmt	0	0.969584	1.04674	0.0922076	1.0149	0.112734	0.786128	0.986664	S	25	___1	LPSALGSRKLGPRSLSCLSDLDGGVALEPRA	O95685	O95685	PPP1R3D	Protein phosphatase 1 regulatory subunit 3D
104	psites	tmt	0	0.885805	1.05849	0.205726	0.937619	0.0236815	0.320569	0.858718	S	339	___1	SSGRLHKTEDGGWEWSDDEFDEESEEGKAAI	O95747	O95747	OXSR1	Serine/threonine-protein kinase OSR1
105	psites	tmt	0	0.989065	0.833966	0.181419	0.824847	0.393315	0.793529	0.986664	S	427	___1	AEPAKTAQALSSGSGSQETKIPISLVLRLRN	O95747	O95747	OXSR1	Serine/threonine-protein kinase OSR1
106	psites	tmt	0	1.30664	1.06037	0.304056	1.38552	0.128553	0.349087	0.874972	S	996	___1	PSSPLLKKTPLALAGSPTPKNPEDKSPQLSL	O95785	O95785	WIZ	Protein Wiz
107	psites	tmt	0	1.20613	0.872203	0.119994	1.05199	0.167978	0.33624	0.868922	S	390	___1	KKPGDGRKVTFFEPGSGDENGTSNKEDEFRM	O95793	O95793	STAU1	Double-stranded RNA-binding protein Staufen homolog 1
108	psites	tmt	0	1.11614	0.935511	0.106325	1.04416	0.137642	0.27103	0.855969	S	233	___1	VPPYMIASKEAVREGSPANWKRKEKLPQVTR	O96019	O96019	ACTL6A	Actin-like protein 6A
109	psites	tmt	0	1.1177	1.03237	0.273383	1.15388	0.130583	0.423209	0.896798	S	21	___1	SRLQAKQQPQPSQTESPQEAQIIQAKKRKTT	O96020	O96020	CCNE2	G1/S-specific cyclin-E2
110	psites	tmt	0	0.847841	1.1908	0.0666305	1.0096	0.246817	0.297848	0.858718	S	695	___1	RRLLQERELVEPLTPSGEAPNQALLRILKET	P00533	P00533	EGFR	Epidermal growth factor receptor
111	psites	tmt	0	1.15664	1.10757	0.122838	1.28106	0.117795	0.143356	0.834648	S	1166	___1	FDSPAHWAQKGSHQISLDNPDYQQDFFPKEA	P00533	P00533	EGFR	Epidermal growth factor receptor
112	psites	tmt	0	1.07304	0.956141	0.055228	1.02598	0.135021	0.420055	0.896798	S	991	___1	QRYLVIQGDERMHLPSPTDSNFYRALMDEED	P00533	P00533	EGFR	Epidermal growth factor receptor
113	psites	tmt	0	0.884332	1.16574	0.228698	1.0309	0.105279	0.527435	0.930181	S	1064	___1	CIDRNGLQSCPIKEDSFLQRYSSDPTGALTE	P00533	P00533	EGFR	Epidermal growth factor receptor
114	psites	tmt	0	1.02038	0.974337	0.17445	0.994197	0.166545	0.874434	0.986664	S	1039	___1	FSSPSTSRTPLLSSLSATSNNSTVACIDRNG	P00533	P00533	EGFR	Epidermal growth factor receptor
115	psites	tmt	0	0.94799	1.04252	0.0232682	0.988301	0.073549	0.278161	0.855969	S	1045	___1	SRTPLLSSLSATSNNSTVACIDRNGLQSCPI	P00533	P00533	EGFR	Epidermal growth factor receptor
116	psites	tmt	0	0.938352	1.07126	0.0165829	1.00521	0.0931362	0.206094	0.834648	S	1204	___1	GSTAENAEYLRVAPQSSEFIGA_________	P00533	P00533	EGFR	Epidermal growth factor receptor
117	psites	tmt	0	1.02808	1.12102	0.110851	1.15249	0.106452	0.727874	0.977557	S	203	___1	FLMKKELNYFAKALESPERPFLAILGGAKVA	P00558	P00558	PGK1	Phosphoglycerate kinase 1
118	psites	tmt	0	0.992602	0.998483	0.0116889	0.991096	0.141266	0.839684	0.986664	S	390	___1	AYRKLLEGEEERLRLSPSPTSQRSRGRASSH	P02545	P02545	LMNA	Prelamin-A/C;Lamin-A/C
119	psites	tmt	0	0.970989	0.722111	0.287554	0.701162	0.250879	0.910152	0.990033	S	636	___1	TVTRSYRSVGGSGGGSFGDNLVTRSYLLGNS	P02545	P02545	LMNA	Prelamin-A/C;Lamin-A/C
120	psites	tmt	0	1.05345	1.02235	0.113471	1.077	0.156717	0.645155	0.954394	S	179	___1	SGLAEYLFDKHTLGDSDNES___________	P02794	P02794	FTH1	Ferritin heavy chain;Ferritin heavy chain, N-terminally processed
121	psites	tmt	0	1.0278	1.05472	0.108146	1.08404	0.187651	0.865047	0.986664	S	231	___1	VAARKLFAPQQILQCSPAN____________	P04183	P04183	TK1	Thymidine kinase, cytosolic
122	psites	tmt	0	1.02816	1.05729	0.159652	1.08706	0.102761	0.74136	0.98231	S	315	___1	PPGSTKRALPNNTSSSPQPKKKPLDGEYFTL	P04637	P04637	TP53	Cellular tumor antigen p53
123	psites	tmt	0	1.14185	1.00838	0.10542	1.15142	0.38034	0.72178	0.974845	S	392	___1	TSRHKKLMFKTEGPDSD______________	P04637	P04637	TP53	Cellular tumor antigen p53
124	psites	tmt	0	0.903805	1.01293	0.0893862	0.915494	0.108519	0.190911	0.834648	S	104	___1	AEEKKVEAKKEESEESDDDMGFGLFD_____	P05386	P05386	RPLP1	60S acidic ribosomal protein P1
125	psites	tmt	0	0.903805	1.01293	0.0893862	0.915494	0.108519	0.190911	0.834648	S	105	___1	AAEEKKDEKKEESEESDDDMGFGLFD_____	P05387	P05387	RPLP2	60S acidic ribosomal protein P2
126	psites	tmt	0	1.30998	0.838784	0.130022	1.09879	0.165494	0.0541951	0.834648	S	17	___1	RYVASYLLAALGGNSSPSAKDIKKILDSVGI	P05387	P05387	RPLP2	60S acidic ribosomal protein P2
127	psites	tmt	0	1.02543	0.913882	0.0295943	0.937126	0.0419702	0.452922	0.902495	S	366	___1	GKGKVQFQGKKTKFASDDEHDEHDENGATGP	P05455	P05455	SSB	Lupus La protein
128	psites	tmt	0	1.06155	0.943854	0.0819848	1.00194	0.263334	0.772261	0.986664	S	42	___1	RPVSSAASVYAGAGGSGSRISVSRSTSFRGG	P05783	P05783	KRT18	Keratin, type I cytoskeletal 18
129	psites	tmt	0	0.998187	0.976528	0.151286	0.974758	0.146559	0.989933	1	S	18	___1	FTTRSTFSTNYRSLGSVQAPSYGARPVSSAA	P05783	P05783	KRT18	Keratin, type I cytoskeletal 18
130	psites	tmt	0	0.936008	1.05527	0.0706962	0.987741	0.134367	0.477135	0.90494	S	420	___1	IQKTTTRRIVDGKVVSETNDTKVLRH_____	P05783	P05783	KRT18	Keratin, type I cytoskeletal 18
131	psites	tmt	0	1.15851	0.867791	0.366211	1.00534	0.11797	0.475978	0.90494	S	249	___1	LLKEPYKTAVIPINGSPRTPRRGQNRSARIA	P06400	P06400	RB1	Retinoblastoma-associated protein
132	psites	tmt	0	0.657293	1.23653	0.663415	0.812763	0.248812	0.472522	0.90494	S	125	___1	HISGQHLVAVEEDAESEDEEEEDVKLLSISG	P06748	P06748	NPM1	Nucleophosmin
133	psites	tmt	0	0.837908	1.12758	0.393357	0.944805	0.276897	0.599489	0.941922	S	434	___1	YIWEYSRLNLNNTVLSKRKLTWFVNEGLVDG	P07814	P07814	EPRS	Bifunctional glutamate/proline--tRNA ligase;Glutamate--tRNA ligase;Proline--tRNA ligase
134	psites	tmt	0	0.764177	1.15797	0.0861511	0.884897	0.205991	0.108268	0.834648	S	255	___1	EDKDDEEKPKIEDVGSDEEDDSGKDKKKKTK;ENKDDEEKPKIEDVGSDEEDDSGKDKKKKTK	P08238;Q58FF8	P08238	HSP90AB1;HSP90AB2P	Heat shock protein HSP 90-beta;Putative heat shock protein HSP 90-beta 2
135	psites	tmt	0	1.06978	1.04633	0.290178	1.11934	0.100976	0.629028	0.948483	S	6	___1	__________MGKSESQMDITDINTPKPKKK	P08473	P08473	MME	Neprilysin
136	psites	tmt	0	0.935408	1.02403	0.192925	0.957885	0.290089	0.656006	0.958951	S	113	___1	VDPDTKEMLKLLDFGSLSNLQVTQPTVGMNF	P08708	P08708	RPS17	40S ribosomal protein S17
137	psites	tmt	0	0.992879	1.13082	0.258309	1.12277	0.188513	0.988562	1	S	415	___1	YANAICQWERNKLQCSDTEQVEADLE_____	P08910	P08910	ABHD2	Abhydrolase domain-containing protein 2
138	psites	tmt	0	1.07408	1.29913	0.429363	1.39536	0.395308	0.817773	0.986664	S	170	___1	RLDCAQLKEKNQWQLSADDLKKLKPGLEKDF	P09543	P09543	CNP	2',3'-cyclic-nucleotide 3'-phosphodiesterase
139	psites	tmt	0	1.02547	0.962912	0.110576	0.987439	0.210765	0.910554	0.990033	S	6	___1	__________MSKSESPKEPEQLRKLFIGGL	P09651	P09651	HNRNPA1	Heterogeneous nuclear ribonucleoprotein A1;Heterogeneous nuclear ribonucleoprotein A1, N-terminally processed
140	psites	tmt	0	0.920383	1.04523	0.28988	0.962009	0.133754	0.799933	0.986664	S	782	___1	NLLDIEVAYSLLRGGSDDSSKDPIDVNYEKL	P09874	P09874	PARP1	Poly [ADP-ribose] polymerase 1
141	psites	tmt	0	0.932419	0.973816	0.0890176	0.908005	0.130218	0.4667	0.902871	S	252	___1	GPDKLLPYPTLASPASD______________	P0C1Z6	P0C1Z6	TFPT	TCF3 fusion partner
142	psites	tmt	0	0.831872	1.08852	0.102898	0.905508	0.196275	0.134893	0.834648	S	180	___1	TLSPPRRTPAPPEPGSPAPGEGPSGRKRRRV	P0C1Z6	P0C1Z6	TFPT	TCF3 fusion partner
143	psites	tmt	0	0.888753	1.18288	0.137472	1.05129	0.00465926	0.365768	0.874972	S	157	___1	TVCVDMSTNRQQFYHSVQDLSGGSRQHEAPS	P10398	P10398	ARAF	Serine/threonine-protein kinase A-Raf
144	psites	tmt	0	0.829213	0.963775	0.0136289	0.799174	0.321784	0.453678	0.902495	S	105	___1	LVSKGTLVQTKGTGASGSFKLNKKAASGEAK;LVSKGTLVQTKGTGASGSFKLNKKAASGEGK	P10412;P16401;P16402;P16403	P16401	HIST1H1E;HIST1H1A;HIST1H1T;HIST1H1B;HIST1H1D;HIST1H1C	Histone H1.4;Histone H1.1;Histone H1t;Histone H1.5;Histone H1.3;Histone H1.2
145	psites	tmt	0	0.852204	0.649287	0.0324153	0.553325	0.0843595	0.127626	0.834648	S	107	___1	SKGTLVQTKGTGASGSFKLNKKAASGEAKPK;SKGTLVQTKGTGASGSFKLNKKAASGEGKPK	P10412;P16401;P16402;P16403	P16401	HIST1H1E;HIST1H1A;HIST1H1T;HIST1H1B;HIST1H1D;HIST1H1C	Histone H1.4;Histone H1.1;Histone H1t;Histone H1.5;Histone H1.3;Histone H1.2
146	psites	tmt	0	0.947181	1.01295	0.0567639	0.959444	0.108821	0.473849	0.90494	S	83	___1	LQKAGTRTDSREDEISPPPPNPVVKGRRRRG	P10644	P10644	PRKAR1A	cAMP-dependent protein kinase type I-alpha regulatory subunit;cAMP-dependent protein kinase type I-alpha regulatory subunit, N-terminally processed
147	psites	tmt	0	1.18796	0.941377	0.111978	1.11832	0.0670248	0.0853257	0.834648	S	70	___1	MGPKGRTVIIEQSWGSPKVTKDGVTVAKSID	P10809	P10809	HSPD1	60 kDa heat shock protein, mitochondrial
148	psites	tmt	0	0.957146	1.0726	0.0895441	1.02663	0.148792	0.607542	0.946509	S	214	___1	RFIQENVFVAANHNGSPLSIKEAPKELSFGA	P11172	P11172	UMPS	Uridine 5'-monophosphate synthase;Orotate phosphoribosyltransferase;Orotidine 5'-phosphate decarboxylase
149	psites	tmt	0	1.17715	0.986927	0.0920627	1.16176	0.0501211	0.0530933	0.834648	S	1525	___1	AKSVRAKKPIKYLEESDEDDLF_________	P11388	P11388	TOP2A	DNA topoisomerase 2-alpha
150	psites	tmt	0	0.956569	0.972943	0.0850481	0.930688	0.01646	0.558636	0.936012	S	2409	___1	KSVKALSSLHGDDQDSEDEVLTIPEVKVHSG	P11717	P11717	IGF2R	Cation-independent mannose-6-phosphate receptor
151	psites	tmt	0	1.07076	0.850656	0.176799	0.910846	0.0870851	0.531131	0.930472	S	224	___1	ETGKALIQTCLNSPDSPPRSDPTTDQRMSAT	P11831	P11831	SRF	Serum response factor
152	psites	tmt	0	0.80009	1.35209	0.251936	1.0818	0.135121	0.209736	0.834648	S	23	___1	YSFFSPSPARKRHAPSPEPAVQGTGVAGVPE	P13051	P13051	UNG	Uracil-DNA glycosylase
153	psites	tmt	0	0.887701	1.04047	0.138334	0.923627	0.0307168	0.372506	0.879147	S	187	___1	KAESFFQTKALDVSASDDEIARLKKPDQAIK	P13798	P13798	APEH	Acylamino-acid-releasing enzyme
154	psites	tmt	0	0.974986	1.11573	0.159376	1.08782	0.223429	0.886478	0.986664	S	412	___1	KEKFGRKLYESLLVGSLPDMNKMLDKEDFTM	P13807	P13807	GYS1	Glycogen [starch] synthase, muscle
155	psites	tmt	0	1.16908	0.808416	0.118793	0.945104	0.100754	0.0893861	0.834648	S	78	___1	PPEPGPDRVADAKGDSESEEDEDLEVPVPSR	P13861	P13861	PRKAR2A	cAMP-dependent protein kinase type II-alpha regulatory subunit
156	psites	tmt	0	1.01513	0.972596	0.101849	0.987315	0.0877299	0.847118	0.986664	S	448	___1	KEKRINPPSSGGTSSSPIKAIFPSPTSLVAT	P14859	P14859	POU2F1	POU domain, class 2, transcription factor 1
157	psites	tmt	0	1.01895	1.01227	0.0608637	1.03145	0.216721	0.969008	1	S	22	___1	SHPRINTLGRMIRAESGPDLRYEVTSGGGGT	P15924	P15924	DSP	Desmoplakin
158	psites	tmt	0	1.05944	0.89622	0.1438	0.949493	0.310087	0.844856	0.986664	S	176	___1	VRRASSKGGGGYTCQSGSGWDEFTKHVTSEC	P15924	P15924	DSP	Desmoplakin
159	psites	tmt	0	0.838555	0.98953	0.0887483	0.829775	0.128211	0.248128	0.855001	S	2821	___1	ASVSSKGLPSPYNMSSAPGSRSGSRSGSRSG	P15924	P15924	DSP	Desmoplakin
160	psites	tmt	0	1.01277	1.18926	0.0067459	1.20445	0.0183142	0.457191	0.902495	S	2608	___1	ISTISSVRNLTIRSSSFSDTLEESSPIAAIF	P15924	P15924	DSP	Desmoplakin
161	psites	tmt	0	0.941144	1.14343	0.0245535	1.07614	0.051979	0.135236	0.834648	S	18	___1	ETAPAETATPAPVEKSPAKKKATKKAAGAGA	P16401	P16401	HIST1H1B	Histone H1.5
162	psites	tmt	0	1.05243	0.950824	0.0647599	1.00068	0.13945	0.558037	0.936012	S	663	___1	TSKAFTGREFDELNPSAQRDACLNARCFARV	P16615	P16615	ATP2A2	Sarcoplasmic/endoplasmic reticulum calcium ATPase 2
163	psites	tmt	0	0.898954	1.29372	0.273033	1.16299	0.201909	0.562406	0.936012	S	16	___1	MASSDIQVKELEKRASGQAFELILSPRSKES	P16949	P16949	STMN1	Stathmin
164	psites	tmt	0	0.815686	1.21605	0.21323	0.991915	0.34295	0.319393	0.858718	S	25	___1	ELEKRASGQAFELILSPRSKESVPEFPLSPP	P16949	P16949	STMN1	Stathmin
165	psites	tmt	0	1.27161	1.11955	0.166125	1.42363	0.406895	0.400071	0.888999	S	38	___1	ILSPRSKESVPEFPLSPPKKKDLSLEEIQKK	P16949	P16949	STMN1	Stathmin
166	psites	tmt	0	1.07087	1.04235	0.198847	1.11623	0.688577	0.834397	0.986664	S	1697	___1	PLPVKESDQTLAALLSPKESSGGEKEVPPPP	P18583	P18583	SON	Protein SON
167	psites	tmt	0	0.935844	1.00458	0.0117606	0.940131	0.0891144	0.395714	0.888673	S	283	___1	VEYQMKSVLKSVESTSPEPSKIMLVEPPVAK	P18583	P18583	SON	Protein SON
168	psites	tmt	0	0.958975	0.850394	0.0113223	0.815507	0.019113	0.116278	0.834648	S	115	___1	EKGPVPTFQPFQRSISADDDLQESSRRPQRK	P18615	P18615	NELFE	Negative elongation factor E
169	psites	tmt	0	1.08576	0.948776	0.0757117	1.03015	0.205055	0.600316	0.941922	S	353	___1	AATGKSVWGSLAVQNSPKGCHRDKRTQIVYS	P18615	P18615	NELFE	Negative elongation factor E
170	psites	tmt	0	0.786849	1.18019	0.130949	0.928629	0.104168	0.034732	0.834648	S	14	___1	__MAAYKLVLIRHGESAWNLENRFSGWYDAD	P18669	P18669	PGAM1	Phosphoglycerate mutase 1
171	psites	tmt	0	1.00493	1.06309	0.0493833	1.06833	0.118664	0.993851	1	S	141	___1	KQLPKRTIQEVLEEQSEDEDREAKRKKEEEE	P18858	P18858	LIG1	DNA ligase 1
172	psites	tmt	0	1.09572	1.00077	0.0809772	1.09657	0.30715	0.704786	0.97161	S	66	___1	SPVKRPGRKAARVLGSEGEEEDEALSPAKGQ	P18858	P18858	LIG1	DNA ligase 1
173	psites	tmt	0	0.984129	1.05866	0.131761	1.04186	0.107432	0.89667	0.989478	S	76	___1	ARVLGSEGEEEDEALSPAKGQKPALDCSQVS	P18858	P18858	LIG1	DNA ligase 1
174	psites	tmt	0	0.894745	1.03606	0.109409	0.927009	0.196772	0.350097	0.874972	S	563	___1	IEGRAIRLELQGPRGSPNARSQPSKTLFVKG	P19338	P19338	NCL	Nucleolin
175	psites	tmt	0	0.836586	1.30027	0.605711	1.08779	0.455902	0.705138	0.97161	S	619	___1	RETGSSKGFGFVDFNSEEDAKAAKEAMEDGE	P19338	P19338	NCL	Nucleolin
176	psites	tmt	0	0.964174	1.20922	0.0586455	1.1659	0.0489489	0.378146	0.879147	S	67	___1	KGKKAAATSAKKVVVSPTKKVAVATPAKKAA	P19338	P19338	NCL	Nucleolin
177	psites	tmt	0	1.08339	0.985211	0.0562495	1.06737	0.15942	0.498103	0.910559	S	785	___1	SSPGTDDVFTPAPSDSPSSQRIQRCLSDPGP	P19634	P19634	SLC9A1	Sodium/hydrogen exchanger 1
178	psites	tmt	0	1.12742	0.989836	0.21105	1.11596	0.0744993	0.253104	0.855001	S	1193	___1	SIHNFMTHPEFRIEDSEPHIPLIDDTDAEDD	P20020	P20020	ATP2B1	Plasma membrane calcium-transporting ATPase 1
179	psites	tmt	0	0.836425	1.09216	0.039754	0.913513	0.14957	0.236092	0.845101	S	247	___1	LVEECNRAECIQRGVSPSQAQGLGSNLVTEV	P20823	P20823	HNF1A	Hepatocyte nuclear factor 1-alpha
180	psites	tmt	0	0.97503	0.897498	0.0692695	0.875087	0.121826	0.80574	0.986664	S	249	___1	EECNRAECIQRGVSPSQAQGLGSNLVTEVRV	P20823	P20823	HNF1A	Hepatocyte nuclear factor 1-alpha
181	psites	tmt	0	0.903539	1.00286	0.073393	0.906119	0.0786803	0.107369	0.834648	S	646	___1	SDRLYKENYEKTKAKSMNYCETPKYQLDTQL	P20929	P20929	NEB	Nebulin
182	psites	tmt	0	0.923221	1.01644	0.182745	0.938395	0.10839	0.547171	0.936012	S	1084	___1	KVKAFGPGLQGGSAGSPARFTIDTKGAGTGG	P21333	P21333	FLNA	Filamin-A
183	psites	tmt	0	0.925521	1.09267	0.300334	1.01129	0.192232	0.731388	0.978776	S	104	___1	DQLARGLKLTFDSSFSPNTGKKNAKIKTGYK	P21796	P21796	VDAC1	Voltage-dependent anion-selective channel protein 1
184	psites	tmt	0	0.988427	0.922455	0.105495	0.91178	0.114904	0.877625	0.986664	S	686	___1	IQNKRAMRRYLERGESIEPLDPSEKANKVLA	P21860	P21860	ERBB3	Receptor tyrosine-protein kinase erbB-3
185	psites	tmt	0	0.791988	1.10442	0.174082	0.874688	0.136907	0.280737	0.855969	S	27	___1	KLYEGKTKEVYELLDSPGKVLLQSKDQITAG	P22234	P22234	PAICS	Multifunctional protein ADE2;Phosphoribosylaminoimidazole-succinocarboxamide synthase;Phosphoribosylaminoimidazole carboxylase
186	psites	tmt	0	1.23401	0.963288	0.2389	1.18871	0.0511418	0.181017	0.834648	S	1044	___1	RHVRALVLELCCNDESGEDVEVPYVRYTIR_	P22314	P22314	UBA1	Ubiquitin-like modifier-activating enzyme 1
187	psites	tmt	0	1.08542	0.987084	0.146196	1.0714	0.0792878	0.356674	0.874972	S	259	___1	YNGYGGGPGGGNFGGSPGYGGGRGGYGGGGP	P22626	P22626	HNRNPA2B1	Heterogeneous nuclear ribonucleoproteins A2/B1
188	psites	tmt	0	0.886057	1.04162	0.213461	0.922934	0.05878	0.556601	0.936012	S	100	___1	DLDEKKKEPAITSQNSPEAREESTSSGNVSN	P23193	P23193	TCEA1	Transcription elongation factor A protein 1
189	psites	tmt	0	1.08274	0.976456	0.0973009	1.05725	0.0866526	0.344537	0.874972	S	3	___1	_____________MASGVAVSDGVIKVFNDM	P23528	P23528	CFL1	Cofilin-1
190	psites	tmt	0	1.23972	0.813807	0.292774	1.00889	0.0976528	0.269944	0.855969	S	156	___1	EEVKDRCTLAEKLGGSAVISLEGKPL_____	P23528	P23528	CFL1	Cofilin-1
191	psites	tmt	0	1.31154	0.777846	0.265583	1.02017	0.0771173	0.282963	0.855969	S	328	___1	AKTQDGVALEIQPLNSQEGIDNEEKDKKAVK	P23634	P23634	ATP2B4	Plasma membrane calcium-transporting ATPase 4
192	psites	tmt	0	0.923629	1.06964	0.03144	0.987947	0.0655088	0.0702749	0.834648	S	250	___1	EAEKYAKESLKEEDESDDDNM__________	P25788	P25788	PSMA3	Proteasome subunit alpha type-3
193	psites	tmt	0	0.891062	1.07705	0.0325581	0.959718	0.045304	0.00602241	0.723135	S	425	___1	EDVFYTYKGSLAPQDSDSEVSQNRSPHQESL	P26045	P26045	PTPN3	Tyrosine-protein phosphatase non-receptor type 3
194	psites	tmt	0	0.939014	1.06486	0.0184233	0.999923	0.150229	0.455441	0.902495	S	79	___1	PLTRGAKEEHGGLIRSPRHEKKKKVRKYWDV	P26368	P26368	U2AF2	Splicing factor U2AF 65 kDa subunit
195	psites	tmt	0	0.937519	1.0786	0.267932	1.01121	0.112996	0.784341	0.986664	S	74	___1	CNVQSTQDEFEELTMSQKNGGNVLQMMYEKP	P27707	P27707	DCK	Deoxycytidine kinase
196	psites	tmt	0	1.16485	1.01465	0.141843	1.18191	0.0884956	0.191817	0.834648	S	280	___1	ALATKTEVALAKDMESPTKLDVTLAKDMQPS	P27816	P27816	MAP4	Microtubule-associated protein 4
197	psites	tmt	0	1.00745	0.943877	0.0626565	0.950913	0.180707	0.972414	1	S	928	___1	PSSTTPRLSRLATNTSAPDLKNVRSKVGSTE	P27816	P27816	MAP4	Microtubule-associated protein 4
198	psites	tmt	0	0.857506	1.0197	0.145467	0.874401	0.14843	0.210213	0.834648	S	941	___1	NTSAPDLKNVRSKVGSTENIKHQPGGGRAKV	P27816	P27816	MAP4	Microtubule-associated protein 4
199	psites	tmt	0	1.08605	0.957003	0.0808979	1.03935	0.0914916	0.224647	0.835963	S	1073	___1	SQKLNFKEKAQAKVGSLDNVGHLPAGGAVKT	P27816	P27816	MAP4	Microtubule-associated protein 4
200	psites	tmt	0	0.95804	1.10476	0.184669	1.0584	0.0986495	0.781207	0.986664	S	583	___1	EDRKPKAEEDEILNRSPRNRKPRRE______	P27824	P27824	CANX	Calnexin
201	psites	tmt	0	1.43589	1.02621	0.275458	1.47353	0.0755002	0.0834872	0.834648	S	668	___1	EFTQYTTHHILKSLASIEAKCSDMSSENTTG	P28290	P28290	SSFA2	Sperm-specific antigen 2
202	psites	tmt	0	1.73806	0.758545	0.432553	1.3184	0.321442	0.279533	0.855969	S	739	___1	RYLFAKAGYPLRRSQSLPTTLLSPVRVVSSV	P28290	P28290	SSFA2	Sperm-specific antigen 2
203	psites	tmt	0	0.853435	1.08777	0.122249	0.928344	0.170469	0.242795	0.85307	S	92	___1	KIAIWLKDCRTPLGASLDEQSSSTLKGVLVR	P28290	P28290	SSFA2	Sperm-specific antigen 2
204	psites	tmt	0	0.977948	0.94534	0.100316	0.924494	0.0519861	0.754404	0.984326	S	384	___1	ARGRNAPAAVDEGSISPRTLSAIKRALDDDE	P28715	P28715	ERCC5	DNA repair protein complementing XP-G cells
205	psites	tmt	0	0.949613	1.1038	0.144864	1.04818	0.087491	0.605853	0.944575	S	776	___1	KVSDFGLSRFLEDDTSDPTYTSALGGKIPIR	P29323	P29323	EPHB2	Ephrin type-B receptor 2
206	psites	tmt	0	1.22007	0.954203	0.111092	1.16419	0.126543	0.0639573	0.834648	S	133	___1	SSPGHRATAPQTQHVSPMRQVEPPAKKPATP	P29692	P29692	EEF1D	Elongation factor 1-delta
207	psites	tmt	0	0.910529	0.993933	0.0126852	0.905004	0.312489	0.650234	0.95855	S	119	___1	AISKLEARLNVLEKSSPGHRATAPQTQHVSP	P29692	P29692	EEF1D	Elongation factor 1-delta
208	psites	tmt	0	0.931769	0.982955	0.235166	0.915887	0.10521	0.721782	0.974845	S	145	___1	ASSTSSPKAEDGATPSPSNETPKKKKKRFSF	P29966	P29966	MARCKS	Myristoylated alanine-rich C-kinase substrate
209	psites	tmt	0	1.06303	1.13721	0.18345	1.20889	0.119534	0.712525	0.972472	S	170	___1	KKRFSFKKSFKLSGFSFKKNKKEAGEGGEAE	P29966	P29966	MARCKS	Myristoylated alanine-rich C-kinase substrate
210	psites	tmt	0	0.845473	1.13598	0.0743743	0.960439	0.175913	0.130645	0.834648	S	47	___1	DCENEEDNSYNRGGLSPANDTGAKKKKKKQK	P30419	P30419	NMT1	Glycylpeptide N-tetradecanoyltransferase 1
211	psites	tmt	0	0.829878	1.20014	0.217521	0.99597	0.194219	0.332858	0.866244	S	20	___1	RVPLAPITDPQQLQLSPLKGLSLVDKENTPP	P31350	P31350	RRM2	Ribonucleoside-diphosphate reductase subunit M2
212	psites	tmt	0	1.14337	0.96876	0.154424	1.10765	0.156923	0.28283	0.855969	S	104	___1	NNVEMDWVLKHTGPNSPDTANDGFVRLRGLP;NSVEMDWVLKHTGPNSPDTANDGFVRLRGLP	P31943;P55795	P55795	HNRNPH1;HNRNPH2	Heterogeneous nuclear ribonucleoprotein H;Heterogeneous nuclear ribonucleoprotein H, N-terminally processed;Heterogeneous nuclear ribonucleoprotein H2
213	psites	tmt	0	0.877488	1.00302	0.169095	0.880136	0.0346928	0.418995	0.896798	S	187	___1	PKRKKGRKTKPPRPDSPATTPNISVKKKNKD	P32519	P32519	ELF1	ETS-related transcription factor Elf-1
214	psites	tmt	0	1.01674	1.026	0.0196006	1.04318	0.172597	0.94295	0.996956	S	334	___1	ATSNRNQTSRSRVSSSPGVKGGATTVLKPGN	P32519	P32519	ELF1	ETS-related transcription factor Elf-1
215	psites	tmt	0	1.03367	1.14609	0.122313	1.18468	0.141476	0.747162	0.98231	S	131	___1	PDLGSAQKGLQVDLQSDGAAAEDIVASEQSL	P33991	P33991	MCM4	DNA replication licensing factor MCM4
216	psites	tmt	0	1.12806	0.973023	0.163685	1.09763	0.101175	0.224495	0.835963	S	641	___1	RKAVLMIRTPEELDDSDFETEDFDVRSRTSV	P35221	P35221	CTNNA1	Catenin alpha-1
217	psites	tmt	0	0.708705	1.10502	0.0882585	0.783133	0.314408	0.257506	0.855001	S	368	___1	TPKKTKSSPAKKESVSPEDSEKKRTNYQAYR	P35251	P35251	RFC1	Replication factor C subunit 1
218	psites	tmt	0	1.02044	0.930844	0.0887427	0.949872	0.0567343	0.801075	0.986664	S	433	___1	PAAKRLRLDTGPQSLSGKSTPQPPSGKTTPN	P35269	P35269	GTF2F1	General transcription factor IIF subunit 1
219	psites	tmt	0	1.0831	1.02663	0.146519	1.11194	0.109429	0.42266	0.896798	S	103	___1	RPKGLQRLLLINNAGSLGDVSKGFVDLSDST	P35270	P35270	SPR	Sepiapterin reductase
220	psites	tmt	0	1.11251	1.08448	0.195535	1.20649	0.174677	0.497035	0.910559	S	1078	___1	PQGPGGMSAFTRVNLSPNRNQSAKVIRADPQ	P35568	P35568	IRS1	Insulin receptor substrate 1
221	psites	tmt	0	0.677797	1.22362	0.158476	0.829364	0.335777	0.074767	0.834648	S	1943	___1	FVVPRRMARKGAGDGSDEEVDGKADGAEAKP	P35579	P35579	MYH9	Myosin-9
222	psites	tmt	0	0.932643	1.06185	0.0574885	0.990324	0.218263	0.571581	0.936012	S	358	___1	LLNPEKYKAKSRSPGSPVGEGTGSPPKWQIG	P35611	P35611	ADD1	Alpha-adducin
223	psites	tmt	0	0.993609	0.961467	0.0300044	0.955321	0.116204	0.885585	0.986664	S	464	___1	NSGRGDEASEEGQNGSSPKSKTKWTKEDGHR	P35611	P35611	ADD1	Alpha-adducin
224	psites	tmt	0	1.00868	0.967903	0.0484181	0.976302	0.0868687	0.898589	0.989979	S	465	___1	SGRGDEASEEGQNGSSPKSKTKWTKEDGHRT	P35611	P35611	ADD1	Alpha-adducin
225	psites	tmt	0	1.11817	0.927747	0.0668553	1.03738	0.124111	0.194123	0.834648	S	678	___1	VQKSPRITPPAAKPGSPQAKSLQPAVAEKQG	P35658	P35658	NUP214	Nuclear pore complex protein Nup214
226	psites	tmt	0	0.852659	0.83348	0.147042	0.710674	0.124339	0.230072	0.843254	S	163	___1	PNWFPKKSKENPRNFSDNQLQEGKNVIGLQM	P37802	P37802	TAGLN2	Transgelin-2
227	psites	tmt	0	1.13029	0.981292	0.0630957	1.10915	0.133275	0.151099	0.834648	S	208	___1	PPRREPLPSRRDVYLSPRDDGYSTKDSYSSR	P38159;Q96E39	P38159	RBMX;RBMXL1	RNA-binding motif protein, X chromosome;RNA-binding motif protein, X chromosome, N-terminally processed;RNA binding motif protein, X-linked-like-1
228	psites	tmt	0	0.869304	0.953189	0.250131	0.828611	0.214845	0.549956	0.936012	S	566	___1	TVFWKELIDPRLIIESPSNTSSTEPA_____	P38432	P38432	COIL	Coilin
229	psites	tmt	0	0.983529	1.04301	0.00522137	1.02583	0.0203527	0.377697	0.879147	S	568	___1	FWKELIDPRLIIESPSNTSSTEPA_______	P38432	P38432	COIL	Coilin
230	psites	tmt	0	0.795716	1.22462	0.156219	0.974451	0.302541	0.419757	0.896798	S	727	___1	CVTPTTCSNTIDLPMSPRTLDSLMQFGNNGE	P40763	P40763	STAT3	Signal transducer and activator of transcription 3
231	psites	tmt	0	1.03134	0.949965	0.0561856	0.97974	0.0691258	0.522516	0.930181	S	66	___1	PPLPAGTNSKGPPDFSSDEEREPTPVLGSGA	P42166;P42167	P42167	TMPO	Lamina-associated polypeptide 2, isoform alpha;Thymopoietin;Thymopentin;Lamina-associated polypeptide 2, isoforms beta/gamma;Thymopoietin;Thymopentin
232	psites	tmt	0	0.851664	1.11174	0.0561645	0.946831	0.0702998	0.127213	0.834648	S	483	___1	PPLLKTNNNQILEVKSPIKQSKSDKQIKNGE	P42568	P42568	MLLT3	Protein AF-9
233	psites	tmt	0	1.24272	1.00464	0.136404	1.24849	0.271208	0.321419	0.858718	S	268	___1	MSWIPQETLNQINKASPRRLPRKRAQKRSVG	P43307	P43307	SSR1	Translocon-associated protein subunit alpha
234	psites	tmt	0	0.556712	1.23889	0.340577	0.689704	0.521127	0.303528	0.858718	S	60	___1	EEELFKMRAKLFRFASENDLPEWKERGTGDV	P43487	P43487	RANBP1	Ran-specific GTPase-activating protein
235	psites	tmt	0	0.95257	0.925032	0.0981217	0.881158	0.147409	0.637299	0.952382	S	115	___1	DQICQGLKLTFDTTFSPNTGKKSGKIKSSYK	P45880	P45880	VDAC2	Voltage-dependent anion-selective channel protein 2
236	psites	tmt	0	1.04047	1.06332	0.17935	1.10635	0.0388638	0.7511	0.983607	S	2344	___1	DKPTTDEKTTKIACKSPQPDPVDTPASTKQR	P46013	P46013	MKI67	Antigen KI-67
237	psites	tmt	0	0.965824	1.01639	0.188481	0.981653	0.409197	0.851158	0.986664	S	1861	___1	NPTTDEKTTKKILCKSPQSDPADTPTNTKQR	P46013	P46013	MKI67	Antigen KI-67
238	psites	tmt	0	1.02174	1.10182	0.090536	1.12577	0.0521601	0.786328	0.986664	S	357	___1	PAKMKTPVQYSQQQNSPQKHKNKDLYTTGRR	P46013	P46013	MKI67	Antigen KI-67
239	psites	tmt	0	0.75498	1.18914	0.0681064	0.897774	0.331965	0.0821978	0.834648	S	732	___1	NAPPKGTDTQTPAVLSPSKTQATLKPKDHHQ	P46087	P46087	NOP2	Probable 28S rRNA (cytosine(4447)-C(5))-methyltransferase
240	psites	tmt	0	0.649856	1.50748	0.29944	0.979645	0.652035	0.433766	0.897566	S	634	___1	GLNPKLEKCGLGQENSDNEHLVENEVSLLLE	P46100	P46100	ATRX	Transcriptional regulator ATRX
241	psites	tmt	0	1.02494	1.01052	0.0216218	1.03572	0.146222	0.831302	0.986664	S	1117	___1	LRSDIQKRLQEDPNYSPQRFPNAQRAFADDP	P46379	P46379	BAG6	Large proline-rich protein BAG6
242	psites	tmt	0	0.982716	0.979996	0.0836803	0.963058	0.106709	0.82357	0.986664	S	340	___1	LLRQAMRNINPSTANSPKCQELALRSQLPTL	P46937	P46937	YAP1	Transcriptional coactivator YAP1
243	psites	tmt	0	1.78424	0.56695	0.291431	1.01158	0.312848	0.201727	0.834648	S	426	___1	APPSATLPAGAAAPPSPPFSFQLPRRLSDSP	P47974	P47974	ZFP36L2	Zinc finger protein 36, C3H1 type-like 2
244	psites	tmt	0	1.04298	1.03014	0.0181927	1.07442	0.0586269	0.441936	0.897566	S	1147	___1	LTQVPLAPPPPGAPPSPAPARFTARGGRVFT	P48634	P48634	PRRC2A	Protein PRRC2A
245	psites	tmt	0	1.30316	0.911117	0.0565104	1.18733	0.124873	0.114591	0.834648	S	1004	___1	GKLGGPKETPPNGNLSPAPRLRRDYSYERVG	P48634	P48634	PRRC2A	Protein PRRC2A
246	psites	tmt	0	0.849568	1.10769	0.0836649	0.941059	0.158264	0.317898	0.858718	S	380	___1	SGEERPPEADGKKGNSPNSEPPTPKTAWAET	P48634	P48634	PRRC2A	Protein PRRC2A
247	psites	tmt	0	0.994679	1.07922	0.119018	1.07347	0.216728	0.916637	0.991742	S	36	___1	ASPAKANGQENGHVKSNGDLSPKGEGESPPV	P49006	P49006	MARCKSL1	MARCKS-related protein
248	psites	tmt	0	0.898092	1.14513	0.163637	1.02843	0.181928	0.411649	0.896798	S	22	___1	KAPRGDVTAEEAAGASPAKANGQENGHVKSN	P49006	P49006	MARCKSL1	MARCKS-related protein
249	psites	tmt	0	1.14632	0.933279	0.136244	1.06983	0.143498	0.302753	0.858718	S	84	___1	WQPSSSRFIHQQPQSSSPVYGSSAKTSSVSN	P49023	P49023	PXN	Paxillin
250	psites	tmt	0	1.7791	0.68261	0.584396	1.21443	0.198281	0.289137	0.858718	S	46	___1	TGQKIQIVTAVDASGSPKQQFILTSPDGAGT	P49116	P49116	NR2C2	Nuclear receptor subfamily 2 group C member 2
251	psites	tmt	0	1.07757	0.966374	0.217811	1.04134	0.0988834	0.580033	0.936474	S	106	___1	ENHVRNNQVLGIGSGSTIVHAVQRIAERVKQ	P49247	P49247	RPIA	Ribose-5-phosphate isomerase
252	psites	tmt	0	0.676093	1.05013	0.0973433	0.709988	0.406872	0.184624	0.834648	S	412	___1	KGMKDDKEEEEDGTGSPQLNNR_________	P49407	P49407	ARRB1	Beta-arrestin-1
253	psites	tmt	0	1.00489	1.06972	0.109452	1.07494	0.358212	0.821566	0.986664	S	362	___1	SPANLSRHKAAAYDISEDEED__________	P49585	P49585	PCYT1A	Choline-phosphate cytidylyltransferase A
254	psites	tmt	0	0.911202	1.09146	0.207716	0.994536	0.328589	0.570265	0.936012	S	108	___1	EGLALDDEDVEELTASQREAAERAMRQRDRE	P49736	P49736	MCM2	DNA replication licensing factor MCM2
255	psites	tmt	0	0.998893	1.02967	0.126217	1.02853	0.118124	0.996985	1	S	139	___1	AGRGLGRMRRGLLYDSDEEDEERPARKRRQV	P49736	P49736	MCM2	DNA replication licensing factor MCM2
256	psites	tmt	0	0.862217	1.03825	0.252384	0.895195	0.118633	0.565992	0.936012	S	703	___1	KLPVDSVFNKFEDEDSDDVPRKRKLVPLDYG	P49756	P49756	RBM25	RNA-binding protein 25
257	psites	tmt	0	1.01302	0.966951	0.0347999	0.979543	0.0847858	0.821065	0.986664	S	677	___1	HRPKIGLSLKLGASNSPGQPNSVKRKKLPVD	P49756	P49756	RBM25	RNA-binding protein 25
258	psites	tmt	0	1.11799	0.96968	0.0171901	1.08409	0.10908	0.299434	0.858718	S	276	___1	IPRRHAPIEQLARQGSFRGFPALSQKMSPFK	P49757	P49757	NUMB;NUMBL	Protein numb homolog;Numb-like protein
259	psites	tmt	0	1.02407	0.837983	0.109319	0.858157	0.0993112	0.755946	0.98551	S	634	___1	QWAALENKSKQRTNPSPTNPFSSDLQKTFEI	P49757	P49757	NUMB	Protein numb homolog
260	psites	tmt	0	1.01637	1.04257	0.0912225	1.05963	0.0565062	0.786334	0.986664	S	2668	___1	LPPTFFCYKNRPDYVSEEEEDDEDFETAVKK	P49792	P49792	RANBP2	E3 SUMO-protein ligase RanBP2
261	psites	tmt	0	0.982397	0.994725	0.125118	0.977215	0.165789	0.833643	0.986664	S	2900	___1	VGTQSAGKVGEDEDGSDEEVVHNEDIHFEPI	P49792	P49792	RANBP2	E3 SUMO-protein ligase RanBP2
262	psites	tmt	0	0.981882	1.04111	0.0594549	1.02224	0.160121	0.804976	0.986664	S	21	___1	ADVERYIASVQGSTPSPRQKSMKGFYFAKLY	P49792	P49792	RANBP2	E3 SUMO-protein ligase RanBP2
263	psites	tmt	0	0.859927	1.11767	0.176071	0.961114	0.076668	0.279874	0.855969	S	210	___1	KAVVQAKLTTTGQVTSPVKGASFVTSTNPRK	P49916	P49916	LIG3	DNA ligase 3
264	psites	tmt	0	0.962537	0.985459	0.2475	0.948541	0.284525	0.844215	0.986664	S	649	___1	NVTTKNYSEVIEVDESDVEEDIFPTTSKTDQ	P49959	P49959	MRE11A	Double-strand break repair protein MRE11A
265	psites	tmt	0	1.12534	1.11866	0.0583011	1.25886	0.0881987	0.0715995	0.834648	S	139	___1	KNEVKKLQKAALLKASPKKAPGTKGTAAAAA	P50914	P50914	RPL14	60S ribosomal protein L14
266	psites	tmt	0	0.874765	1.10676	0.0440272	0.968155	0.0679452	0.0452231	0.834648	S	14	___1	__MDGTRTSLDIEEYSDTEVQKNQVLTLEEW	P51580	P51580	TPMT	Thiopurine S-methyltransferase
267	psites	tmt	0	0.959468	1.01533	0.101927	0.97418	0.208276	0.669579	0.960786	S	1507	___1	PVPGPSVPPPEELQVSPGPRQQLPPRQLLQS	P51610	P51610	HCFC1	Host cell factor 1;HCF N-terminal chain 1;HCF N-terminal chain 2;HCF N-terminal chain 3;HCF N-terminal chain 4;HCF N-terminal chain 5;HCF N-terminal chain 6;HCF C-terminal chain 1;HCF C-terminal chain 2;HCF C-terminal chain 3;HCF C-terminal chain 4;HCF C-terminal chain 5;HCF C-terminal chain 6
268	psites	tmt	0	0.986886	0.971885	0.0773152	0.959139	0.2297	0.808789	0.986664	S	165	___1	EKGALKRRAGDLLEDSPKRPKEAENPEGEEK	P51858	P51858	HDGF	Hepatoma-derived growth factor
269	psites	tmt	0	1.07879	0.951447	0.554503	1.02641	0.0734864	0.741583	0.98231	S	358	___1	YGPMKGGSFGGRSSGSPYGGGYGSGGGSGGY	P51991	P51991	HNRNPA3	Heterogeneous nuclear ribonucleoprotein A3
270	psites	tmt	0	1.25846	0.876035	0.144173	1.10245	0.129253	0.112153	0.834648	S	62	___1	MLKRRNVSSFPDDATSPLQENRNNQGTVNWS	P52292	P52292	KPNA2	Importin subunit alpha-1
271	psites	tmt	0	1.25176	0.976443	0.0105482	1.22227	0.0935744	0.079356	0.834648	S	14	___1	__MSRQSTLYSFFPKSPALSDANKASARASR	P52701	P52701	MSH6	DNA mismatch repair protein Msh6
272	psites	tmt	0	0.979705	1.18724	0.0684976	1.16314	0.140274	0.747386	0.98231	S	137	___1	EKGKSVRVHVQFFDDSPTRGWVSKRLLKPYT	P52701	P52701	MSH6	DNA mismatch repair protein Msh6
273	psites	tmt	0	1.03246	0.936106	0.209196	0.966496	0.0745571	0.744466	0.98231	S	624	___1	ENPLKRGLVAAYSGDSDNEEELVERLESEEE	P52756	P52756	RBM5	RNA-binding protein 5
274	psites	tmt	0	0.960781	0.919005	0.433689	0.882963	0.250207	0.987314	1	S	105	___1	KKPAQEETEETSSQESAEED___________	P52926	P52926	HMGA2	High mobility group protein HMGI-C
275	psites	tmt	0	0.774093	1.15203	0.0437316	0.89178	0.0894075	0.00181853	0.723135	S	44	___1	RGRPRKQQQEPTGEPSPKRPRGRPKGSKNKS	P52926	P52926	HMGA2	High mobility group protein HMGI-C
276	psites	tmt	0	1.14735	1.04749	0.14142	1.20183	0.171226	0.255881	0.855001	S	623	___1	SNLFSPVNRDSENLASPSEYPENGERFSFLS	P52948	P52948	NUP98	Nuclear pore complex protein Nup98-Nup96;Nuclear pore complex protein Nup98;Nuclear pore complex protein Nup96
277	psites	tmt	0	0.923965	1.05666	0.0562873	0.97632	0.0896815	0.181621	0.834648	S	608	___1	PKKSIKKLVLKNLNNSNLFSPVNRDSENLAS	P52948	P52948	NUP98	Nuclear pore complex protein Nup98-Nup96;Nuclear pore complex protein Nup98;Nuclear pore complex protein Nup96
278	psites	tmt	0	0.983484	0.977843	0.0937643	0.961693	0.0974133	0.876667	0.986664	S	612	___1	IKKLVLKNLNNSNLFSPVNRDSENLASPSEY	P52948	P52948	NUP98	Nuclear pore complex protein Nup98-Nup96;Nuclear pore complex protein Nup98;Nuclear pore complex protein Nup96
279	psites	tmt	0	1.00813	0.972176	0.0459568	0.980077	0.225172	0.958205	0.998967	S	312	___1	RSIIQRIQEFCNLHQSKEENLISS_______	P53384	P53384	NUBP1	Cytosolic Fe-S cluster assembly factor NUBP1
280	psites	tmt	0	1.10685	0.998147	0.157104	1.1048	0.0739805	0.255784	0.855001	S	481	___1	PAKKAKPAMPQDSVPSPRSLQGKSTTLFSRH	P53396	P53396	ACLY	ATP-citrate synthase
281	psites	tmt	0	1.08366	1.04653	0.235627	1.13409	0.143737	0.514656	0.926206	S	102	___1	EEESKEPVADEEEEDSDDDVEPITEFRFVPS	P54105	P54105	CLNS1A	Methylosome subunit pICln
282	psites	tmt	0	1.96883	0.687873	0.640092	1.35431	0.379934	0.310392	0.858718	S	632	___1	VIATVASSPAGYKTASPPGPPPYGKRAPSPG	P54259	P54259	ATN1	Atrophin-1
283	psites	tmt	0	1.6168	0.830936	0.156965	1.34346	0.171491	0.101061	0.834648	S	769	___1	CKVSDFGLSRFLEENSSDPTYTSSLGGKIPI	P54760	P54760	EPHB4	Ephrin type-B receptor 4
284	psites	tmt	0	1.22263	0.927304	0.0657658	1.13375	0.224026	0.22535	0.835963	S	116	___1	LARHRKIVEPEVVGESDSEVEGDAWRMERED	P55081	P55081	MFAP1	Microfibrillar-associated protein 1
285	psites	tmt	0	1.01046	1.00996	0.0214796	1.02052	0.164024	0.977446	1	S	1182	___1	RADHRSSPNVANQPPSPGGKSAYASGTTAKI	P55196	P55196	MLLT4	Afadin
286	psites	tmt	0	1.0063	1.09468	0.0985947	1.10157	0.142593	0.976532	1	S	1799	___1	GAPENLTFKERQRLFSQGQDVSNKVKASRKL	P55196	P55196	MLLT4	Afadin
287	psites	tmt	0	0.787097	1.38152	0.526542	1.08739	0.281206	0.532258	0.931671	S	1107	___1	QGAIYHGLATLLNQPSPMMQRISDRRGSGKP	P55196	P55196	MLLT4	Afadin
288	psites	tmt	0	0.862766	1.04967	0.0876824	0.905623	0.173528	0.184213	0.834648	S	1779	___1	CRDAKEKRSKSQDADSPGSSGAPENLTFKER	P55196	P55196	MLLT4	Afadin
289	psites	tmt	0	1.10235	1.00675	0.0923764	1.10979	0.0883778	0.393599	0.888152	S	632	___1	IPVSFGGHRPLSRAQSSPASATFPVSVQEPP	P56524	P56524	HDAC4	Histone deacetylase 4
290	psites	tmt	0	1.33865	0.93034	0.216475	1.24541	0.127643	0.106349	0.834648	S	565	___1	AHAQAGVQVKQEPIESDEEEAEPPREVEPGQ	P56524	P56524	HDAC4	Histone deacetylase 4
291	psites	tmt	0	0.992106	0.979585	0.139474	0.971852	0.116733	0.964625	1	S	246	___1	GMYDAKDDFPLRKTASEPNLKLRSRLKQKVA;GPYDSRDDFPLRKTASEPNLKVRSRLKQKVA	P56524;Q9UQL6	P56524	HDAC4;HDAC5;HDAC9	Histone deacetylase 4;Histone deacetylase 5;Histone deacetylase 9
292	psites	tmt	0	1.09523	0.874893	0.211995	0.958211	0.0456184	0.577531	0.936474	S	467	___1	SIHKLRQHRPLGRTQSAPLPQNAQALQHLVI	P56524	P56524	HDAC4	Histone deacetylase 4
293	psites	tmt	0	0.873023	1.42296	0.111812	1.24228	0.114873	0.146964	0.834648	S	208	___1	NYYDAYQAQPLATRSSPRPGQPPKVKSEFNS	P57739	P57739	CLDN2	Claudin-2
294	psites	tmt	0	1.06295	0.972422	0.111817	1.03364	0.206553	0.747216	0.98231	S	37	___1	TARKQSAQKRVLLQASQDENFGNTTPRNQVI	P57740	P57740	NUP107	Nuclear pore complex protein Nup107
295	psites	tmt	0	0.854884	1.03853	0.0793694	0.887819	0.0116176	0.111779	0.834648	S	439	___1	RLKGPEQLNKHGQGASEDNIINKFGSTSRLT	P57789	P57789	KCNK10	Potassium channel subfamily K member 10
296	psites	tmt	0	1.08358	0.968853	0.159314	1.04983	0.116424	0.426443	0.897566	S	58	___1	KFFVGGNWKMNGRKQSLGELIGTLNAAKVPA	P60174	P60174	TPI1	Triosephosphate isomerase
297	psites	tmt	0	1.17512	1.00802	0.052513	1.18455	0.0595016	0.0246241	0.812212	S	399	___1	IDSKLGHVVMGNNAVSPYQQVIEKTKSLSFR	P60228	P60228	EIF3E	Eukaryotic translation initiation factor 3 subunit E
298	psites	tmt	0	0.872073	1.12404	0.280368	0.980241	0.290006	0.530525	0.930181	S	17	___1	PGPTPSGTNVGSSGRSPSKAVAARAAGSTVR	P60468	P60468	SEC61B	Protein transport protein Sec61 subunit beta
299	psites	tmt	0	0.944539	1.02685	0.0325958	0.969897	0.142315	0.610829	0.948	S	185	___1	KAKMDKKLEGNSPQGSNQGVKITPDQQKRSS	P61006	P61006	RAB8A	Ras-related protein Rab-8A
300	psites	tmt	0	0.97728	1.37357	0.184693	1.34236	0.358042	0.833406	0.986664	S	51	___1	KSQGKVLQATVVAVGSGSKGKGGEIQPVSVK	P61604	P61604	HSPE1	10 kDa heat shock protein, mitochondrial
301	psites	tmt	0	0.656185	0.928556	0.213375	0.609305	0.322603	0.256406	0.855001	S	216	___1	RVVECIKIILDLISESPIKGRAQPYDPNFYD	P61978	P61978	HNRNPK	Heterogeneous nuclear ribonucleoprotein K
302	psites	tmt	0	0.936	1.13962	0.178936	1.06669	0.16226	0.742474	0.98231	S	116	___1	LKKIIPTLEEGLQLPSPTATSQLPLESDAVE	P61978	P61978	HNRNPK	Heterogeneous nuclear ribonucleoprotein K
303	psites	tmt	0	0.839313	1.02222	0.0566932	0.857959	0.00433097	0.0493151	0.834648	S	186	___1	LVRVIRKFQEQECPPSPEPTRKEKDKKGCHC	P62070	P62070	RRAS2	Ras-related protein R-Ras2
304	psites	tmt	0	0.766211	1.22187	0.0336508	0.936206	0.291418	0.086443	0.834648	S	44	___1	LPSKETIEQEKQAGES_______________	P62328	P62328	TMSB4X	Thymosin beta-4;Hematopoietic system regulatory peptide
305	psites	tmt	0	0.972417	1.17183	0.0274254	1.13951	0.21877	0.823318	0.986664	S	209	___1	PMAYQLQLQAASNFKSPVKTIR_________	P67870	P67870	CSNK2B	Casein kinase II subunit beta
306	psites	tmt	0	0.99736	1.02569	0.16925	1.02299	0.107842	0.96909	1	S	48	___1	DGQMPSDKTIGGGDDSFNTFFSETGAGKHVP	P68363;Q9BQE3	Q9BQE3	TUBA1B;TUBA1C	Tubulin alpha-1B chain;Tubulin alpha-1C chain
307	psites	tmt	0	1.02736	0.99048	0.226741	1.01758	0.138833	0.869772	0.986664	S	332	___1	QYNQVPSEDFERTPQSPTLPPAKVAAPNLSR	P78310	P78310	CXADR	Coxsackievirus and adenovirus receptor
308	psites	tmt	0	0.989791	0.945918	0.0807402	0.936261	0.126321	0.86192	0.986664	S	293	___1	PRLILTDSGSAPTFCSDDEDVAPLSAKFADI	P78312	P78312	FAM193A	Protein FAM193A
309	psites	tmt	0	0.857406	1.16254	0.422338	0.996765	0.309337	0.594277	0.941922	S	1144	___1	SPGEHQQNSKLVLAESPQPKGKNKKNKKKKG	P78312	P78312	FAM193A	Protein FAM193A
310	psites	tmt	0	1.37674	0.877142	0.128913	1.2076	0.0202155	0.07284	0.834648	S	96	___1	NVFRDKRFGEYNSNMSPEEKMMKRFALEQQR	P78316	P78316	NOP14	Nucleolar protein 14
311	psites	tmt	0	1.11183	0.937375	0.153459	1.0422	0.174078	0.483811	0.906234	S	344	___1	FSVQSLDSRSVSEINSDDELSGKGYALVPII	P82094	P82094	TMF1	TATA element modulatory factor
312	psites	tmt	0	0.867648	1.06265	0.197143	0.92201	0.220788	0.563954	0.936012	S	401	___1	QNGFSVKSSPNPFVGSPPKGLSIQNGVKQDL	P98082	P98082	DAB2	Disabled homolog 2
313	psites	tmt	0	1.00495	1.00406	0.0451593	1.00903	0.131642	0.995593	1	S	723	___1	HTSMDLPKLASDDRPSPPRGLVAAYSGESDS	P98175	P98175	RBM10	RNA-binding protein 10
314	psites	tmt	0	1.1125	1.04371	0.15265	1.16113	0.0189925	0.254103	0.855001	S	31	___1	RSGLVPQQIKVATLNSEEESDPPTYKDAFPP	Q00341	Q00341	HDLBP	Vigilin
315	psites	tmt	0	1.17072	1.00519	0.102547	1.1768	0.167487	0.188072	0.834648	S	121	___1	SPAPPAISPIIKNAISLPQLNQAAYDSLVVG	Q00587	Q00587	CDC42EP1	Cdc42 effector protein 1
316	psites	tmt	0	0.92555	1.00112	0.0650732	0.926591	0.0562978	0.19517	0.834648	S	303	___1	PLSSSPLVRVKEEPPSPPQSPRVEEASPGRP	Q00613	Q00613	HSF1	Heat shock factor protein 1
317	psites	tmt	0	0.92429	0.815157	0.122141	0.75344	0.0657926	0.337992	0.869558	S	59	___1	DEEAGGRPAMEPGNGSLDLGGDSAGRSGAGL	Q00839	Q00839	HNRNPU	Heterogeneous nuclear ribonucleoprotein U
318	psites	tmt	0	1.23059	1.185	0.169224	1.45825	0.385351	0.621231	0.948	S	2128	___1	AESQQQWDTSKGEQVSQNGLPAEQGSPRMAE	Q01082	Q01082	SPTBN1	Spectrin beta chain, non-erythrocytic 1
319	psites	tmt	0	1.18426	0.940543	0.455038	1.11385	0.114408	0.381699	0.879147	S	2138	___1	KGEQVSQNGLPAEQGSPRMAETVDTSEMVNG	Q01082	Q01082	SPTBN1	Spectrin beta chain, non-erythrocytic 1
320	psites	tmt	0	0.918239	1.03348	0.0798426	0.94898	0.11523	0.249849	0.855001	S	2102	___1	VRRQQEEEERKRRPPSPEPSTKVSEEAESQQ	Q01082	Q01082	SPTBN1	Spectrin beta chain, non-erythrocytic 1
321	psites	tmt	0	1.02726	0.925898	0.0821123	0.951142	0.0513556	0.584969	0.937985	S	7	___1	_________MAPKRQSPLPPQKKKPRPPPAL	Q01105	Q01105	SET	Protein SET
322	psites	tmt	0	1.04551	0.934247	0.0659402	0.976764	0.0883496	0.456174	0.902495	S	26	___1	EGMTSLKVDNLTYRTSPDTLRRVFEKYGRVG	Q01130	Q01130	SRSF2	Serine/arginine-rich splicing factor 2
323	psites	tmt	0	0.912342	1.00186	0.0795232	0.914039	0.0317939	0.274336	0.855969	S	124	___1	QNTQLKRFIQELSGSSPKRRRAEDKDEGIGS	Q01664	Q01664	TFAP4	Transcription factor AP-4
324	psites	tmt	0	1.0313	1.35445	0.0363012	1.39684	0.0654468	0.465087	0.902495	S	47	___1	RLEQNGSPLGRGRLGSTGAKMQGVPLKHSGH	Q01826	Q01826	SATB1	DNA-binding protein SATB1
325	psites	tmt	0	0.756989	1.11173	0.188475	0.841569	0.0431105	0.188623	0.834648	S	750	___1	KNTNTLFSVKLEEELSVEGNTDINTDLKD__	Q01826	Q01826	SATB1	DNA-binding protein SATB1
326	psites	tmt	0	1.00507	1.00414	0.0501619	1.00923	0.0967355	0.966687	1	S	38	___1	PKGPPAKIARLEQNGSPLGRGRLGSTGAKMQ	Q01826	Q01826	SATB1	DNA-binding protein SATB1
327	psites	tmt	0	0.920798	1.08487	0.0821456	0.998942	0.125805	0.381807	0.879147	S	633	___1	PQTGPRLPPRQPTVASPAESDEENRQKTRPR	Q01826	Q01826	SATB1	DNA-binding protein SATB1
328	psites	tmt	0	1.112	0.971943	0.0648057	1.0808	0.119331	0.193291	0.834648	S	637	___1	PRLPPRQPTVASPAESDEENRQKTRPRTKIS	Q01826	Q01826	SATB1	DNA-binding protein SATB1
329	psites	tmt	0	1.05383	0.948125	0.0479745	0.99916	0.0625221	0.314628	0.858718	S	902	___1	GQSVQFTDIETLKQESPNGSRKRRSSTVAPA	Q02241	Q02241	KIF23	Kinesin-like protein KIF23
330	psites	tmt	0	0.801564	0.983771	0.0968646	0.788554	0.0678963	0.119507	0.834648	S	1552	___1	PKGKGRGAKKRKASGSENEGDYNPGRKTSKT	Q02880	Q02880	TOP2B	DNA topoisomerase 2-beta
331	psites	tmt	0	1.22379	0.819974	0.0721117	1.00347	0.118727	0.0649412	0.834648	S	1413	___1	KASPITNDGEDEFVPSDGLDKDEYTFSPGKS	Q02880	Q02880	TOP2B	DNA topoisomerase 2-beta
332	psites	tmt	0	1.01321	0.929993	0.0777625	0.942277	0.0906312	0.844201	0.986664	S	1581	___1	KTTSKKPKKTSFDQDSDVDIFPSDFPTEPPS	Q02880	Q02880	TOP2B	DNA topoisomerase 2-beta
333	psites	tmt	0	1.06663	0.851872	0.0533169	0.908629	0.0199662	0.247335	0.855001	S	1524	___1	RAPKQKKVVEAVNSDSDSEFGIPKKTTTPKG	Q02880	Q02880	TOP2B	DNA topoisomerase 2-beta
334	psites	tmt	0	1.12058	1.01782	0.0061406	1.14055	0.0262492	0.0269873	0.834648	S	1466	___1	PSYSQKSEDDSAKFDSNEEDSASVFSPSFGL	Q02880	Q02880	TOP2B	DNA topoisomerase 2-beta
335	psites	tmt	0	0.87153	1.0918	0.195142	0.951536	0.288936	0.440439	0.897566	S	1613	___1	PRTGRARKEVKYFAESDEEEDDVDFAMFN__	Q02880	Q02880	TOP2B	DNA topoisomerase 2-beta
336	psites	tmt	0	0.714315	1.08492	0.0889675	0.774975	0.345598	0.291511	0.858718	S	158	___1	CTTSLRQINKIIEQLSPQAATSRDINRKLDS	Q03468	Q03468	ERCC6	DNA excision repair protein ERCC-6
337	psites	tmt	0	0.995435	1.0044	0.273541	0.999814	0.357534	0.956303	0.998395	S	34	___1	EEAVEDPDEEDEDNTSEAENGFSLEEVLRLG	Q03701	Q03701	CEBPZ	CCAAT/enhancer-binding protein zeta
338	psites	tmt	0	1.29551	0.814194	0.208104	1.0548	0.109413	0.251706	0.855001	S	200	___1	SQPPPVAPEPGPVPSSPSQEPPTKREYDQCR	Q04323	Q04323	UBXN1	UBX domain-containing protein 1
339	psites	tmt	0	0.780728	1.21125	0.303166	0.945654	0.242777	0.394641	0.888152	S	1231	___1	RGRDAVKREAALPPVSPLKAALSEEELEKKS	Q04637	Q04637	EIF4G1	Eukaryotic translation initiation factor 4 gamma 1
340	psites	tmt	0	1.34063	0.771596	0.267779	1.03443	0.216779	0.137379	0.834648	S	1077	___1	RPIDTSRLTKITKPGSIDSNNQLFAPGGRLS	Q04637	Q04637	EIF4G1	Eukaryotic translation initiation factor 4 gamma 1
341	psites	tmt	0	0.980302	1.02228	0.076708	1.00214	0.124522	0.800977	0.986664	S	1092	___1	SIDSNNQLFAPGGRLSWGKGSSGGSGAKPSD	Q04637	Q04637	EIF4G1	Eukaryotic translation initiation factor 4 gamma 1
342	psites	tmt	0	0.944109	1.10716	0.0925801	1.04528	0.0358679	0.312678	0.858718	S	1185	___1	RGDRLDRARTPATKRSFSKEVEERSRERPSQ	Q04637	Q04637	EIF4G1	Eukaryotic translation initiation factor 4 gamma 1
343	psites	tmt	0	1.33592	1.03929	0.211375	1.38841	0.561701	0.639835	0.953677	S	1596	___1	SVTAFFKWLREAEEESDHN____________	Q04637	Q04637	EIF4G1	Eukaryotic translation initiation factor 4 gamma 1
344	psites	tmt	0	0.919112	0.9621	0.0688674	0.884277	0.0844213	0.175749	0.834648	S	203	___1	ELDHRERESSANNSVSPSESLRASEKHRGSA	Q04726	Q04726	TLE3	Transducin-like enhancer protein 3
345	psites	tmt	0	1.27978	0.88251	0.178655	1.12942	0.21089	0.341422	0.873627	S	435	___1	ESTIEQIDKKLERNLSFEIKKVPLQEGPKSF	Q05209	Q05209	PTPN12	Tyrosine-protein phosphatase non-receptor type 12
346	psites	tmt	0	0.991554	0.989705	0.122664	0.981346	0.329918	0.816593	0.986664	S	449	___1	SEKEKKEEKKPIETGSPKTKECSVEKGTGDS	Q05519	Q05519	SRSF11	Serine/arginine-rich splicing factor 11
347	psites	tmt	0	0.931947	1.09999	0.147388	1.02513	0.254171	0.581877	0.937666	S	261	___1	RGKDKKGSCNLSRVDSTTCLFPVEEKAVEYY	Q06210	Q06210	GFPT1	Glutamine--fructose-6-phosphate aminotransferase [isomerizing] 1
348	psites	tmt	0	0.996304	0.949878	0.240557	0.946367	0.0637174	0.923376	0.991803	S	222	___1	GAGTSAGNGYGNPRNSPGLLVSPGNLNKNMQ	Q06413	Q06413	MEF2C	Myocyte-specific enhancer factor 2C
349	psites	tmt	0	1.26128	1.00473	0.0931261	1.26725	0.27658	0.411763	0.896798	S	521	___1	VAEVLNDPENMEKRRSRESLNVDVVKYESGP	Q07866	Q07866	KLC1	Kinesin light chain 1
350	psites	tmt	0	0.899117	1.06701	0.1843	0.959369	0.0755921	0.340672	0.872765	S	962	___1	GDSPRIHLPLNYPPGSPDLGRHYRSNSPLPS	Q08174	Q08174	PCDH1	Protocadherin-1
351	psites	tmt	0	1.07862	0.9015	0.141125	0.972378	0.10043	0.407493	0.894197	S	984	___1	YRSNSPLPSIQLQPQSPSASKKHQVVQDLPP	Q08174	Q08174	PCDH1	Protocadherin-1
352	psites	tmt	0	0.973982	1.05686	0.236774	1.02936	0.0495594	0.947793	0.996956	S	444	___1	GLKEGMNPSYDEYADSDEDQHDAYLERMKEE	Q08945	Q08945	SSRP1	FACT complex subunit SSRP1
353	psites	tmt	0	1.12784	0.907599	0.083022	1.02363	0.06149	0.0568905	0.834648	S	5752	___1	SGSKGDLKSSKASLGSLEGEAEAEASSPKGK	Q09666	Q09666	AHNAK	Neuroblast differentiation-associated protein AHNAK
354	psites	tmt	0	1.02523	0.963345	0.248425	0.987647	0.163543	0.83815	0.986664	S	41	___1	AQRDDGVFVQEVTQNSPAARTGVVKEGDQIV	Q09666	Q09666	AHNAK	Neuroblast differentiation-associated protein AHNAK
355	psites	tmt	0	1.17443	0.965011	0.0232176	1.13334	0.119742	0.0414572	0.834648	S	177	___1	VDVTGREGAKDIDISSPEFKIKIPRHELTEI	Q09666	Q09666	AHNAK	Neuroblast differentiation-associated protein AHNAK
356	psites	tmt	0	0.51556	1.11608	0.69943	0.575404	0.578009	0.470118	0.904667	S	5830	___1	GKHGKLKFGTFGGLGSKSKGHYEVTGSDDET	Q09666	Q09666	AHNAK	Neuroblast differentiation-associated protein AHNAK
357	psites	tmt	0	0.512827	1.72171	0.400083	0.882938	0.379088	0.0910395	0.834648	S	5110	___1	FDIKSPKFKAEAPLPSPKLEGELQAPDLELS	Q09666	Q09666	AHNAK	Neuroblast differentiation-associated protein AHNAK
358	psites	tmt	0	0.935831	0.982755	0.0864804	0.919693	0.134755	0.428743	0.897566	S	5731	___1	KFNFSKPKGKGGVTGSPEASISGSKGDLKSS	Q09666	Q09666	AHNAK	Neuroblast differentiation-associated protein AHNAK
359	psites	tmt	0	0.847503	1.03795	0.102463	0.879665	0.116577	0.269752	0.855969	S	5739	___1	GKGGVTGSPEASISGSKGDLKSSKASLGSLE	Q09666	Q09666	AHNAK	Neuroblast differentiation-associated protein AHNAK
360	psites	tmt	0	0.923249	1.01172	0.0924738	0.93407	0.270115	0.47529	0.90494	S	5841	___1	GGLGSKSKGHYEVTGSDDETGKLQGSGVSLA	Q09666	Q09666	AHNAK	Neuroblast differentiation-associated protein AHNAK
361	psites	tmt	0	0.994808	0.987806	0.0785625	0.982677	0.292736	0.861938	0.986664	S	511	___1	QKPKISMQDVDLSLGSPKLKGDIKVSAPGVQ	Q09666	Q09666	AHNAK	Neuroblast differentiation-associated protein AHNAK
362	psites	tmt	0	0.917192	1.16969	0.0700653	1.07283	0.205462	0.424035	0.896798	S	135	___1	EYQRIYTTKIKPRLKSEDGVEGDLGETQSRT	Q09666	Q09666	AHNAK	Neuroblast differentiation-associated protein AHNAK
363	psites	tmt	0	0.782978	0.928201	0.0590289	0.726761	0.322429	0.370074	0.876797	S	216	___1	SGKTVIRLPSGSGAASPTGSAVDIRAGAISA	Q09666	Q09666	AHNAK	Neuroblast differentiation-associated protein AHNAK
364	psites	tmt	0	1.01119	0.965591	0.120567	0.976398	0.132082	0.907381	0.989979	S	403	___1	PAISRHSPVQMNRNLSNEELTKSKPSAPPNE	Q0JRZ9	Q0JRZ9	FCHO2	F-BAR domain only protein 2
365	psites	tmt	0	0.867275	1.08902	0.200493	0.944476	0.00756864	0.452205	0.902495	S	851	___1	RLSDGGKAGPEEPGDSPPLRHRPRGPPPPSL	Q12770	Q12770	SCAP	Sterol regulatory element-binding protein cleavage-activating protein
366	psites	tmt	0	1.59961	0.850158	0.300689	1.35992	0.206984	0.206515	0.834648	S	1405	___1	WLVKSGELTALEFSASPGLRRKLNTRPVHLH	Q12774	Q12774	ARHGEF5	Rho guanine nucleotide exchange factor 5
367	psites	tmt	0	1.18504	0.846522	0.15759	1.00316	0.198343	0.237836	0.845239	S	1068	___1	VRCPRVRKNSSTDQGSDEEGSLQKEQESAMD	Q12789	Q12789	GTF3C1	General transcription factor 3C polypeptide 1
368	psites	tmt	0	0.950938	0.993495	0.0223453	0.944752	0.0232397	0.0544879	0.834648	S	1929	___1	GNDENMSNTWKFLSHSTDSLNKISKVNESTE	Q12802	Q12802	AKAP13	A-kinase anchor protein 13
369	psites	tmt	0	0.861057	1.141	0.0960782	0.982463	0.170037	0.380975	0.879147	S	1906	___1	ANRRSQQSVSLSKSVSIQNITGVGNDENMSN	Q12802	Q12802	AKAP13	A-kinase anchor protein 13
370	psites	tmt	0	1.1689	1.03867	0.134651	1.21411	0.10446	0.321335	0.858718	S	117	___1	KAIEPQKEEADENYNSVNTRMRKTQHGVLSQ	Q12846	Q12846	STX4	Syntaxin-4
371	psites	tmt	0	1.0178	1.05033	0.0803951	1.06902	0.206518	0.96054	0.999803	S	1618	___1	GPYEAVTPLTKAADISLDNLVEGKRKRRSNV	Q12888	Q12888	TP53BP1	Tumor suppressor p53-binding protein 1
372	psites	tmt	0	1.1391	0.884309	0.2248	1.00732	0.470174	0.90219	0.989979	S	630	___1	VCIDLTCDSGSQAVPSPATRSEALSSVLDQE	Q12888	Q12888	TP53BP1	Tumor suppressor p53-binding protein 1
373	psites	tmt	0	0.965128	1.01237	0.0689052	0.977066	0.125656	0.742532	0.98231	S	552	___1	DEDGENTQIEDTEPMSPVLNSKFVPAENDSI	Q12888	Q12888	TP53BP1	Tumor suppressor p53-binding protein 1
374	psites	tmt	0	1.03565	1.01981	0.101896	1.05616	0.050245	0.52915	0.930181	S	1028	___1	GERKNGSTAVAESVASPQKTMSVLSCICEAR	Q12888	Q12888	TP53BP1	Tumor suppressor p53-binding protein 1
375	psites	tmt	0	1.10165	0.882837	0.170508	0.972575	0.198263	0.562199	0.936012	S	500	___1	LTVECSKTSEIEPKNSPEDLGLSLTGDSCKL	Q12888	Q12888	TP53BP1	Tumor suppressor p53-binding protein 1
376	psites	tmt	0	0.833505	1.19547	0.301899	0.996427	0.184481	0.456647	0.902495	S	1462	___1	TRRTDVGAGALRRSDSPEIPFQAAAGPSDGL	Q12888	Q12888	TP53BP1	Tumor suppressor p53-binding protein 1
377	psites	tmt	0	0.768272	1.07992	0.209821	0.829673	0.254666	0.371806	0.879147	S	265	___1	KEQNPPPARSEDMPFSPKASVAAMEAKEQLS	Q12888	Q12888	TP53BP1	Tumor suppressor p53-binding protein 1
378	psites	tmt	0	0.864413	1.11815	0.109399	0.96654	0.0692366	0.128273	0.834648	S	366	___1	VQDSLSTNSSDLVAPSPDAFRSTPFIVPSSP	Q12888	Q12888	TP53BP1	Tumor suppressor p53-binding protein 1
379	psites	tmt	0	1.20185	0.831933	0.102541	0.999861	0.0861177	0.0744218	0.834648	S	380	___1	PSPDAFRSTPFIVPSSPTEQEGRQDKPMDTS	Q12888	Q12888	TP53BP1	Tumor suppressor p53-binding protein 1
380	psites	tmt	0	0.835757	1.15302	0.161647	0.963641	0.230557	0.204604	0.834648	S	382	___1	ITPMKRPMEEDGEEKSPSKKKKKIQKKEEKA	Q12906	Q12906	ILF3	Interleukin enhancer-binding factor 3
381	psites	tmt	0	1.03037	1.0112	0.133306	1.04191	0.163148	0.844666	0.986664	S	72	___1	SPQLSARSQGGGDGVSPTPPEGLAPGVEAGK	Q12979	Q12979	ABR	Active breakpoint cluster region-related protein
382	psites	tmt	0	0.791343	1.09652	0.198543	0.867723	0.114153	0.297466	0.858718	S	1218	___1	PVETWKGGIDNPAITSDQELDDKKMKKKTHK	Q13017	Q13017	ARHGAP5	Rho GTPase-activating protein 5
383	psites	tmt	0	1.02887	1.00608	0.241108	1.03513	0.0897583	0.722525	0.975225	S	229	___1	SVETKNLEQILNGGESPKQKGQEIKRSSGDV	Q13033	Q13033	STRN3	Striatin-3
384	psites	tmt	0	0.97409	1.0412	0.365078	1.01422	0.519082	0.823785	0.986664	S	257	___1	GDVLETFNFLENADDSDEDEENDMIEGIPEG	Q13033	Q13033	STRN3	Striatin-3
385	psites	tmt	0	0.688949	1.26436	0.153533	0.871078	0.0472143	0.0843529	0.834648	S	25	___1	PLELNQHSRFIIGSVSEDNSEDEISNLVKLD	Q13085	Q13085	ACACA	Acetyl-CoA carboxylase 1;Biotin carboxylase
386	psites	tmt	0	1.0192	1.13219	0.155965	1.15393	0.256258	0.982891	1	S	29	___1	NQHSRFIIGSVSEDNSEDEISNLVKLDLLEE	Q13085	Q13085	ACACA	Acetyl-CoA carboxylase 1;Biotin carboxylase
387	psites	tmt	0	0.895459	1.09524	0.137002	0.980739	0.250693	0.412859	0.896798	S	474	___1	VLRNQIHVKSPPREGSQGELTPANSQSRMST	Q13098	Q13098	GPS1	COP9 signalosome complex subunit 1
388	psites	tmt	0	1.12845	0.978028	0.141569	1.10366	0.134176	0.254335	0.855001	S	668	___1	TEQRAEEIESRVGSGSLDNLGRFRSMSSIPP	Q13136	Q13136	PPFIA1	Liprin-alpha-1
389	psites	tmt	0	0.941127	1.04785	0.39924	0.986158	0.277387	0.922293	0.991803	S	174	___1	LNVKAVSETPAVPPVSEDEDDDDDDATPPPV	Q13153	Q13153	PAK1	Serine/threonine-protein kinase PAK 1
390	psites	tmt	0	0.621873	1.44258	0.31721	0.897101	0.365089	0.171376	0.834648	S	141	___1	VLKFYDSNTVKQKYLSFTPPEKDGFPSGTPA	Q13177	Q13177	PAK2	Serine/threonine-protein kinase PAK 2;PAK-2p27;PAK-2p34
391	psites	tmt	0	0.962799	1.03517	0.0915116	0.996664	0.104263	0.602037	0.941922	S	93	___1	NSQKAGKEKDGTKRKSLSDSESDDSKSKKKR	Q13185	Q13185	CBX3	Chromobox protein homolog 3
392	psites	tmt	0	0.89135	1.0583	0.112786	0.943312	0.172055	0.275682	0.855969	S	95	___1	QKAGKEKDGTKRKSLSDSESDDSKSKKKRDA	Q13185	Q13185	CBX3	Chromobox protein homolog 3
393	psites	tmt	0	0.922122	0.822668	0.231226	0.758601	0.181367	0.664476	0.960733	S	176	___1	PQIVIAFYEERLTWHSCPEDEAQ________	Q13185	Q13185	CBX3	Chromobox protein homolog 3
394	psites	tmt	0	0.944248	0.983201	0.206919	0.928386	0.0228829	0.782696	0.986664	S	211	___1	RSGSRGRDSPYQSRGSPHYFSPFRPY_____	Q13242	Q13242	SRSF9	Serine/arginine-rich splicing factor 9
395	psites	tmt	0	0.97752	1.00808	0.125386	0.985418	0.272034	0.775424	0.986664	S	303	___1	DIKSKSRSRSQSRSNSPLPVPPSKARSVSPP	Q13247	Q13247	SRSF6	Serine/arginine-rich splicing factor 6
396	psites	tmt	0	1.25817	0.901998	0.11252	1.13486	0.0069502	0.100324	0.834648	S	594	___1	MALAEGPGAEGPRLASPSGSTSSGLEVVAPE	Q13263	Q13263	TRIM28	Transcription intermediary factor 1-beta
397	psites	tmt	0	0.785304	0.929036	0.118141	0.729576	0.146215	0.0866323	0.834648	S	501	___1	PRVSLERLDLDLTADSQPPVFKVFPGSTTED	Q13263	Q13263	TRIM28	Transcription intermediary factor 1-beta
398	psites	tmt	0	1.01539	0.927486	0.0781327	0.941763	0.0194519	0.796993	0.986664	S	757	___1	LIRARLQEKLSPPYSSPQEFAQDVGRMFKQF	Q13263	Q13263	TRIM28	Transcription intermediary factor 1-beta
399	psites	tmt	0	0.943428	1.17136	0.224554	1.10509	0.223141	0.723984	0.976135	S	50	___1	APSAAASASASAAASSPAGGGAEALELLEHC	Q13263	Q13263	TRIM28	Transcription intermediary factor 1-beta
400	psites	tmt	0	1.10381	0.988612	0.0502047	1.09124	0.0273929	0.013498	0.73174	S	232	___1	PVLEETAPEDAQKSSSPAPADIAQTVQEDLR	Q13283	Q13283	G3BP1	Ras GTPase-activating protein-binding protein 1
401	psites	tmt	0	0.947643	0.985174	0.237562	0.933593	0.15788	0.771619	0.986664	S	149	___1	QDEVFGGFVTEPQEESEEEVEEPEERQQTPE	Q13283	Q13283	G3BP1	Ras GTPase-activating protein-binding protein 1
402	psites	tmt	0	1.17064	0.684394	0.445079	0.801178	0.34257	0.634961	0.950873	S	12	___1	____MGGCAGSRRRFSDSEGEETVPEPRLPL	Q13286	Q13286	CLN3	Battenin
403	psites	tmt	0	1.21708	0.931778	0.19068	1.13405	0.0993984	0.315127	0.858718	S	14	___1	__MGGCAGSRRRFSDSEGEETVPEPRLPLLD	Q13286	Q13286	CLN3	Battenin
404	psites	tmt	0	0.798783	1.09404	0.196615	0.873898	0.257381	0.283621	0.855969	S	522	___1	AIKAECTARLPEASQSPLVLKQAVRKPLEAV	Q13330	Q13330	MTA1	Metastasis-associated protein MTA1
405	psites	tmt	0	0.996533	1.27745	0.136897	1.27302	0.293119	0.871586	0.986664	S	576	___1	SSLTPAKVAPVINNGSPTILGKRSYEQHNGV	Q13330	Q13330	MTA1	Metastasis-associated protein MTA1
406	psites	tmt	0	1.00235	0.944452	0.119512	0.946671	0.148607	0.997082	1	S	687	___1	NSSNNSREKKADRDQSPFSKIKQSSQDNELK	Q13427	Q13427	PPIG	Peptidyl-prolyl cis-trans isomerase G
407	psites	tmt	0	0.800045	0.965843	0.122981	0.772718	0.0510249	0.145049	0.834648	S	696	___1	KADRDQSPFSKIKQSSQDNELKSSMLKNKED	Q13427	Q13427	PPIG	Peptidyl-prolyl cis-trans isomerase G
408	psites	tmt	0	1.00762	1.01117	0.124538	1.01888	0.06989	0.928473	0.992868	S	716	___1	LKSSMLKNKEDEKIRSSVEKENQKSKGQEND	Q13427	Q13427	PPIG	Peptidyl-prolyl cis-trans isomerase G
409	psites	tmt	0	0.982705	1.00606	0.117996	0.988664	0.115241	0.896006	0.989261	S	717	___1	KSSMLKNKEDEKIRSSVEKENQKSKGQENDH	Q13427	Q13427	PPIG	Peptidyl-prolyl cis-trans isomerase G
410	psites	tmt	0	0.998324	0.984572	0.22607	0.982922	0.0531576	0.895436	0.98915	S	1350	___1	KESSRKGWESRKRKLSGDQPAARTPRSKKKK	Q13428	Q13428	TCOF1	Treacle protein
411	psites	tmt	0	0.987912	1.02602	0.0290522	1.01362	0.0627422	0.760174	0.98551	S	1378	___1	KKKKLGAGEGGEASVSPEKTSTTSKGKAKRD	Q13428	Q13428	TCOF1	Treacle protein
412	psites	tmt	0	0.942454	1.16898	0.068813	1.10171	0.0701628	0.355883	0.874972	S	156	___1	HPATGKTVANLLSGKSPRKSAEPSANTTLVS	Q13428	Q13428	TCOF1	Treacle protein
413	psites	tmt	0	1.02178	0.970203	0.147189	0.99133	0.155368	0.903101	0.989979	S	307	___1	EEEEMETDARSSLGQSASETEEDTVSVSKKE	Q13435	Q13435	SF3B2	Splicing factor 3B subunit 2
414	psites	tmt	0	0.944522	1.02646	0.0528851	0.96951	0.103581	0.424239	0.896798	S	309	___1	EEMETDARSSLGQSASETEEDTVSVSKKEKN	Q13435	Q13435	SF3B2	Splicing factor 3B subunit 2
415	psites	tmt	0	0.965769	0.834847	0.176614	0.806269	0.0727082	0.854115	0.986664	S	63	___1	AGDPKKEKKSLDSDESEDEEDDYQQKRKGVE	Q13442	Q13442	PDAP1	28 kDa heat- and acid-stable phosphoprotein
416	psites	tmt	0	0.998633	1.09754	0.122819	1.09604	0.238054	0.955776	0.998395	S	178	___1	AKDDATLSGKRMQSLSLNK____________	Q13442	Q13442	PDAP1	28 kDa heat- and acid-stable phosphoprotein
417	psites	tmt	0	1.13742	0.915213	0.046191	1.04098	0.0566248	0.0377633	0.834648	S	1290	___1	KSKPCGSPRVQEKPDSPGGSTQIQRYLDAER	Q13459	Q13459	MYO9B	Unconventional myosin-IXb
418	psites	tmt	0	1.50822	0.781052	0.394762	1.178	0.0273162	0.154252	0.834648	S	393	___1	GVQMQAIPEDAIPEESGDEDEDDPDKRISIC	Q13547	Q13547	HDAC1	Histone deacetylase 1
419	psites	tmt	0	1.14905	1.23862	0.580103	1.42323	0.408172	0.645485	0.954394	S	351	___1	TSPHLGRRRPLLRSMSAAFCSLLAPERQVGR	Q13671	Q13671	RIN1	Ras and Rab interactor 1
420	psites	tmt	0	0.88172	0.922386	0.072722	0.813286	0.0428335	0.171383	0.834648	S	1323	___1	EDLQEKCTELNQAWSSLGKRADQRKAKLGDS	Q13813	Q13813	SPTAN1	Spectrin alpha chain, non-erythrocytic 1
421	psites	tmt	0	0.965904	0.957871	0.0692932	0.925211	0.11961	0.66702	0.960733	S	1217	___1	VATFNSIKELNERWRSLQQLAEERSQLLGSA	Q13813	Q13813	SPTAN1	Spectrin alpha chain, non-erythrocytic 1
422	psites	tmt	0	0.801678	1.0461	0.318576	0.838631	0.149721	0.373748	0.879147	S	87	___1	AGAGHPGAGGAQPPDSPAGVRTAFTDLPEQV	Q13884	Q13884	SNTB1	Beta-1-syntrophin
423	psites	tmt	0	1.27683	0.855618	0.125232	1.09248	0.105527	0.0604714	0.834648	S	219	___1	GSPVSEIGWETPPPESPRLGGSTSDPPSSQS	Q13884	Q13884	SNTB1	Beta-1-syntrophin
424	psites	tmt	0	1.34364	0.909877	0.243247	1.22255	0.166363	0.285538	0.855969	S	98	___1	RERTTRLGPRMPQDGSDDEDEEWPTLEKAAT	Q13895	Q13895	BYSL	Bystin
425	psites	tmt	0	1.01347	0.88842	0.0238425	0.900391	0.0864032	0.871181	0.986664	S	383	___1	PSYSRHSSYERGGDVSPSPYSSSSWRRSRSP	Q14004	Q14004	CDK13	Cyclin-dependent kinase 13
426	psites	tmt	0	0.682491	1.09068	0.0300977	0.744381	0.349165	0.244012	0.855001	S	703	___1	GGMAKEATMKGSSSASIVKGQHEMSEMDGRW	Q14126	Q14126	DSG2	Desmoglein-2
427	psites	tmt	0	0.968486	1.059	0.141185	1.02563	0.143279	0.765914	0.98551	S	680	___1	EDKVVPSFLPVDQGGSLVGRNGVGGMAKEAT	Q14126	Q14126	DSG2	Desmoglein-2
428	psites	tmt	0	0.734101	1.33408	0.302519	0.979348	0.183487	0.12704	0.834648	S	52	___1	VASALSSHRTGPPPISPSKRKFSMEPGDEDL	Q14135	Q14135	VGLL4	Transcription cofactor vestigial-like protein 4
429	psites	tmt	0	1.11417	0.912896	0.089206	1.01712	0.090599	0.136888	0.834648	S	518	___1	LFPNVLLMLSASPRMSGFIYQGKLPTTGMTI	Q14155	Q14155	ARHGEF7;ARHGEF6	Rho guanine nucleotide exchange factor 7;Rho guanine nucleotide exchange factor 6
430	psites	tmt	0	0.900801	1.06251	0.115769	0.957112	0.183392	0.442618	0.897566	S	694	___1	LSVPYVPQVTDEDRLSRRKSIVDTVSIQVDI	Q14156	Q14156	EFR3A	Protein EFR3 homolog A
431	psites	tmt	0	1.40812	0.775422	0.406431	1.09189	0.291075	0.222352	0.835963	S	853	___1	ERRGGGLRLPLLPPESPGPLRQRHVACLARS	Q14160	Q14160	SCRIB	Protein scribble homolog
432	psites	tmt	0	1.17308	1.07709	0.103117	1.26352	0.172898	0.257467	0.855001	S	1437	___1	TLGEEEQEDEQPPWASPSPTSRQSPASPPPL	Q14160	Q14160	SCRIB	Protein scribble homolog
433	psites	tmt	0	1.96095	0.82087	0.0952749	1.60969	0.213788	0.0102294	0.73174	S	1581	___1	SPDFAEELRSLEPSPSPGPQEEDGEVALVLL	Q14160	Q14160	SCRIB	Protein scribble homolog
434	psites	tmt	0	0.931477	1.26768	0.215564	1.18081	0.0925415	0.748504	0.98231	S	1285	___1	ALAAVPSAGSVQRVPSGAAGGKMAESPCSPS	Q14160	Q14160	SCRIB	Protein scribble homolog
435	psites	tmt	0	0.71502	1.01335	0.0798869	0.724564	0.213372	0.167019	0.834648	S	23	___1	IEANGELKVFIDQNLSPGKGVVSLVAVHPST	Q14186	Q14186	TFDP1	Transcription factor Dp-1
436	psites	tmt	0	0.926168	1.10436	0.0786038	1.02283	0.0534426	0.164659	0.834648	S	315	___1	RENVLFLTSGTRRAVSPSNPKARQPARSRLW	Q14244	Q14244	MAP7	Ensconsin
437	psites	tmt	0	0.979595	1.02596	0.0521655	1.00502	0.0645502	0.633277	0.950799	S	202	___1	LSKYVDPVISKRLSSSSATLLNSPDRARRLQ	Q14244	Q14244	MAP7	Ensconsin
438	psites	tmt	0	1.05932	0.942476	0.144639	0.998382	0.0431355	0.618905	0.948	S	209	___1	VISKRLSSSSATLLNSPDRARRLQLSPWESS	Q14244	Q14244	MAP7	Ensconsin
439	psites	tmt	0	0.929083	0.945553	0.056808	0.878497	0.120716	0.503813	0.913915	S	100	___1	PPADVWTPPARASAPSPNAQVACDHCLKEAA	Q14258	Q14258	TRIM25	E3 ubiquitin/ISG15 ligase TRIM25
440	psites	tmt	0	1.01308	0.984092	0.084047	0.996965	0.311037	0.907743	0.989979	S	136	___1	SRRRSRSKSPFRKDKSPVREPIDNLTPEERD	Q14498	Q14498	RBM39	RNA-binding protein 39
441	psites	tmt	0	0.995351	0.957661	0.0213127	0.953209	0.0878616	0.899664	0.989979	S	97	___1	SRSRSRDRRFRGRYRSPYSGPKFNSAIRGKI	Q14498	Q14498	RBM39	RNA-binding protein 39
442	psites	tmt	0	1.01404	0.90596	0.260181	0.918684	0.297879	0.956011	0.998395	S	2670	___1	KRRQRLGFVDVQNCISR______________	Q14573	Q14573	ITPR3	Inositol 1,4,5-trisphosphate receptor type 3
443	psites	tmt	0	0.979949	1.13336	0.186809	1.11064	0.0644672	0.92899	0.992868	S	168	___1	VQGETQPQRLLLAEDSEEEVDFLSERRMVKK	Q14676	Q14676	MDC1	Mediator of DNA damage checkpoint protein 1
444	psites	tmt	0	1.24179	0.794827	0.510555	0.987005	0.184227	0.357484	0.874972	S	144	___1	LPFLTIPENRQLPPPSPQLPKHNLHVTKTLM	Q14678	Q14678	KANK1	KN motif and ankyrin repeat domain-containing protein 1
445	psites	tmt	0	1.05422	0.97921	0.0885394	1.0323	0.204342	0.726854	0.977557	S	325	___1	AASQINVCGVRKRSYSAGNASQLEQLSRARR	Q14678	Q14678	KANK1	KN motif and ankyrin repeat domain-containing protein 1
446	psites	tmt	0	0.910041	1.1627	0.137136	1.0581	0.333187	0.69321	0.9695	S	356	___1	QASATPFTDIKSNNWSLEDVTASDKNYVAGL	Q14680	Q14680	MELK	Maternal embryonic leucine zipper kinase
447	psites	tmt	0	0.766584	1.18669	0.178607	0.909695	0.0553957	0.0728333	0.834648	S	245	___1	ETMEEQKTKVGDGDLSAEEIPENEVSLRRAV	Q14684	Q14684	RRP1B	Ribosomal RNA processing protein 1 homolog B
448	psites	tmt	0	0.744564	1.12047	0.270877	0.834264	0.316319	0.195584	0.834648	S	576	___1	NHSVNEEEQEEQGEGSEDEWEQVGPRNKTSV	Q14694	Q14694	USP10	Ubiquitin carboxyl-terminal hydrolase 10
449	psites	tmt	0	0.891842	1.19142	0.284447	1.06255	0.299738	0.572122	0.936012	S	211	___1	FMGDMPPSVTPRTCNSPQNSTDSVSDIVPDS	Q14694	Q14694	USP10	Ubiquitin carboxyl-terminal hydrolase 10
450	psites	tmt	0	0.884628	1.0697	0.107244	0.946287	0.106272	0.149911	0.834648	S	99	___1	SRSPGRPPKSARRSASASHQADIKEARREVE	Q14739	Q14739	LBR	Lamin-B receptor
451	psites	tmt	0	1.19368	0.700543	0.0541599	0.836223	0.00625261	0.0439937	0.834648	S	873	___1	LGRRVASGPSPGEGISPQSAQAPQAPGDNHV	Q14764	Q14764	MVP	Major vault protein
452	psites	tmt	0	0.976125	0.925527	0.0591316	0.90343	0.111568	0.795605	0.986664	S	231	___1	ACPSPVGNGYVSARASPGLLPVANGNSLNKV	Q14814	Q14814	MEF2D	Myocyte-specific enhancer factor 2D
453	psites	tmt	0	1.02985	1.01861	0.0930156	1.04902	0.0329455	0.538342	0.935341	S	1535	___1	ELAEVEENKKMSQPGSPSPKTPTPSTPGDTQ	Q14839	Q14839	CHD4	Chromodomain-helicase-DNA-binding protein 4
454	psites	tmt	0	1.32289	0.918136	0.0647176	1.21459	0.150966	0.142123	0.834648	S	1401	___1	DVSSSKPSIKAVIVSSPKAKATVSKTENQKS	Q14966	Q14966	ZNF638	Zinc finger protein 638
455	psites	tmt	0	1.09604	1.03892	0.0560083	1.1387	0.104991	0.204636	0.834648	S	698	___1	RGGSISVQVNSIKFDSE______________	Q14978	Q14978	NOLC1	Nucleolar and coiled-body phosphoprotein 1
456	psites	tmt	0	0.926545	1.02075	0.0694307	0.945772	0.209351	0.529021	0.930181	S	538	___1	DDSSEEEEEKLKGKGSPRPQAPKANGTSALT	Q14978	Q14978	NOLC1	Nucleolar and coiled-body phosphoprotein 1
457	psites	tmt	0	0.967514	1.1623	0.0944862	1.12454	0.0597376	0.600253	0.941922	S	643	___1	VREEEIEVDSRVADNSFDAKRGAAGDWGERA	Q14978	Q14978	NOLC1	Nucleolar and coiled-body phosphoprotein 1
458	psites	tmt	0	0.935204	1.05111	0.13459	0.983006	0.112826	0.553107	0.936012	S	169	___1	APVPSTCSSTFPEELSPPSHQAKREIRFLEL	Q14980	Q14980	NUMA1	Nuclear mitotic apparatus protein 1
459	psites	tmt	0	0.92615	1.0566	0.0932091	0.978575	0.327438	0.519145	0.929868	S	1757	___1	PRTQPDGTSVPGEPASPISQRLPPKVESLES	Q14980	Q14980	NUMA1	Nuclear mitotic apparatus protein 1
460	psites	tmt	0	0.810482	1.05842	0.164281	0.857833	0.0785733	0.253852	0.855001	S	281	___1	QALISRLQWDGSSDLSPSDSGSSKTSENQGW	Q14CW9	Q14CW9	ATXN7L3	Ataxin-7-like protein 3
461	psites	tmt	0	1.0302	1.02276	0.146769	1.05365	0.0984799	0.710647	0.972247	S	306	___1	GFHREGNTTEDDFPSSPGNGNKSSNSSEERT	Q15007	Q15007	WTAP	Pre-mRNA-splicing regulator WTAP
462	psites	tmt	0	1.07466	0.961652	0.118497	1.03345	0.0983154	0.369255	0.876797	S	218	___1	IEEHNIKIYHLPDAESDEDEDFKEQTRLLKA	Q15019	Q15019	37500	Septin-2
463	psites	tmt	0	1.15293	0.886698	0.169431	1.0223	0.131403	0.317442	0.858718	S	307	___1	KVLQKEKKRGKRVALSDDETKETENMRKKRR	Q15054	Q15054	POLD3	DNA polymerase delta subunit 3
464	psites	tmt	0	0.970381	1.07548	0.0570541	1.04363	0.1576	0.660283	0.959957	S	263	___1	TTTPTTSAITASRSESPPPLSDPKQAKVVAR	Q15059	Q15059	BRD3	Bromodomain-containing protein 3
465	psites	tmt	0	0.938039	1.0445	0.0371915	0.97978	0.0362693	0.223906	0.835963	S	77	___1	CTCLAWAPARLQAKESPQRKKRKSEAVGMSN	Q15061	Q15061	WDR43	WD repeat-containing protein 43
466	psites	tmt	0	1.19359	1.03543	0.12534	1.23588	0.0952379	0.0664615	0.834648	S	116	___1	RIPSAKKYKDIIRQPSEEEIIKLAPPPKKA_	Q15121	Q15121	PEA15	Astrocytic phosphoprotein PEA-15
467	psites	tmt	0	0.906596	0.833128	0.206361	0.755311	0.314731	0.555623	0.936012	S	4374	___1	YRAGTLSITEFADMLSGNAGGFRSRSSSVGS	Q15149	Q15149	PLEC	Plectin
468	psites	tmt	0	1.20696	0.862778	0.0968141	1.04134	0.0617413	0.145051	0.834648	S	4382	___1	TEFADMLSGNAGGFRSRSSSVGSSSSYPISP	Q15149	Q15149	PLEC	Plectin
469	psites	tmt	0	0.90864	1.25082	0.316328	1.13654	0.324876	0.745614	0.98231	S	1435	___1	ELQLVTYKAQLEPVASPAKKPKVQSGSESVI	Q15149	Q15149	PLEC	Plectin
470	psites	tmt	0	1.02876	0.964526	0.0416981	0.992262	0.0915674	0.618368	0.948	S	173	___1	CVKQICLVMLETLSQSPQGRVMTIPYQPMPA	Q15365	Q15365	PCBP1	Poly(rC)-binding protein 1
471	psites	tmt	0	1.08379	0.975559	0.0495946	1.0573	0.0578168	0.142473	0.834648	S	190	___1	QGRVMTIPYQPMPASSPVICAGGQDRCSDAA	Q15365	Q15365	PCBP1	Poly(rC)-binding protein 1
472	psites	tmt	0	1.11733	0.984323	0.0321581	1.09982	0.123168	0.155434	0.834648	S	119	___1	QDDLLFFEKAPSRQISLPDLSQEEPQLKTPA	Q15390	Q15390	MTFR1	Mitochondrial fission regulator 1
473	psites	tmt	0	0.763882	0.979264	0.0434064	0.748041	0.0127469	0.0138653	0.73174	S	604	___1	SQDRKSASREKRSVVSFDKVKEPRKSRDSES	Q15424	Q15424	SAFB	Scaffold attachment factor B1
474	psites	tmt	0	1.10905	0.934258	0.0498044	1.03614	0.112415	0.222973	0.835963	S	329	___1	YEKFGESEEVEMEVESDEEDDKQEKAEEPPS	Q15459	Q15459	SF3A1	Splicing factor 3A subunit 1
475	psites	tmt	0	1.00562	0.974806	0.0573172	0.980286	0.0890323	0.943867	0.996956	S	256	___1	TVSASPCSAPLARASSLEDLVLKEASTAVST	Q15477	Q15477	SKIV2L	Helicase SKI2W
476	psites	tmt	0	0.666526	0.97571	0.707984	0.650336	0.538974	0.667188	0.960733	S	699	___1	KEKHKILHRLLQDSSSPVDLAKLTAEATGKD	Q15596	Q15596	NCOA2	Nuclear receptor coactivator 2
477	psites	tmt	0	0.765589	1.29748	0.173001	0.993339	0.157787	0.25111	0.855001	S	365	___1	TENGVNGTLTSNVADSPRNKKEKSS______	Q15629	Q15629	TRAM1	Translocating chain-associated membrane protein 1
478	psites	tmt	0	1.37575	0.923834	0.244603	1.27096	0.335849	0.414242	0.896798	S	482	___1	WLAEAESRVLSNRGDSLSRHARPPDPPASAP	Q15642	Q15642	TRIP10	Cdc42-interacting protein 4
479	psites	tmt	0	1.00905	1.05676	0.0937671	1.06633	0.0459159	0.832372	0.986664	S	238	___1	RAEGPPRLAIQGPEDSPSRQSRRYDW_____	Q15773	Q15773	MLF2	Myeloid leukemia factor 2
480	psites	tmt	0	1.02209	0.999775	0.118026	1.02186	0.137669	0.832421	0.986664	S	259	___1	PVSLANTQPRGPPASSPAPAPKFSPVTPKFT	Q15942	Q15942	ZYX	Zyxin
481	psites	tmt	0	1.0393	1.03676	0.0572523	1.0775	0.170459	0.762799	0.98551	S	308	___1	NQKLGHPEALSAGTGSPQPPSFTYAQQREKP	Q15942	Q15942	ZYX	Zyxin
482	psites	tmt	0	0.938119	0.821668	0.464219	0.770822	0.434413	0.901386	0.989979	S	344	___1	QHPVPPPAQNQNQVRSPGAPGPLTLKEVEEL	Q15942	Q15942	ZYX	Zyxin
483	psites	tmt	0	1.21423	0.926887	0.108902	1.12546	0.00219277	0.125182	0.834648	S	244	___1	RILQEKLDQPVSAPPSPRDISMEIDSPENMM	Q16204	Q16204	CCDC6	Coiled-coil domain-containing protein 6
484	psites	tmt	0	0.87489	1.16828	0.10926	1.02212	0.13446	0.174734	0.834648	S	562	___1	DISVEKLNLGTDSDSSPQKSSRDPPSSPSSL	Q16512	Q16512	PKN1	Serine/threonine-protein kinase N1
485	psites	tmt	0	1.04668	0.943487	0.0317012	0.987527	0.130352	0.569418	0.936012	S	51	___1	AVVKIPGTPGAGGRLSPENNQVLTKKKLQDL	Q16514	Q16514	TAF12	Transcription initiation factor TFIID subunit 12
486	psites	tmt	0	1.21258	0.676149	0.652323	0.819887	0.251663	0.632603	0.95048	S	507	___1	ISMPLDFKHRITVQASPGLDRRRNVFEVGPG	Q16584	Q16584	MAP3K11	Mitogen-activated protein kinase kinase kinase 11
487	psites	tmt	0	1.06282	0.90533	0.0899725	0.962201	0.213484	0.738923	0.98231	S	524	___1	GLDRRRNVFEVGPGDSPTFPRFRAIQLEPAE	Q16584	Q16584	MAP3K11	Mitogen-activated protein kinase kinase kinase 11
488	psites	tmt	0	1.1402	0.994704	0.0973179	1.13416	0.0207035	0.0820956	0.834648	S	28	___1	PEQEDSVLFRRGTGQSDDSDIWDDTALIKAY	Q16637	Q16637	SMN1	Survival motor neuron protein
489	psites	tmt	0	0.842083	1.12077	0.165276	0.943781	0.0266873	0.29926	0.858718	S	31	___1	EDSVLFRRGTGQSDDSDIWDDTALIKAYDKA	Q16637	Q16637	SMN1	Survival motor neuron protein
490	psites	tmt	0	2.42294	0.596304	0.758825	1.44481	0.517208	0.301211	0.858718	S	304	___1	TSPAGKKRYVAAAFPSACGKTNLAMMRPALP	Q16822	Q16822	PCK2	Phosphoenolpyruvate carboxykinase [GTP], mitochondrial
491	psites	tmt	0	0.896087	1.12092	0.323346	1.00444	0.513588	0.598854	0.941922	S	161	___1	EQGLGKREEDEPEERSGDETPGSEVPGDKAA	Q1KMD3	Q1KMD3	HNRNPUL2	Heterogeneous nuclear ribonucleoprotein U-like protein 2
492	psites	tmt	0	0.973705	1.01461	0.0270379	0.987927	0.0972828	0.588073	0.941184	S	1305	___1	KPINKGRKRAAVGQESPGGLEAGNAKAPKLQ	Q29RF7	Q29RF7	PDS5A	Sister chromatid cohesion protein PDS5 homolog A
493	psites	tmt	0	0.878888	1.05073	0.143577	0.923473	0.149621	0.340322	0.872765	S	2755	___1	EPTCKVVFENEQDNSSLTKTQRKRSLVTSEP	Q2LD37	Q2LD37	KIAA1109	Uncharacterized protein KIAA1109
494	psites	tmt	0	1.06702	0.987305	0.211394	1.05348	0.398834	0.898403	0.989979	S	351	___1	LAACRVSPATPGPALSDILRSVQRARTPSGP	Q2M2I3	Q2M2I3	FAM83E	Protein FAM83E
495	psites	tmt	0	0.984003	1.11391	0.188977	1.09609	0.1647	0.920878	0.991803	S	508	___1	RAWGLQEIRDCLIEDSDDEAGQS________	Q2VPK5	Q2VPK5	CTU2	Cytoplasmic tRNA 2-thiolation protein 2
496	psites	tmt	0	0.809174	1.12852	0.0985299	0.913165	0.361706	0.46391	0.902495	S	120	___1	AATLASLGGTSSRRGSGDTSISIDTEASIRE	Q32MZ4	Q32MZ4	LRRFIP1	Leucine-rich repeat flightless-interacting protein 1
497	psites	tmt	0	0.997274	1.01793	0.131575	1.01515	0.0977147	0.999434	1	S	176	___1	SPSERPRQKLSRKAISSANLLVRSGSTESRG	Q32P44	Q32P44	EML3	Echinoderm microtubule-associated protein-like 3
498	psites	tmt	0	1.03524	0.952573	0.0715953	0.986139	0.0131254	0.558241	0.936012	S	460	___1	ASPRARLSASTASELSPKSKARPSSPSTSWH	Q3KQU3	Q3KQU3	MAP7D1	MAP7 domain-containing protein 1
499	psites	tmt	0	0.99527	0.980078	0.21707	0.975443	0.184104	0.995316	1	S	645	___1	PLRPHPPDPQAPQRRSAPELPEGILKGGSLP	Q3KR16	Q3KR16	PLEKHG6	Pleckstrin homology domain-containing family G member 6
500	psites	tmt	0	1.05773	1.07755	0.0953937	1.13976	0.249821	0.800052	0.986664	S	194	___1	LQRSQAQQPQKEAALSS______________	Q3MHD2	Q3MHD2	LSM12	Protein LSM12 homolog
501	psites	tmt	0	0.906314	1.19161	0.216554	1.07997	0.180841	0.579522	0.936474	S	506	___1	ASQGPGGGGRLLRQASLDGLQQLRDNMGSRR	Q3MII6	Q3MII6	TBC1D25	TBC1 domain family member 25
502	psites	tmt	0	1.11712	0.877838	0.012164	0.98065	0.104022	0.146846	0.834648	S	678	___1	PGLKSRGSRAAGGAPSPPPPVRRASAGPAPG	Q4KMP7	Q4KMP7	TBC1D10B	TBC1 domain family member 10B
503	psites	tmt	0	0.971075	0.981708	0.198769	0.953312	0.237531	0.861452	0.986664	S	241	___1	SAPEPRAGPANRLAGSPPGSGQWKPKVESGD	Q4KMQ1	Q4KMQ1	TPRN	Taperin
504	psites	tmt	0	0.893845	0.983569	0.139322	0.879159	0.104375	0.328254	0.865098	S	538	___1	CRLQCFQPRLLNLQDSDSEECTSRKPGQTVN	Q52LR7	Q52LR7	EPC2	Enhancer of polycomb homolog 2
505	psites	tmt	0	1.22728	0.877224	0.0389653	1.0766	0.141476	0.0315704	0.834648	S	94	___1	DSGSDALRSGLTVPTSPKGRLLDRRSRSGKG	Q53EL6	Q53EL6	PDCD4	Programmed cell death protein 4
506	psites	tmt	0	0.865531	1.06271	0.124865	0.919808	0.10194	0.189719	0.834648	S	82	___1	VPFVRVKREREVDEDSEPEREVRAKNGRVDS	Q53GS9	Q53GS9	USP39	U4/U6.U5 tri-snRNP-associated protein 2
507	psites	tmt	0	1.03837	0.972805	0.124073	1.01013	0.0348203	0.604909	0.9438	S	370	___1	NFSRPQIDENPLDDNSEEEMEDAPKQKLSKK	Q5F1R6	Q5F1R6	DNAJC21	DnaJ homolog subfamily C member 21
508	psites	tmt	0	0.699188	1.37594	0.360184	0.962042	0.271753	0.213712	0.834648	S	256	___1	VQHNACQWSKDQVNLSPKLIQPGTFTKTKED	Q5FBB7	Q5FBB7	SGOL1	Shugoshin-like 1
509	psites	tmt	0	1.0019	0.970287	0.0679992	0.972132	0.182456	0.931629	0.993769	S	617	___1	EACCKERIQQFDDGGSDEEDIWEEKHIAFTP	Q5H9R7	Q5H9R7	PPP6R3	Serine/threonine-protein phosphatase 6 regulatory subunit 3
510	psites	tmt	0	1.1333	0.924375	0.176882	1.04759	0.0917976	0.229544	0.843254	S	193	___1	HHHRHSSSHHKISNLSPEEEQGLWKQSHKSS	Q5HYJ3	Q5HYJ3	FAM76B	Protein FAM76B
511	psites	tmt	0	1.52038	0.91236	0.150592	1.38713	0.222173	0.163743	0.834648	S	1205	___1	RLQGVGALGQAASDNSGPEDAKRQAKKQKTR	Q5JPE7	Q5JPE7	NOMO2;NOMO3	Nodal modulator 2;Nodal modulator 3
512	psites	tmt	0	1.1646	0.932699	0.00675656	1.08622	0.0379075	0.0306217	0.834648	S	545	___1	RSPKRMGVHHLHRKDSLTQAQEQGNLLN___	Q5JTD0	Q5JTD0	TJAP1	Tight junction-associated protein 1
513	psites	tmt	0	1.16863	0.924752	0.0255942	1.08069	0.092172	0.0218424	0.812212	S	108	___1	KERKSLPAPVAQRPDSPGGGLQAPGQKRTPR	Q5JVS0	Q5JVS0	HABP4	Intracellular hyaluronan-binding protein 4
514	psites	tmt	0	0.95312	1.09147	0.371267	1.0403	0.0989646	0.996548	1	S	315	___1	PHPTARLLLAADPGGSPAQRRRTRGTPPGLV	Q5SQI0	Q5SQI0	ATAT1	Alpha-tubulin N-acetyltransferase 1
515	psites	tmt	0	1.13271	0.869251	0.234397	0.984611	0.0225868	0.496719	0.910559	S	1709	___1	LLSSLSRYFRRGAPSSPATGVLPSPQGKSTS	Q5SRE5	Q5SRE5	NUP188	Nucleoporin NUP188 homolog
516	psites	tmt	0	0.916925	1.18738	0.326163	1.08874	0.207132	0.823718	0.986664	S	1717	___1	FRRGAPSSPATGVLPSPQGKSTSLSKASPES	Q5SRE5	Q5SRE5	NUP188	Nucleoporin NUP188 homolog
517	psites	tmt	0	1.11327	1.00687	0.141745	1.12091	0.0303763	0.234576	0.845101	S	295	___1	DFPFEDYSQHIYRTISDGTISASKQESGKMD	Q5T0N5	Q5T0N5	FNBP1L	Formin-binding protein 1-like
518	psites	tmt	0	0.827679	0.930821	0.276849	0.770421	0.214282	0.471098	0.90494	S	664	___1	ENLKNQQTENLLKRRSFPLFDNSKANLDPGN	Q5T0W9	Q5T0W9	FAM83B	Protein FAM83B
519	psites	tmt	0	0.845845	1.10834	0.535237	0.937482	0.278401	0.761295	0.98551	S	956	___1	SEEEEEKAEERPRRPSQEQSASASSGQPQAP	Q5T1M5	Q5T1M5	FKBP15	FK506-binding protein 15
520	psites	tmt	0	0.916186	1.1228	0.173057	1.0287	0.0523208	0.439287	0.897566	S	993	___1	ERGNIETTSEDGQVFSPKKGQKKKSIEKKRK	Q5T200	Q5T200	ZC3H13	Zinc finger CCCH domain-containing protein 13
521	psites	tmt	0	1.06823	0.880834	0.121708	0.940931	0.216909	0.664898	0.960733	S	2719	___1	VLRPRNKRRHVTLPSSPRSNTPMGDKDDDDD	Q5T4S7	Q5T4S7	UBR4	E3 ubiquitin-protein ligase UBR4
522	psites	tmt	0	1.0969	0.894585	0.0298236	0.981272	0.011365	0.0545055	0.834648	S	473	___1	SFPSQAKLRESTPGDSPSTVNKLLQLPSTTI	Q5T6F2	Q5T6F2	UBAP2	Ubiquitin-associated protein 2
523	psites	tmt	0	1.00706	1.08206	0.1409	1.0897	0.187357	0.984993	1	S	518	___1	TKKTWFDKPNFNRTNSPGFQKKVQFGNENTK	Q5T8P6	Q5T8P6	RBM26	RNA-binding protein 26
524	psites	tmt	0	1.01914	1.01527	0.183609	1.0347	0.206584	0.920199	0.991803	S	528	___1	ISLPSDFQHKITVQASPNLDKRRSLNSSSSS	Q5TCX8	Q5TCX8	MLK4	Mitogen-activated protein kinase kinase kinase MLK4
525	psites	tmt	0	1.28045	0.86336	0.0461873	1.10549	0.116753	0.00778395	0.723135	S	335	___1	LPEDSIKVIRNMRAASPPASASDLIEQQQKR	Q5VSL9	Q5VSL9	STRIP1	Striatin-interacting protein 1
526	psites	tmt	0	1.12411	0.934803	0.135542	1.05083	0.100106	0.201027	0.834648	S	593	___1	LPSSAQPFIPKSFNYSPNSSTSEVSSTSASK	Q5VT52	Q5VT52	RPRD2	Regulation of nuclear pre-mRNA domain-containing protein 2
527	psites	tmt	0	0.924917	0.923089	0.172042	0.853781	0.0555204	0.634243	0.950873	S	529	___1	DSKDQSDKHDRRRSQSIEQESQEKQHKNKDE	Q5VTL8	Q5VTL8	PRPF38B	Pre-mRNA-splicing factor 38B
528	psites	tmt	0	1.26012	0.891256	0.062365	1.12309	0.196503	0.130205	0.834648	S	136	___1	LTERKALVVPEPEPDSDSNQERKDDRERGEG	Q5VTR2	Q5VTR2	RNF20	E3 ubiquitin-protein ligase BRE1A
529	psites	tmt	0	1.02158	0.964596	0.112466	0.985408	0.0507287	0.698604	0.970383	S	138	___1	ERKALVVPEPEPDSDSNQERKDDRERGEGQE	Q5VTR2	Q5VTR2	RNF20	E3 ubiquitin-protein ligase BRE1A
530	psites	tmt	0	1.08091	1.00453	0.159093	1.0858	0.331759	0.793263	0.986664	S	174	___1	KGLGKPGGQGDAIQLSPKLQALAEEPSQPHT	Q5VV41	Q5VV41	ARHGEF16	Rho guanine nucleotide exchange factor 16
531	psites	tmt	0	1.01663	0.975115	0.119205	0.991334	0.164266	0.924276	0.991803	S	340	___1	KHDGRGIIVDARQLPSPEPCEIQKNLNDNEM	Q5VVJ2	Q5VVJ2	MYSM1	Histone H2A deubiquitinase MYSM1
532	psites	tmt	0	0.894022	1.02292	0.137862	0.914518	0.0685247	0.425236	0.896798	S	1089	___1	FKQQTPSRTHKERSTSLSALVRSSPHGSLGS	Q5VZ89	Q5VZ89	DENND4C	DENN domain-containing protein 4C
533	psites	tmt	0	1.0991	0.971519	0.135274	1.0678	0.277649	0.648793	0.957337	S	1331	___1	PQPSPRTFSQEVSRRSWGQQAQEYQEQKQRS	Q5VZK9	Q5VZK9	LRRC16A	Leucine-rich repeat-containing protein 16A
534	psites	tmt	0	1.03762	1.04668	0.0660277	1.08605	0.20854	0.822956	0.986664	S	1360	___1	RSSSKDGHQGSKSNDSGEEAEKEFIFV____	Q5VZK9	Q5VZK9	LRRC16A	Leucine-rich repeat-containing protein 16A
535	psites	tmt	0	0.836014	1.11761	0.132531	0.934339	0.040517	0.0496147	0.834648	S	122	___1	TDDSLEVERRVTQHESDNENEIQIQNKLKKD	Q5VZL5	Q5VZL5	ZMYM4	Zinc finger MYM-type protein 4
536	psites	tmt	0	1.00624	0.980513	0.166559	0.986634	0.116992	0.910774	0.990033	S	305	___1	CSFPTRLVGMDPEQASVTNQNEYARSSGSNQ	Q5W0Z9	Q5W0Z9	ZDHHC20	Probable palmitoyltransferase ZDHHC20
537	psites	tmt	0	1.09558	0.974319	0.079376	1.06744	0.195642	0.497135	0.910559	S	333	___1	KPRKTLKEKKERRTPSDDEEDNLFAPPKLTD	Q641Q2;Q9Y4E1	Q641Q2	FAM21A;FAM21C	WASH complex subunit FAM21A;WASH complex subunit FAM21C
538	psites	tmt	0	0.771289	1.1599	0.0815611	0.894619	0.0807936	0.0855677	0.834648	S	539	___1	NLKPSSETKTQKGLFSDEEDSEDLFSSQSAS	Q641Q2	Q641Q2	FAM21A	WASH complex subunit FAM21A
539	psites	tmt	0	0.753896	1.17999	0.164532	0.889591	0.0544921	0.153756	0.834648	S	60	___1	KENRETKLNGPGENVSEDEAQSSNQRKRANK	Q659C4	Q659C4	LARP1B	La-related protein 1B
540	psites	tmt	0	0.777727	1.11688	0.156225	0.868625	0.0806508	0.0702538	0.834648	S	332	___1	QVEALPGPSLDQWHRSAGEEEDGPVLTDEQK	Q66PJ3	Q66PJ3	ARL6IP4	ADP-ribosylation factor-like protein 6-interacting protein 4
541	psites	tmt	0	0.986556	1.0594	0.362955	1.04515	0.170853	0.935214	0.99558	S	660	___1	RGVGSGPHPPDTQQPSPSKAFKPRFPGDQVV	Q68CZ2	Q68CZ2	TNS3	Tensin-3
542	psites	tmt	0	1.10749	0.958371	0.072695	1.06138	0.120116	0.196747	0.834648	S	776	___1	GSSAEQPLGGRLRKLSLGQYDNDAGGQLPFS	Q68CZ2	Q68CZ2	TNS3	Tensin-3
543	psites	tmt	0	0.996457	0.999525	0.0337219	0.995984	0.047723	0.913214	0.990987	S	1579	___1	DLHSELERSFLSEPSSPGRTKTTKGFKLGKH	Q69YN4	Q69YN4	KIAA1429	Protein virilizer homolog
544	psites	tmt	0	0.798013	1.08263	0.308858	0.86395	0.0140473	0.306443	0.858718	S	449	___1	IPLSSDAQAPLAQPESPTASAGDEPRSTPES	Q6GQQ9	Q6GQQ9	OTUD7B	OTU domain-containing protein 7B
545	psites	tmt	0	1.12497	1.00538	0.033727	1.13102	0.18617	0.501893	0.913359	S	773	___1	DDAQILPRSTRVRHFSQSEETGNEVFGALNE	Q6GYQ0	Q6GYQ0	RALGAPA1	Ral GTPase-activating protein subunit alpha-1
546	psites	tmt	0	0.905516	1.04128	0.0655107	0.942893	0.0652403	0.268561	0.855969	S	349	___1	GHKRLIRGPGENGDDS_______________	Q6IBS0	Q6IBS0	TWF2	Twinfilin-2
547	psites	tmt	0	1.02812	0.985927	0.295831	1.01366	0.24122	0.908965	0.989979	S	741	___1	EEKEVLLKTNLSGRQSPSFKLSLSSGTKTNL	Q6IN85	Q6IN85	SMEK1	Serine/threonine-protein phosphatase 4 regulatory subunit 3A
548	psites	tmt	0	1.03427	0.940773	0.108401	0.973011	0.0782993	0.746476	0.98231	S	21	___1	ALQRRAGGGGGLGAGSPALSGGQGRRRKQPP	Q6IQ22	Q6IQ22	RAB12	Ras-related protein Rab-12
549	psites	tmt	0	0.84573	1.13708	0.139015	0.961659	0.0602194	0.13222	0.834648	S	536	___1	WQLYEWQQRQQFRHGSPTAPICLGSPEFTDQ	Q6IQ23	Q6IQ23	PLEKHA7	Pleckstrin homology domain-containing family A member 7
550	psites	tmt	0	1.12292	1.01597	0.149487	1.14085	0.140639	0.318464	0.858718	S	278	___1	PSGSQRARVVNTDHGSPEQLQIPVTDSGRHI	Q6IQ49	Q6IQ49	SDE2	Protein SDE2 homolog
551	psites	tmt	0	1.07632	0.972486	0.0629751	1.0467	0.0440863	0.0989213	0.834648	S	2658	___1	TNARNKAITSLLGGGSPKNNTAAETEDDESD	Q6KC79	Q6KC79	NIPBL	Nipped-B-like protein
552	psites	tmt	0	0.788455	1.00964	0.231179	0.796056	0.395325	0.507811	0.919373	S	543	___1	MNFVLMGGTLNRNGLSPPPCKLPCLSPPSYT	Q6NXG1	Q6NXG1	ESRP1	Epithelial splicing regulatory protein 1
553	psites	tmt	0	0.817833	1.08923	0.161776	0.890811	0.086483	0.14827	0.834648	S	449	___1	DDLLVDPRDKENGNNSPLPKYATSPKPNNSY	Q6P1L5	Q6P1L5	FAM117B	Protein FAM117B
554	psites	tmt	0	1.14069	1.04968	0.0313238	1.19736	0.170073	0.188766	0.834648	S	273	___1	EEYSEKKKGSHKRSASWGSTDQLKEIAKLRQ	Q6P1L5	Q6P1L5	FAM117B	Protein FAM117B
555	psites	tmt	0	0.990234	0.992619	0.0552659	0.982924	0.118488	0.839963	0.986664	S	879	___1	HLLQQRDSQDASAEQSDHDDEVASLASASGG	Q6P2E9	Q6P2E9	EDC4	Enhancer of mRNA-decapping protein 4
556	psites	tmt	0	1.2562	0.838645	0.27184	1.05351	0.0707918	0.165279	0.834648	S	723	___1	SLELQEVEPLGLPQASPSRTRSPDVISSAST	Q6P2E9	Q6P2E9	EDC4	Enhancer of mRNA-decapping protein 4
557	psites	tmt	0	1.1839	1.28066	0.0525021	1.51617	0.856415	0.940827	0.996956	S	384	___1	RKSYESSEDCSEAAGSPARKVKMRRH_____	Q6P6C2	Q6P6C2	ALKBH5	RNA demethylase ALKBH5
558	psites	tmt	0	0.898531	1.01271	0.0539915	0.909955	0.126485	0.147839	0.834648	S	175	___1	AVQKLKAVAGVMITASHNRKEDNGYKVYWET	Q6PCE3	Q6PCE3	PGM2L1	Glucose 1,6-bisphosphate synthase
559	psites	tmt	0	1.00473	1.01265	0.0184791	1.01744	0.259495	0.912035	0.990893	S	970	___1	RKKKKRRRHPKGEEGSDDDETENGPKPKKRR	Q6PD62	Q6PD62	CTR9	RNA polymerase-associated protein CTR9 homolog
560	psites	tmt	0	1.15576	0.917019	0.273904	1.05985	0.0559904	0.500705	0.912771	S	177	___1	LELPSQEAPSFQGTESPKPCKMPKIVDPLAR	Q6PJF5	Q6PJF5	RHBDF2	Inactive rhomboid protein 2
561	psites	tmt	0	0.968337	1.05747	0.0576212	1.02399	0.0131158	0.326901	0.863688	S	461	___1	LRGGVIQSTRRRRRASQEANLLTLAQKAVEL	Q6PJG2	Q6PJG2	ELMSAN1	ELM2 and SANT domain-containing protein 1
562	psites	tmt	0	1.22346	0.875227	0.00606803	1.0708	0.0901	0.00453023	0.723135	S	515	___1	HLMQTRDLVQPDKPASPKFIVTLDGVPSPPG	Q6PJT7	Q6PJT7	ZC3H14	Zinc finger CCCH domain-containing protein 14
563	psites	tmt	0	1.33834	0.839197	0.441415	1.12313	0.0860655	0.22691	0.835963	S	90	___1	SPRPLQLPGAEGPAISDGEEGGGEPGAGGGA	Q6PKG0	Q6PKG0	LARP1	La-related protein 1
564	psites	tmt	0	1.07764	1.00693	0.153178	1.08511	0.056712	0.355409	0.874972	S	548	___1	EEVSNLKTLPKGLSASLPDLDSENWIEVKKR	Q6PKG0	Q6PKG0	LARP1	La-related protein 1
565	psites	tmt	0	0.943759	1.0477	0.0515798	0.988778	0.0763604	0.329913	0.866244	S	143	___1	TKNALPPVLTTVNGQSPPEHSAPAKVVRAAV	Q6PKG0	Q6PKG0	LARP1	La-related protein 1
566	psites	tmt	0	1.10033	1.02652	0.116093	1.12951	0.0929383	0.23476	0.845101	S	774	___1	EPSTIARSLPTTVPESPNYRNTRTPRTPRTP	Q6PKG0	Q6PKG0	LARP1	La-related protein 1
567	psites	tmt	0	1.18244	0.86031	0.149845	1.01726	0.0831398	0.293748	0.858718	S	1763	___1	KTRNQGRRTVLYNDDSDNDNFVSTEDPLNLG	Q6RI45	Q6RI45	BRWD3	Bromodomain and WD repeat-containing protein 3
568	psites	tmt	0	1.07299	0.958329	0.0131077	1.02828	0.0508706	0.200941	0.834648	S	62	___1	FQKLQQLRLTQYHGGSLPNVSQLRSSASEFQ	Q6UUV7	Q6UUV7	CRTC3	CREB-regulated transcription coactivator 3
569	psites	tmt	0	0.825848	1.03832	0.176211	0.85749	0.0960155	0.322146	0.858718	S	315	___1	SFLGGLRSKNDVLSRSNVCINGNHVYLEQPE	Q6WKZ4	Q6WKZ4	RAB11FIP1	Rab11 family-interacting protein 1
570	psites	tmt	0	1.07693	0.905447	0.0671281	0.975103	0.101791	0.301896	0.858718	S	537	___1	SERLQALVNSLCAGQSP______________	Q6XQN6	Q6XQN6	NAPRT	Nicotinate phosphoribosyltransferase
571	psites	tmt	0	1.00126	1.24253	0.0753709	1.2441	0.177919	0.972739	1	S	1284	___1	MVRADPSLLGFSVNASSERLNMGEIETLDDY	Q6Y7W6	Q6Y7W6	GIGYF2	PERQ amino acid-rich with GYF domain-containing protein 2
572	psites	tmt	0	0.746293	1.22516	0.00670834	0.914331	0.308262	0.288861	0.858718	S	26	___1	GPEWLRALSSGGSITSPPLSPALPKYKLADY	Q6Y7W6	Q6Y7W6	GIGYF2	PERQ amino acid-rich with GYF domain-containing protein 2
573	psites	tmt	0	0.893918	1.13503	0.052943	1.01462	0.386512	0.546808	0.936012	S	236	___1	RLAGSRRDGERWRPHSPDGPRSAGWREHMER	Q6Y7W6	Q6Y7W6	GIGYF2	PERQ amino acid-rich with GYF domain-containing protein 2
574	psites	tmt	0	0.885709	1.08327	0.0646422	0.959461	0.13842	0.157957	0.834648	S	515	___1	FSITTPDPTPNLKRLSNLPGYLQKKEEIKSA	Q6ZN28	Q6ZN28	MACC1	Metastasis-associated in colon cancer protein 1
575	psites	tmt	0	1.24432	0.882477	0.309084	1.09808	0.460213	0.61775	0.948	S	191	___1	EAYKMAWLSQRQLARSCLDLNTISQSPGWAQ	Q6ZN28	Q6ZN28	MACC1	Metastasis-associated in colon cancer protein 1
576	psites	tmt	0	0.777595	1.09543	0.00188928	0.851801	0.0122935	0.00121989	0.723135	S	34	___1	SEANLIDMEAGKLSKSCNITECQDPDLLHNW	Q6ZN28	Q6ZN28	MACC1	Metastasis-associated in colon cancer protein 1
577	psites	tmt	0	1.0165	1.0486	0.0502997	1.0659	0.100124	0.821236	0.986664	S	2739	___1	SSQFARKLWRSSRRISQVSSGETEYNPTEAR	Q6ZNJ1	Q6ZNJ1	NBEAL2	Neurobeachin-like protein 2
578	psites	tmt	0	0.899227	0.981275	0.103242	0.882389	0.0666402	0.142762	0.834648	S	523	___1	LDYVPSSASREVRHGSDPAFAPGPRGLEPSG	Q6ZRV2	Q6ZRV2	FAM83H	Protein FAM83H
579	psites	tmt	0	1.04724	0.972809	0.0297699	1.01877	0.0863381	0.45833	0.902495	S	881	___1	ESKGSPTSAYPERKGSPTPGFSTRRGSPTTG	Q6ZRV2	Q6ZRV2	FAM83H	Protein FAM83H
580	psites	tmt	0	1.15333	0.956704	0.101149	1.10339	0.104425	0.167267	0.834648	S	936	___1	ERRSSPVPPVPERRGSLTLTISGESPKAGPA	Q6ZRV2	Q6ZRV2	FAM83H	Protein FAM83H
581	psites	tmt	0	0.900202	1.00036	0.190631	0.900522	0.0648051	0.405339	0.89152	S	892	___1	ERKGSPTPGFSTRRGSPTTGFIEQKGSPTSA	Q6ZRV2	Q6ZRV2	FAM83H	Protein FAM83H
582	psites	tmt	0	0.893053	0.931459	0.0453239	0.831842	0.04182	0.122219	0.834648	S	1003	___1	PVPQENGQPESPRRLSLGQGDSTEAATEERG	Q6ZRV2	Q6ZRV2	FAM83H	Protein FAM83H
583	psites	tmt	0	1.00688	0.877217	0.118405	0.883255	0.0252547	0.916091	0.991742	S	998	___1	DEGGFPVPQENGQPESPRRLSLGQGDSTEAA	Q6ZRV2	Q6ZRV2	FAM83H	Protein FAM83H
584	psites	tmt	0	0.924083	1.09719	0.263427	1.01389	0.141284	0.668958	0.960786	S	647	___1	VPAAFPTKVPVPGPGSGGNGPEREGPEEPGL	Q6ZRV2	Q6ZRV2	FAM83H	Protein FAM83H
585	psites	tmt	0	0.972953	1.20644	0.175994	1.17381	0.104119	0.862244	0.986664	S	93	___1	PGKLGGAVPFAPPEVSPEQAKTVQGGRKNQF	Q6ZSR9	Q6ZSR9	#N/A	Uncharacterized protein FLJ45252
586	psites	tmt	0	0.920751	1.04215	0.188762	0.959562	0.0457005	0.575333	0.936012	S	1103	___1	LMGKDESTSRNRRSLSPILPGRHSPAPPPDP	Q6ZSZ5	Q6ZSZ5	ARHGEF18	Rho guanine nucleotide exchange factor 18
587	psites	tmt	0	1.12123	0.851155	0.388591	0.954342	0.420598	0.819739	0.986664	S	466	___1	SIHKSSQDGDTPAQASPPEEKVPAELDEVGS	Q6ZUM4	Q6ZUM4	ARHGAP27	Rho GTPase-activating protein 27
588	psites	tmt	0	0.669549	1.11779	0.0278566	0.748412	0.0944816	0.0286457	0.834648	S	3406	___1	RDSSIIDPGTEQDLPSPENSSVKEYRMEVPS	Q70CQ2	Q70CQ2	USP34	Ubiquitin carboxyl-terminal hydrolase 34
589	psites	tmt	0	1.20572	0.940021	0.0750575	1.1334	0.0505397	0.0992065	0.834648	S	597	___1	VSPPSTTKPSRASTASPCNNNINAATAVALQ	Q71RC2	Q71RC2	LARP4	La-related protein 4
590	psites	tmt	0	1.07839	1.01098	0.0510225	1.09024	0.135307	0.355807	0.874972	S	478	___1	PTCTESRWKSEEEVESDDEYLALPARLTQVS	Q76N32	Q76N32	CEP68	Centrosomal protein of 68 kDa
591	psites	tmt	0	0.937714	1.02898	0.0733832	0.964889	0.104175	0.420427	0.896798	S	456	___1	RESGRKASSTAKVPASPLPGLERKKTTPTPS	Q7KZI7	Q7KZI7	MARK2	Serine/threonine-protein kinase MARK2
592	psites	tmt	0	1.25395	0.8802	0.127523	1.10373	0.254896	0.165298	0.834648	S	804	___1	NERKKLQKAALGLQDSDDEDAAVDIDEQIES	Q7L014	Q7L014	DDX46	Probable ATP-dependent RNA helicase DDX46
593	psites	tmt	0	0.759725	0.994661	0.266244	0.755668	0.0642188	0.318756	0.858718	S	60	___1	GGTERGPGRCAPSAGSPAAAVGRESPGAAAT	Q7L2J0	Q7L2J0	MEPCE	7SK snRNA methylphosphate capping enzyme
594	psites	tmt	0	1.115	0.910484	0.0936094	1.01519	0.0800283	0.3362	0.868922	S	25	___1	SIPRDPSDLSHSRKFSAACNFSNILVNQERL	Q7L9B9	Q7L9B9	EEPD1	Endonuclease/exonuclease/phosphatase family domain-containing protein 1
595	psites	tmt	0	1.08536	0.963214	0.139741	1.04543	0.20612	0.596749	0.941922	S	257	___1	AYRARSKSRDRFFQGSQEFLASASASAERSC	Q7Z2W4	Q7Z2W4	ZC3HAV1	Zinc finger CCCH-type antiviral protein 1
596	psites	tmt	0	0.938873	1.04593	0.0466407	0.981999	0.143279	0.459543	0.902495	S	335	___1	GTSQAGTSQRFLENGSQEDLLHGNPGSTYLA	Q7Z2W4	Q7Z2W4	ZC3HAV1	Zinc finger CCCH-type antiviral protein 1
597	psites	tmt	0	1.09074	0.942171	0.118938	1.02767	0.00569184	0.396235	0.888673	S	599	___1	VARLNVKAQKLHPDGSPDVAGEKGIQKIPSG	Q7Z2Z1	Q7Z2Z1	TICRR	Treslin
598	psites	tmt	0	0.734572	1.00848	0.169092	0.740801	0.13852	0.187352	0.834648	S	947	___1	SVIYSNLTREQAPDISPKSDTLTDSQIDRDL	Q7Z333	Q7Z333	SETX	Probable helicase senataxin
599	psites	tmt	0	1.02665	1.05475	0.286097	1.08285	0.108315	0.740708	0.98231	S	1045	___1	QSVQPWERRTFPLAHSPQAECEDQLDAQERA	Q7Z3B3	Q7Z3B3	KANSL1	KAT8 regulatory NSL complex subunit 1
600	psites	tmt	0	1.25377	0.933899	0.00128341	1.17089	0.205425	0.278651	0.855969	S	18	___1	QFDTEYQRLEASYSDSPPGEEDLLVHVAEGS	Q7Z3C6	Q7Z3C6	ATG9A	Autophagy-related protein 9A
601	psites	tmt	0	1.08042	0.979327	0.178841	1.05808	0.139167	0.481015	0.90494	S	1015	___1	ETRNIQSRCFRKRHKSDNETNLQQQVVWGNR	Q7Z401	Q7Z401	DENND4A	C-myc promoter-binding protein
602	psites	tmt	0	0.873527	1.08744	0.126777	0.949906	0.0150252	0.284126	0.855969	S	109	___1	PWPMQARRAHRQRNASRDQVVYGSGTKTDRW	Q7Z404	Q7Z404	TMC4	Transmembrane channel-like protein 4
603	psites	tmt	0	0.954246	0.939474	0.0346815	0.89649	0.054321	0.1931	0.834648	S	45	___1	TPRGPSAGGGPGSGTSPQVEWTARRLVWVPS	Q7Z406	Q7Z406	MYH14	Myosin-14
604	psites	tmt	0	0.996448	0.969631	0.073496	0.966188	0.174495	0.89515	0.98915	S	1969	___1	TRTVRQVFRLEEGVASDEEAEEAQPGSGPSP	Q7Z406	Q7Z406	MYH14	Myosin-14
605	psites	tmt	0	1.10216	1.03877	0.0881926	1.1449	0.114939	0.318497	0.858718	S	629	___1	FLSKDYEIESQNPLASPTNTLLGSAKEQRYQ	Q7Z417	Q7Z417	NUFIP2	Nuclear fragile X mental retardation-interacting protein 2
606	psites	tmt	0	0.98147	1.17346	0.175712	1.15171	0.172135	0.882345	0.986664	S	212	___1	YITNGYMGKGADNDGSGSESGYTTPKKRKAR	Q7Z417	Q7Z417	NUFIP2	Nuclear fragile X mental retardation-interacting protein 2
607	psites	tmt	0	0.83218	1.11458	0.0626682	0.927535	0.0780895	0.121531	0.834648	S	112	___1	LNGNAGEREISLKNLSSDEATNPISRVLNGN	Q7Z417	Q7Z417	NUFIP2	Nuclear fragile X mental retardation-interacting protein 2
608	psites	tmt	0	1.32327	0.865467	0.0630068	1.14524	0.223365	0.106564	0.834648	S	230	___1	ESGYTTPKKRKARRNSAKGCENLNIVQDKIM	Q7Z417	Q7Z417	NUFIP2	Nuclear fragile X mental retardation-interacting protein 2
609	psites	tmt	0	1.2293	0.878317	0.157681	1.07972	0.152812	0.167325	0.834648	S	1196	___1	SLRGVTEAIEKFSFRSQEDLNEPIKRDGKKE	Q7Z460	Q7Z460	CLASP1	CLIP-associating protein 1
610	psites	tmt	0	0.813002	1.13313	0.132264	0.921234	0.163211	0.295513	0.858718	S	238	___1	AVVPVSKTITVPVSGSPKMSNIMQSIANSLP	Q7Z589	Q7Z589	EMSY	Protein EMSY
611	psites	tmt	0	0.839865	1.10668	0.202855	0.929465	0.284251	0.536553	0.934541	S	221	___1	ETNDTWNSQFGKRPESPSEISPIKGSVRTGL	Q7Z5K2	Q7Z5K2	WAPAL	Wings apart-like protein homolog
612	psites	tmt	0	1.07066	0.991806	0.101982	1.06189	0.0505298	0.333292	0.866244	S	77	___1	PKVEEESTGDPFGFDSDDESLPVSSKNLAQV	Q7Z5K2	Q7Z5K2	WAPAL	Wings apart-like protein homolog
613	psites	tmt	0	0.927202	1.05163	0.0596329	0.97507	0.111221	0.256512	0.855001	S	175	___1	NGFSKLEEPPELNRQSPNPRRGHAVPPTLVP	Q7Z5L9	Q7Z5L9	IRF2BP2	Interferon regulatory factor 2-binding protein 2
614	psites	tmt	0	1.42673	0.72295	0.560276	1.03146	0.108098	0.412153	0.896798	S	1179	___1	SMKISKLEVTEIVKPSPKRKMEPDTEKMDRT	Q7Z6E9	Q7Z6E9	RBBP6	E3 ubiquitin-protein ligase RBBP6
615	psites	tmt	0	0.875351	1.06888	0.116261	0.935647	0.223712	0.359313	0.874972	S	1328	___1	MIQVPQSKWDKDDFESEEEDVKSTQPISSVG	Q7Z6E9	Q7Z6E9	RBBP6	E3 ubiquitin-protein ligase RBBP6
616	psites	tmt	0	1.01968	0.98097	0.119997	1.00028	0.205756	0.939182	0.996956	S	2887	___1	GDTSAAGSSEQPRAGSSTPGDAPPAVAEVQG	Q7Z6Z7	Q7Z6Z7	HUWE1	E3 ubiquitin-protein ligase HUWE1
617	psites	tmt	0	1.03002	0.981599	0.122445	1.01106	0.0805837	0.670866	0.960786	S	1907	___1	CIRIALPAPRGSGTASDDEFENLRIKGPNAV	Q7Z6Z7	Q7Z6Z7	HUWE1	E3 ubiquitin-protein ligase HUWE1
618	psites	tmt	0	1.02176	1.01551	0.255706	1.03761	0.0721816	0.864043	0.986664	S	353	___1	QGGRLSAITMALQYGSESEEDAALAAARYEE	Q86U86	Q86U86	PBRM1	Protein polybromo-1
619	psites	tmt	0	1.14297	1.02262	0.0691713	1.16883	0.152172	0.162888	0.834648	S	568	___1	NSVPPSQTKSETSWESPKQIKKKKKARRET_	Q86UE4	Q86UE4	MTDH	Protein LYRIC
620	psites	tmt	0	0.636873	1.06567	0.194625	0.678695	0.157493	0.128276	0.834648	S	308	___1	LSSQISAGEEKWNSVSPASAGKRKTEPSAWS	Q86UE4	Q86UE4	MTDH	Protein LYRIC
621	psites	tmt	0	1.20886	0.745317	0.258181	0.900985	0.151983	0.225418	0.835963	S	75	___1	KKNKKKEIQNGNLHESDSESVPRDFKLSDAL	Q86UP2	Q86UP2	KTN1	Kinectin
622	psites	tmt	0	0.953806	0.895017	0.215927	0.853672	0.307272	0.787194	0.986664	S	1758	___1	LAALGAPGPAPTAASSP______________	Q86V15	Q86V15	CASZ1	Zinc finger protein castor homolog 1
623	psites	tmt	0	0.853183	1.09408	0.0937232	0.93345	0.294146	0.290632	0.858718	S	659	___1	LRCRVIKSSGREKPDSDDDLDIASLVTAKLV	Q86V48	Q86V48	LUZP1	Leucine zipper protein 1
624	psites	tmt	0	0.980702	1.08992	0.320245	1.06889	0.659045	0.782319	0.986664	S	67	___1	ESAARGPSQEEEDNHSDEEDRASEPKSQDQD	Q86VM9	Q86VM9	ZC3H18	Zinc finger CCCH domain-containing protein 18
625	psites	tmt	0	0.990756	1.00774	0.0763062	0.998427	0.0587238	0.871355	0.986664	S	534	___1	WRRSKSPKKKLGVSVSPSRARRRRKTSASSA	Q86VM9	Q86VM9	ZC3H18	Zinc finger CCCH domain-containing protein 18
626	psites	tmt	0	1.01274	1.01892	0.0299884	1.0319	0.00719148	0.614945	0.948	S	868	___1	PDRGSRDRKSGGRLGSPKPERQRGQNSKAPA	Q86VM9	Q86VM9	ZC3H18	Zinc finger CCCH domain-containing protein 18
627	psites	tmt	0	1.03197	1.00083	0.116318	1.03283	0.0577868	0.603258	0.941922	S	893	___1	NSKAPAAPADRKRQLSPQSKSSSKVTSVPGK	Q86VM9	Q86VM9	ZC3H18	Zinc finger CCCH domain-containing protein 18
628	psites	tmt	0	0.939661	1.00228	0.0489674	0.941801	0.161201	0.626178	0.948	S	320	___1	GQTPLTEGSEDLDGHSDPEESFARDLPDFPS	Q86VR2	Q86VR2	FAM134C	Protein FAM134C
629	psites	tmt	0	1.00065	1.10073	0.0281284	1.10145	0.24422	0.942539	0.996956	S	335	___1	ESPRRMMTRSQDATFSPGSEQAEKSPGPIVS	Q86WB0	Q86WB0	ZC3HC1	Nuclear-interacting partner of ALK
630	psites	tmt	0	0.99984	0.990191	0.0351476	0.990033	0.0448767	0.990575	1	S	464	___1	GPALTPIRDEEWGGHSPRSPRGWDQEPAREQ	Q86X29	Q86X29	LSR	Lipolysis-stimulated lipoprotein receptor
631	psites	tmt	0	0.875998	1.04123	0.111205	0.912113	0.127289	0.167088	0.834648	S	530	___1	SNGGRSRAYMPPRSRSRDDLYDQDDSRDFPR	Q86X29	Q86X29	LSR	Lipolysis-stimulated lipoprotein receptor
632	psites	tmt	0	1.15037	0.997066	0.299687	1.147	0.677376	0.912935	0.990987	S	96	___1	EDSSNVDLPYIPAENSPTRQQFHSKPVDSDS	Q86XP3	Q86XP3	DDX42	ATP-dependent RNA helicase DDX42
633	psites	tmt	0	1.03054	1.01756	0.0560524	1.04864	0.273523	0.95827	0.998967	S	185	___1	AGVVQEEEEDNLEYDSDGNPIAPTKKIIDPL	Q86XP3	Q86XP3	DDX42	ATP-dependent RNA helicase DDX42
634	psites	tmt	0	0.835501	1.0183	0.420072	0.850792	1.05953	0.511841	0.924291	S	260	___1	LDKLSSPAAFLPACNSPSKEMKEIPFNEDPN	Q86YS7	Q86YS7	C2CD5	C2 domain-containing protein 5
635	psites	tmt	0	0.781851	1.22215	0.233042	0.955541	0.0786219	0.162574	0.834648	S	295	___1	SSGPSTPLKNQTYSFSPSKSYSRQSSSSDTD	Q86YS7	Q86YS7	C2CD5	C2 domain-containing protein 5
636	psites	tmt	0	0.637693	1.14107	0.163298	0.72765	0.527878	0.332722	0.866244	S	510	___1	SAVGVQWPRGPVSQNSEVGEEETSAGQGLSS	Q86YV5	Q86YV5	SGK223	Tyrosine-protein kinase SgK223
637	psites	tmt	0	1.16401	0.934103	0.00768364	1.0873	0.020881	0.0105765	0.73174	S	384	___1	APSRNLAPTPRRRKASPEPEGEAAGKMTTEE	Q8IU81	Q8IU81	IRF2BP1	Interferon regulatory factor 2-binding protein 1
638	psites	tmt	0	0.845702	1.09385	0.145889	0.925074	0.0134084	0.258904	0.855316	S	436	___1	SPIAALKNVAEALGHSPKDPGGGGGPVRAGG	Q8IU81	Q8IU81	IRF2BP1	Interferon regulatory factor 2-binding protein 1
639	psites	tmt	0	1.06886	0.968637	0.103723	1.03533	0.328219	0.894829	0.98915	S	654	___1	SFLSWGTNKNRQKSASTLCLPSVGAARPQVK	Q8IUC4	Q8IUC4	RHPN2;RHPN2P1	Rhophilin-2;Putative rhophilin-2-like protein RHPN2P1
640	psites	tmt	0	0.932664	1.15364	0.175712	1.07596	0.206821	0.742631	0.98231	S	653	___1	LRSLEPEPQQSLEDGSPAKGEPSQAWREQRR	Q8IV36	Q8IV36	HID1	Protein HID1
641	psites	tmt	0	1.27905	0.988466	0.236841	1.2643	0.11133	0.120298	0.834648	S	49	___1	PAQPAPGEPTPPAPPSPDWTSSSRENQHPNL	Q8IV56	Q8IV56	PRR15	Proline-rich protein 15
642	psites	tmt	0	1.12711	0.921453	0.0938908	1.03858	0.125982	0.264972	0.855969	S	394	___1	DWVSEGPQPGLRRALSSDSILSPAPDARAAD	Q8IVT2	Q8IVT2	MISP	Mitotic interactor and substrate of PLK1
643	psites	tmt	0	1.03162	1.00733	0.378698	1.03918	0.165415	0.732857	0.978777	S	575	___1	EVAEERRNALFPEVFSPTPDENSDQNSRSSS	Q8IVT2	Q8IVT2	MISP	Mitotic interactor and substrate of PLK1
644	psites	tmt	0	0.939733	1.46977	0.0778331	1.38119	0.423037	0.764295	0.98551	S	924	___1	GRTKSSYKSILPYPVSPKQKYSHVILGDKVT	Q8IWI9	Q8IWI9	MGA	MAX gene-associated protein
645	psites	tmt	0	0.936325	0.966053	0.168501	0.90454	0.112975	0.621663	0.948	S	240	___1	EQIRATTPPNQGRPDSPVYANLQELKISQSA	Q8IWW6	Q8IWW6	ARHGAP12	Rho GTPase-activating protein 12
646	psites	tmt	0	0.950325	1.06	0.106516	1.00734	0.25415	0.683642	0.967752	S	165	___1	LDLTHNNGKFNNDSHSPKVSSQNRTRSFGHF	Q8IWW6	Q8IWW6	ARHGAP12	Rho GTPase-activating protein 12
647	psites	tmt	0	1.11101	0.8806	0.540227	0.978352	0.303061	0.656416	0.958951	S	215	___1	DSAGEGSERIHQDSESGDELSSSSTEQIRAT	Q8IWW6	Q8IWW6	ARHGAP12	Rho GTPase-activating protein 12
648	psites	tmt	0	0.838537	1.29617	0.161605	1.08688	0.203817	0.285636	0.855969	S	592	___1	QAVETDEGIEEEIPDSPGIEKHDKEKEQKDP	Q8IWW6	Q8IWW6	ARHGAP12	Rho GTPase-activating protein 12
649	psites	tmt	0	0.929479	1.28579	0.248651	1.19512	0.231249	0.731648	0.978776	S	485	___1	LLWEKAVQQHQHGYDSDEEVDSELGTWEHQL	Q8IWZ8	Q8IWZ8	SUGP1	SURP and G-patch domain-containing protein 1
650	psites	tmt	0	1.03361	0.990942	0.0117995	1.02425	0.0261282	0.245899	0.855001	S	155	___1	DPPVASSCISEKSPRSPQLSDFGLERYIVSQ	Q8IX90	Q8IX90	SKA3	Spindle and kinetochore-associated protein 3
651	psites	tmt	0	1.09252	0.933114	0.0756191	1.01945	0.12503	0.27636	0.855969	S	105	___1	FFGPALPPGFKKQDDSPPRPIIGPALPPGFI	Q8IXQ4	Q8IXQ4	GPALPP1	GPALPP motifs-containing protein 1
652	psites	tmt	0	0.964838	0.993534	0.0294426	0.958599	0.0682601	0.360772	0.874972	S	696	___1	RHSPSPRPRAPQTSSSPPPVRRGASSSPQRR	Q8IYB3	Q8IYB3	SRRM1	Serine/arginine repetitive matrix protein 1
653	psites	tmt	0	1.06642	1.07869	0.215987	1.15033	0.242012	0.750622	0.98359	S	10	___1	______MDAGFFRGTSAEQDNRFSNKQKKLL	Q8IYB3	Q8IYB3	SRRM1	Serine/arginine repetitive matrix protein 1
654	psites	tmt	0	0.808449	1.21628	0.174922	0.983299	0.170545	0.209872	0.834648	S	874	___1	QEEPVAAPEPKKETESEAEDNLDDLEKHLRE	Q8IYB3	Q8IYB3	SRRM1	Serine/arginine repetitive matrix protein 1
655	psites	tmt	0	0.979152	1.00077	0.0748148	0.979907	0.0489372	0.670565	0.960786	S	616	___1	QRRYSPSPPPKRRTASPPPPPKRRASPSPPP	Q8IYB3	Q8IYB3	SRRM1	Serine/arginine repetitive matrix protein 1
656	psites	tmt	0	1.14969	0.908109	0.157841	1.04404	0.0769643	0.157383	0.834648	S	597	___1	PSPPPRRRSPSPRRYSPPIQRRYSPSPPPKR	Q8IYB3	Q8IYB3	SRRM1	Serine/arginine repetitive matrix protein 1
657	psites	tmt	0	1.11944	0.965987	0.13658	1.08137	0.127946	0.262851	0.855969	S	863	___1	QRVLDTSSLTQSAPASPTNKGVHIHQAGGSP	Q8N122	Q8N122	RPTOR	Regulatory-associated protein of mTOR
658	psites	tmt	0	1.0249	0.999827	0.0668248	1.02472	0.129394	0.797799	0.986664	S	772	___1	CHPPGHGDHLDRAKNSPPQAPSTRDHGSWSL	Q8N1F8	Q8N1F8	STK11IP	Serine/threonine-protein kinase 11-interacting protein
659	psites	tmt	0	1.11628	1.04079	0.0245653	1.16182	0.0307222	0.0584857	0.834648	S	433	___1	SVARKAVVLPGGTATSPKMIAKNVLGLVPQA	Q8N1G0	Q8N1G0	ZNF687	Zinc finger protein 687
660	psites	tmt	0	0.997191	0.972182	0.0991404	0.969451	0.0790378	0.982202	1	S	1057	___1	EKHVQVRHGLQLGAQSPGRGTTLARGSSARA	Q8N1G0	Q8N1G0	ZNF687	Zinc finger protein 687
661	psites	tmt	0	1.11044	1.06997	0.0543912	1.18814	0.0405323	0.0553465	0.834648	S	335	___1	PGREEKITFITSFGGSDEEAAAAAAAAAASG	Q8N2M8	Q8N2M8	CLASRP	CLK4-associating serine/arginine rich protein
662	psites	tmt	0	0.326685	1.56716	0.168179	0.511967	0.184084	0.0241324	0.812212	S	297	___1	AKEQVALQEGHKLCLSTVDLEVKCQPDAAVA	Q8N370	Q8N370	SLC43A2	Large neutral amino acids transporter small subunit 4
663	psites	tmt	0	0.982267	1.08462	0.171434	1.06538	0.270854	0.847749	0.986664	S	116	___1	VKATGGLCLLGAYADSDDDDNDVSEKLAQSK	Q8N3X1	Q8N3X1	FNBP4	Formin-binding protein 4
664	psites	tmt	0	1.16311	0.941227	0.196323	1.09475	0.104542	0.18045	0.834648	S	18	___1	KKSRAVPGRRPILQLSPPGPRGSTPGRDPEP	Q8N3X1	Q8N3X1	FNBP4	Formin-binding protein 4
665	psites	tmt	0	1.18788	0.899183	0.0595236	1.06812	0.0140892	0.00848106	0.723135	S	701	___1	GSRPAQAVRARPRSNSAWQIYLQRRAERGTP	Q8N4C8	Q8N4C8	MINK1	Misshapen-like kinase 1
666	psites	tmt	0	0.952661	1.0594	0.119576	1.00925	0.0800382	0.620215	0.948	S	778	___1	SLERNRVGVSSKPDSSPVLSPGNKAKPDDHR	Q8N4C8	Q8N4C8	MINK1	Misshapen-like kinase 1
667	psites	tmt	0	1.32913	0.982166	0.151926	1.30542	0.611623	0.648957	0.957337	S	77	___1	SSLHRKSRSKDYDVYSDNDICSQESEDNFAK	Q8N5P1	Q8N5P1	ZC3H8	Zinc finger CCCH domain-containing protein 8
668	psites	tmt	0	0.953194	1.04536	0.0815969	0.996433	0.35835	0.792907	0.986664	S	368	___1	SGPPKYKDNPFSLGESFGSRWDTDAAWGMDR	Q8N6H7	Q8N6H7	ARFGAP2	ADP-ribosylation factor GTPase-activating protein 2
669	psites	tmt	0	0.94788	0.988909	0.116948	0.937368	0.0928996	0.50679	0.918313	S	83	___1	RRPRRRRRVNDAEPGSPEAPQGKRRKADGED	Q8N8A6	Q8N8A6	DDX51	ATP-dependent RNA helicase DDX51
670	psites	tmt	0	0.777011	1.07587	0.143295	0.835966	0.013765	0.136605	0.834648	S	974	___1	SIHEALRRIKEASPESEDEEEALPCTDWEN_	Q8N9B5	Q8N9B5	JMY	Junction-mediating and -regulatory protein
671	psites	tmt	0	0.982319	0.975289	0.056994	0.958044	0.114041	0.754447	0.984326	S	171	___1	EQKQLKESFRAFVEDSEDEDGAGEGGSSLLQ	Q8N9T8	Q8N9T8	KRI1	Protein KRI1 homolog
672	psites	tmt	0	1.00319	1.0748	0.102562	1.07822	0.142615	0.992436	1	S	540	___1	VPSSVTDVALPALLDSDEERMITHFERSKME	Q8NBN3	Q8NBN3	TMEM87A	Transmembrane protein 87A
673	psites	tmt	0	0.993672	1.03948	0.0859165	1.0329	0.077544	0.934801	0.99558	S	385	___1	DLLGRPQALSRQALDSEEEEEDVAAKETLLR	Q8NC44	Q8NC44	FAM134A	Protein FAM134A
674	psites	tmt	0	0.96087	0.985022	0.00714772	0.946477	0.0515496	0.245873	0.855001	S	499	___1	GEDMLVWRWTKPSSFSDSER___________	Q8NC56	Q8NC56	LEMD2	LEM domain-containing protein 2
675	psites	tmt	0	1.19141	1.02725	0.0502316	1.22388	0.106953	0.0625691	0.834648	S	204	___1	KTEFLDLDNSPLSPPSPRTKSRTHTRALKKL	Q8NCF5	Q8NCF5	NFATC2IP	NFATC2-interacting protein
676	psites	tmt	0	1.0431	1.00984	0.0604477	1.05336	0.0217335	0.225478	0.835963	S	216	___1	TASAHLPAPAAVGRRSPVSTRPLPSASQKAG	Q8ND56	Q8ND56	LSM14A	Protein LSM14 homolog A
677	psites	tmt	0	1.04412	0.962959	0.010595	1.00545	0.0462171	0.122062	0.834648	S	326	___1	DKYKDLRRSARKRSASADNLTLPRWSPAIIS	Q8ND76	Q8ND76	CCNY	Cyclin-Y
678	psites	tmt	0	0.649002	1.38593	0.254754	0.899472	0.397599	0.193252	0.834648	S	552	___1	LYSDRDRTFLEGDWTSPSKSSDRRNSLEGYS	Q8NDT2	Q8NDT2	RBM15B	Putative RNA-binding protein 15B
679	psites	tmt	0	1.907	0.739889	0.168915	1.41096	0.432901	0.216316	0.834814	S	228	___1	PPKQGKEKAKKAEQGSEEEGEGEEEEEEGGE	Q8NE71	Q8NE71	ABCF1	ATP-binding cassette sub-family F member 1
680	psites	tmt	0	1.13052	0.95199	0.0572163	1.07625	0.2972	0.593725	0.941922	S	166	___1	PKPAKPEKNRINKAVSEEQQPALKGKKGKEE	Q8NE71	Q8NE71	ABCF1	ATP-binding cassette sub-family F member 1
681	psites	tmt	0	1.02778	1.00948	0.0590691	1.03753	0.0827133	0.747359	0.98231	S	109	___1	EKELMERLKKLSVPTSDEEDEVPAPKPRGGK	Q8NE71	Q8NE71	ABCF1	ATP-binding cassette sub-family F member 1
682	psites	tmt	0	0.924053	1.05964	0.124883	0.979163	0.0951937	0.378088	0.879147	S	22	___1	QQPPEPEWIGDGESTSPSDKVVKKGKKDKKI	Q8NE71	Q8NE71	ABCF1	ATP-binding cassette sub-family F member 1
683	psites	tmt	0	1.08496	1.05524	0.0477249	1.1449	0.000451252	0.135507	0.834648	S	133	___1	RERSPYKRDNTFFRESPVGRKDSPHSRSGSS	Q8NEY8	Q8NEY8	PPHLN1	Periphilin-1
684	psites	tmt	0	0.926937	1.12052	0.275797	1.03865	0.134027	0.787802	0.986664	S	544	___1	EKKKKMNEKRKREEGSDIEDEDMEELLNDTR	Q8NHQ9	Q8NHQ9	DDX55	ATP-dependent RNA helicase DDX55
685	psites	tmt	0	0.919683	1.12654	0.108247	1.03606	0.0704141	0.255725	0.855001	S	594	___1	LTTGKRTIKTVDLGISDLEDDC_________	Q8NHQ9	Q8NHQ9	DDX55	ATP-dependent RNA helicase DDX55
686	psites	tmt	0	0.886688	1.11379	0.0306854	0.987587	0.0140212	0.0372872	0.834648	S	516	___1	AKLVTSGAESGNLNTSPSSNQTRNSEKFEKP	Q8NHV4	Q8NHV4	NEDD1	Protein NEDD1
687	psites	tmt	0	0.859202	1.12077	0.0261901	0.962967	0.103185	0.177429	0.834648	S	645	___1	PFTLVCCRRLFDDEASVDEPRRTETSLPETE	Q8NI35	Q8NI35	INADL	InaD-like protein
688	psites	tmt	0	0.756424	1.01774	0.357437	0.769842	0.0538119	0.444253	0.900016	S	335	___1	TVNKWTLKGIHNFRASGDYDNDCTNPITPLC	Q8TAF3	Q8TAF3	WDR48	WD repeat-containing protein 48
689	psites	tmt	0	1.0081	1.01708	0.087546	1.02532	0.170361	0.986084	1	S	52	___1	VPEPGLDLSLSPRPDSPQPRHGSPGRRKGRA	Q8TAP8	Q8TAP8	PPP1R35	Protein phosphatase 1 regulatory subunit 35
690	psites	tmt	0	0.850971	1.08317	0.114794	0.921747	0.148828	0.132053	0.834648	S	283	___1	RRKKISAKTLTDEVNSPDSDRRDKKGGNYKK	Q8TAQ2	Q8TAQ2	SMARCC2	SWI/SNF complex subunit SMARCC2
691	psites	tmt	0	0.833334	1.03722	0.0450681	0.864351	0.114165	0.167094	0.834648	S	136	___1	AETDGPEKGDQKGKASPFEEDQNRDLKQGDD	Q8TB72	Q8TB72	PUM2	Pumilio homolog 2
692	psites	tmt	0	1.02986	1.05014	0.178206	1.0815	0.0729493	0.700195	0.970383	S	75	___1	GPGRPLPTFPTSECTSDVEPDTREMVRAQNK	Q8TDD1	Q8TDD1	DDX54	ATP-dependent RNA helicase DDX54
693	psites	tmt	0	0.782975	1.08439	0.324656	0.849047	0.0439459	0.290762	0.858718	S	782	___1	LYQKWKQKQKIDDRDSDEEGASDRRGPERRG	Q8TDD1	Q8TDD1	DDX54	ATP-dependent RNA helicase DDX54
694	psites	tmt	0	1.10087	1.12674	0.713418	1.2404	0.54562	0.719028	0.973272	S	726	___1	LKRKRESERTFSRSGSISVKIIRHDSRQDSK	Q8TF01	Q8TF01	PNISR	Arginine/serine-rich protein PNISR
695	psites	tmt	0	0.973053	1.23163	0.220821	1.19845	0.197814	0.917076	0.991742	S	290	___1	EGGDGPRLPQRSKFDSDEEEEDTENVEAASS	Q8TF01	Q8TF01	PNISR	Arginine/serine-rich protein PNISR
696	psites	tmt	0	1.14424	0.932258	0.130779	1.06673	0.120855	0.167598	0.834648	S	910	___1	SSEPEREPEWRDRPGSPESPLLDAPFSRAYR	Q8TF72	Q8TF72	SHROOM3	Protein Shroom3
697	psites	tmt	0	0.93609	1.08297	0.199809	1.01376	0.15344	0.76273	0.98551	S	134	___1	SSPRTPLYLQPDAYGSLDRATSPRPRAFDGA	Q8WUF5	Q8WUF5	PPP1R13L	RelA-associated inhibitor
698	psites	tmt	0	0.991316	1.03692	0.0843365	1.02792	0.0625885	0.8916	0.987496	S	155	___1	LPSDPPEHFPLRKTVSEPNLKLRYKPKKSLE	Q8WUI4	Q8WUI4	HDAC7	Histone deacetylase 7
699	psites	tmt	0	1.01736	0.9803	0.111264	0.997315	0.115056	0.840656	0.986664	S	871	___1	AEASARVENSPQVDGSPPGLEGLLGGIGEKG	Q8WVB6	Q8WVB6	CHTF18	Chromosome transmission fidelity protein 18 homolog
700	psites	tmt	0	1.04261	0.948277	0.059762	0.98868	0.155428	0.691691	0.9695	S	658	___1	EDDDKANKKHKKYVISDEEEEDDD_______	Q8WVC0	Q8WVC0	LEO1	RNA polymerase-associated protein LEO1
701	psites	tmt	0	0.855975	1.29512	0.323048	1.10859	0.22375	0.554839	0.936012	S	303	___1	HLNRVNLEESSGVENSPAGARPKRKNKKSYD	Q8WVM8	Q8WVM8	SCFD1	Sec1 family domain-containing protein 1
702	psites	tmt	0	1.00284	0.997585	0.0335732	1.00042	0.0760067	0.981828	1	S	119	___1	PKTLSVAAAFNEDEDSEPEEMPPEAKMRMKN	Q8WW12	Q8WW12	PCNP	PEST proteolytic signal-containing nuclear protein
703	psites	tmt	0	0.958286	1.02455	0.0251241	0.981812	0.179365	0.557455	0.936012	S	1510	___1	NKEPVSLPGIMRRGESLDNLDSPRSNSWRQP	Q8WWI1	Q8WWI1	LMO7	LIM domain only protein 7
704	psites	tmt	0	1.1164	0.974732	0.0984578	1.08819	0.0174636	0.25319	0.855001	S	1493	___1	TPLHNDNSWIRQRSASVNKEPVSLPGIMRRG	Q8WWI1	Q8WWI1	LMO7	LIM domain only protein 7
705	psites	tmt	0	0.903379	1.01814	0.0620488	0.919768	0.0318929	0.0661226	0.834648	S	867	___1	KREDRVTTEIQLPSQSPVEEQSPASLSSLRS	Q8WWI1	Q8WWI1	LMO7	LIM domain only protein 7
706	psites	tmt	0	1.01607	1.04148	0.0847367	1.05821	0.101759	0.836776	0.986664	S	111	___1	IGSARGQSTGKGPPQSPVFEGVYNNSRMLHF	Q8WWM7	Q8WWM7	ATXN2L	Ataxin-2-like protein
707	psites	tmt	0	0.758214	1.32123	0.0532918	1.00178	0.0750924	0.0509648	0.834648	S	1783	___1	TRNQGRRTAFYNEDDSEEEQRQLLFEDTSLT	Q8WWQ0	Q8WWQ0	PHIP	PH-interacting protein
708	psites	tmt	0	0.602788	1.1047	0.136967	0.6659	0.166987	0.0801512	0.834648	S	557	___1	SQLGEKLEQLDHRKPSPAQAAETPALELPLP	Q8WX92	Q8WX92	NELFB	Negative elongation factor B
709	psites	tmt	0	0.914637	1.02703	0.0676877	0.939358	0.170557	0.342785	0.874972	S	403	___1	PRVGLSPDSPAGDRNSVGSEGSVGSIRSAGS	Q8WXE0	Q8WXE0	CASKIN2	Caskin-2
710	psites	tmt	0	0.949065	1.00771	0.124644	0.956385	0.0981493	0.616967	0.948	S	486	___1	QEQEIEQRLQQQAALSPTTAPAVSSVSKQET	Q8WXI9	Q8WXI9	GATAD2B	Transcriptional repressor p66-beta
711	psites	tmt	0	0.983985	0.999277	0.0935445	0.983274	0.160838	0.849663	0.986664	S	1198	___1	SLITPGLPSMHYPRISPTAGNQNGLLNKTPP	Q8WXX7	Q8WXX7	AUTS2	Autism susceptibility gene 2 protein
712	psites	tmt	0	1.05117	0.987495	0.110821	1.03803	0.11162	0.611888	0.948	S	366	___1	TKPTPIPPPRLKKQASFLEAEGGAKTLSGGR	Q8WYP3	Q8WYP3	RIN2	Ras and Rab interactor 2
713	psites	tmt	0	1.00952	1.00418	0.139356	1.01374	0.0307776	0.90189	0.989979	S	486	___1	ETMAPPIKSKKKRSSSFVLPKLVKSQLQKVS	Q8WYP3	Q8WYP3	RIN2	Ras and Rab interactor 2
714	psites	tmt	0	0.939909	1.19793	0.0854626	1.12594	0.0923017	0.442236	0.897566	S	1541	___1	EKLEAQDSGEEARNLSFNELYPSGTLKLQYN	Q8WYP5	Q8WYP5	AHCTF1	Protein ELYS
715	psites	tmt	0	1.15377	0.95357	0.128919	1.1002	0.124953	0.230087	0.843254	S	1160	___1	YLVSRSLPSSSQLKGSPQAISRASELHLLET	Q8WYP5	Q8WYP5	AHCTF1	Protein ELYS
716	psites	tmt	0	0.994415	1.02811	0.151464	1.02236	0.0810971	0.989315	1	S	1222	___1	LRSTPLASPSPSPGRSPQRLKETRISFVEED	Q8WYP5	Q8WYP5	AHCTF1	Protein ELYS
717	psites	tmt	0	1.02449	1.08776	0.068768	1.1144	0.117529	0.775026	0.986664	S	31	___1	GMAKKVTKAGGSAALSPSKKRKNSKKKNQPG	Q92522	Q92522	H1FX	Histone H1x
718	psites	tmt	0	0.555568	1.37234	0.378599	0.762431	0.0671957	0.0575519	0.834648	S	1642	___1	GNVSCSENLVANTARSPQFINLKRDPRQAAG	Q92576	Q92576	PHF3	PHD finger protein 3
719	psites	tmt	0	1.00899	1.07118	0.0253277	1.08081	0.0826003	0.881246	0.986664	S	809	___1	NTCEPVVTQPKPKIESPKLERTPNGPNIDKK	Q92598	Q92598	HSPH1	Heat shock protein 105 kDa
720	psites	tmt	0	0.967469	0.951107	0.176434	0.920167	0.0280161	0.847637	0.986664	S	2020	___1	SSSPTSYWKSLAPDRSDDEHDPLDNTSRPRY	Q92614	Q92614	MYO18A	Unconventional myosin-XVIIIa
721	psites	tmt	0	1.06538	0.995802	0.108862	1.06091	0.242818	0.787475	0.986664	S	647	___1	TCSPTEDATMGSRSESLSNCSIGKKRLEKSP	Q92625	Q92625	ANKS1A	Ankyrin repeat and SAM domain-containing protein 1A
722	psites	tmt	0	1.22321	0.965025	0.0379191	1.18043	0.0361858	0.0322174	0.834648	S	663	___1	LSNCSIGKKRLEKSPSFASEWDEIEKIMSSI	Q92625	Q92625	ANKS1A	Ankyrin repeat and SAM domain-containing protein 1A
723	psites	tmt	0	0.875085	1.05813	0.231924	0.925952	0.143622	0.462399	0.902495	S	151	___1	TGGEAKSIPLECPLSSPKGVLFSSKSAEVCK	Q92667	Q92667	AKAP1	A-kinase anchor protein 1, mitochondrial
724	psites	tmt	0	1.06284	0.986441	0.142274	1.04842	0.335945	0.878532	0.986664	S	267	___1	AALQVTKQITQEEDDSDEEVAPENFFSLPEK	Q92733	Q92733	PRCC	Proline-rich protein PRCC
725	psites	tmt	0	1.04267	0.984331	0.0414033	1.02633	0.155874	0.700692	0.970383	S	716	___1	LPVDTGAGGYSGNSGSPKNGKLIIPPVDYLP	Q92738	Q92738	USP6NL	USP6 N-terminal-like protein
726	psites	tmt	0	0.810393	1.12525	0.10702	0.911892	0.125392	0.0388249	0.834648	S	1475	___1	GEAPAEKLAEETEGPSDGESAAEKRSSEKSD	Q92766	Q92766	RREB1	Ras-responsive element-binding protein 1
727	psites	tmt	0	0.942643	1.05163	0.36068	0.991309	0.386999	0.848422	0.986664	S	1653	___1	AGWPSEPGQGDLNPESPAALGQDLLEPRSKR	Q92766	Q92766	RREB1	Ras-responsive element-binding protein 1
728	psites	tmt	0	0.759354	1.19972	0.303323	0.911011	0.407764	0.385203	0.880719	S	394	___1	GVQMQAIPEDAVHEDSGDEDGEDPDKRISIR	Q92769	Q92769	HDAC2	Histone deacetylase 2
729	psites	tmt	0	1.21073	0.965359	0.265096	1.16879	0.256937	0.337113	0.868922	S	142	___1	PLEKRGAPDPRVDDDSLGEFPVTNSRARKRI	Q92785	Q92785	DPF2	Zinc finger protein ubi-d4
730	psites	tmt	0	0.893002	1.05233	0.0939862	0.939734	0.075734	0.31901	0.858718	S	213	___1	VRTLSNAEDYLDDEDSD______________	Q92882	Q92882	OSTF1	Osteoclast-stimulating factor 1
731	psites	tmt	0	1.10575	0.984696	0.100462	1.08883	0.0413236	0.108931	0.834648	S	1107	___1	SYLGDEFKSQIDVALSQDSTYQGERAYQHGG	Q92900	Q92900	UPF1	Regulator of nonsense transcripts 1
732	psites	tmt	0	1.19092	0.911596	0.158323	1.08564	0.211507	0.30239	0.858718	S	480	___1	PPNGDPNFKLFIIRGSPQQIDHAKQLIEEKI	Q92945	Q92945	KHSRP	Far upstream element-binding protein 2
733	psites	tmt	0	0.942249	0.897976	0.0754209	0.846116	0.11274	0.481835	0.90494	S	274	___1	LQERAGVKMILIQDGSQNTNVDKPLRIIGDP	Q92945	Q92945	KHSRP	Far upstream element-binding protein 2
734	psites	tmt	0	1.04807	0.937108	0.13024	0.982153	0.0303012	0.460805	0.902495	S	181	___1	QINKIQQDSGCKVQISPDSGGLPERSVSLTG	Q92945	Q92945	KHSRP	Far upstream element-binding protein 2
735	psites	tmt	0	1.41504	0.913075	0.238931	1.29204	0.239825	0.28755	0.858584	S	886	___1	AEAPWARRPVDPRRRSLPAGDALYLSFNPPQ	Q92974	Q92974	ARHGEF2	Rho guanine nucleotide exchange factor 2
736	psites	tmt	0	1.55841	1.01131	0.140144	1.57603	0.0172629	0.0464301	0.834648	S	269	___1	KSQLKTQEDEEEISTSPGVSEFVSDAFDACN	Q96A49	Q96A49	SYAP1	Synapse-associated protein 1
737	psites	tmt	0	1.06716	0.986357	0.182067	1.0526	0.0520713	0.516826	0.927429	S	24	___1	ATGIPSSKVKYSRLSSTDDGYIDLQFKKTPP	Q96A57	Q96A57	TMEM230	Transmembrane protein 230
738	psites	tmt	0	1.26245	0.96195	0.105553	1.21441	0.251663	0.266213	0.855969	S	630	___1	WAEYYRQQAAYYAQTSPQGMPQHPPAPQGQ_	Q96AE4	Q96AE4	FUBP1	Far upstream element-binding protein 1
739	psites	tmt	0	1.0241	1.00118	0.0846892	1.02531	0.166897	0.866456	0.986664	S	409	___1	TKPNRRVRKSEPLDESDNDF___________	Q96AJ1	Q96AJ1	CLUAP1	Clusterin-associated protein 1
740	psites	tmt	0	1.10646	1.02115	0.027496	1.12986	0.123777	0.391315	0.887288	S	50	___1	TKRIQPQPPDEDGDHSDKEDEQPQVVVLKKG	Q96AT1	Q96AT1	KIAA1143	Uncharacterized protein KIAA1143
741	psites	tmt	0	0.980505	0.985664	0.0681139	0.966449	0.0538643	0.783688	0.986664	S	146	___1	VKKNSQKQIKNSSLLSFDNEDENE_______	Q96AT1	Q96AT1	KIAA1143	Uncharacterized protein KIAA1143
742	psites	tmt	0	0.949487	1.06375	0.262334	1.01002	0.0640862	0.858507	0.986664	S	272	___1	KLNSDDTYQTALLSGSDEE____________	Q96B21	Q96B21	TMEM45B	Transmembrane protein 45B
743	psites	tmt	0	0.847644	1.36834	0.247865	1.15987	0.534675	0.466062	0.902622	S	183	___1	SVPPASALPTQQYAKSLPVSVPVWGFKEKRT	Q96B36	Q96B36	AKT1S1	Proline-rich AKT1 substrate 1
744	psites	tmt	0	1.0007	0.961467	0.0977563	0.962144	0.0827544	0.982224	1	S	587	___1	SPLSSSLGTAGHRANSPSLFGTEGKPKMEPA	Q96B97	Q96B97	SH3KBP1	SH3 domain-containing kinase-binding protein 1
745	psites	tmt	0	0.961528	1.02765	0.0633745	0.988115	0.0751455	0.446672	0.902495	S	74	___1	LLRRADLNQGIGEPQSPSRRVFNPYTEFKEF	Q96C19	Q96C19	EFHD2	EF-hand domain-containing protein D2
746	psites	tmt	0	1.23244	0.878657	0.176213	1.08289	0.102743	0.277368	0.855969	S	378	___1	PPPLTLGKTGLSRSVSCDNVSKVGLPSPSSL	Q96CB8	Q96CB8	INTS12	Integrator complex subunit 12
747	psites	tmt	0	1.09778	0.905321	0.148364	0.993843	0.0772591	0.374949	0.879147	S	468	___1	RKNVNIYRDSAIPVESDTDDEGAPRISLAEM	Q96D46	Q96D46	NMD3	60S ribosomal export protein NMD3
748	psites	tmt	0	0.666771	1.38412	0.168341	0.922893	0.379666	0.28374	0.855969	S	76	___1	NSTTFPSRHGLLLPASPVRMHSSRLHQIKQE	Q96E09	Q96E09	FAM122A	Protein FAM122A
749	psites	tmt	0	0.951465	1.00209	0.0833056	0.953453	0.167808	0.622336	0.948	S	170	___1	PVPKPRGLSRDMQGLSLDAASQPSKGGLLER	Q96EY5	Q96EY5	MVB12A	Multivesicular body subunit 12A
750	psites	tmt	0	0.899573	1.09978	0.108354	0.989333	0.124829	0.327837	0.865081	S	282	___1	QTVQPLPKGDQVLNFSDAEDLIDDSKLKDMR	Q96EZ8	Q96EZ8	MCRS1	Microspherule protein 1
751	psites	tmt	0	0.965224	1.12925	0.123131	1.08997	0.272559	0.719098	0.973272	S	131	___1	NIPKRTDVKSQDVAVSPQQQQCSKSYVDRHM	Q96F86	Q96F86	EDC3	Enhancer of mRNA-decapping protein 3
752	psites	tmt	0	1.17549	0.946202	0.186005	1.11225	0.137724	0.195331	0.834648	S	5	___1	___________MAADSDDGAVSAPAASDGGV	Q96GM8	Q96GM8	TOE1	Target of EGR1 protein 1
753	psites	tmt	0	0.807575	1.12011	0.145437	0.904572	0.294305	0.430119	0.897566	S	92	___1	LPGEPGNGPDQQLQRSPPEFQ__________	Q96GX2	Q96GX2	ATXN7L3B	Putative ataxin-7-like protein 3B
754	psites	tmt	0	0.914979	1.0612	0.229471	0.970978	0.0580899	0.695322	0.9695	S	360	___1	SDRASLFVARTRRSNSSEALLVDRAAGGGAG	Q96HB5	Q96HB5	CCDC120	Coiled-coil domain-containing protein 120
755	psites	tmt	0	1.02223	1.04158	0.120802	1.06473	0.242338	0.996817	1	S	252	___1	ADRPSSLPLDFNDEFSDLDGVVQQRRQDMEG	Q96HH9	Q96HH9	GRAMD3	GRAM domain-containing protein 3
756	psites	tmt	0	1.14461	0.886038	0.0951128	1.01417	0.212981	0.438957	0.897566	S	569	___1	QVAFYGQTLGQAQAHSQEQ____________	Q96I24	Q96I24	FUBP3	Far upstream element-binding protein 3
757	psites	tmt	0	0.940796	1.04629	0.256906	0.984345	0.170089	0.753986	0.984326	S	476	___1	ASLDFPESQKSSRGGSPDLWKSSFFIEPQKP	Q96JM3	Q96JM3	CHAMP1	Chromosome alignment-maintaining phosphoprotein 1
758	psites	tmt	0	0.764207	1.30579	0.219521	0.997892	0.422268	0.353691	0.874972	S	921	___1	QRQQQARASEAASQASPSAVTSKPRKPPTPP	Q96JP2	Q96JP2	MYO15B	Unconventional myosin-XVB
759	psites	tmt	0	0.906589	1.00378	0.152408	0.910017	0.170449	0.413282	0.896798	S	1025	___1	EEEQEEQEVETRAVPSPPPPPIVKKPLKQGG	Q96JP2	Q96JP2	MYO15B	Unconventional myosin-XVB
760	psites	tmt	0	1.17028	0.918276	0.222343	1.07464	0.122419	0.231594	0.845101	S	354	___1	QDPERVTLQDYRLPDSDDDEDEETAIQRVLQ	Q96K21	Q96K21	ZFYVE19	Abscission/NoCut checkpoint regulator
761	psites	tmt	0	1.27295	0.930908	0.0416325	1.185	0.156412	0.176769	0.834648	S	144	___1	HEVLTRGSSANASKWSPPQNYKKRVAALEAK	Q96K21	Q96K21	ZFYVE19	Abscission/NoCut checkpoint regulator
762	psites	tmt	0	0.845193	1.254	0.0552392	1.05987	0.0851609	0.142648	0.834648	S	1054	___1	SQRFNIHNNRKRRRDSDGVDGFEAEGKKDKK	Q96KR1	Q96KR1	ZFR	Zinc finger RNA-binding protein
763	psites	tmt	0	1.02969	1.06906	0.00151476	1.10081	0.112843	0.719235	0.973272	S	116	___1	KLLVEKKFLALQSKNSDADFQNNEKFVQFKQ	Q96MF7	Q96MF7	NSMCE2	E3 SUMO-protein ligase NSE2
764	psites	tmt	0	1.08156	0.895741	0.183245	0.968801	0.0265395	0.577867	0.936474	S	76	___1	AVGGLGWNSRSPRTQSPGGCSAEAVLARKKH	Q96MH2	Q96MH2	HEXIM2	Protein HEXIM2
765	psites	tmt	0	1.10475	1.00164	0.10179	1.10656	0.0520192	0.336453	0.868922	S	30	___1	VAAEVRKQISGQYSGSPQLLKNLNIVGNISH	Q96N67	Q96N67	DOCK7	Dedicator of cytokinesis protein 7
766	psites	tmt	0	1.00542	1.00666	0.116698	1.01212	0.21861	0.961576	0.999803	S	900	___1	RPASLNLNRSRSLSNSNPDISGTPTSPDDEV	Q96N67	Q96N67	DOCK7	Dedicator of cytokinesis protein 7
767	psites	tmt	0	1.21174	0.959552	0.287738	1.16273	0.620561	0.81416	0.986664	S	1438	___1	IASPPERSPSGSAFGSQENLRWRKDMTHWRQ	Q96N67	Q96N67	DOCK7	Dedicator of cytokinesis protein 7
768	psites	tmt	0	1.30423	0.98234	0.26342	1.28119	0.0965144	0.145901	0.834648	S	351	___1	LTIKELQKKEEENADSDDEGELQDLLSQDWR	Q96NB3	Q96NB3	ZNF830	Zinc finger protein 830
769	psites	tmt	0	1.29253	0.925249	0.183329	1.19591	0.175065	0.150672	0.834648	S	229	___1	EIPPKPVRLFPEFDDSDYDEVPEEGPGAPAR	Q96P48	Q96P48	ARAP1	Arf-GAP with Rho-GAP domain, ANK repeat and PH domain-containing protein 1
770	psites	tmt	0	0.821976	1.10022	0.160036	0.904354	0.154766	0.136443	0.834648	S	667	___1	GQSKKQPSGTTKRPISDDDCPSASKVYKASD	Q96PU4	Q96PU4	UHRF2	E3 ubiquitin-protein ligase UHRF2
771	psites	tmt	0	1.22029	0.980803	0.04951	1.19686	0.19558	0.316532	0.858718	S	448	___1	NNHLIEPQIRRPRSLSSPTVTLSAPLEGAKD	Q96PU5	Q96PU5	NEDD4L	E3 ubiquitin-protein ligase NEDD4-like
772	psites	tmt	0	0.849663	1.27607	0.109717	1.08423	0.271218	0.48306	0.906234	S	492	___1	GGSRRLSLPGLLSQVSPRLLRKAARVKTRTV	Q96Q42	Q96Q42	ALS2	Alsin
773	psites	tmt	0	1.12034	1.07552	0.0972993	1.20494	0.0934896	0.217383	0.835963	S	101	___1	SLGDFIEHYAQLGPSSPEQLAAGAEEGGGPR	Q96QR8	Q96QR8	PURB	Transcriptional activator protein Pur-beta
774	psites	tmt	0	1.04564	0.955824	0.0747537	0.999453	0.195136	0.808091	0.986664	S	904	___1	LQSVPSAPPPKAQSVSPVQAPPPGGSAQLLP	Q96RK0	Q96RK0	CIC	Protein capicua homolog
775	psites	tmt	0	1.07629	1.04001	0.0749787	1.11936	0.096296	0.368371	0.876797	S	230	___1	SSYRDMPGGFLFEGLSDDEDDFHPNTRSTPS	Q96S82	Q96S82	UBL7	Ubiquitin-like protein 7
776	psites	tmt	0	1.01143	1.07738	0.330305	1.0897	0.14919	0.908567	0.989979	S	369	___1	NTKRRLEGAKKAKADSPVNGLPKGRESRSRS	Q96S94	Q96S94	CCNL2	Cyclin-L2
777	psites	tmt	0	0.91784	0.981616	0.140785	0.900967	0.0725893	0.442076	0.897566	S	330	___1	LLPGGTQVLDGTSGFSPAPKLVESPKEGKGS	Q96S94	Q96S94	CCNL2	Cyclin-L2
778	psites	tmt	0	0.853959	1.23176	0.184422	1.05187	0.363977	0.410797	0.896798	S	51	___1	HSESDLPEQEEEILGSDDDEQEDPNDYCKGG	Q96SB4	Q96SB4	SRPK1	SRSF protein kinase 1
779	psites	tmt	0	0.719233	1.22275	0.324156	0.879445	0.376108	0.314026	0.858718	S	292	___1	VGGHRHPPGGGGGQRSLSPGGAALGYRDYRL	Q96T37	Q96T37	RBM15	Putative RNA-binding protein 15
780	psites	tmt	0	0.811582	1.07739	0.112981	0.874389	0.301046	0.306019	0.858718	S	294	___1	GHRHPPGGGGGQRSLSPGGAALGYRDYRLQQ	Q96T37	Q96T37	RBM15	Putative RNA-binding protein 15
781	psites	tmt	0	1.72489	0.804926	0.491835	1.38841	0.452319	0.375587	0.879147	S	646	___1	VGLPFEASPESPPPASPDGVTEIRGLLAQGL	Q96TA1	Q96TA1	FAM129B	Niban-like protein 1
782	psites	tmt	0	1.0441	0.923248	0.198036	0.96396	0.161073	0.714037	0.972472	S	665	___1	VTEIRGLLAQGLRPESPPPAGPLLNGAPAGE	Q96TA1	Q96TA1	FAM129B	Niban-like protein 1
783	psites	tmt	0	1.08297	1.0017	0.0143054	1.0848	0.205725	0.684469	0.967752	S	46	___1	YSQRWKRTQRHGRSQSLPNSLDYTQTSDPGR	Q96TC7	Q96TC7	RMDN3	Regulator of microtubule dynamics protein 3
784	psites	tmt	0	1.02099	1.00153	0.0474902	1.02256	0.144729	0.872432	0.986664	S	51	___1	EDNDAAARGAEAFGDSEEDGEDVFEVEKILD	Q99549	Q99549	MPHOSPH8	M-phase phosphoprotein 8
785	psites	tmt	0	1.08261	1.00174	0.0894767	1.08448	0.291302	0.713677	0.972472	S	730	___1	WESRVQAYEEPSVASSPNGKESDLRRSEVPC	Q99575	Q99575	POP1	Ribonucleases P/MRP protein subunit POP1
786	psites	tmt	0	0.856633	1.14716	0.131596	0.982692	0.201749	0.447249	0.902495	S	902	___1	TSRENKRSQPRVKDSSPGEKSRSQSRERESD	Q99590	Q99590	SCAF11	Protein SCAF11
787	psites	tmt	0	1.03751	1.04608	0.0825244	1.08531	0.10902	0.748797	0.98231	S	148	___1	QIVSASVLQNKFSPPSPLPQAVFSTSSRFWS	Q99594	Q99594	TEAD3	Transcriptional enhancer factor TEF-5
788	psites	tmt	0	0.981726	1.01577	0.208805	0.99721	0.100687	0.966935	1	S	39	___1	TKPVGGNYGKQPLLLSEDEEDTKRVVRSAKD	Q99613	Q99613	EIF3C;EIF3CL	Eukaryotic translation initiation factor 3 subunit C;Eukaryotic translation initiation factor 3 subunit C-like protein
789	psites	tmt	0	0.937599	0.940308	0.0933081	0.881632	0.0335302	0.467046	0.902871	S	209	___1	KVLGRSPLTILQDDNSPGTLTLRQGKRPSPL	Q99618	Q99618	CDCA3	Cell division cycle-associated protein 3
790	psites	tmt	0	1.23341	1.02178	0.262284	1.26028	0.176591	0.284188	0.855969	S	87	___1	GIARTPMKTSSGDPPSPLVKQLSEVFETEDS	Q99618	Q99618	CDCA3	Cell division cycle-associated protein 3
791	psites	tmt	0	1.13704	1.02402	0.200907	1.16436	0.105438	0.344693	0.874972	S	277	___1	LATLSDTDSHSQDLGSPERHQPVPQLQAHST	Q99638	Q99638	RAD9A	Cell cycle checkpoint control protein RAD9A
792	psites	tmt	0	0.951045	0.941075	0.0838808	0.895005	0.174773	0.628076	0.94819	S	387	___1	PVRSPQGPSPVLAEDSEGEG___________	Q99638	Q99638	RAD9A	Cell cycle checkpoint control protein RAD9A
793	psites	tmt	0	0.900095	1.06006	0.208688	0.954152	0.222353	0.520846	0.930181	S	329	___1	GRRAHLTVGQAAAGGSGNLLTERSTFTDSQL	Q99959	Q99959	PKP2	Plakophilin-2
794	psites	tmt	0	1.00419	0.895825	0.0591015	0.899582	0.0365401	0.908612	0.989979	S	288	___1	GGFPCTTAPKIAASSSFRSSDKPIRTPSRSM	Q99961	Q99961	SH3GL1	Endophilin-A2
795	psites	tmt	0	1.35995	0.954656	0.25986	1.29828	0.17256	0.0731341	0.834648	S	1015	___1	EKSKLNLAQFLNEDLS_______________	Q9BPX3	Q9BPX3	NCAPG	Condensin complex subunit 3
796	psites	tmt	0	1.04884	1.10504	0.0577093	1.15901	0.38624	0.993036	1	S	674	___1	TKKIKTLHCEGTEINSDDEQESKEVEETATA	Q9BPX3	Q9BPX3	NCAPG	Condensin complex subunit 3
797	psites	tmt	0	0.878055	1.20836	0.265533	1.06101	0.15496	0.547441	0.936012	S	488	___1	VSGRRGIAIAYEDEGSG______________	Q9BQC3	Q9BQC3	DPH2	Diphthamide biosynthesis protein 2
798	psites	tmt	0	1.04739	0.966847	0.0471448	1.01267	0.0670409	0.315623	0.858718	S	1163	___1	KLEKKDAKEIPSATQSPISKKRKKKGFLPET	Q9BQG0	Q9BQG0	MYBBP1A	Myb-binding protein 1A
799	psites	tmt	0	1.27613	0.86274	0.0866167	1.10097	0.201124	0.132689	0.834648	S	1267	___1	QKKNQKPSQVNGAPGSPTEPAGQKQHQKALP	Q9BQG0	Q9BQG0	MYBBP1A	Myb-binding protein 1A
800	psites	tmt	0	1.23686	0.914541	0.0926406	1.13116	0.130072	0.0839305	0.834648	S	343	___1	YTEKKKNQNIQKPEYSE______________	Q9BQP7	Q9BQP7	MGME1	Mitochondrial genome maintenance exonuclease 1
801	psites	tmt	0	0.999189	0.97241	0.0987389	0.971621	0.0540165	0.976731	1	S	201	___1	KAPAPLGTVADSLRASDGQLQAKAPTKPPRT	Q9BRG2	Q9BRG2	SH2D3A	SH2 domain-containing protein 3A
802	psites	tmt	0	1.13487	0.932429	0.0670085	1.05819	0.153046	0.271212	0.855969	S	180	___1	MEASTMPISALPRTSSDPVLLKAPAPLGTVA	Q9BRG2	Q9BRG2	SH2D3A	SH2 domain-containing protein 3A
803	psites	tmt	0	0.99774	0.941411	0.058066	0.939284	0.0701745	0.952033	0.997351	S	175	___1	VQKAEALMRELDEEGSDPPLPGRAQRIRQVL	Q9BRJ6	Q9BRJ6	C7orf50	Uncharacterized protein C7orf50
804	psites	tmt	0	1.06104	1.00153	0.126783	1.06267	0.102504	0.477644	0.90494	S	22	___1	LMSRVVPGQFDDADSSDSENRDLKTVKEKDD	Q9BRS2	Q9BRS2	RIOK1	Serine/threonine-protein kinase RIO1
805	psites	tmt	0	0.732582	1.34484	0.0637113	0.985208	0.1185	0.0812475	0.834648	S	448	___1	TPAPRKPPQALAKQGSLYHEMAIEPLDDIAA	Q9BST9	Q9BST9	RTKN	Rhotekin
806	psites	tmt	0	0.996311	1.07707	0.0908612	1.0731	0.0831484	0.96209	0.999803	S	543	___1	HSPRARSVAPLPPQRSPRTRGLCSKGQPRTW	Q9BST9	Q9BST9	RTKN	Rhotekin
807	psites	tmt	0	0.843939	1.21145	0.11995	1.02239	0.0271232	0.0747326	0.834648	S	520	___1	PDWTHPLPWGRPRTFSLDAVPPDHSPRARSV	Q9BST9	Q9BST9	RTKN	Rhotekin
808	psites	tmt	0	1.21168	0.85996	0.322812	1.04199	0.103038	0.270649	0.855969	S	529	___1	GRPRTFSLDAVPPDHSPRARSVAPLPPQRSP	Q9BST9	Q9BST9	RTKN	Rhotekin
809	psites	tmt	0	0.905996	1.13095	0.111398	1.02463	0.124998	0.277458	0.855969	S	53	___1	SGDHRHEKMRDAGDPSPPNKMLRRSDSPENK	Q9BTA9	Q9BTA9	WAC	WW domain-containing adapter protein with coiled-coil
810	psites	tmt	0	0.795615	1.09317	0.204361	0.869739	0.056146	0.283877	0.855969	S	237	___1	GRDLFSLDSEDPSPASPPLRSSGSSLFPRQR	Q9BTK6	Q9BTK6	PAGR1	PAXIP1-associated glutamate-rich protein 1
811	psites	tmt	0	1.20705	1.09426	0.323474	1.32083	0.151861	0.386868	0.880719	S	152	___1	RRLAAAEETAVSPRKSPRPAGPQLFLPDPDP	Q9BUH6	Q9BUH6	C9orf142	Protein PAXX
812	psites	tmt	0	0.730825	1.08492	0.136274	0.792886	0.179298	0.0297715	0.834648	S	148	___1	WSLERRLAAAEETAVSPRKSPRPAGPQLFLP	Q9BUH6	Q9BUH6	C9orf142	Protein PAXX
813	psites	tmt	0	1.00001	0.916773	0.0635346	0.916782	0.0520314	0.992758	1	S	194	___1	RGRGYFEHREDRRGRSPQPPAEEDEDDFDDT	Q9BUJ2	Q9BUJ2	HNRNPUL1	Heterogeneous nuclear ribonucleoprotein U-like protein 1
814	psites	tmt	0	1.183	0.85496	0.0655866	1.01141	0.0925807	0.173183	0.834648	S	512	___1	RKKRNYILDQTNVYGSAQRRKMRPFEGFQRK	Q9BUJ2	Q9BUJ2	HNRNPUL1	Heterogeneous nuclear ribonucleoprotein U-like protein 1
815	psites	tmt	0	1.43994	0.625386	0.334836	0.900521	0.0837624	0.255705	0.855001	S	491	___1	LATASGQRVFPEPTESGDEGEELGLPLLSTR	Q9BUR4	Q9BUR4	WRAP53	Telomerase Cajal body protein 1
816	psites	tmt	0	1.18186	0.935007	0.137677	1.10505	0.194753	0.197053	0.834648	S	24	___1	PLAMGLAQPRLLSGPSQESPQTLGKESRGLR	Q9BWE0	Q9BWE0	REPIN1	Replication initiator 1
817	psites	tmt	0	0.859267	0.936725	0.122079	0.804897	0.263017	0.397469	0.888673	S	86	___1	KNKSKTSTKLHVGNISPTCTNKELRAKFEEY	Q9BWF3	Q9BWF3	RBM4	RNA-binding protein 4
818	psites	tmt	0	0.791247	1.19308	0.0829839	0.944018	0.011268	0.0593157	0.834648	S	990	___1	EEAGKAEKIVISRSTSPTFNKQTKRVSWSSF	Q9BX63	Q9BX63	BRIP1	Fanconi anemia group J protein
819	psites	tmt	0	0.872983	0.996398	0.0316142	0.869839	0.176091	0.242338	0.85307	S	112	___1	LGPASPRRAGALRRNSLTGEEGQLARVSNWP	Q9BX95	Q9BX95	SGPP1	Sphingosine-1-phosphate phosphatase 1
820	psites	tmt	0	1.1369	0.927884	0.110376	1.05491	0.08065	0.312239	0.858718	S	181	___1	PPLKSRSFSLASSSNSPISQRRPSQNAISFF	Q9BXB4	Q9BXB4	OSBPL11	Oxysterol-binding protein-related protein 11
821	psites	tmt	0	1.16096	0.850101	0.126717	0.986932	0.0265757	0.23726	0.845239	S	774	___1	LRSLRSWLSLKDRQLSQEVTPADLECGLEGQ	Q9BY89	Q9BY89	KIAA1671	Uncharacterized protein KIAA1671
822	psites	tmt	0	1.01836	0.965061	0.0322587	0.982782	0.0723366	0.734346	0.979901	S	128	___1	LVGQEVGSGEGPRTSSPLFNKAVFLRPSSST	Q9BY89	Q9BY89	KIAA1671	Uncharacterized protein KIAA1671
823	psites	tmt	0	0.864536	1.13319	0.210551	0.979686	0.273755	0.41634	0.896798	S	624	___1	REKAGSPAPSNRLNDSPTLKKLDELPIFKSE	Q9BYW2	Q9BYW2	SETD2	Histone-lysine N-methyltransferase SETD2
824	psites	tmt	0	0.855921	1.06743	0.137966	0.913635	0.295285	0.535636	0.934541	S	920	___1	ERRASRRRAVSEGCASEDEVEGEA_______	Q9BYX2	Q9BYX2	TBC1D2	TBC1 domain family member 2A
825	psites	tmt	0	0.910332	1.24477	0.0798585	1.13315	0.100936	0.275593	0.855969	S	189	___1	AVGASAEGTRRDRLGSYSGPTSVSRQRVESL	Q9BZ23	Q9BZ23	PANK2	Pantothenate kinase 2, mitochondrial
826	psites	tmt	0	1.18377	1.06096	0.131908	1.25593	0.152275	0.226418	0.835963	S	578	___1	SVARSGSCSRTPRDVSGLRDVKMVKKAKTMM	Q9BZE4	Q9BZE4	GTPBP4	Nucleolar GTP-binding protein 1
827	psites	tmt	0	0.99133	0.742295	0.341588	0.735859	0.345112	0.993962	1	S	272	___1	FAKDDTIGRVGRLHGSVPNLSRYLESRDSSG	Q9BZF2	Q9BZF2	OSBPL7	Oxysterol-binding protein-related protein 7
828	psites	tmt	0	1.094	0.966291	0.0889163	1.05712	0.101433	0.312596	0.858718	S	428	___1	RGSPFKLKVIRSADVSPTTEGVKRRVKSPGS	Q9C040	Q9C040	TRIM2	Tripartite motif-containing protein 2
829	psites	tmt	0	0.780619	1.13183	0.0322399	0.883528	0.0466959	0.0252151	0.818912	S	435	___1	PTSLVQRRFSEGVLQSPSQDQEKLGGSLAAL	Q9C0C2	Q9C0C2	TNKS1BP1	182 kDa tankyrase-1-binding protein
830	psites	tmt	0	1.46782	0.754748	0.687246	1.10783	0.0658881	0.433944	0.897566	S	494	___1	TFPTRPSGLGVWRLDSPPPSPITEASEAAEA	Q9C0C2	Q9C0C2	TNKS1BP1	182 kDa tankyrase-1-binding protein
831	psites	tmt	0	1.12567	0.957541	0.128185	1.07788	0.0368211	0.182716	0.834648	S	672	___1	ETTQARTEAQDLCRASPEPPGPESSSRWLDD	Q9C0C2	Q9C0C2	TNKS1BP1	182 kDa tankyrase-1-binding protein
832	psites	tmt	0	1.43739	0.88701	0.173521	1.27498	0.0226696	0.0967075	0.834648	S	1158	___1	MEGGHFVPPGKTTAGSVDWTDQLGLRNLEVS	Q9C0C2	Q9C0C2	TNKS1BP1	182 kDa tankyrase-1-binding protein
833	psites	tmt	0	0.957948	1.05976	0.0893902	1.0152	0.219487	0.711866	0.972472	S	1138	___1	QFGIIGNDRVSGAGFSPSSKMEGGHFVPPGK	Q9C0C2	Q9C0C2	TNKS1BP1	182 kDa tankyrase-1-binding protein
834	psites	tmt	0	0.938346	1.06741	0.127982	1.0016	0.234405	0.652564	0.958951	S	521	___1	RLHGQLQRHQQQLLASPGSSTVDNKMLDDLY	Q9C0E2	Q9C0E2	XPO4	Exportin-4
835	psites	tmt	0	1.15402	0.978861	0.0975524	1.12962	0.140778	0.149233	0.834648	S	564	___1	KGQRKGMRFKHQRQLSLPLTQSKSSPKRGFF	Q9C0I1	Q9C0I1	MTMR12	Myotubularin-related protein 12
836	psites	tmt	0	0.980091	1.17105	0.140598	1.14774	0.0362714	0.894368	0.98915	S	75	___1	SPPQTSGLSPSRLSKSQGGEEEGPLSDKCSR	Q9H063	Q9H063	MAF1	Repressor of RNA polymerase III transcription MAF1 homolog
837	psites	tmt	0	0.755933	1.26314	0.223754	0.954852	0.102721	0.0880238	0.834648	S	252	___1	IFWSALAGAIPLNGDSEEEANRDDRQSNTTK	Q9H089	Q9H089	LSG1	Large subunit GTPase 1 homolog
838	psites	tmt	0	1.07037	1.0267	0.0614181	1.09895	0.115585	0.378377	0.879147	S	582	___1	GTPQEPPNPRMKRASSLNFLNKSVEEPTQPG	Q9H0B6	Q9H0B6	KLC2	Kinesin light chain 2
839	psites	tmt	0	0.885759	1.11106	0.119124	0.984133	0.101416	0.391144	0.887288	S	499	___1	GSPSPLGGIKRKAEDSDSEPEPEDNVRLWEA	Q9H0D6	Q9H0D6	XRN2	5'-3' exoribonuclease 2
840	psites	tmt	0	0.77669	1.19174	0.0462212	0.925608	0.13002	0.119915	0.834648	S	33	___1	QLHPVLQKPSVFGNDSDDDDETSVSESLQRE	Q9H0G5	Q9H0G5	NSRP1	Nuclear speckle splicing regulatory protein 1
841	psites	tmt	0	1.44498	0.794556	0.361504	1.14811	0.24019	0.196957	0.834648	S	26	___1	SNNHSGRLQLQVTVSSAKLKRKKNWFGTAIY	Q9H0M0	Q9H0M0	WWP1	NEDD4-like E3 ubiquitin-protein ligase WWP1
842	psites	tmt	0	1.12142	0.937729	0.0362311	1.05159	0.0958205	0.260702	0.855969	S	32	___1	RRRWKEPGSGGPQNLSGPGGRERDYIAPWER	Q9H0W8	Q9H0W8	SMG9	Protein SMG9
843	psites	tmt	0	0.994393	1.18161	0.06402	1.17498	0.170497	0.875582	0.986664	S	181	___1	EKKMPKPRLKATVTPSPVKGKGKVGRPTASK	Q9H1E3	Q9H1E3	NUCKS1	Nuclear ubiquitous casein and cyclin-dependent kinase substrate 1
844	psites	tmt	0	0.998032	0.967828	0.0590076	0.965924	0.039074	0.973752	1	S	19	___1	PVRNRKVVDYSQFQESDDADEDYGRDSGPPT	Q9H1E3	Q9H1E3	NUCKS1	Nuclear ubiquitous casein and cyclin-dependent kinase substrate 1
845	psites	tmt	0	0.874067	0.860282	0.155211	0.751943	0.142109	0.32141	0.858718	S	66	___1	GGGRGRGSLLLRRGFSDSGGGPPAKQRDLEG	Q9H307	Q9H307	PNN	Pinin
846	psites	tmt	0	1.03122	1.06185	0.0963459	1.095	0.436418	0.8811	0.986664	S	247	___1	LKKVEEEQEADEEDVSEEEAESKEGTNKDFP	Q9H3N1	Q9H3N1	TMX1	Thioredoxin-related transmembrane protein 1
847	psites	tmt	0	1.2204	0.847855	0.131921	1.03472	0.192867	0.146903	0.834648	S	363	___1	SSREASRPPEEPSAPSPTLPAQFKQRAPMYN	Q9H3P2	Q9H3P2	NELFA	Negative elongation factor A
848	psites	tmt	0	0.940639	0.976752	0.108097	0.918771	0.0784559	0.403959	0.89152	S	64	___1	DTSFLNSKAGEPDGESLDEQPSSSSSKRSLL	Q9H3Q1	Q9H3Q1	CDC42EP4	Cdc42 effector protein 4
849	psites	tmt	0	0.858705	1.05858	0.150556	0.909006	0.110625	0.174128	0.834648	S	292	___1	PSHALEDEGWAAAAPSPGSARSMGSHTTRDS	Q9H3Q1	Q9H3Q1	CDC42EP4	Cdc42 effector protein 4
850	psites	tmt	0	1.01209	0.974677	0.0985515	0.986465	0.0932717	0.884128	0.986664	S	118	___1	LGSLRDSALFVKNAMSLPQLNEKEAAEKGTS	Q9H3Q1	Q9H3Q1	CDC42EP4	Cdc42 effector protein 4
851	psites	tmt	0	1.08625	0.966563	0.20174	1.04993	0.172777	0.592682	0.941922	S	58	___1	EMNQGVSEERIHLGSSPKKGGNCDLSHQERL	Q9H410	Q9H410	DSN1	Kinetochore-associated protein DSN1 homolog
852	psites	tmt	0	1.00855	1.00872	0.0110555	1.01735	0.186539	0.998765	1	S	578	___1	GSEEKVKPPRPRAPESDTGDEDQDQERDTVF	Q9H4G0	Q9H4G0	EPB41L1	Band 4.1-like protein 1
853	psites	tmt	0	0.988311	1.14892	0.0569991	1.13549	0.257879	0.840497	0.986664	S	86	___1	ADGLSERTTPSKAQKSPQKIAKKYKSAICRV	Q9H4G0	Q9H4G0	EPB41L1	Band 4.1-like protein 1
854	psites	tmt	0	1.19907	0.97296	0.211626	1.16665	0.0927264	0.365902	0.874972	S	650	___1	DFSRSLPELDRDKSDSDTEGLLFSRDLNKGA	Q9H4G0	Q9H4G0	EPB41L1	Band 4.1-like protein 1
855	psites	tmt	0	0.545601	1.36572	0.847142	0.745139	0.165755	0.633716	0.950799	S	784	___1	MIPGPQTVATEIRSLSPIIGKDVLTSTYGAT	Q9H4G0	Q9H4G0	EPB41L1	Band 4.1-like protein 1
856	psites	tmt	0	0.946034	0.949322	0.0699581	0.898091	0.172014	0.515358	0.926679	S	169	___1	HRGRRRGLAHPKNHLSPQQGGATPQVPSPCC	Q9H4L4	Q9H4L4	SENP3	Sentrin-specific protease 3
857	psites	tmt	0	0.925498	1.01903	0.134993	0.943112	0.0884768	0.471404	0.90494	S	304	___1	LQVPKPFSGPVRLHSSNPNLSTLDFGEEKNY	Q9H4L5	Q9H4L5	OSBPL3	Oxysterol-binding protein-related protein 3
858	psites	tmt	0	1.20653	0.804586	0.228427	0.970753	0.0984771	0.185736	0.834648	S	575	___1	PRVSRASSPEGRHLPSPQLGTKAPVARPRMS	Q9H4M7	Q9H4M7	PLEKHA4	Pleckstrin homology domain-containing family A member 4
859	psites	tmt	0	1.18497	1.12047	0.403895	1.32773	0.18015	0.338672	0.869752	S	778	___1	QDEGAWPLRVTLLQSSF______________	Q9H4M7	Q9H4M7	PLEKHA4	Pleckstrin homology domain-containing family A member 4
860	psites	tmt	0	1.18654	0.90676	0.0451351	1.0759	0.0485371	0.0676644	0.834648	S	198	___1	EKQRTLDSGTSEIVKSPRIECSKTRREMQSV	Q9H501	Q9H501	ESF1	ESF1 homolog
861	psites	tmt	0	1.03914	0.993228	0.0430394	1.0321	0.0708124	0.419402	0.896798	S	47	___1	LVEFESNPEETREPGSPPSVQRAGLGSPERP	Q9H6F5	Q9H6F5	CCDC86	Coiled-coil domain-containing protein 86
862	psites	tmt	0	1.1711	0.909307	0.0983638	1.06489	0.0477226	0.0610829	0.834648	S	91	___1	AGLESPQGQPEPGAASPQRQQDLHLESPQRQ	Q9H6F5	Q9H6F5	CCDC86	Coiled-coil domain-containing protein 86
863	psites	tmt	0	0.882351	1.13263	0.111341	0.999379	0.217725	0.331329	0.866244	S	215	___1	TQPHRKVEGNFNPFASPQKNRQSDENNLKDP	Q9H6K1	Q9H6K1	C6orf106	Uncharacterized protein C6orf106
864	psites	tmt	0	0.99649	1.09154	0.109614	1.0877	0.0794911	0.980561	1	S	126	___1	EDGNYCPPVKRERTSSLTQFPPSQSEERSSG	Q9H6Z4	Q9H6Z4	RANBP3	Ran-binding protein 3
865	psites	tmt	0	1.23287	0.984166	0.125569	1.21335	0.197302	0.1636	0.834648	S	239	___1	RFDIYDPFHPTDEAYSPPPAPEQKYDPFEPT	Q9H7N4	Q9H7N4	SCAF1	Splicing factor, arginine/serine-rich 19
866	psites	tmt	0	1.07617	1.07776	0.0115303	1.15986	0.183835	0.669251	0.960786	S	226	___1	LSAGDMATCQPARSDSYSQSLKSPLNDMSDD	Q9H8W4	Q9H8W4	PLEKHF2	Pleckstrin homology domain-containing family F member 2
867	psites	tmt	0	0.97826	1.11572	0.265736	1.09147	0.133088	0.98835	1	S	451	___1	SEKPVSAAVDANASESP______________	Q9H8Y8	Q9H8Y8	GORASP2	Golgi reassembly-stacking protein 2
868	psites	tmt	0	1.12719	1.02051	0.055687	1.15031	0.0334627	0.12033	0.834648	S	97	___1	QHLNPPGGKTSDIFGSPVTATSRLAHPNKPK	Q9H910	Q9H910	HN1L	Hematological and neurological expressed 1-like protein
869	psites	tmt	0	0.974357	1.1132	0.0996375	1.08465	0.16373	0.74554	0.98231	S	607	___1	PDRRSVPAGLTLQSVSPQSLQGKTLSQDEGR	Q9HAU0	Q9HAU0	PLEKHA5	Pleckstrin homology domain-containing family A member 5
870	psites	tmt	0	0.745397	1.21332	0.052487	0.904403	0.262767	0.05165	0.834648	S	385	___1	CPVPPVSTVTGDENISDSEIEQYLRTPQEVR	Q9HAW0	Q9HAW0	BRF2	Transcription factor IIIB 50 kDa subunit
871	psites	tmt	0	1.12958	0.950316	0.327571	1.07346	0.0644254	0.366402	0.874972	S	146	___1	ESHSNDQSPQIRASPSPQPSSQPLQIHRQTP	Q9HC35	Q9HC35	EML4	Echinoderm microtubule-associated protein-like 4
872	psites	tmt	0	0.79142	1.2118	0.00420223	0.959043	0.124735	0.115019	0.834648	S	191	___1	RERERGTSRVDDKPSSPGDSSKKRGPKPRKE	Q9HC52	Q9HC52	CBX8	Chromobox protein homolog 8
873	psites	tmt	0	0.716648	1.12899	0.0544864	0.809092	0.00697151	0.0133906	0.73174	S	1034	___1	TTPLGGLGPGEARDYSPSRNPPEVEAR____	Q9HCM7	Q9HCM7	FBRSL1	Fibrosin-1-like protein
874	psites	tmt	0	0.834547	1.11918	0.338633	0.93401	0.0682292	0.55905	0.936012	S	821	___1	VFHAGTQQQKNFTPPSPFANKLQGPKASPTQ	Q9NPG3	Q9NPG3	UBN1	Ubinuclein-1
875	psites	tmt	0	0.980762	1.03757	0.0371186	1.01761	0.050111	0.549571	0.936012	S	359	___1	RKKSLEGMKKARVGGSDEEASGIPSRTASLE	Q9NQ55	Q9NQ55	PPAN	Suppressor of SWI4 1 homolog
876	psites	tmt	0	1.19177	1.00839	0.0756323	1.20177	0.11297	0.0446313	0.834648	S	125	___1	RVLADLKVQLYAKFGSNINLEADES______	Q9NQP4	Q9NQP4	PFDN4	Prefoldin subunit 4
877	psites	tmt	0	0.792769	1.17094	0.046769	0.92829	0.0805427	0.0713871	0.834648	S	94	___1	PGGWGAGASAPVEDDSDAETYGEENDEQGNY	Q9NQS1	Q9NQS1	AVEN	Cell death regulator Aven
878	psites	tmt	0	1.17126	0.961266	0.107281	1.12589	0.119846	0.109555	0.834648	S	1644	___1	SPGRERPDLEAPAPGSPFRVRRVRASELRSF	Q9NQT8	Q9NQT8	KIF13B	Kinesin-like protein KIF13B
879	psites	tmt	0	0.900216	1.03354	0.168175	0.930411	0.0356138	0.300587	0.858718	S	1410	___1	LIPSYSLGSNKGRWESQQDVSQTTVSRGIAP	Q9NQT8	Q9NQT8	KIF13B	Kinesin-like protein KIF13B
880	psites	tmt	0	0.967537	1.01172	0.0924085	0.978877	0.0487344	0.579865	0.936474	S	1797	___1	RLGAPEARRSATLSGSATNLASLTAALAKAD	Q9NQT8	Q9NQT8	KIF13B	Kinesin-like protein KIF13B
881	psites	tmt	0	1.01622	1.05544	0.252041	1.07256	0.0601241	0.773672	0.986664	S	89	___1	SKKAKKKEEPSQNDISPKTKSLRKKKEPIEK	Q9NR30	Q9NR30	DDX21	Nucleolar RNA helicase 2
882	psites	tmt	0	0.886792	1.00132	0.0449301	0.887965	0.0929342	0.237502	0.845239	S	71	___1	KQVKKKAEPSEVDMNSPKSKKAKKKEEPSQN	Q9NR30	Q9NR30	DDX21	Nucleolar RNA helicase 2
883	psites	tmt	0	1.02946	0.979772	0.0228593	1.00863	0.0326227	0.280252	0.855969	S	121	___1	VVSSKTKKVTKNEEPSEEEIDAPKPKKMKKE	Q9NR30	Q9NR30	DDX21	Nucleolar RNA helicase 2
884	psites	tmt	0	1.26363	0.896321	0.428586	1.13262	0.372034	0.61135	0.948	S	564	___1	GSLEPTTSLLGQRAPSPPLSQVFQTRAASAD	Q9NRA8	Q9NRA8	EIF4ENIF1	Eukaryotic translation initiation factor 4E transporter
885	psites	tmt	0	0.949255	1.23025	0.109106	1.16782	0.0486306	0.616523	0.948	S	276	___1	VLGQIPFLQNCEDEDSDEDDELDSVQHKKQR	Q9NRL3	Q9NRL3	STRN4	Striatin-4
886	psites	tmt	0	0.837617	1.01879	0.203349	0.853354	0.0580363	0.381363	0.879147	S	975	___1	ACSTTEEVFNSPRAGSPLCNSNLQDSEEDIE	Q9NRY4	Q9NRY4	ARHGAP35	Rho GTPase-activating protein 35
887	psites	tmt	0	1.05858	1.04036	0.00427376	1.1013	0.193797	0.763642	0.98551	S	1176	___1	RCTRLGRFASYRTSFSVGSDDELGPIRKKEE	Q9NRY4	Q9NRY4	ARHGAP35	Rho GTPase-activating protein 35
888	psites	tmt	0	0.791334	1.13482	0.0947259	0.898025	0.196892	0.0752575	0.834648	S	1179	___1	RLGRFASYRTSFSVGSDDELGPIRKKEEDQA	Q9NRY4	Q9NRY4	ARHGAP35	Rho GTPase-activating protein 35
889	psites	tmt	0	1.1666	1.09926	0.00805866	1.2824	0.0181797	0.00823247	0.723135	S	1475	___1	KRLKSQTKIIPELVGSPTQSTSSRTAYLGTH	Q9NSI6	Q9NSI6	BRWD1	Bromodomain and WD repeat-containing protein 1
890	psites	tmt	0	0.943344	1.11947	0.21789	1.05604	0.138838	0.721298	0.974845	S	590	___1	GTEPRPSSSNMKRAASLNYLNQPSAAPLQVS	Q9NSK0	Q9NSK0	KLC4	Kinesin light chain 4
891	psites	tmt	0	1.11323	0.949624	0.0645642	1.05715	0.0293556	0.164057	0.834648	S	611	___1	QPSAAPLQVSRGLSASTMDLSSSS_______	Q9NSK0	Q9NSK0	KLC4	Kinesin light chain 4
892	psites	tmt	0	1.36292	0.993113	0.249803	1.35354	0.0552142	0.0919962	0.834648	S	949	___1	STPFQPFLTSTSKSESNEDLFGLVPFDEITG	Q9NSY1	Q9NSY1	BMP2K	BMP-2-inducible protein kinase
893	psites	tmt	0	1.08221	0.890112	0.0722419	0.963292	0.234133	0.625566	0.948	S	1358	___1	SKQHRVSRRAQQRAESPESSAIESTQSTPQK	Q9NTI5	Q9NTI5	PDS5B	Sister chromatid cohesion protein PDS5 homolog B
894	psites	tmt	0	0.723836	1.2955	0.22057	0.937726	0.0466851	0.192187	0.834648	S	1257	___1	KPKGSQRSRKRGHTASESDEQQWPEEKRLKE	Q9NTI5	Q9NTI5	PDS5B	Sister chromatid cohesion protein PDS5 homolog B
895	psites	tmt	0	1.01434	1.03618	0.0824673	1.05104	0.0807514	0.816518	0.986664	S	1283	___1	KRLKEDILENEDEQNSPPKKGKRGRPPKPLG	Q9NTI5	Q9NTI5	PDS5B	Sister chromatid cohesion protein PDS5 homolog B
896	psites	tmt	0	0.831004	1.12511	0.333427	0.934971	0.0740911	0.364528	0.874972	S	1166	___1	RMETVSNASSSSNPSSPGRIKGRLDSSEMDH	Q9NTI5	Q9NTI5	PDS5B	Sister chromatid cohesion protein PDS5 homolog B
897	psites	tmt	0	0.991517	0.963581	0.0843101	0.955407	0.0894811	0.891283	0.987496	S	41	___1	ASSDAEPEPPSGRTESPATAAETASEELDNR	Q9NTJ3	Q9NTJ3	SMC4	Structural maintenance of chromosomes protein 4
898	psites	tmt	0	0.743233	1.22196	0.236341	0.908199	0.0769184	0.250228	0.855001	S	4538	___1	EERKNEKAEENTDQASPQEDYAGFERLQSGH	Q9NU22	Q9NU22	MDN1	Midasin
899	psites	tmt	0	0.91716	0.986665	0.0986294	0.90493	0.124348	0.516268	0.927429	S	195	___1	SRVTDKVLTANSNPSSPSAAKRRRT______	Q9NV56	Q9NV56	MRGBP	MRG/MORF4L-binding protein
900	psites	tmt	0	1.00085	1.00948	0.199367	1.01034	0.102673	0.916212	0.991742	S	470	___1	QETESLHGSSGKLTGSTSSLNKLSVQSSGNR	Q9NV70	Q9NV70	EXOC1	Exocyst complex component 1
901	psites	tmt	0	1.06779	0.949299	0.0137213	1.01365	0.186497	0.640152	0.953677	S	473	___1	ESLHGSSGKLTGSTSSLNKLSVQSSGNRRSQ	Q9NV70	Q9NV70	EXOC1	Exocyst complex component 1
902	psites	tmt	0	0.955185	0.984024	0.0881372	0.939925	0.0327862	0.575235	0.936012	S	19	___1	SPQKSPSVPKSPTPKSPPSRKKDDSFLGKLG	Q9NVD7	Q9NVD7	PARVA	Alpha-parvin
903	psites	tmt	0	1.23117	0.912474	0.0149169	1.12341	0.0983014	0.100012	0.834648	S	585	___1	AAPGKSQKRKYIEIDSDEEPRGELLSLRDIE	Q9NVU7	Q9NVU7	SDAD1	Protein SDA1 homolog
904	psites	tmt	0	1.16388	1.00957	0.14008	1.17502	0.139094	0.267402	0.855969	S	638	___1	AYSKTQPKTMFAQVESDDEEAKNEPEWKKRK	Q9NW82	Q9NW82	WDR70	WD repeat-containing protein 70
905	psites	tmt	0	1.08912	0.947219	0.0628574	1.03163	0.187606	0.463654	0.902495	S	77	___1	NTAVSRRERDRERASSPPDRIDIFGRTVSKR	Q9NWB6	Q9NWB6	ARGLU1	Arginine and glutamate-rich protein 1
906	psites	tmt	0	1.29979	0.840339	0.215361	1.09227	0.186039	0.109539	0.834648	S	766	___1	VPHQGRGFSQYGVSGSPTKSKVTSCPGCRKP	Q9NXC5	Q9NXC5	MIOS	WD repeat-containing protein mio
907	psites	tmt	0	1.0031	0.928406	0.133965	0.93128	0.14903	0.989118	1	S	63	___1	GGGPDVGTGAPRPGCSPRAPRADLDQPKFFT	Q9NXH8	Q9NXH8	TOR4A	Torsin-4A
908	psites	tmt	0	1.19386	0.892501	0.0738455	1.06552	0.200322	0.382958	0.879147	S	625	___1	KEGTCQRGDQCCYSHSPPTPRVSADAAPDCP	Q9NXH9	Q9NXH9	TRMT1	tRNA (guanine(26)-N(2))-dimethyltransferase
909	psites	tmt	0	0.881986	0.944305	0.135495	0.832864	0.118615	0.311063	0.858718	S	282	___1	LESKLASCRNLVYDQSPNRTGGPASGRSSKN	Q9NXR1	Q9NXR1	NDE1	Nuclear distribution protein nudE homolog 1
910	psites	tmt	0	1.03442	1.04677	0.164107	1.08279	0.320961	0.984702	1	S	203	___1	LRGQEHKYLLGDAPVSPSSQKLKRKAEEDPE	Q9NYB0	Q9NYB0	TERF2IP	Telomeric repeat-binding factor 2-interacting protein 1
911	psites	tmt	0	0.913772	1.02942	0.0712381	0.940651	0.22419	0.416493	0.896798	S	177	___1	QEKQTKKAEGEPQEESPLKSKSQEEPKDTFE	Q9NYF8	Q9NYF8	BCLAF1	Bcl-2-associated transcription factor 1
912	psites	tmt	0	1.21396	0.914642	0.0459991	1.11033	0.193407	0.184092	0.834648	S	385	___1	RAEGEWEDQEALDYFSDKESGKQKFNDSEGD	Q9NYF8	Q9NYF8	BCLAF1	Bcl-2-associated transcription factor 1
913	psites	tmt	0	1.12772	0.929145	0.0435426	1.04782	0.143954	0.184794	0.834648	S	512	___1	PEQVKSEKLKDLFDYSPPLHKNLDAREKSTF	Q9NYF8	Q9NYF8	BCLAF1	Bcl-2-associated transcription factor 1
914	psites	tmt	0	0.874118	1.03461	0.0771875	0.904371	0.241344	0.280915	0.855969	S	496	___1	EDKNSERITVKKETQSPEQVKSEKLKDLFDY	Q9NYF8	Q9NYF8	BCLAF1	Bcl-2-associated transcription factor 1
915	psites	tmt	0	1.0112	0.927949	0.0356655	0.938346	0.145095	0.971562	1	S	397	___1	DYFSDKESGKQKFNDSEGDDTEETEDYRQFR	Q9NYF8	Q9NYF8	BCLAF1	Bcl-2-associated transcription factor 1
916	psites	tmt	0	0.987307	0.917641	0.145233	0.905993	0.0936689	0.944286	0.996956	S	658	___1	STRQKSPEIHRRIDISPSTLRKHTRLAGEER	Q9NYF8	Q9NYF8	BCLAF1	Bcl-2-associated transcription factor 1
917	psites	tmt	0	0.993346	0.946869	0.0880203	0.940568	0.260076	0.842879	0.986664	S	531	___1	HKNLDAREKSTFREESPLRIKMIASDSHRPE	Q9NYF8	Q9NYF8	BCLAF1	Bcl-2-associated transcription factor 1
918	psites	tmt	0	1.16432	1.00116	0.0549297	1.16567	0.0431504	0.00433431	0.723135	S	637	___1	IKYQQITPVNQSRSSSPTQYGLTKNFSSLHL	Q9NYL2	Q9NYL2	ZAK	Mitogen-activated protein kinase kinase kinase MLT
919	psites	tmt	0	1.21302	0.969078	0.12412	1.17551	0.0987768	0.104106	0.834648	S	889	___1	QKKSAFTRTVSPGSVSPIHGQGQVVENLKAQ	Q9NZM3	Q9NZM3	ITSN2	Intersectin-2
920	psites	tmt	0	0.853409	0.971063	0.205209	0.828714	0.0903662	0.321019	0.858718	S	315	___1	LPHPLEGSRKVEEEGSPGDPDHEASTQGRTC	Q9NZT2	Q9NZT2	OGFR	Opioid growth factor receptor
921	psites	tmt	0	0.647927	1.1529	0.0146839	0.746993	0.152544	0.056088	0.834648	S	378	___1	GDEAGGHGEDRPEPLSPKESKKRKLELSRRE	Q9NZT2	Q9NZT2	OGFR	Opioid growth factor receptor
922	psites	tmt	0	0.980746	0.993302	0.0190279	0.974177	0.23254	0.741361	0.98231	S	114	___1	RPLFLAPDFDRWLDESDAEMELRAKEEERLN	Q9P035	Q9P035	HACD3	Very-long-chain (3R)-3-hydroxyacyl-CoA dehydratase 3
923	psites	tmt	0	1.19889	1.01568	0.636976	1.21769	0.466669	0.64078	0.953702	S	296	___1	EDFRTAWLNHRKLARSCHDLDLLGQSPGWGQ	Q9P0V3	Q9P0V3	SH3BP4	SH3 domain-binding protein 4
924	psites	tmt	0	0.733864	1.17923	0.0960445	0.865392	0.206345	0.0785254	0.834648	S	915	___1	SAMSKLRGAVAAEGASDTEREEPTESQGLAA	Q9P1Y6	Q9P1Y6	PHRF1	PHD and RING finger domain-containing protein 1
925	psites	tmt	0	0.973697	0.868794	0.250859	0.845942	0.0372188	0.95918	0.999014	S	867	___1	PGLLPSEITRTISINSPKAQTVQAVRCVTSY	Q9P1Y6	Q9P1Y6	PHRF1	PHD and RING finger domain-containing protein 1
926	psites	tmt	0	0.97118	1.09248	0.130152	1.061	0.0946229	0.796634	0.986664	S	973	___1	RTVTCVTVVEPEAPPSPDVLQAATHRVVELR	Q9P1Y6	Q9P1Y6	PHRF1	PHD and RING finger domain-containing protein 1
927	psites	tmt	0	0.907871	1.06234	0.271632	0.964467	0.209088	0.688307	0.9695	S	545	___1	GTPTLPPKGLAGPPASPGKAQPPKPERVTSL	Q9P206	Q9P206	KIAA1522	Uncharacterized protein KIAA1522
928	psites	tmt	0	1.11155	0.955755	0.297305	1.06237	0.0854895	0.461583	0.902495	S	1045	___1	SEGSYAGVGSPRDLQSPDFTTGFHSDKIEAK	Q9P2D0	Q9P2D0	IBTK	Inhibitor of Bruton tyrosine kinase
929	psites	tmt	0	0.929097	1.05161	0.12289	0.977044	0.0199213	0.316072	0.858718	S	2559	___1	AFEEDIETPPTRNIPSPGQLDPDTRIPVINL	Q9P2D1	Q9P2D1	CHD7	Chromodomain-helicase-DNA-binding protein 7
930	psites	tmt	0	0.906426	1.05747	0.0155959	0.95852	0.20302	0.396968	0.888673	S	583	___1	KKAEGSPSEGKKAEGSPNQGKKADAAANQGK	Q9P2E9	Q9P2E9	RRBP1	Ribosome-binding protein 1
931	psites	tmt	0	1.00907	1.01655	0.0195753	1.02577	0.102296	0.92214	0.991803	S	533	___1	QGKKTEGAQGKKAERSPNQGKKGEGAPIQGK	Q9P2E9	Q9P2E9	RRBP1	Ribosome-binding protein 1
932	psites	tmt	0	0.982698	1.08549	0.0801887	1.0667	0.000497131	0.806369	0.986664	S	135	___1	PVATVPAMPQEKLASSPKDKKKKEKKVAKVE	Q9P2E9	Q9P2E9	RRBP1	Ribosome-binding protein 1
933	psites	tmt	0	1.00999	1.03422	0.0851021	1.04454	0.140887	0.952468	0.997351	S	615	___1	TESASVQGRNTDVAQSPEAPKQEAPAKKKSG	Q9P2E9	Q9P2E9	RRBP1	Ribosome-binding protein 1
934	psites	tmt	0	0.748452	1.07268	0.119702	0.802848	0.0693975	0.0993436	0.834648	S	252	___1	NHVGTSKQPAQSQNLSPLSGFSRSRQTQDWV	Q9P2M7	Q9P2M7	CGN	Cingulin
935	psites	tmt	0	1.29135	0.99882	0.194545	1.28982	0.488032	0.439163	0.897566	S	131	___1	EEPGAYWNGKLLRSHSQASLAGPGPVDPSNR	Q9P2M7	Q9P2M7	CGN	Cingulin
936	psites	tmt	0	0.935825	0.982149	0.0984955	0.91912	0.174338	0.565029	0.936012	S	149	___1	SLAGPGPVDPSNRSNSMLELAPKVASPGSTI	Q9P2M7	Q9P2M7	CGN	Cingulin
937	psites	tmt	0	1.15176	1.05111	0.314788	1.21062	0.170672	0.486802	0.907808	S	159	___1	SNRSNSMLELAPKVASPGSTIDTAPLSSVDS	Q9P2M7	Q9P2M7	CGN	Cingulin
938	psites	tmt	0	1.38906	0.970167	0.232952	1.34762	0.15733	0.235276	0.845101	S	229	___1	RKKTVFPGAVPVLPASPPPKDSLRSTPSHGS	Q9UBC2	Q9UBC2	EPS15L1	Epidermal growth factor receptor substrate 15-like 1
939	psites	tmt	0	1.00413	1.04972	0.299651	1.05406	0.140735	0.856322	0.986664	S	102	___1	ESHLQSISNLNENQASEEEDELGELRELGYP	Q9UD71	Q9UD71	PPP1R1B	Protein phosphatase 1 regulatory subunit 1B
940	psites	tmt	0	0.974403	0.985723	0.0874346	0.960492	0.133885	0.71629	0.973092	S	207	___1	LNSSVKTGNESGSNLSDSGSVKRGEKDLRLG	Q9UDT6	Q9UDT6	CLIP2	CAP-Gly domain-containing linker protein 2
941	psites	tmt	0	0.554862	1.26138	0.113943	0.699894	0.204613	0.0105784	0.73174	S	923	___1	SLNELRVLLLEANRHSPGPERDLSREVHKAE	Q9UDT6	Q9UDT6	CLIP2	CAP-Gly domain-containing linker protein 2
942	psites	tmt	0	0.885143	1.0543	0.122361	0.933206	0.0924998	0.164196	0.834648	S	130	___1	VVKRPRKVQVAALQASPPLDQDDRAFEVMDE	Q9UDY2	Q9UDY2	TJP2	Tight junction protein ZO-2
943	psites	tmt	0	1.35145	0.716188	0.198616	0.967889	0.355269	0.442199	0.897566	S	251	___1	DDVPLSLSPSKRACASPSAQVEGSPVAGSDG	Q9UFC0	Q9UFC0	LRWD1	Leucine-rich repeat and WD repeat-containing protein 1
944	psites	tmt	0	0.939954	0.947273	0.0568143	0.890394	0.15621	0.626112	0.948	S	253	___1	VPLSLSPSKRACASPSAQVEGSPVAGSDGSQ	Q9UFC0	Q9UFC0	LRWD1	Leucine-rich repeat and WD repeat-containing protein 1
945	psites	tmt	0	1.0007	1.03747	0.115319	1.03819	0.23896	0.93095	0.993547	S	1322	___1	DIKSIPKRDSSKDLPSPDSRNCPAVTLTSPA	Q9UGU0	Q9UGU0	TCF20	Transcription factor 20
946	psites	tmt	0	0.815801	1.25122	0.133014	1.02074	0.0864554	0.0458818	0.834648	S	1335	___1	LPSPDSRNCPAVTLTSPAKTKILPPRKGRGL	Q9UGU0	Q9UGU0	TCF20	Transcription factor 20
947	psites	tmt	0	0.989073	1.02396	0.421235	1.01277	0.0861532	0.924338	0.991803	S	497	___1	SEGSMKVKASSVGVLSPQKKSPPTTMLLPAS	Q9UGU5	Q9UGU5	HMGXB4	HMG domain-containing protein 4
948	psites	tmt	0	0.986059	0.977342	0.034287	0.963717	0.247242	0.827332	0.986664	S	61	___1	VDDAGDCSGARYNDWSDDDDDSNESKSIVWY	Q9UH62	Q9UH62	ARMCX3	Armadillo repeat-containing X-linked protein 3
949	psites	tmt	0	1.13461	1.05585	0.074319	1.19798	0.103786	0.300968	0.858718	S	374	___1	KPLSPDSRASSLSESSPPKAMKKFQAPARET	Q9UHB6	Q9UHB6	LIMA1	LIM domain and actin-binding protein 1
950	psites	tmt	0	1.84637	0.558064	0.766577	1.03039	0.0693646	0.325942	0.862234	S	85	___1	NSEPSARHVDSLSQRSPKASLRRVELSGPKA	Q9UHD8	Q9UHD8	40057	Septin-9
951	psites	tmt	0	1.0493	0.913493	0.0851778	0.958526	0.162144	0.672847	0.962315	S	30	___1	RLRRLGDSSGPALKRSFEVEEVETPNSTPPR	Q9UHD8	Q9UHD8	40057	Septin-9
952	psites	tmt	0	0.948698	0.994119	0.0577145	0.943119	0.0697599	0.29517	0.858718	S	1468	___1	KRKKFPDRLAEDEGDSEPEAVGQSRGRRQKK	Q9UIG0	Q9UIG0	BAZ1B	Tyrosine-protein kinase BAZ1B
953	psites	tmt	0	1.25605	0.970681	0.0240204	1.21922	0.208457	0.283428	0.855969	S	399	___1	RLLPSVWSESEDGAGSPPPYRRRKRPSSARR	Q9UIS9	Q9UIS9	MBD1	Methyl-CpG-binding domain protein 1
954	psites	tmt	0	1.51389	0.8612	0.0735914	1.30377	0.2151	0.12982	0.834648	S	232	___1	AARREQRYQEQGGEASPQRTWEQQQEVVSRN	Q9UJU6	Q9UJU6	DBNL	Drebrin-like protein
955	psites	tmt	0	0.729116	1.02325	0.0271636	0.746068	0.125816	0.0726859	0.834648	S	352	___1	ASKPSSPREVKAEEKSPISINVKTVKKEPED	Q9UK58	Q9UK58	CCNL1	Cyclin-L1
956	psites	tmt	0	1.04168	1.02935	0.0442429	1.07226	0.0927454	0.471712	0.90494	S	1103	___1	IIIKASAKGGNLPPVSPNDSGAKIASNPLER	Q9UK61	Q9UK61	FAM208A	Protein FAM208A
957	psites	tmt	0	1.23771	0.848986	0.0993892	1.0508	0.0977011	0.0226511	0.812212	S	927	___1	EIHWKLIPITGGNARSPEDQLGKHGEKQTPG	Q9UK61	Q9UK61	FAM208A	Protein FAM208A
958	psites	tmt	0	0.869089	1.18178	0.250617	1.02708	0.335034	0.579806	0.936474	S	87	___1	GGREDLESSGLQRRNSSEASSGDFLDLKGEG	Q9UK76	Q9UK76	HN1	Hematological and neurological expressed 1 protein;Hematological and neurological expressed 1 protein, N-terminally processed
959	psites	tmt	0	1.10365	0.892027	0.347378	0.984486	0.0856596	0.573436	0.936012	S	707	___1	GSALGPRLGSQPIRASNPDLRRTEPILESPL	Q9UKE5	Q9UKE5	TNIK	TRAF2 and NCK-interacting protein kinase
960	psites	tmt	0	0.967898	1.04987	0.0677525	1.01617	0.0489914	0.475084	0.90494	S	680	___1	EEDIPPKVPQRTTSISPALARKNSPGNGSAL	Q9UKE5	Q9UKE5	TNIK	TRAF2 and NCK-interacting protein kinase
961	psites	tmt	0	0.865885	1.04222	0.104534	0.90244	0.0926763	0.0896458	0.834648	S	738	___1	APADSERGPKPEPPGSGSPAPPRRRRRAQDD	Q9UKJ3	Q9UKJ3	GPATCH8	G patch domain-containing protein 8
962	psites	tmt	0	0.865885	1.04222	0.104534	0.90244	0.0926763	0.0896458	0.834648	S	740	___1	ADSERGPKPEPPGSGSPAPPRRRRRAQDDSQ	Q9UKJ3	Q9UKJ3	GPATCH8	G patch domain-containing protein 8
963	psites	tmt	0	1.16062	1.13897	0.0777049	1.32192	0.406566	0.673878	0.962487	S	1107	___1	LLLEKIQSRKVERKPSVSEEVQATPNKAGPK	Q9UKJ3	Q9UKJ3	GPATCH8	G patch domain-containing protein 8
964	psites	tmt	0	0.733745	1.18464	0.30526	0.869225	0.165695	0.210472	0.834648	S	257	___1	VMDRHARKQKREREESEDELEEANGNNPIDI	Q9UKL0	Q9UKL0	RCOR1	REST corepressor 1
965	psites	tmt	0	0.800571	0.97918	0.0604333	0.783903	0.0664481	0.00285516	0.723135	S	135	___1	RDDFYDRLFDYRGRLSPVPVPRAVPVKRPRV	Q9UKM9	Q9UKM9	RALY	RNA-binding protein Raly
966	psites	tmt	0	1.72012	0.637348	0.146345	1.09631	0.289532	0.151553	0.834648	S	288	___1	ARTRDDGDEEGLLTHSEEELEHSQDTDADDG	Q9UKM9	Q9UKM9	RALY	RNA-binding protein Raly
967	psites	tmt	0	1.00729	1.00058	0.0679205	1.00787	0.163363	0.991181	1	S	611	___1	LWKPTHEDSKILLVDSPGMGNADDEQQEEGT	Q9UKN8	Q9UKN8	GTF3C4	General transcription factor 3C polypeptide 4
968	psites	tmt	0	0.989927	1.04542	0.0644969	1.03489	0.10826	0.843171	0.986664	S	12	___1	____MAGSEPRSGTNSPPPPFSDWGRLEAAI	Q9UKT5	Q9UKT5	FBXO4	F-box only protein 4
969	psites	tmt	0	1.00676	0.915086	0.128918	0.921276	0.159376	0.979112	1	S	410	___1	DRKKASLVALPEQTASEEETPPPLLTKEASS	Q9UKV3	Q9UKV3	ACIN1	Apoptotic chromatin condensation inducer in the nucleus
970	psites	tmt	0	0.859774	1.11516	0.0398889	0.958787	0.0628428	0.00715534	0.723135	S	838	___1	KISVVSATKGVPAGNSDTEGGQPGRKRRWGA	Q9UKV3	Q9UKV3	ACIN1	Apoptotic chromatin condensation inducer in the nucleus
971	psites	tmt	0	0.960312	0.987415	0.0999384	0.948226	0.102382	0.57533	0.936012	S	729	___1	SAEKHVTQRLQPERGSPKKCEAEEAEPPAAT	Q9UKV3	Q9UKV3	ACIN1	Apoptotic chromatin condensation inducer in the nucleus
972	psites	tmt	0	1.11309	0.928224	0.0731244	1.0332	0.133318	0.226573	0.835963	S	1004	___1	VSITIDDPVRTAQVPSPPRGKISNIVHISNL	Q9UKV3	Q9UKV3	ACIN1	Apoptotic chromatin condensation inducer in the nucleus
973	psites	tmt	0	1.40784	0.683245	0.0927364	0.9619	0.106502	0.0761781	0.834648	S	1104	___1	LHTFPQLQVEQSGEGSPEEGAVRLRPAGEPY	Q9ULL5	Q9ULL5	PRR12	Proline-rich protein 12
974	psites	tmt	0	1.00983	0.900069	0.131591	0.908919	0.0932311	0.899863	0.989979	S	216	___1	NKSREFANLIRNKFGSADNIAHLKNSLEEFR	Q9ULS5	Q9ULS5	TMCC3;TMCC2	Transmembrane and coiled-coil domains protein 3;Transmembrane and coiled-coil domains protein 2
975	psites	tmt	0	1.21769	0.918677	0.120825	1.11866	0.14047	0.151882	0.834648	S	490	___1	SPASTKTGQAGSLSGSPKPFSPQLSAPITTK	Q9ULU4	Q9ULU4	ZMYND8	Protein kinase C-binding protein 1
976	psites	tmt	0	0.861753	1.1161	0.0879992	0.961801	0.169181	0.373137	0.879147	S	186	___1	EEGSAHQDTAEKNASSPEKAKGRHTVPCMPP	Q9ULW0	Q9ULW0	TPX2	Targeting protein for Xklp2
977	psites	tmt	0	0.953282	0.989443	0.149008	0.943219	0.114627	0.664534	0.960733	S	283	___1	TADFRTKKKKRKQGGSPDEPDSKATRTDCSD	Q9ULX6	Q9ULX6	AKAP8L	A-kinase anchor protein 8-like
978	psites	tmt	0	1.28351	0.929382	0.0655386	1.19287	0.0372088	0.0425011	0.834648	S	473	___1	FQDFQDASKSGSLDDSFSDFQELPASSKTSN	Q9UMZ2	Q9UMZ2	SYNRG	Synergin gamma
979	psites	tmt	0	0.89853	1.15579	0.143674	1.03851	0.159912	0.551682	0.936012	S	332	___1	MASSCMTRLSRSRTASLTSAASVDGNRSRSR	Q9UN36	Q9UN36	NDRG2	Protein NDRG2
980	psites	tmt	0	0.878096	1.14118	0.0350217	1.00207	0.142626	0.196007	0.834648	S	19	___1	KEEKEGGARLGAGGGSPEKSPSAQELKEQGN	Q9UNE7	Q9UNE7	STUB1	E3 ubiquitin-protein ligase CHIP
981	psites	tmt	0	1.04298	1.03521	0.131465	1.0797	0.238896	0.854178	0.986664	S	4521	___1	QAESNKAFLAELEQNSPKIQKVKEALAGLLV	Q9UPN3	Q9UPN3	MACF1	Microtubule-actin cross-linking factor 1, isoforms 1/2/3/5
982	psites	tmt	0	0.969695	1.31793	0.163219	1.27799	0.106283	0.808928	0.986664	S	1021	___1	TTPMAPGVFLTQRRPSVGSQSNQAGQGKRPK	Q9UPP1	Q9UPP1	PHF8	Histone lysine demethylase PHF8
983	psites	tmt	0	1.216	0.964571	0.0368741	1.17292	0.104515	0.0119597	0.73174	S	1114	___1	PAEAPSPTASPSGDASPPATAPYDPRVLAAG	Q9UPT8	Q9UPT8	ZC3H4	Zinc finger CCCH domain-containing protein 4
984	psites	tmt	0	1.04205	0.999066	0.0891674	1.04107	0.073961	0.495375	0.910559	S	2047	___1	WNAYMLFYQRVSDQNSPVLPKKSRVSVVRQE	Q9UPU5	Q9UPU5	USP24	Ubiquitin carboxyl-terminal hydrolase 24
985	psites	tmt	0	0.982928	1.09612	0.0162257	1.07741	0.0524584	0.691095	0.9695	S	455	___1	SPKPAPAPGSHREISSSPTSKNRSHGRAKRD	Q9UQ35	Q9UQ35	SRRM2	Serine/arginine repetitive matrix protein 2
986	psites	tmt	0	1.06572	0.953431	0.0876968	1.01609	0.0317008	0.210175	0.834648	S	1124	___1	ASRSPIRQDRGEFSASPMLKSGMSPEQSRFQ	Q9UQ35	Q9UQ35	SRRM2	Serine/arginine repetitive matrix protein 2
987	psites	tmt	0	1.06633	0.908412	0.0751335	0.968669	0.0852221	0.313874	0.858718	S	1179	___1	SKEKMALPPQEDATASPPRQKDKFSPFPVQD	Q9UQ35	Q9UQ35	SRRM2	Serine/arginine repetitive matrix protein 2
988	psites	tmt	0	1.23023	0.858314	0.189398	1.05593	0.0972824	0.159571	0.834648	S	2449	___1	APSQSLLPPAQDQPRSPVPSAFSDQSRCLIA	Q9UQ35	Q9UQ35	SRRM2	Serine/arginine repetitive matrix protein 2
989	psites	tmt	0	0.956966	0.963119	0.0282241	0.921672	0.0635561	0.252307	0.855001	S	1083	___1	RSDTSSPEVRQSHSESPSLQSKSQTSPKGGR	Q9UQ35	Q9UQ35	SRRM2	Serine/arginine repetitive matrix protein 2
990	psites	tmt	0	0.970782	0.992347	0.0557857	0.963353	0.120063	0.637928	0.952382	S	2581	___1	SSLPVQPEVALKRVPSPTPAPKEAVREGRPP	Q9UQ35	Q9UQ35	SRRM2	Serine/arginine repetitive matrix protein 2
991	psites	tmt	0	0.985544	0.988825	0.0413732	0.974531	0.339575	0.803246	0.986664	S	876	___1	NEQSVTPQRRSCFESSPDPELKSRTPSRHSC	Q9UQ35	Q9UQ35	SRRM2	Serine/arginine repetitive matrix protein 2
992	psites	tmt	0	0.993793	0.966932	0.0556934	0.96093	0.214772	0.880249	0.986664	S	783	___1	KAKSRLSLRRSLSGSSPCPKQKSQTPPRRSR	Q9UQ35	Q9UQ35	SRRM2	Serine/arginine repetitive matrix protein 2
993	psites	tmt	0	0.911292	1.05265	0.125518	0.959274	0.167935	0.389064	0.884083	S	2272	___1	ADSRTPAAAAAMNLASPRTAVAPSAVNLADP	Q9UQ35	Q9UQ35	SRRM2	Serine/arginine repetitive matrix protein 2
994	psites	tmt	0	0.573255	1.31911	0.719932	0.756189	0.269369	0.378579	0.879147	S	1067	___1	KATLVMKKGDVEGSQSQDEGEGSGESERGSG	Q9UQE7	Q9UQE7	SMC3	Structural maintenance of chromosomes protein 3
995	psites	tmt	0	1.0422	0.981665	0.0688938	1.02309	0.159149	0.763073	0.98551	S	306	___1	KGGLLTSEEDSGFSTSPKDNSLPKKKRQKTE	Q9UQR1	Q9UQR1	ZNF148	Zinc finger protein 148
996	psites	tmt	0	1.04768	1.03012	0.0906451	1.07924	0.0628997	0.489221	0.90942	S	182	___1	MYKLRTNLQPLESTQSQDF____________	Q9Y248	Q9Y248	GINS2	DNA replication complex GINS protein PSF2
997	psites	tmt	0	2.55808	0.574334	0.472969	1.46919	0.239008	0.126292	0.834648	S	973	___1	KRLLAAKRAASVRQNSATESADSIEIYVPEA	Q9Y2H0	Q9Y2H0	DLGAP4	Disks large-associated protein 4
998	psites	tmt	0	1.06663	0.923821	0.0100762	0.985373	0.0645387	0.166576	0.834648	S	842	___1	RMRRHQSGSMREKRRSLQLPASPAPDPSPRP	Q9Y2H5	Q9Y2H5	PLEKHA6	Pleckstrin homology domain-containing family A member 6
999	psites	tmt	0	0.982074	1.02839	0.203395	1.00996	0.159234	0.946136	0.996956	S	555	___1	VKPTSVSGRHSKARDSDEENDPDDEDAVVNA	Q9Y2I9	Q9Y2I9	TBC1D30	TBC1 domain family member 30
1000	psites	tmt	0	0.808163	1.36612	0.521994	1.10405	0.0874523	0.752575	0.983706	S	50	___1	QQQALRGGAGTGGTGSPQASLEILAPEDSQV	Q9Y2J4	Q9Y2J4	AMOTL2	Angiomotin-like protein 2
1001	psites	tmt	0	1.06552	0.929619	0.117535	0.990528	0.119803	0.479018	0.90494	S	144	___1	PAAGSKVLLGFSSDESDVEASPRDQAGGGGR	Q9Y2U8	Q9Y2U8	LEMD3	Inner nuclear membrane protein Man1
1002	psites	tmt	0	0.888303	1.1853	0.0624536	1.05291	0.0809205	0.114103	0.834648	S	52	___1	NVVPSPLPTRRTRTFSATVRASQGPVYKGVC	Q9Y2V2	Q9Y2V2	CARHSP1	Calcium-regulated heat stable protein 1
1003	psites	tmt	0	0.978798	0.974172	0.0916041	0.953518	0.0480123	0.718456	0.973272	S	243	___1	YGTGSASRASAVSELSPRERSPALKSPLQSV	Q9Y2W1	Q9Y2W1	THRAP3	Thyroid hormone receptor-associated protein 3
1004	psites	tmt	0	1.38898	0.834326	0.161067	1.15886	0.114173	0.0142991	0.736225	S	248	___1	ASRASAVSELSPRERSPALKSPLQSVVVRRR	Q9Y2W1	Q9Y2W1	THRAP3	Thyroid hormone receptor-associated protein 3
1005	psites	tmt	0	1.0971	0.857487	0.12677	0.940751	0.0534445	0.428689	0.897566	S	379	___1	QTNTDKEKIKEKGSFSDTGLGDGKMKSDSFA	Q9Y2W1	Q9Y2W1	THRAP3	Thyroid hormone receptor-associated protein 3
1006	psites	tmt	0	1.19677	0.92322	0.126711	1.10488	0.113782	0.086032	0.834648	S	682	___1	AKNKKSPEIHRRIDISPSTFRKHGLAHDEMK	Q9Y2W1	Q9Y2W1	THRAP3	Thyroid hormone receptor-associated protein 3
1007	psites	tmt	0	1.0108	0.989589	0.0390489	1.00027	0.0885646	0.867136	0.986664	S	284	___1	AESREERMGGAGGEGSDDDTSLT________	Q9Y365	Q9Y365	STARD10	PCTP-like protein
1008	psites	tmt	0	1.18828	0.806613	0.121393	0.95848	0.0741312	0.224934	0.835963	S	266	___1	SPRQRRAQQQSQRRLSTSPDVIQGHQPRDNH	Q9Y385	Q9Y385	UBE2J1	Ubiquitin-conjugating enzyme E2 J1
1009	psites	tmt	0	1.77077	0.701548	0.122843	1.24228	0.437367	0.115246	0.834648	S	200	___1	TDALPEPEPPGAMAASEDEEEEEEALEAMQS	Q9Y3E7	Q9Y3E7	CHMP3	Charged multivesicular body protein 3
1010	psites	tmt	0	0.998693	1.00948	0.200632	1.00816	0.120727	0.950872	0.997347	S	411	___1	HIPKDHKPGTFPKALSIESLSPTDSSNGVNW	Q9Y3M8	Q9Y3M8	STARD13	StAR-related lipid transfer protein 13
1011	psites	tmt	0	1.00817	0.976476	0.134514	0.984449	0.438397	0.85756	0.986664	S	133	___1	SMKLDVNFQRKKGDDSDEEDLCISNKWTFQR	Q9Y3M8	Q9Y3M8	STARD13	StAR-related lipid transfer protein 13
1012	psites	tmt	0	0.919042	1.32134	0.451159	1.21437	0.292697	0.905366	0.989979	S	521	___1	VELNSPRTTHLAGALSPGEAWPFESV_____	Q9Y3X0	Q9Y3X0	CCDC9	Coiled-coil domain-containing protein 9
1013	psites	tmt	0	1.00104	1.03257	0.0425326	1.03364	0.102651	0.968434	1	S	238	___1	SSRAGGLDWPEATEVSPSRTIRAPAVRTLQR	Q9Y446	Q9Y446	PKP3	Plakophilin-3
1014	psites	tmt	0	1.40824	0.800654	0.194794	1.12752	0.164616	0.0314319	0.834648	S	313	___1	HGFNSYGSHRTLQRLSSGFDDIDLPSAVKYL	Q9Y446	Q9Y446	PKP3	Plakophilin-3
1015	psites	tmt	0	1.35665	0.760588	0.084016	1.03185	0.110693	0.0185323	0.812212	S	314	___1	GFNSYGSHRTLQRLSSGFDDIDLPSAVKYLM	Q9Y446	Q9Y446	PKP3	Plakophilin-3
1016	psites	tmt	0	0.989431	1.02211	0.244107	1.0113	0.221734	0.998003	1	S	331	___1	FDDIDLPSAVKYLMASDPNLQVLGAAYIQHK	Q9Y446	Q9Y446	PKP3	Plakophilin-3
1017	psites	tmt	0	0.870577	0.998863	0.0155897	0.869587	0.141785	0.145075	0.834648	S	182	___1	MVDSQKCSDVSELSSSPPGPYHQEPYVCKPE	Q9Y478	Q9Y478	PRKAB1	5'-AMP-activated protein kinase subunit beta-1
1018	psites	tmt	0	1.13552	0.82282	0.00938344	0.934329	0.103057	0.102338	0.834648	S	108	___1	LSGSFNNWSKLPLTRSHNNFVAILDLPEGEH	Q9Y478	Q9Y478	PRKAB1	5'-AMP-activated protein kinase subunit beta-1
1019	psites	tmt	0	0.918793	0.924564	0.235444	0.849484	0.0637118	0.635116	0.950873	S	539	___1	NLKPSSETKTQKGLFSDEEDSEDLFSSQSAS	Q9Y4E1	Q9Y4E1	FAM21C	WASH complex subunit FAM21C
1020	psites	tmt	0	1.06827	1.06772	0.178085	1.14061	0.124242	0.693784	0.9695	S	829	___1	AAPGDGEGLGQTAQPSPPARDGVYVSANGRM	Q9Y4F5	Q9Y4F5	CEP170B	Centrosomal protein of 170 kDa protein B
1021	psites	tmt	0	0.994063	1.02126	0.0510726	1.0152	0.0149048	0.899847	0.989979	S	915	___1	SLPSMHEYPLPPEPKSPGEYINIDFGEPGAR	Q9Y4H2	Q9Y4H2	IRS2	Insulin receptor substrate 2
1022	psites	tmt	0	1.08181	1.0421	0.130582	1.12735	0.0788517	0.39423	0.888152	S	577	___1	DAAQDLDRGLRKRTYSLTTPARQRPVPQPSS	Q9Y4H2	Q9Y4H2	IRS2	Insulin receptor substrate 2
1023	psites	tmt	0	0.973952	1.12719	0.219976	1.09783	0.164103	0.886494	0.986664	S	329	___1	KAKEMEQPEKKVMPNSPQNGVLVKETAIETK	Q9Y4K1	Q9Y4K1	AIM1	Absent in melanoma 1 protein
1024	psites	tmt	0	0.91286	1.35595	0.131439	1.2378	0.406934	0.510496	0.923442	S	836	___1	LLLLQRLKNRLLPPASP______________	Q9Y4R8	Q9Y4R8	TELO2	Telomere length regulation protein TEL2 homolog
1025	psites	tmt	0	0.661221	1.10593	0.0693118	0.731267	0.483358	0.217523	0.835963	S	227	___1	WAVLAGREVELPTEPSLVYEAVCNRQNRPSL	Q9Y572	Q9Y572	RIPK3	Receptor-interacting serine/threonine-protein kinase 3
1026	psites	tmt	0	1.16653	0.970489	0.295253	1.1321	0.0626121	0.503017	0.913915	S	295	___1	KSQRQKIAEEIGIEGSDDDALVTGEQDEELS	Q9Y5B6	Q9Y5B6	PAXBP1	PAX3- and PAX7-binding protein 1
1027	psites	tmt	0	0.917029	1.02014	0.12467	0.935499	0.136464	0.454317	0.902495	S	536	___1	NIGITNVDVKAIPADSPTDQEPKTVMLSKQS	Q9Y5Y0	Q9Y5Y0	FLVCR1	Feline leukemia virus subgroup C receptor-related protein 1
1028	psites	tmt	0	1.18301	1.01823	0.0280755	1.20457	0.0457357	0.0056404	0.723135	S	956	___1	RPSLLTPTGDPRANASPQKPLDLKQLKQRAA	Q9Y618	Q9Y618	NCOR2	Nuclear receptor corepressor 2
1029	psites	tmt	0	0.905586	1.11068	0.133654	1.00581	0.0721412	0.246568	0.855001	S	2269	___1	YRDGEQTEPSRMGSKSPGNTSQPPAFFSKLT	Q9Y618	Q9Y618	NCOR2	Nuclear receptor corepressor 2
1030	psites	tmt	0	1.14383	1.03632	0.0521839	1.18537	0.423645	0.681514	0.967752	S	62	___1	RENSPFLNNVEVEQESFFEGKNMALFEEEMD	Q9Y666	Q9Y666	SLC12A7	Solute carrier family 12 member 7
1031	psites	tmt	0	0.996117	1.03503	0.105732	1.03101	0.132481	0.944825	0.996956	S	207	___1	RDFQEYVEPGEDFPASPQRRNTASQEDKDDS	Q9Y6G9	Q9Y6G9	DYNC1LI1	Cytoplasmic dynein 1 light intermediate chain 1
1032	psites	tmt	0	0.881696	1.006	0.12049	0.88699	0.132709	0.285122	0.855969	S	105	___1	NGDLEKRSEPQPEEGSPAGGQKGGAPAEGEG	Q9Y6K1	Q9Y6K1	DNMT3A	DNA (cytosine-5)-methyltransferase 3A
1033	psites	tmt	0	1.01407	0.965421	0.0374482	0.979006	0.0702009	0.837767	0.986664	S	162	___1	NYSFKISYIPDEEVSSPSPPQRAQRGDHSSR	Q9Y6M1	Q9Y6M1	IGF2BP2	Insulin-like growth factor 2 mRNA-binding protein 2
1034	psites	tmt	0	1.21173	0.886577	0.146945	1.07429	0.0822713	0.109173	0.834648	S	164	___1	SFKISYIPDEEVSSPSPPQRAQRGDHSSREQ	Q9Y6M1	Q9Y6M1	IGF2BP2	Insulin-like growth factor 2 mRNA-binding protein 2
1035	psites	tmt	0	0.812902	1.15589	0.167455	0.939622	0.0985543	0.156177	0.834648	S	201	___1	DQFVSESGGVRGSLGSPGNRENKEKKVFISL	Q9Y6N9	Q9Y6N9	USH1C	Harmonin
1036	psites	tmt	0	1.4088	0.800973	0.484842	1.12841	0.343837	0.233875	0.845101	S	246	___1	LLDGNLLDGQAEVFGSDDDHIQFVQKKPPRE	Q9Y6Y0	Q9Y6Y0	IVNS1ABP	Influenza virus NS1A-binding protein
1037	psites	tmt	0	1.02714	0.994387	0.100161	1.02138	0.113887	0.831103	0.986664	T	594	___1	SSRLSSSVSAMRVLNTGSDVEEAVADALKKP	O75122	O75122	CLASP2	CLIP-associating protein 2
1038	psites	tmt	0	0.894	1.1086	0.174215	0.991086	0.0886479	0.331118	0.866244	T	693	___1	TLRRLLQERELVEPLTPSGEAPNQALLRILK	P00533	P00533	EGFR	Epidermal growth factor receptor
1039	psites	tmt	0	1.3876	0.762117	0.520868	1.05751	0.451201	0.565682	0.936012	T	725	___1	TEFKKIKVLGSGAFGTVYKGLWIPEGEKVKI;TELRKVKVLGSGAFGTVYKGIWIPDGENVKI	P00533;P04626	P00533	EGFR;ERBB4;ERBB2	Epidermal growth factor receptor;Receptor tyrosine-protein kinase erbB-4;ERBB4 intracellular domain;Receptor tyrosine-protein kinase erbB-2
1040	psites	tmt	0	1.58545	0.779556	0.0215055	1.23595	0.524043	0.424857	0.896798	T	14	___1	__MEDYTKIEKIGEGTYGVVYKGRHKTTGQV	P06493	P06493	CDK1;CDK2;CDK3	Cyclin-dependent kinase 1;Cyclin-dependent kinase 2;Cyclin-dependent kinase 3
1041	psites	tmt	0	1.03675	1.05831	0.0940312	1.09721	0.101798	0.628384	0.94819	T	146	___1	PAGAAKKPKKATGAATPKKSAKKTPKKAKKP	P10412	P10412	HIST1H1E	Histone H1.4
1042	psites	tmt	0	1.2656	0.835023	0.0939612	1.05681	0.0719305	0.0242583	0.812212	T	60	___1	AIPAKKAPAGQEEPGTPPSSPLSAEQLDRIQ	P13051	P13051	UNG	Uracil-DNA glycosylase
1043	psites	tmt	0	1.08033	1.0578	0.187265	1.14277	0.343299	0.861195	0.986664	T	57	___1	KAGIIASARAGETRFTDTRKDEQERCITIKS	P13639	P13639	EEF2	Elongation factor 2
1044	psites	tmt	0	1.05529	1.00367	0.131702	1.05916	0.0894404	0.580826	0.936688	T	270	___1	TIAATPIQTLPQSQSTPKRIDTPSLEEPSDL	P14859	P14859	POU2F1	POU domain, class 2, transcription factor 1
1045	psites	tmt	0	1.00878	1.1075	0.0259411	1.11722	0.0986004	0.923509	0.991803	T	146	___1	PVGAAKKPKKAAGGATPKKSAKKTPKKAKKP	P16403	P16403	HIST1H1C	Histone H1.2
1046	psites	tmt	0	0.981369	1.1705	0.0656874	1.14869	0.046369	0.677601	0.967151	T	69	___1	KKAAATSAKKVVVSPTKKVAVATPAKKAAVT	P19338	P19338	NCL	Nucleolin
1047	psites	tmt	0	1.09541	0.983894	0.146832	1.07777	0.179672	0.462185	0.902495	T	111	___1	EGVKDLKIESDVQEPTEPEDDLDIMLGNKKK	P20042	P20042	EIF2S2	Eukaryotic translation initiation factor 2 subunit 2
1048	psites	tmt	0	1.24756	1.01115	0.197159	1.26147	0.194487	0.155024	0.834648	T	575	___1	AAGVVVEEELFHQQGTPRASNRSCAIM____	P20700	P20700	LMNB1	Lamin-B1
1049	psites	tmt	0	1.04463	0.875111	0.0697555	0.914167	0.129682	0.655185	0.958951	T	221	___1	DHVSIVEPKDEILPTTPISEQKGGKPEPPAM	P23396	P23396	RPS3	40S ribosomal protein S3
1050	psites	tmt	0	0.638492	1.1712	0.069714	0.747804	0.263778	0.1399	0.834648	T	942	___1	TSAPDLKNVRSKVGSTENIKHQPGGGRAKVE	P27816	P27816	MAP4	Microtubule-associated protein 4
1051	psites	tmt	0	1.00718	1.03137	0.0675952	1.03877	0.101027	0.932231	0.993909	T	122	___1	RKAKKRAFQLEEGEETEPDCKYSKKHWKSRE	P38432	P38432	COIL	Coilin
1052	psites	tmt	0	1.05633	0.83722	0.0662761	0.884379	0.0523128	0.320675	0.858718	T	160	___1	KLLKLREQGTESRSSTPLPTISSSAENTRQN	P42166;P42167	P42167	TMPO	Lamina-associated polypeptide 2, isoform alpha;Thymopoietin;Thymopentin;Lamina-associated polypeptide 2, isoforms beta/gamma;Thymopoietin;Thymopentin
1053	psites	tmt	0	0.805225	1.08459	0.0740833	0.873342	0.0500959	0.0136198	0.73174	T	74	___1	SKGPPDFSSDEEREPTPVLGSGAAAAGRSRA	P42166;P42167	P42167	TMPO	Lamina-associated polypeptide 2, isoform alpha;Thymopoietin;Thymopentin;Lamina-associated polypeptide 2, isoforms beta/gamma;Thymopoietin;Thymopentin
1054	psites	tmt	0	1.07171	0.959309	0.117252	1.0281	0.178923	0.572161	0.936012	T	260	___1	TSSQNDVDMSWIPQETLNQINKASPRRLPRK	P43307	P43307	SSR1	Translocon-associated protein subunit alpha
1055	psites	tmt	0	0.798112	1.12616	0.192849	0.898802	0.151574	0.129178	0.834648	T	782	___1	EPFDRHAPAMLRERGTPPVDPKLAWVGDVFT	P48634	P48634	PRRC2A	Protein PRRC2A
1056	psites	tmt	0	0.889766	1.08488	0.136793	0.965287	0.249637	0.396565	0.888673	T	321	___1	AQQAASSSGQGQQAQTPTGKQTDKTKSNMKG	P48729	P48729	CSNK1A1	Casein kinase I isoform alpha
1057	psites	tmt	0	1.10724	0.980361	0.128481	1.0855	0.0768636	0.204567	0.834648	T	267	___1	LEENKRSLAALDALNTDDENDEEEYEAWKVR	P55081	P55081	MFAP1	Microfibrillar-associated protein 1
1058	psites	tmt	0	1.10741	0.905659	0.15013	1.00293	0.104503	0.304924	0.858718	T	508	___1	QITMIPPSAQPPRTQTPPLGQTPQLGLKTNP	P78344	P78344	EIF4G2	Eukaryotic translation initiation factor 4 gamma 2
1059	psites	tmt	0	0.973185	1.05685	0.0747799	1.02851	0.14429	0.709285	0.972075	T	2328	___1	VSASTQSTPASSRAQTLPTSVVTITSESSPG	Q01082	Q01082	SPTBN1	Spectrin beta chain, non-erythrocytic 1
1060	psites	tmt	0	1.04158	0.917613	0.0196069	0.955769	0.0320467	0.266239	0.855969	T	225	___1	PVTPTRDVATSPISPTENNTTPPDALTRNTE	Q13153	Q13153	PAK1	Serine/threonine-protein kinase PAK 1
1061	psites	tmt	0	0.927261	1.06798	0.209582	0.990293	0.277481	0.630535	0.948723	T	871	___1	FGLARLYSSEESRPYTNKVITLWYRPPELLL	Q14004	Q14004	CDK13	Cyclin-dependent kinase 13
1062	psites	tmt	0	1.25524	0.910669	0.442943	1.14311	0.165285	0.40457	0.89152	T	104	___1	EFEKNKGKGFSVVADTPELQRIKKTQDQISN	Q14847	Q14847	LASP1	LIM and SH3 domain protein 1
1063	psites	tmt	0	1.19954	0.937562	0.268979	1.12464	0.205081	0.514628	0.926206	T	610	___1	AETPQAKKIKLQTPNTFPKRKKGEKRASSPF	Q14978	Q14978	NOLC1	Nucleolar and coiled-body phosphoprotein 1
1064	psites	tmt	0	1.36159	0.83607	0.336575	1.13839	0.671141	0.555105	0.936012	T	450	___1	FGQAATMEGIGAIGGTPPAFNRAAPGAEFAP	Q15233	Q15233	NONO	Non-POU domain-containing octamer-binding protein
1065	psites	tmt	0	1.13088	0.948335	0.162924	1.07246	0.193133	0.572153	0.936012	T	426	___1	WEAQQRILEQQNSSRTLEKNKKKGKIF____	Q16181	Q16181	39326	Septin-7
1066	psites	tmt	0	0.828838	1.18807	0.00493301	0.984719	0.074577	0.07011	0.834648	T	509	___1	VPRGLYDGPVCEVSVTPKTVTPASSAKTSPA	Q16555	Q16555	DPYSL2	Dihydropyrimidinase-related protein 2
1067	psites	tmt	0	1.09361	0.878145	0.158551	0.960344	0.134807	0.59973	0.941922	T	606	___1	PAIQAPVRQQPKVQTTPPPAVQGQKVGSLTP	Q2M2I8	Q2M2I8	AAK1	AP2-associated protein kinase 1
1068	psites	tmt	0	0.844401	0.99706	0.0606393	0.841918	0.14335	0.0752315	0.834648	T	93	___1	SDSGSDALRSGLTVPTSPKGRLLDRRSRSGK	Q53EL6	Q53EL6	PDCD4	Programmed cell death protein 4
1069	psites	tmt	0	0.86328	1.11897	0.14381	0.965985	0.0756693	0.212907	0.834648	T	285	___1	ARKRNLALDEAGQRSTM______________	Q53TN4	Q53TN4	CYBRD1	Cytochrome b reductase 1
1070	psites	tmt	0	1.43565	1.02377	0.0730314	1.46978	0.208192	0.154269	0.834648	T	331	___1	EAKPRKTLKEKKERRTPSDDEEDNLFAPPKL	Q641Q2;Q9Y4E1	Q641Q2	FAM21A;FAM21C	WASH complex subunit FAM21A;WASH complex subunit FAM21C
1071	psites	tmt	0	1.05663	1.02407	0.0295303	1.08207	0.0498743	0.313877	0.858718	T	97	___1	EPKKPGNKKQPKKVATPPNQNQKQGRFRSLE	Q6NUQ4	Q6NUQ4	TMEM214	Transmembrane protein 214
1072	psites	tmt	0	1.07241	0.946347	0.0641502	1.01487	0.15276	0.458821	0.902495	T	925	___1	RSKKGGEFDEFVNDDTDDDLPISKKKKRRKG	Q6PD62	Q6PD62	CTR9	RNA polymerase-associated protein CTR9 homolog
1073	psites	tmt	0	0.612565	1.12578	0.217465	0.689614	0.203643	0.147943	0.834648	T	291	___1	VKEVALGRSLDNKGDTDGEDQVCVSEISIVT	Q6ULP2	Q6ULP2	AFTPH	Aftiphilin
1074	psites	tmt	0	1.15317	1.10946	0.00266717	1.2794	0.188939	0.425246	0.896798	T	1382	___1	PNTGSIFLAKKLDFETQSLYKLNITAKDQGR	Q6V0I7	Q6V0I7	FAT4	Protocadherin Fat 4
1075	psites	tmt	0	0.884241	1.14287	0.0786641	1.01058	0.127154	0.211558	0.834648	T	796	___1	SAKPPAGGKSSQQPSTPQQAPPGQPQQGTFV	Q86VM9	Q86VM9	ZC3H18	Zinc finger CCCH domain-containing protein 18
1076	psites	tmt	0	0.966448	1.03011	0.0140633	0.995546	0.0547493	0.344397	0.874972	T	220	___1	TKSRSPSPAPEKKEKTPELPEPSVKVKEPSV	Q8IYB3	Q8IYB3	SRRM1	Serine/arginine repetitive matrix protein 1
1077	psites	tmt	0	0.964463	1.05591	0.26199	1.01839	0.190512	0.915073	0.991742	T	432	___1	ASVARKAVVLPGGTATSPKMIAKNVLGLVPQ	Q8N1G0	Q8N1G0	ZNF687	Zinc finger protein 687
1078	psites	tmt	0	0.869046	1.16551	0.250377	1.01289	0.128015	0.422621	0.896798	T	511	___1	SGYIPSNILEPLQPGTPGTQGQSPSRVPMLR	Q8TE67	Q8TE67	EPS8L3	Epidermal growth factor receptor kinase substrate 8-like protein 3
1079	psites	tmt	0	0.948089	1.31392	0.28293	1.24571	0.535373	0.694464	0.9695	T	663	___1	VIQHTGAAAEEFNDDTD______________	Q8WU17	Q8WU17	RNF139	E3 ubiquitin-protein ligase RNF139
1080	psites	tmt	0	0.978144	1.1707	0.0767099	1.14511	0.426138	0.699381	0.970383	T	1048	___1	RSQDQFSDMRISINQTPGKSLDFGFTIKWDI	Q8WWI1	Q8WWI1	LMO7	LIM domain only protein 7
1081	psites	tmt	0	1.00957	1.31243	0.111652	1.32498	0.11715	0.919958	0.991803	T	246	___1	EDTQVFGDLPRPRLNTSDFQKLKRKY_____	Q96B36	Q96B36	AKT1S1	Proline-rich AKT1 substrate 1
1082	psites	tmt	0	1.17471	0.901783	0.30302	1.05933	0.227922	0.430318	0.897566	T	118	___1	TLRWEETRTPESQPDTPPGTPLVSQDEKRDA	Q96T60	Q96T60	PNKP	Bifunctional polynucleotide phosphatase/kinase;Polynucleotide 3'-phosphatase;Polynucleotide 5'-hydroxyl-kinase
1083	psites	tmt	0	0.975134	1.00505	0.0554982	0.980061	0.0259744	0.459654	0.902495	T	302	___1	NQPSFPPNSSGRGGGTPDANSLAPPGKAGGG	Q9BRQ0	Q9BRQ0	PYGO2	Pygopus homolog 2
1084	psites	tmt	0	1.03311	1.04712	0.190945	1.08179	0.111521	0.717176	0.973092	T	544	___1	HTLDDRTQLWASEPGTPPLPTSLPSQNPILK	Q9BXP5	Q9BXP5	SRRT	Serrate RNA effector molecule homolog
1085	psites	tmt	0	0.656319	1.18569	0.432236	0.77819	0.312016	0.275766	0.855969	T	182	___1	DESSKPGKNKRTAITTPNFKKLHEAHFKEME	Q9BXS6	Q9BXS6	NUSAP1	Nucleolar and spindle-associated protein 1
1086	psites	tmt	0	1.07447	1.05885	0.201504	1.1377	0.219683	0.70931	0.972075	T	976	___1	ETSWSGEERAAKVPSTPPPKAAPPPPALTPD	Q9H7N4	Q9H7N4	SCAF1	Splicing factor, arginine/serine-rich 19
1087	psites	tmt	0	0.842418	1.07293	0.0917281	0.903852	0.0651517	0.0257466	0.823508	T	899	___1	APVSSTESVIQSNTPTPPPSQPLNETAEEES	Q9HC35	Q9HC35	EML4	Echinoderm microtubule-associated protein-like 4
1088	psites	tmt	0	0.749654	1.20309	0.162823	0.9019	0.32474	0.358392	0.874972	T	445	___1	PDPKDTIIDVVGAPLTPNSRKRRESASSSSS	Q9NPF5	Q9NPF5	DMAP1	DNA methyltransferase 1-associated protein 1
1089	psites	tmt	0	0.759647	1.01152	0.230202	0.768398	0.166096	0.200164	0.834648	T	29	___1	VKLKVGKKKPKLQNATPTNFKTKTIHLPEQL	Q9NXF1	Q9NXF1	TEX10	Testis-expressed sequence 10 protein
1090	psites	tmt	0	1.03377	0.955407	0.106663	0.987667	0.196212	0.863282	0.986664	T	692	___1	GGDLSPPDSPEPKAITPPQQPYKKRPKICCP	Q9NYV4	Q9NYV4	CDK12	Cyclin-dependent kinase 12
1091	psites	tmt	0	1.28966	0.897019	0.0413451	1.15685	0.334372	0.45009	0.902495	T	893	___1	FGLARLYNSEESRPYTNKVITLWYRPPELLL	Q9NYV4	Q9NYV4	CDK12	Cyclin-dependent kinase 12
1092	psites	tmt	0	0.939046	0.944843	0.156214	0.887251	0.178395	0.667899	0.960786	T	184	___1	DVKLADFGVAGQLTDTQIKRNTFVGTPFWMA;EVKLADFGVAGQLTDTQIKRNTFVGTPFWMA	Q9P289;Q9Y6E0	Q9Y6E0	STK26;STK25;STK24	Serine/threonine-protein kinase 26;Serine/threonine-protein kinase 25;Serine/threonine-protein kinase 24;Serine/threonine-protein kinase 24 36 kDa subunit;Serine/threonine-protein kinase 24 12 kDa subunit
1093	psites	tmt	0	1.08887	1.09987	0.0404869	1.19762	0.190993	0.556391	0.936012	T	225	___1	KKAEGAPNQGRKAEGTPNQGKKTEGTPNQGK	Q9P2E9	Q9P2E9	RRBP1	Ribosome-binding protein 1
1094	psites	tmt	0	1.19608	1.00422	0.015848	1.20112	0.081084	0.0935966	0.834648	T	275	___1	KKAEGAQNQGKKVDTTPNQGKKVEGAPTQGR	Q9P2E9	Q9P2E9	RRBP1	Ribosome-binding protein 1
1095	psites	tmt	0	1.16482	0.940171	0.128459	1.09513	0.183578	0.277738	0.855969	T	254	___1	LSEGSQPAEEEEDQETPSRNLRVRADRNLKT	Q9UKV3	Q9UKV3	ACIN1	Apoptotic chromatin condensation inducer in the nucleus
1096	psites	tmt	0	0.946578	1.0224	0.198987	0.967782	0.0890464	0.74918	0.98231	T	414	___1	ASLVALPEQTASEEETPPPLLTKEASSPPPH	Q9UKV3	Q9UKV3	ACIN1	Apoptotic chromatin condensation inducer in the nucleus
1097	psites	tmt	0	1.01431	0.995931	0.0446158	1.01018	0.218036	0.993333	1	T	1003	___1	SHSGSISPYPKVKAQTPPGPSLSGSKSPCPQ	Q9UQ35	Q9UQ35	SRRM2	Serine/arginine repetitive matrix protein 2
1098	psites	tmt	0	1.12134	0.969173	0.135597	1.08678	0.185903	0.450238	0.902495	T	1177	___1	AESKEKMALPPQEDATASPPRQKDKFSPFPV	Q9UQ35	Q9UQ35	SRRM2	Serine/arginine repetitive matrix protein 2
1099	psites	tmt	0	1.04918	0.941707	0.149109	0.988025	0.271689	0.858198	0.986664	T	2397	___1	SPRVPLSAYERVSGRTSPPLLDRARSRTPPS	Q9UQ35	Q9UQ35	SRRM2	Serine/arginine repetitive matrix protein 2
1100	psites	tmt	0	1.35818	0.917738	0.190197	1.24646	0.241399	0.164355	0.834648	T	130	___1	AREVLLASQKTDAEATDTEATET________	Q9Y3D3	Q9Y3D3	MRPS16	28S ribosomal protein S16, mitochondrial
1101	psites	tmt	0	1.25056	1.0065	0.17154	1.25869	0.228219	0.284983	0.855969	T	242	___1	TKGHLDAELDAYMAQTDPETND_________	Q9Y3Y2	Q9Y3Y2	CHTOP	Chromatin target of PRMT1 protein
1102	psites	tmt	0	0.593402	1.17763	0.296575	0.698808	0.406262	0.27487	0.855969	T	24	___1	TPGSRLGAPENSGISTLERGQKPPPTPSGKL	Q9Y4F1	Q9Y4F1	FARP1	FERM, RhoGEF and pleckstrin domain-containing protein 1
1103	psites	tmt	0	0.89636	0.972627	0.12109	0.871824	0.213	0.5707	0.936012	T	1843	___1	MVDAIAEAMSKLDEGTPPEPKGTFVDYQTTV	Q9Y4G6	Q9Y4G6	TLN2	Talin-2
1104	psites	tmt	0	1.06778	0.905369	0.0792604	0.966736	0.174181	0.554729	0.936012	T	426	___1	AKVPSPLEGSEGDGDTD______________	Q9Y606	Q9Y606	PUS1	tRNA pseudouridine synthase A, mitochondrial
1105	psites	tmt	0	1.13774	1.08079	0.0576697	1.22967	0.081198	0.0381716	0.834648	Y	1172	___1	WAQKGSHQISLDNPDYQQDFFPKEAKPNGIF	P00533	P00533	EGFR	Epidermal growth factor receptor
1106	psites	tmt	0	1.28779	1.00239	0.131562	1.29086	0.1363	0.0470111	0.834648	Y	1092	___1	LTEDSIDDTFLPVPEYINQSVPKRPAGSVQN	P00533	P00533	EGFR	Epidermal growth factor receptor
1107	psites	tmt	0	0.986552	1.06364	0.106341	1.04934	0.132571	0.883437	0.986664	Y	505	___1	LRSVLEDFFTATEGQYQPQP___________	P06239	P06239	LCK	Tyrosine-protein kinase Lck
1108	psites	tmt	0	0.946523	1.10443	0.101441	1.04537	0.167466	0.565422	0.936012	Y	15	___1	_MEDYTKIEKIGEGTYGVVYKGRHKTTGQVV	P06493	P06493	CDK1;CDK2;CDK3	Cyclin-dependent kinase 1;Cyclin-dependent kinase 2;Cyclin-dependent kinase 3
1109	psites	tmt	0	0.778717	1.49169	0.28805	1.1616	0.106887	0.267769	0.855969	Y	508	___1	LQSVLDDFYTATEGQYQQQP___________	P07948	P07948	LYN	Tyrosine-protein kinase Lyn
1110	psites	tmt	0	0.919374	1.18051	0.0114157	1.08533	0.0116031	0.018236	0.812212	Y	798	___1	FCYKVVQEYIDAFSDYANFK___________	P18433	P18433	PTPRA	Receptor-type tyrosine-protein phosphatase alpha
1111	psites	tmt	0	0.856411	1.06672	0.0484148	0.913552	0.152392	0.293359	0.858718	Y	204	___1	RIADPEHDHTGFLTEYVATRWYRAPEIMLNS	P27361	P27361	MAPK3	Mitogen-activated protein kinase 3
1112	psites	tmt	0	1.03818	1.09977	0.0515765	1.14176	0.15028	0.743135	0.98231	Y	427	___1	PPPPCPGRELFDDPSYVNVQNLDKARQAVGG	P29353	P29353	SHC1	SHC-transforming protein 1
1113	psites	tmt	0	0.962027	1.04321	0.0441892	1.00359	0.1852	0.610333	0.948	Y	216	___1	FGSAKQLVRGEPNVSYICSRYYRAPELIFGA	P49840;P49841	P49841	GSK3A;GSK3B	Glycogen synthase kinase-3 alpha;Glycogen synthase kinase-3 beta
1114	psites	tmt	0	0.944242	1.1822	0.0928709	1.11628	0.243674	0.741939	0.98231	Y	62	___1	RNGAVTHIKIQNTGDYYDLYGGEKFATLAEL	Q06124	Q06124	PTPN11	Tyrosine-protein phosphatase non-receptor type 11
1115	psites	tmt	0	1.11167	0.852204	0.0558647	0.947374	0.123416	0.174022	0.834648	Y	849	___1	DFGSASHVADNDITPYLVSRFYRAPEIIIGK	Q13523	Q13523	PRPF4B	Serine/threonine-protein kinase PRP4 homolog
1116	psites	tmt	0	1.01768	0.936105	0.036965	0.952652	0.0885188	0.767439	0.98551	Y	273	___1	VDFGSSCQLGQRIYQYIQSRFYRSPEVLLGT	Q9Y463	Q9Y463	DYRK1B;DYRK1A	Dual specificity tyrosine-phosphorylation-regulated kinase 1B;Dual specificity tyrosine-phosphorylation-regulated kinase 1A
1117	psites	tmt	0	1.03109	0.986594	0.123738	1.01726	0.253222	0.936276	0.996209	Y	447	___1	PCFKALRERLSSFTSYENPT___________	Q13882	Q13882	PTK6	Protein-tyrosine kinase 6
1118	psites	tmt	0	1.27755	1.03351	0.0647347	1.32035	0.0670335	0.0103486	0.73174	Y	417	___1	HTTRARRSQESDGVEYIFISKHLFETDVQNN	Q5T2T1	Q5T2T1	MPP7	MAGUK p55 subfamily member 7
1119	psites	tmt	0	1.06684	0.905672	0.166613	0.966211	0.110452	0.567083	0.936012	Y	631	___1	YQLEAELPEKYSQNIYIQNRNIQTDNNKSIG	Q99959	Q99959	PKP2	Plakophilin-2
1120	psites	tmt	0	1.12377	0.92151	0.0832329	1.03557	0.0691333	0.265498	0.855969	Y	144	___1	KEMAKGVAVKVEEPRYKKDKQLNEKISLLRS	Q9BQ69	Q9BQ69	MACROD1	O-acetyl-ADP-ribose deacetylase MACROD1
1121	psites	tmt	0	1.07795	1.00925	0.17533	1.08792	0.170112	0.618285	0.948	S	758	___2	SPGHISVKEPTPSIASDISLPIATQELRQRL	A0FGR8	A0FGR8	ESYT2	Extended synaptotagmin-2
1122	psites	tmt	0	1.07795	1.00925	0.17533	1.08792	0.170112	0.618285	0.948	S	761	___2	HISVKEPTPSIASDISLPIATQELRQRLRQL	A0FGR8	A0FGR8	ESYT2	Extended synaptotagmin-2
1123	psites	tmt	0	1.23676	0.880508	0.231322	1.08898	0.134778	0.365398	0.874972	S	779	___2	DPEPVPPVGSKRQVGSRPTSWALFELPGPSQ	A1L390	A1L390	PLEKHG3	Pleckstrin homology domain-containing family G member 3
1124	psites	tmt	0	0.975149	0.958618	0.104983	0.934795	0.167505	0.853132	0.986664	S	643	___2	GFGSPRLVSRSSSVLSLEGSEKGLARHGSAT	A1L390	A1L390	PLEKHG3	Pleckstrin homology domain-containing family G member 3
1125	psites	tmt	0	0.936052	1.10515	0.0528641	1.03448	0.0833791	0.298634	0.858718	S	155	___2	KRASLPAGLVGTPPESPSEPREDVLGFLPGP	A6NDB9	A6NDB9	PALM3	Paralemmin-3
1126	psites	tmt	0	1.17575	0.977744	0.1389	1.14958	0.300642	0.481509	0.90494	S	44	___2	ARAAAAAARLHGGFDSDCSEDGEALNGEPEL	O00178	O00178	GTPBP1	GTP-binding protein 1
1127	psites	tmt	0	1.17575	0.977744	0.1389	1.14958	0.300642	0.481509	0.90494	S	47	___2	AAAAARLHGGFDSDCSEDGEALNGEPELDLT	O00178	O00178	GTPBP1	GTP-binding protein 1
1128	psites	tmt	0	1.11573	0.91767	0.101428	1.02388	0.159962	0.404307	0.89152	S	298	___2	AQPSDNAPAKGNKSPSPPDGSPAATPEIRVN	O00499	O00499	BIN1	Myc box-dependent-interacting protein 1
1129	psites	tmt	0	1.11573	0.91767	0.101428	1.02388	0.159962	0.404307	0.89152	S	303	___2	NAPAKGNKSPSPPDGSPAATPEIRVNHEPEP	O00499	O00499	BIN1	Myc box-dependent-interacting protein 1
1130	psites	tmt	0	0.976259	1.04759	0.213021	1.02272	0.0850182	0.917984	0.991742	S	569	___2	SGSKKKRKFSKEEPVSSGPEEAVGKSSSKKK	O00567	O00567	NOP56	Nucleolar protein 56
1131	psites	tmt	0	0.976259	1.04759	0.213021	1.02272	0.0850182	0.917984	0.991742	S	570	___2	GSKKKRKFSKEEPVSSGPEEAVGKSSSKKKK	O00567	O00567	NOP56	Nucleolar protein 56
1132	psites	tmt	0	0.805894	1.04286	0.0994597	0.840431	0.418593	0.387166	0.880719	S	519	___2	SKPKKKKSFSKEELMSSDLEETAGSTSIPKR	O00567	O00567	NOP56	Nucleolar protein 56
1133	psites	tmt	0	0.805894	1.04286	0.0994597	0.840431	0.418593	0.387166	0.880719	S	520	___2	KPKKKKSFSKEELMSSDLEETAGSTSIPKRK	O00567	O00567	NOP56	Nucleolar protein 56
1134	psites	tmt	0	2.21462	0.629021	0.142694	1.39304	0.00514175	0.0156538	0.768492	S	19	___2	KRTKTKTKKRPQRATSNVFAMFDQSQIQEFK	P19105	P19105	MYL12A;MYL12B;MYL9	Myosin regulatory light chain 12A;Myosin regulatory light chain 12B;Myosin regulatory light polypeptide 9
1135	psites	tmt	0	0.726764	1.18609	0.210913	0.862004	0.44902	0.423218	0.896798	S	445	___2	QEWKDEKRDLLTEGQSFSSLDEEALGSRHRP	O14986	O14986	PIP5K1B	Phosphatidylinositol 4-phosphate 5-kinase type-1 beta
1136	psites	tmt	0	0.726764	1.18609	0.210913	0.862004	0.44902	0.423218	0.896798	S	448	___2	KDEKRDLLTEGQSFSSLDEEALGSRHRPDLV	O14986	O14986	PIP5K1B	Phosphatidylinositol 4-phosphate 5-kinase type-1 beta
1137	psites	tmt	0	0.954989	0.998234	0.0612474	0.953302	0.0285472	0.221415	0.835963	S	576	___2	PARSATPKVRLVEPHSPSPSSKFSTKGLCKK	O15014	O15014	ZNF609	Zinc finger protein 609
1138	psites	tmt	0	0.954989	0.998234	0.0612474	0.953302	0.0285472	0.221415	0.835963	S	578	___2	RSATPKVRLVEPHSPSPSSKFSTKGLCKKKL	O15014	O15014	ZNF609	Zinc finger protein 609
1139	psites	tmt	0	0.970901	1.02092	0.0961975	0.991216	0.103074	0.685357	0.967752	S	946	___2	TSPSPSRSSSGRRVKSPSPKSERSERSERSH	O15042	O15042	U2SURP	U2 snRNP-associated SURP motif-containing protein
1140	psites	tmt	0	0.970901	1.02092	0.0961975	0.991216	0.103074	0.685357	0.967752	S	948	___2	PSPSRSSSGRRVKSPSPKSERSERSERSHKE	O15042	O15042	U2SURP	U2 snRNP-associated SURP motif-containing protein
1141	psites	tmt	0	0.749055	1.10413	0.156803	0.827057	0.133077	0.0721656	0.834648	S	251	___2	SLMNRNSVLSDPGLDSPRTSPVIMARVAQHH	O15085	O15085	ARHGEF11	Rho guanine nucleotide exchange factor 11
1142	psites	tmt	0	0.80239	1.00492	0.0296564	0.806337	0.182485	0.224496	0.835963	S	255	___2	RNSVLSDPGLDSPRTSPVIMARVAQHHRRQG	O15085	O15085	ARHGEF11	Rho guanine nucleotide exchange factor 11
1143	psites	tmt	0	1.16721	0.915362	0.185412	1.06842	0.15356	0.454812	0.902495	S	1025	___2	FPKPEFRNESEDNKFSDDSDDDFVQPRKKRL	O15164	O15164	TRIM24	Transcription intermediary factor 1-alpha
1144	psites	tmt	0	1.16721	0.915362	0.185412	1.06842	0.15356	0.454812	0.902495	S	1028	___2	PEFRNESEDNKFSDDSDDDFVQPRKKRLKSI	O15164	O15164	TRIM24	Transcription intermediary factor 1-alpha
1145	psites	tmt	0	1.13216	0.89609	0.0596106	1.01451	0.156793	0.423363	0.896798	S	908	___2	DPVTYVVQKQFMRQLSALSSDGEGQGRPVPR	O15438	O15438	ABCC3	Canalicular multispecific organic anion transporter 2
1146	psites	tmt	0	1.13216	0.89609	0.0596106	1.01451	0.156793	0.423363	0.896798	S	911	___2	TYVVQKQFMRQLSALSSDGEGQGRPVPRRHL	O15438	O15438	ABCC3	Canalicular multispecific organic anion transporter 2
1147	psites	tmt	0	1.25972	0.930389	0.143547	1.17203	0.0939149	0.0725855	0.834648	S	128	___2	GTLRILEGPQQSLSGSPLQPIPASPPPQIPP	O15446	O15446	CD3EAP	DNA-directed RNA polymerase I subunit RPA34
1148	psites	tmt	0	1.30042	0.880172	0.195195	1.14459	0.108145	0.0479877	0.834648	S	136	___2	PQQSLSGSPLQPIPASPPPQIPPGLRPRFCA	O15446	O15446	CD3EAP	DNA-directed RNA polymerase I subunit RPA34
1149	psites	tmt	0	1.19749	0.967836	0.0836541	1.15898	0.302384	0.360257	0.874972	S	84	___2	KTRDSGKQKAAYGDLSSEEEEENEPESLGVV	O15541	O15541	RNF113A	RING finger protein 113A
1150	psites	tmt	0	1.19749	0.967836	0.0836541	1.15898	0.302384	0.360257	0.874972	S	85	___2	TRDSGKQKAAYGDLSSEEEEENEPESLGVVY	O15541	O15541	RNF113A	RING finger protein 113A
1151	psites	tmt	0	0.867921	1.00974	0.153909	0.876372	0.086635	0.386746	0.880719	S	1568	___2	ESQKSFKFHALSSPQSPFPSTPTSRRALHRT	O43166	O43166	SIPA1L1	Signal-induced proliferation-associated 1-like protein 1
1152	psites	tmt	0	0.874001	1.09709	0.0517077	0.958856	0.176595	0.232897	0.845101	S	439	___2	VPEIVISGNGQPRRRSIQDLTVTGTEPGQVS	O43318	O43318	MAP3K7	Mitogen-activated protein kinase kinase kinase 7
1153	psites	tmt	0	0.726439	1.11692	0.108454	0.811376	0.220512	0.0863157	0.834648	S	77	___2	FEAAATGKEMPQDLRSPARTPPSEEDSAEAE	O43765	O43765	SGTA	Small glutamine-rich tetratricopeptide repeat-containing protein alpha
1154	psites	tmt	0	0.973872	0.954658	0.0709221	0.929715	0.0560644	0.59405	0.941922	S	103	___2	RALLEKNRSYRLLEDSEESSEETVSRAGSSL	O60231	O60231	DHX16	Putative pre-mRNA-splicing factor ATP-dependent RNA helicase DHX16
1155	psites	tmt	0	0.973872	0.954658	0.0709221	0.929715	0.0560644	0.59405	0.941922	S	106	___2	LEKNRSYRLLEDSEESSEETVSRAGSSLQKK	O60231	O60231	DHX16	Putative pre-mRNA-splicing factor ATP-dependent RNA helicase DHX16
1156	psites	tmt	0	1.21406	0.909004	0.118187	1.10359	0.0784941	0.0793232	0.834648	S	116	___2	LFAHFIQPAAQKTPTSPLKMKPGRPRIKKDE	O60264	O60264	SMARCA5	SWI/SNF-related matrix-associated actin-dependent regulator of chromatin subfamily A member 5
1157	psites	tmt	0	1.13029	0.949247	0.00838914	1.07292	0.501509	0.874304	0.986664	S	730	___2	DVAGLDTEGSKQRSASQSSLDKLDQELKEQQ	O60271	O60271	SPAG9	C-Jun-amino-terminal kinase-interacting protein 4
1158	psites	tmt	0	1.13029	0.949247	0.00838914	1.07292	0.501509	0.874304	0.986664	S	733	___2	GLDTEGSKQRSASQSSLDKLDQELKEQQKEL	O60271	O60271	SPAG9	C-Jun-amino-terminal kinase-interacting protein 4
1159	psites	tmt	0	1.01595	0.928614	0.181437	0.943428	0.266986	0.981806	1	S	131	___2	AKVEYREMDESLANLSEDEYYSEEERNAKAE	O60341	O60341	KDM1A	Lysine-specific histone demethylase 1A
1160	psites	tmt	0	1.01595	0.928614	0.181437	0.943428	0.266986	0.981806	1	S	137	___2	EMDESLANLSEDEYYSEEERNAKAEKEKKLP	O60341	O60341	KDM1A	Lysine-specific histone demethylase 1A
1161	psites	tmt	0	0.887381	1.40128	0.174466	1.24347	0.58061	0.696772	0.970243	S	566	___2	SGRFKLDILKNKAKRSLTSSLENIFSRGANR	O60343	O60343	TBC1D4	TBC1 domain family member 4
1162	psites	tmt	0	0.887381	1.40128	0.174466	1.24347	0.58061	0.696772	0.970243	S	570	___2	KLDILKNKAKRSLTSSLENIFSRGANRMRGR	O60343	O60343	TBC1D4	TBC1 domain family member 4
1163	psites	tmt	0	1.16465	1.05807	0.161616	1.23228	0.216459	0.524113	0.930181	S	588	___2	NIFSRGANRMRGRLGSVDSFERSNSLASEKD	O60343	O60343	TBC1D4	TBC1 domain family member 4
1164	psites	tmt	0	1.16465	1.05807	0.161616	1.23228	0.216459	0.524113	0.930181	S	591	___2	SRGANRMRGRLGSVDSFERSNSLASEKDYSP	O60343	O60343	TBC1D4	TBC1 domain family member 4
1165	psites	tmt	0	1.3602	0.833026	0.119852	1.13308	0.0396486	0.0132538	0.73174	S	451	___2	QVVAEAAKTAKRKRESESESDETPPAAPQLI	O60832	O60832	DKC1	H/ACA ribonucleoprotein complex subunit 4
1166	psites	tmt	0	1.3602	0.833026	0.119852	1.13308	0.0396486	0.0132538	0.73174	S	453	___2	VAEAAKTAKRKRESESESDETPPAAPQLIKK	O60832	O60832	DKC1	H/ACA ribonucleoprotein complex subunit 4
1167	psites	tmt	0	1.05121	1.0163	0.0379757	1.06834	0.0500905	0.169715	0.834648	S	135	___2	DSKSKKTAKPKVEMYSGSDDDDDFNKLPKKA	O60841	O60841	EIF5B	Eukaryotic translation initiation factor 5B
1168	psites	tmt	0	1.05121	1.0163	0.0379757	1.06834	0.0500905	0.169715	0.834648	S	137	___2	KSKKTAKPKVEMYSGSDDDDDFNKLPKKAKG	O60841	O60841	EIF5B	Eukaryotic translation initiation factor 5B
1169	psites	tmt	0	1.00853	0.949703	0.0433633	0.957808	0.180876	0.966956	1	S	371	___2	VQELELKLSGQNAMGSQDSLLEITFRSGALP	O75052	O75052	NOS1AP	Carboxyl-terminal PDZ ligand of neuronal nitric oxide synthase protein
1170	psites	tmt	0	1.00853	0.949703	0.0433633	0.957808	0.180876	0.966956	1	S	374	___2	LELKLSGQNAMGSQDSLLEITFRSGALPVLC	O75052	O75052	NOS1AP	Carboxyl-terminal PDZ ligand of neuronal nitric oxide synthase protein
1171	psites	tmt	0	0.970931	1.04874	0.142592	1.01826	0.060233	0.811298	0.986664	S	1696	___2	EGTSNSLSTCTKSGPSPLSSPNGKLTVASPK	O75179	O75179	ANKRD17	Ankyrin repeat domain-containing protein 17
1172	psites	tmt	0	0.95584	1.12248	0.227167	1.07291	0.0317869	0.841957	0.986664	S	1699	___2	SNSLSTCTKSGPSPLSSPNGKLTVASPKRGQ	O75179	O75179	ANKRD17	Ankyrin repeat domain-containing protein 17
1173	psites	tmt	0	0.966013	0.885553	0.0357853	0.855456	0.00620766	0.313817	0.858718	S	1977	___2	SSHRYETPSDAIEVISPASSPAPPQEKLQTY	O75376	O75376	NCOR1	Nuclear receptor corepressor 1
1174	psites	tmt	0	0.935449	0.853416	0.0903877	0.798328	0.107853	0.567596	0.936012	S	1981	___2	YETPSDAIEVISPASSPAPPQEKLQTYQPEV	O75376	O75376	NCOR1	Nuclear receptor corepressor 1
1175	psites	tmt	0	1.03887	1.01926	0.221869	1.05888	0.63956	0.850378	0.986664	S	131	___2	YRRSRSRSYERRRSRSRSFDYNYRRSYSPRN	O75494	O75494	SRSF10	Serine/arginine-rich splicing factor 10
1176	psites	tmt	0	1.12425	0.980125	0.299706	1.1019	0.680491	0.999526	1	S	133	___2	RSRSRSYERRRSRSRSFDYNYRRSYSPRNSR	O75494	O75494	SRSF10	Serine/arginine-rich splicing factor 10
1177	psites	tmt	0	0.953136	1.05144	0.0277888	1.00217	0.0587774	0.261459	0.855969	S	2858	___2	LRKKKMPLTEPLRGRSTSPKPKSVPKDSTDS	O75592	O75592	MYCBP2	E3 ubiquitin-protein ligase MYCBP2
1178	psites	tmt	0	0.99192	1.03784	0.0235543	1.02946	0.048292	0.842762	0.986664	S	2860	___2	KKKMPLTEPLRGRSTSPKPKSVPKDSTDSPG	O75592	O75592	MYCBP2	E3 ubiquitin-protein ligase MYCBP2
1179	psites	tmt	0	0.933587	1.00621	0.011044	0.939387	0.0382036	0.0129697	0.73174	S	324	___2	QPAQQQQPAQQPKKPSPQPSSPRQVKRAVVV	O75909	O75909	CCNK	Cyclin-K
1180	psites	tmt	0	0.91399	1.01071	0.0110848	0.923776	0.0617719	0.0283322	0.834648	S	329	___2	QQPAQQPKKPSPQPSSPRQVKRAVVVSPKEE	O75909	O75909	CCNK	Cyclin-K
1181	psites	tmt	0	1.04299	0.992414	0.136686	1.03508	0.0708834	0.577578	0.936474	S	621	___2	TAGASSELDASKTVSSPPTSPRPGSAATVSA	O76094	O76094	SRP72	Signal recognition particle subunit SRP72
1182	psites	tmt	0	0.9784	1.00731	0.0703497	0.985553	0.0579394	0.708849	0.972075	S	625	___2	SSELDASKTVSSPPTSPRPGSAATVSASTSN	O76094	O76094	SRP72	Signal recognition particle subunit SRP72
1183	psites	tmt	0	0.910074	1.15315	0.103843	1.04945	0.166693	0.552985	0.936012	S	455	___2	AANRSQKASQSRPNSSALETLGGEKLANGSL	O94804	O94804	STK10	Serine/threonine-protein kinase 10
1184	psites	tmt	0	1.15987	0.920468	0.0874841	1.06762	0.353701	0.573435	0.936012	S	27	___2	KSVLPTAIPAVLPAASPCSSPKTGLSARLSN	O94806	O94806	PRKD3	Serine/threonine-protein kinase D3
1185	psites	tmt	0	1.31935	0.902978	0.136735	1.19134	0.44155	0.564789	0.936012	S	31	___2	PTAIPAVLPAASPCSSPKTGLSARLSNGSFS	O94806	O94806	PRKD3	Serine/threonine-protein kinase D3
1186	psites	tmt	0	1.0664	0.928347	0.169539	0.989988	0.0486329	0.628309	0.94819	S	178	___2	LPPAQSPEDRLSTTPSPTSSLHEDGVEDFRR	O94842	O94842	TOX4	TOX high mobility group box family member 4
1187	psites	tmt	0	1.12958	1.0388	0.45299	1.1734	0.339748	0.694249	0.9695	S	323	___2	GAQSERFPSNLEVEASPQASSAEVNASPLWN	O94864	O94864	SUPT7L	STAGA complex 65 subunit gamma
1188	psites	tmt	0	1.06631	1.06753	0.39456	1.13832	0.325758	0.811995	0.986664	S	334	___2	EVEASPQASSAEVNASPLWNLAHVKMEPQES	O94864	O94864	SUPT7L	STAGA complex 65 subunit gamma
1189	psites	tmt	0	0.630828	1.17575	0.010088	0.741699	0.283453	0.141565	0.834648	S	370	___2	KELDQLDSKSKSKSKSPSPLKNKLSHTKDLK	O94913	O94913	PCF11	Pre-mRNA cleavage complex 2 protein Pcf11
1190	psites	tmt	0	0.630828	1.17575	0.010088	0.741699	0.283453	0.141565	0.834648	S	372	___2	LDQLDSKSKSKSKSPSPLKNKLSHTKDLKNQ	O94913	O94913	PCF11	Pre-mRNA cleavage complex 2 protein Pcf11
1191	psites	tmt	0	0.914143	1.05123	0.0729414	0.960975	0.0431441	0.0777678	0.834648	S	494	___2	RSRSRSPKSRSPIIHSPKRRDRRSPKRRQRS	O94913	O94913	PCF11	Pre-mRNA cleavage complex 2 protein Pcf11
1192	psites	tmt	0	1.10063	1.09051	0.108723	1.20025	0.0137395	0.201668	0.834648	S	2317	___2	PKMKKTPEKLDNTPASPPRSPAEPNDIPIAK	O95359	O95359	TACC2	Transforming acidic coiled-coil-containing protein 2
1193	psites	tmt	0	1.10063	1.09051	0.108723	1.20025	0.0137395	0.201668	0.834648	S	2321	___2	KTPEKLDNTPASPPRSPAEPNDIPIAKGTYT	O95359	O95359	TACC2	Transforming acidic coiled-coil-containing protein 2
1194	psites	tmt	0	1.09466	0.861535	0.00742909	0.943088	0.110533	0.381421	0.879147	S	619	___2	GRKKAKKLKRMKKELSPAGSISKNSPATLFE	O95453	O95453	PARN	Poly(A)-specific ribonuclease PARN
1195	psites	tmt	0	1.09466	0.861535	0.00742909	0.943088	0.110533	0.381421	0.879147	S	623	___2	AKKLKRMKKELSPAGSISKNSPATLFEVPDT	O95453	O95453	PARN	Poly(A)-specific ribonuclease PARN
1196	psites	tmt	0	0.86622	1.09568	0.0474293	0.949098	0.0526676	0.00701165	0.723135	S	1052	___2	DRAMNHLSRVHGEPTSDLSDID_________	O95696	O95696	BRD1	Bromodomain-containing protein 1
1197	psites	tmt	0	0.86622	1.09568	0.0474293	0.949098	0.0526676	0.00701165	0.723135	S	1055	___2	MNHLSRVHGEPTSDLSDID____________	O95696	O95696	BRD1	Bromodomain-containing protein 1
1198	psites	tmt	0	0.70134	1.18008	0.237749	0.827634	0.11134	0.106118	0.834648	S	386	___2	VPCPPPSPGPSAVPSSPKSVATEERAAPSTA	O95817	O95817	BAG3	BAG family molecular chaperone regulator 3
1199	psites	tmt	0	1.17857	1.2076	0.113032	1.42324	0.273517	0.363907	0.874972	S	1166	___2	FDSPAHWAQKGSHQISLDNPDYQQDFFPKEA	P00533	P00533	EGFR	Epidermal growth factor receptor
1200	psites	tmt	0	0.961763	1.11494	0.0470591	1.07231	0.0442584	0.273623	0.855969	S	991	___2	QRYLVIQGDERMHLPSPTDSNFYRALMDEED	P00533	P00533	EGFR	Epidermal growth factor receptor
1201	psites	tmt	0	0.954399	1.10627	0.0429064	1.05583	0.0442349	0.176095	0.834648	S	995	___2	VIQGDERMHLPSPTDSNFYRALMDEEDMDDV	P00533	P00533	EGFR	Epidermal growth factor receptor
1202	psites	tmt	0	0.973863	0.967678	0.358516	0.942386	0.210188	0.990457	1	S	1039	___2	FSSPSTSRTPLLSSLSATSNNSTVACIDRNG	P00533	P00533	EGFR	Epidermal growth factor receptor
1203	psites	tmt	0	0.956204	1.09244	0.111283	1.04459	0.0774337	0.575973	0.936012	S	1042	___2	PSTSRTPLLSSLSATSNNSTVACIDRNGLQS	P00533	P00533	EGFR	Epidermal growth factor receptor
1204	psites	tmt	0	0.975145	1.12765	0.082113	1.09963	0.145073	0.727693	0.977557	S	1045	___2	SRTPLLSSLSATSNNSTVACIDRNGLQSCPI	P00533	P00533	EGFR	Epidermal growth factor receptor
1205	psites	tmt	0	1.14862	1.08381	0.111778	1.24489	0.0636231	0.0785597	0.834648	S	62	___2	EDIWKKFELLPTPPLSPSRRSGLCSPSYVAV	P01106	P01106	MYC;MYCN	Myc proto-oncogene protein;N-myc proto-oncogene protein
1206	psites	tmt	0	0.737368	1.01257	0.0456909	0.746638	0.185415	0.147742	0.834648	S	352	___2	SDRKGGSYSQAASSDSAQGSDVSLTACKV__	P01891;P10316	P10316	HLA-A	HLA class I histocompatibility antigen, A-68 alpha chain;HLA class I histocompatibility antigen, A-80 alpha chain;HLA class I histocompatibility antigen, A-69 alpha chain;HLA class I histocompatibility antigen, A-2 alpha chain
1207	psites	tmt	0	0.737368	1.01257	0.0456909	0.746638	0.185415	0.147742	0.834648	S	356	___2	GGSYSQAASSDSAQGSDVSLTACKV______	P01891;P10316	P10316	HLA-A	HLA class I histocompatibility antigen, A-68 alpha chain;HLA class I histocompatibility antigen, A-80 alpha chain;HLA class I histocompatibility antigen, A-69 alpha chain;HLA class I histocompatibility antigen, A-2 alpha chain
1208	psites	tmt	0	1.0382	0.987423	0.0301625	1.02514	0.0690239	0.386533	0.880719	S	390	___2	AYRKLLEGEEERLRLSPSPTSQRSRGRASSH	P02545	P02545	LMNA	Prelamin-A/C;Lamin-A/C
1209	psites	tmt	0	1.07878	0.974387	0.0241656	1.05115	0.0311815	0.113139	0.834648	S	392	___2	RKLLEGEEERLRLSPSPTSQRSRGRASSHSS	P02545	P02545	LMNA	Prelamin-A/C;Lamin-A/C
1210	psites	tmt	0	0.905377	1.11158	0.112363	1.0064	0.0294182	0.361888	0.874972	S	1054	___2	AGGMVHHRHRSSSTRSGGGDLTLGLEPSEEE	P04626	P04626	ERBB2	Receptor tyrosine-protein kinase erbB-2
1211	psites	tmt	0	0.990137	1.07559	0.120374	1.06498	0.0592739	0.942918	0.996956	S	101	___2	AAPAEEKKVEAKKEESEESDDDMGFGLFD__	P05386	P05386	RPLP1	60S acidic ribosomal protein P1
1212	psites	tmt	0	0.990137	1.07559	0.120374	1.06498	0.0592739	0.942918	0.996956	S	104	___2	AEEKKVEAKKEESEESDDDMGFGLFD_____	P05386	P05386	RPLP1	60S acidic ribosomal protein P1
1213	psites	tmt	0	0.990109	1.07541	0.120268	1.06477	0.0590888	0.942515	0.996956	S	102	___2	APAAAEEKKDEKKEESEESDDDMGFGLFD__	P05387	P05387	RPLP2	60S acidic ribosomal protein P2
1214	psites	tmt	0	0.990109	1.07541	0.120268	1.06477	0.0590888	0.942515	0.996956	S	105	___2	AAEEKKDEKKEESEESDDDMGFGLFD_____	P05387	P05387	RPLP2	60S acidic ribosomal protein P2
1215	psites	tmt	0	1.04425	0.988392	0.147939	1.03212	0.223113	0.798617	0.986664	S	304	___2	PAAAAAPAKVEAKEESEESDEDMGFGLFD__	P05388	P05388	RPLP0;RPLP0P6	60S acidic ribosomal protein P0;60S acidic ribosomal protein P0-like
1216	psites	tmt	0	1.04425	0.988392	0.147939	1.03212	0.223113	0.798617	0.986664	S	307	___2	AAAPAKVEAKEESEESDEDMGFGLFD_____	P05388	P05388	RPLP0;RPLP0P6	60S acidic ribosomal protein P0;60S acidic ribosomal protein P0-like
1217	psites	tmt	0	1.14042	1.14265	0.261511	1.3031	0.510659	0.820824	0.986664	S	807	___2	FPSSPLRIPGGNIYISPLKSPYKISEGLPTP	P06400	P06400	RB1	Retinoblastoma-associated protein
1218	psites	tmt	0	1.14042	1.14265	0.261511	1.3031	0.510659	0.820824	0.986664	S	811	___2	PLRIPGGNIYISPLKSPYKISEGLPTPTKMT	P06400	P06400	RB1	Retinoblastoma-associated protein
1219	psites	tmt	0	0.967641	1.11019	0.0958	1.07427	0.104605	0.656133	0.958951	S	249	___2	LLKEPYKTAVIPINGSPRTPRRGQNRSARIA	P06400	P06400	RB1	Retinoblastoma-associated protein
1220	psites	tmt	0	1.1351	0.917892	0.132196	1.0419	0.076863	0.220602	0.835963	S	880	___2	KEKTGKEYIPGQPPLSQSSDSSPTRNSEPAG	P07814	P07814	EPRS	Bifunctional glutamate/proline--tRNA ligase;Glutamate--tRNA ligase;Proline--tRNA ligase
1221	psites	tmt	0	1.02262	0.973486	0.0750586	0.995503	0.148334	0.862945	0.986664	S	882	___2	KTGKEYIPGQPPLSQSSDSSPTRNSEPAGLE	P07814	P07814	EPRS	Bifunctional glutamate/proline--tRNA ligase;Glutamate--tRNA ligase;Proline--tRNA ligase
1222	psites	tmt	0	1.99666	0.648873	0.613561	1.29558	0.384053	0.296937	0.858718	S	293	___2	GPILMELQTYRYHGHSMSDPGVSYRTREEIQ	P08559	P08559	PDHA1;PDHA2	Pyruvate dehydrogenase E1 component subunit alpha, somatic form, mitochondrial;Pyruvate dehydrogenase E1 component subunit alpha, testis-specific form, mitochondrial
1223	psites	tmt	0	1.99666	0.648873	0.613561	1.29558	0.384053	0.296937	0.858718	S	300	___2	QTYRYHGHSMSDPGVSYRTREEIQEVRSKSD	P08559	P08559	PDHA1;PDHA2	Pyruvate dehydrogenase E1 component subunit alpha, somatic form, mitochondrial;Pyruvate dehydrogenase E1 component subunit alpha, testis-specific form, mitochondrial
1224	psites	tmt	0	1.17347	1.01461	0.183096	1.1906	0.410594	0.658814	0.9594	S	249	___2	VSRGPDKLLPYPTLASPASD___________	P0C1Z6	P0C1Z6	TFPT	TCF3 fusion partner
1225	psites	tmt	0	1.17347	1.01461	0.183096	1.1906	0.410594	0.658814	0.9594	S	252	___2	GPDKLLPYPTLASPASD______________	P0C1Z6	P0C1Z6	TFPT	TCF3 fusion partner
1226	psites	tmt	0	1.02192	1.12383	0.25251	1.14847	0.203083	0.882908	0.986664	S	64	___2	KKAPAGQEEPGTPPSSPLSAEQLDRIQRNKA	P13051	P13051	UNG	Uracil-DNA glycosylase
1227	psites	tmt	0	0.825351	1.3849	0.326324	1.14303	0.366437	0.630333	0.948723	S	641	___2	NEADAAQGYRYPRPASVPPSPSLSRHSSPHQ	P13807	P13807	GYS1	Glycogen [starch] synthase, muscle
1228	psites	tmt	0	1.01311	0.956432	0.187184	0.968971	0.142236	0.879014	0.986664	S	78	___2	PPEPGPDRVADAKGDSESEEDEDLEVPVPSR	P13861	P13861	PRKAR2A	cAMP-dependent protein kinase type II-alpha regulatory subunit
1229	psites	tmt	0	1.01311	0.956432	0.187184	0.968971	0.142236	0.879014	0.986664	S	80	___2	EPGPDRVADAKGDSESEEDEDLEVPVPSRFN	P13861	P13861	PRKAR2A	cAMP-dependent protein kinase type II-alpha regulatory subunit
1230	psites	tmt	0	1.03014	0.988284	0.0478504	1.01807	0.186429	0.859081	0.986664	S	2821	___2	ASVSSKGLPSPYNMSSAPGSRSGSRSGSRSG	P15924	P15924	DSP	Desmoplakin
1231	psites	tmt	0	1.0397	0.984377	0.047844	1.02346	0.184983	0.781788	0.986664	S	2825	___2	SKGLPSPYNMSSAPGSRSGSRSGSRSGSRSG	P15924	P15924	DSP	Desmoplakin
1232	psites	tmt	0	1.17685	0.897446	0.112961	1.05616	0.0314806	0.0327522	0.834648	S	1454	___2	GEHLVNGRMDFAFPGSTNSLHRMTTTSAAAY	P16144	P16144	ITGB4	Integrin beta-4
1233	psites	tmt	0	1.23669	0.892043	0.106969	1.10318	0.0795918	0.0191708	0.812212	S	1457	___2	LVNGRMDFAFPGSTNSLHRMTTTSAAAYGTH	P16144	P16144	ITGB4	Integrin beta-4
1234	psites	tmt	0	1.00709	0.968097	0.108722	0.97496	0.238661	0.947288	0.996956	S	16	___2	MASSDIQVKELEKRASGQAFELILSPRSKES	P16949	P16949	STMN1	Stathmin
1235	psites	tmt	0	1.00709	0.968097	0.108722	0.97496	0.238661	0.947288	0.996956	S	25	___2	ELEKRASGQAFELILSPRSKESVPEFPLSPP	P16949	P16949	STMN1	Stathmin
1236	psites	tmt	0	1.01108	0.982868	0.0750988	0.993754	0.217299	0.971023	1	S	102	___2	PKKLEKEEEEGISQESSEEEQ__________	P17096	P17096	HMGA1	High mobility group protein HMG-I/HMG-Y
1237	psites	tmt	0	1.01108	0.982868	0.0750988	0.993754	0.217299	0.971023	1	S	103	___2	KKLEKEEEEGISQESSEEEQ___________	P17096	P17096	HMGA1	High mobility group protein HMG-I/HMG-Y
1238	psites	tmt	0	0.780077	1.21838	0.178082	0.950432	0.0864709	0.0977102	0.834648	S	255	___2	KDEPQTVPDVPSFGESPPLSPIDMDTQERIK	P17535	P17535	JUND	Transcription factor jun-D
1239	psites	tmt	0	0.780077	1.21838	0.178082	0.950432	0.0864709	0.0977102	0.834648	S	259	___2	QTVPDVPSFGESPPLSPIDMDTQERIKAERK	P17535	P17535	JUND	Transcription factor jun-D
1240	psites	tmt	0	0.908389	0.909299	0.163854	0.825998	0.214851	0.651881	0.958951	S	2011	___2	SRRRRSRSVVRRRSFSISPVRLRRSRTPLRR	P18583	P18583	SON	Protein SON
1241	psites	tmt	0	0.908389	0.909299	0.163854	0.825998	0.214851	0.651881	0.958951	S	2013	___2	RRRSRSVVRRRSFSISPVRLRRSRTPLRRRF	P18583	P18583	SON	Protein SON
1242	psites	tmt	0	1.14442	1.01865	0.123663	1.16577	0.146922	0.234243	0.845101	S	66	___2	SPVKRPGRKAARVLGSEGEEEDEALSPAKGQ	P18858	P18858	LIG1	DNA ligase 1
1243	psites	tmt	0	1.14442	1.01865	0.123663	1.16577	0.146922	0.234243	0.845101	S	76	___2	ARVLGSEGEEEDEALSPAKGQKPALDCSQVS	P18858	P18858	LIG1	DNA ligase 1
1244	psites	tmt	0	1.02224	0.948607	0.0285722	0.969708	0.13121	0.841382	0.986664	S	23	___2	PPRMGSRAGGPTTPLSPTRLSRLQEKEELRE	P20700	P20700	LMNB1	Lamin-B1
1245	psites	tmt	0	1.00849	1.11908	0.057097	1.12858	0.0996662	0.92527	0.991803	S	405	___2	AYRKLLEGEEERLKLSPSPSSRVTVSRASSS;AYRKLLEGEEERLKLSPSPSSRVTVSRATSS	P20700;Q03252	Q03252	LMNB1;LMNB2	Lamin-B1;Lamin-B2
1246	psites	tmt	0	1.00668	1.12619	0.0592695	1.13372	0.105276	0.954793	0.998395	S	407	___2	RKLLEGEEERLKLSPSPSSRVTVSRASSSRS;RKLLEGEEERLKLSPSPSSRVTVSRATSSSS	P20700;Q03252	Q03252	LMNB1;LMNB2	Lamin-B1;Lamin-B2
1247	psites	tmt	0	1.06596	0.985884	0.204999	1.05092	0.0877245	0.524547	0.930181	S	589	___2	GILKVGDFGLAREYGSPLKAYTPVVVTLWYR	P21127	P21127	CDK11B	Cyclin-dependent kinase 11B
1248	psites	tmt	0	1.17541	0.958197	0.01239	1.12627	0.0942947	0.0478873	0.834648	S	190	___2	ALELAKAKAVKMLAESDESGDEESVSQTDKT	P22059	P22059	OSBP	Oxysterol-binding protein 1
1249	psites	tmt	0	1.17541	0.958197	0.01239	1.12627	0.0942947	0.0478873	0.834648	S	193	___2	LAKAKAVKMLAESDESGDEESVSQTDKTELQ	P22059	P22059	OSBP	Oxysterol-binding protein 1
1250	psites	tmt	0	1.04601	0.990533	0.190196	1.03611	0.183545	0.728652	0.977557	S	1913	___2	TSPVYTPTSPKYSPTSPTYSPTSPKYSPTSP	P24928	P24928	POLR2A	DNA-directed RNA polymerase II subunit RPB1
1251	psites	tmt	0	0.851185	1.09521	0.077326	0.932231	0.0694012	0.0549971	0.834648	S	1920	___2	TSPKYSPTSPTYSPTSPKYSPTSPTYSPTSP	P24928	P24928	POLR2A	DNA-directed RNA polymerase II subunit RPB1
1252	psites	tmt	0	1.36112	1.05747	0.371815	1.43935	0.0544027	0.334023	0.866244	S	298	___2	ADTTTPTPTAILAPGSPASPPGSLEPKAARL	P25440	P25440	BRD2	Bromodomain-containing protein 2
1253	psites	tmt	0	1.36112	1.05747	0.371815	1.43935	0.0544027	0.334023	0.866244	S	301	___2	TTPTPTAILAPGSPASPPGSLEPKAARLPPM	P25440	P25440	BRD2	Bromodomain-containing protein 2
1254	psites	tmt	0	1.05334	1.00687	0.0714312	1.06058	0.0372577	0.313453	0.858718	S	737	___2	KQRYLFAKAGYPLRRSQSLPTTLLSPVRVVS	P28290	P28290	SSFA2	Sperm-specific antigen 2
1255	psites	tmt	0	1.0059	1.01741	0.0506818	1.02342	0.0578904	0.890379	0.987496	S	739	___2	RYLFAKAGYPLRRSQSLPTTLLSPVRVVSSV	P28290	P28290	SSFA2	Sperm-specific antigen 2
1256	psites	tmt	0	1.30356	1.2444	0.125554	1.62215	0.375042	0.501353	0.913163	S	746	___2	GYPLRRSQSLPTTLLSPVRVVSSVNVRLSPG	P28290	P28290	SSFA2	Sperm-specific antigen 2
1257	psites	tmt	0	1.19374	1.13025	0.148335	1.34923	0.68896	0.938665	0.996956	S	776	___2	KVSDFGLSRFLEDDTSDPTYTSALGGKIPIR	P29323	P29323	EPHB2	Ephrin type-B receptor 2
1258	psites	tmt	0	1.09154	0.844306	0.0920344	0.921593	0.0673924	0.176833	0.834648	S	518	___2	RSSPEQPRPSTSKAVSPPHLDGPPSPRSPVI	P29590	P29590	PML	Protein PML
1259	psites	tmt	0	1.09154	0.844306	0.0920344	0.921593	0.0673924	0.176833	0.834648	S	527	___2	STSKAVSPPHLDGPPSPRSPVIGSEVFLPNS	P29590	P29590	PML	Protein PML
1260	psites	tmt	0	1.09684	0.934499	0.0462696	1.025	0.130736	0.462269	0.902495	S	463	___2	CRRHKQTKKRRILIPSDIESSKSSTRRMKSS	P30414	P30414	NKTR	NK-tumor recognition protein;Putative peptidyl-prolyl cis-trans isomerase
1261	psites	tmt	0	1.12613	1.01095	0.145713	1.13846	0.031447	0.362152	0.874972	S	200	___2	ISNLTKTASESISNLSEAGSIKKGERELKIG	P30622	P30622	CLIP1	CAP-Gly domain-containing linker protein 1
1262	psites	tmt	0	0.833883	1.0074	0.15046	0.840055	0.104386	0.170089	0.834648	S	83	___2	RQKSNSQSDSHDEEVSPTPPNPVVKARRRRG	P31321	P31321	PRKAR1B	cAMP-dependent protein kinase type I-beta regulatory subunit
1263	psites	tmt	0	0.983696	1.05506	0.169346	1.03785	0.0601665	0.9464	0.996956	S	473	___2	MECVDSERRPHFPQFSYSASGTA________	P31749	P31749	AKT1	RAC-alpha serine/threonine-protein kinase
1264	psites	tmt	0	0.82596	1.24557	0.0615461	1.02879	0.0174672	0.0521699	0.834648	S	474	___2	LGLLELDQRTHFPQFSYSASIRE________	P31751	P31751	AKT2	RAC-beta serine/threonine-protein kinase
1265	psites	tmt	0	0.82596	1.24557	0.0615461	1.02879	0.0174672	0.0521699	0.834648	S	478	___2	ELDQRTHFPQFSYSASIRE____________	P31751	P31751	AKT2	RAC-beta serine/threonine-protein kinase
1266	psites	tmt	0	0.794188	1.09186	0.0568525	0.867139	0.0759996	0.00299406	0.723135	S	163	___2	PEVMETQQVQEKYADSPGASSPEQPKRKKGR	P32519	P32519	ELF1	ETS-related transcription factor Elf-1
1267	psites	tmt	0	0.794188	1.09186	0.0568525	0.867139	0.0759996	0.00299406	0.723135	S	167	___2	ETQQVQEKYADSPGASSPEQPKRKKGRKTKP	P32519	P32519	ELF1	ETS-related transcription factor Elf-1
1268	psites	tmt	0	1.08158	0.952753	0.0581171	1.03048	0.0878193	0.190795	0.834648	S	69	___2	FKQKQPSKKKRIIYDSDSESEETLQVKNAKK	P35251	P35251	RFC1	Replication factor C subunit 1
1269	psites	tmt	0	1.08158	0.952753	0.0581171	1.03048	0.0878193	0.190795	0.834648	S	71	___2	QKQPSKKKRIIYDSDSESEETLQVKNAKKPP	P35251	P35251	RFC1	Replication factor C subunit 1
1270	psites	tmt	0	0.671795	1.11873	0.147559	0.751556	0.184436	0.0374947	0.834648	S	358	___2	LLNPEKYKAKSRSPGSPVGEGTGSPPKWQIG	P35611	P35611	ADD1	Alpha-adducin
1271	psites	tmt	0	1.14191	0.884928	0.320646	1.01051	0.0503553	0.567346	0.936012	S	436	___2	FASDGDSGTCSPLRHSFQKQQREKTRWLNSG	P35611	P35611	ADD1	Alpha-adducin
1272	psites	tmt	0	1.1591	0.941944	0.154772	1.09181	0.0606062	0.102519	0.834648	S	22	___2	QCSIKQERISYTPPESPVPSYASSTPLHVPV	P41212	P41212	ETV6	Transcription factor ETV6
1273	psites	tmt	0	1.13313	0.908301	0.154367	1.02922	0.0376822	0.231889	0.845101	S	121	___2	AAEGLEPKYRIQEQESSGEEDSDLSPEEREK	Q6NXS1	Q6NXS1	PPP1R2P3;PPP1R2	Protein phosphatase inhibitor 2-like protein 3;Protein phosphatase inhibitor 2
1274	psites	tmt	0	1.13313	0.908301	0.154367	1.02922	0.0376822	0.231889	0.845101	S	122	___2	AEGLEPKYRIQEQESSGEEDSDLSPEEREKK	Q6NXS1	Q6NXS1	PPP1R2P3;PPP1R2	Protein phosphatase inhibitor 2-like protein 3;Protein phosphatase inhibitor 2
1275	psites	tmt	0	1.01433	1.01534	0.0620227	1.02989	0.0514687	0.730994	0.978776	S	66	___2	PPLPAGTNSKGPPDFSSDEEREPTPVLGSGA	P42166;P42167	P42167	TMPO	Lamina-associated polypeptide 2, isoform alpha;Thymopoietin;Thymopentin;Lamina-associated polypeptide 2, isoforms beta/gamma;Thymopoietin;Thymopentin
1276	psites	tmt	0	1.02445	1.02676	0.059083	1.05186	0.025558	0.460888	0.902495	S	67	___2	PLPAGTNSKGPPDFSSDEEREPTPVLGSGAA	P42166;P42167	P42167	TMPO	Lamina-associated polypeptide 2, isoform alpha;Thymopoietin;Thymopentin;Lamina-associated polypeptide 2, isoforms beta/gamma;Thymopoietin;Thymopentin
1277	psites	tmt	0	0.905653	1.09905	0.0802632	0.995358	0.255357	0.439819	0.897566	S	419	___2	LTAAKEESGGRSRSGSIVELIAGGGSSCSPV	P42858	P42858	HTT	Huntingtin
1278	psites	tmt	0	0.832933	1.12077	0.144807	0.93353	0.417927	0.374762	0.879147	S	432	___2	SGSIVELIAGGGSSCSPVLSRKQKGKVLLGE	P42858	P42858	HTT	Huntingtin
1279	psites	tmt	0	1.02307	0.964927	0.339958	0.987192	0.0309546	0.775327	0.986664	S	598	___2	GIDLLKKDKSRKRSYSPDGKESPSDKKSKTD	P43243	P43243	MATR3	Matrin-3
1280	psites	tmt	0	1.02307	0.964927	0.339958	0.987192	0.0309546	0.775327	0.986664	S	604	___2	KDKSRKRSYSPDGKESPSDKKSKTDGSQKTE	P43243	P43243	MATR3	Matrin-3
1281	psites	tmt	0	0.844832	1.21291	0.16718	1.0247	0.657754	0.490701	0.909478	S	579	___2	GSEIHVEVKAQSLVISPPAPSPRKTPVASDQ	P46013	P46013	MKI67	Antigen KI-67
1282	psites	tmt	0	0.844832	1.21291	0.16718	1.0247	0.657754	0.490701	0.909478	S	584	___2	VEVKAQSLVISPPAPSPRKTPVASDQRRRSC	P46013	P46013	MKI67	Antigen KI-67
1283	psites	tmt	0	0.868408	1.09104	0.132955	0.947468	0.220639	0.295219	0.858718	S	1861	___2	NPTTDEKTTKKILCKSPQSDPADTPTNTKQR	P46013	P46013	MKI67	Antigen KI-67
1284	psites	tmt	0	1.08416	1.0477	0.28852	1.13587	0.070323	0.682364	0.967752	S	729	___2	NKLPKSKQSETVDQNSDSDEMLAILKEVSRM	P46100	P46100	ATRX	Transcriptional regulator ATRX
1285	psites	tmt	0	1.08416	1.0477	0.28852	1.13587	0.070323	0.682364	0.967752	S	731	___2	LPKSKQSETVDQNSDSDEMLAILKEVSRMSH	P46100	P46100	ATRX	Transcriptional regulator ATRX
1286	psites	tmt	0	1.06403	1.02278	0.153055	1.08827	0.126392	0.694324	0.9695	S	1747	___2	LELEVARLQLQGLDLSSRSLLGIDTEDAIQG	P49454	P49454	CENPF	Centromere protein F
1287	psites	tmt	0	1.06403	1.02278	0.153055	1.08827	0.126392	0.694324	0.9695	S	1750	___2	EVARLQLQGLDLSSRSLLGIDTEDAIQGRNE	P49454	P49454	CENPF	Centromere protein F
1288	psites	tmt	0	0.789359	1.25134	0.097739	0.987754	0.113081	0.0520283	0.834648	S	343	___2	RSPSPSFRWPFSGKTSPPCSPANLSRHKAAA	P49585	P49585	PCYT1A	Choline-phosphate cytidylyltransferase A
1289	psites	tmt	0	0.831543	1.21243	0.103042	1.00819	0.0996715	0.0428934	0.834648	S	347	___2	PSFRWPFSGKTSPPCSPANLSRHKAAAYDIS	P49585	P49585	PCYT1A	Choline-phosphate cytidylyltransferase A
1290	psites	tmt	0	0.826628	1.47231	0.363849	1.21705	0.556014	0.584008	0.937722	S	614	___2	PAEILKEGSVLDILKSPGFASPKIDSVAAQP	P49790	P49790	NUP153	Nuclear pore complex protein Nup153
1291	psites	tmt	0	0.826628	1.47231	0.363849	1.21705	0.556014	0.584008	0.937722	S	619	___2	KEGSVLDILKSPGFASPKIDSVAAQPTATSP	P49790	P49790	NUP153	Nuclear pore complex protein Nup153
1292	psites	tmt	0	1.05543	0.900624	0.182291	0.950547	0.0639932	0.609033	0.948	S	338	___2	ADAKRIPSIVSSPLNSPLDRSGIDITDFQAK	P49790	P49790	NUP153	Nuclear pore complex protein Nup153
1293	psites	tmt	0	0.810046	1.18564	0.145728	0.960424	0.243703	0.152233	0.834648	S	77	___2	SSEPPAAPADRLRAESPSPPRLLAAHCALLP	P50219	P50219	MNX1	Motor neuron and pancreas homeobox protein 1
1294	psites	tmt	0	0.810046	1.18564	0.145728	0.960424	0.243703	0.152233	0.834648	S	79	___2	EPPAAPADRLRAESPSPPRLLAAHCALLPKP	P50219	P50219	MNX1	Motor neuron and pancreas homeobox protein 1
1295	psites	tmt	0	1.12402	0.984762	0.131575	1.1069	0.202335	0.461992	0.902495	S	601	___2	NRSRRRRNRGNRTDGSISGDRQPVTVADYIS	P51116	P51116	FXR2	Fragile X mental retardation syndrome-related protein 2
1296	psites	tmt	0	1.04342	1.00255	0.111329	1.04608	0.20995	0.788568	0.986664	S	603	___2	SRRRRNRGNRTDGSISGDRQPVTVADYISRA	P51116	P51116	FXR2	Fragile X mental retardation syndrome-related protein 2
1297	psites	tmt	0	1.14534	0.998775	0.0628529	1.14393	0.220381	0.525741	0.930181	S	369	___2	TFYFDPEFTAKTPKDSPGIPPSANAHQLFRG	P51812	P51812	RPS6KA3	Ribosomal protein S6 kinase alpha-3
1298	psites	tmt	0	1.14534	0.998775	0.0628529	1.14393	0.220381	0.525741	0.930181	S	375	___2	EFTAKTPKDSPGIPPSANAHQLFRGFSFVAI	P51812	P51812	RPS6KA3	Ribosomal protein S6 kinase alpha-3
1299	psites	tmt	0	1.02224	0.866746	0.155672	0.886025	0.240498	0.953578	0.998019	S	206	___2	DSAPERELSPLISLPSPVPPLSPIHSNQQTL	P51825	P51825	AFF1	AF4/FMR2 family member 1
1300	psites	tmt	0	0.668427	1.19295	0.176292	0.797399	0.108833	0.113819	0.834648	S	132	___2	EAAEGDGDKKGNAEGSSDEEGKLVIDEPAKE	P51858	P51858	HDGF	Hepatoma-derived growth factor
1301	psites	tmt	0	0.668427	1.19295	0.176292	0.797399	0.108833	0.113819	0.834648	S	133	___2	AAEGDGDKKGNAEGSSDEEGKLVIDEPAKEK	P51858	P51858	HDGF	Hepatoma-derived growth factor
1302	psites	tmt	0	1.23181	0.872825	0.0429991	1.07516	0.0822374	0.0173332	0.795451	S	179	___2	LGDSAPTLHLNKGTPSQSPVVGRSQGQQQEK	P52594	P52594	AGFG1	Arf-GAP domain and FG repeat-containing protein 1
1303	psites	tmt	0	1.0074	1.05957	0.122665	1.06741	0.181666	0.997419	1	S	63	___2	AAWSEAGPGPRPLARSASPPKAKNLNGGLRR	P52701	P52701	MSH6	DNA mismatch repair protein Msh6
1304	psites	tmt	0	1.0074	1.05957	0.122665	1.06741	0.181666	0.997419	1	S	65	___2	WSEAGPGPRPLARSASPPKAKNLNGGLRRSV	P52701	P52701	MSH6	DNA mismatch repair protein Msh6
1305	psites	tmt	0	1.50051	0.847804	0.293175	1.27213	0.650425	0.626497	0.948	S	623	___2	SNLFSPVNRDSENLASPSEYPENGERFSFLS	P52948	P52948	NUP98	Nuclear pore complex protein Nup98-Nup96;Nuclear pore complex protein Nup98;Nuclear pore complex protein Nup96
1306	psites	tmt	0	1.84158	0.748487	0.156893	1.3784	0.490527	0.153874	0.834648	S	612	___2	IKKLVLKNLNNSNLFSPVNRDSENLASPSEY	P52948	P52948	NUP98	Nuclear pore complex protein Nup98-Nup96;Nuclear pore complex protein Nup98;Nuclear pore complex protein Nup96
1307	psites	tmt	0	0.926876	1.10487	0.0748817	1.02407	0.185034	0.424579	0.896798	S	148	___2	KSYLLPPQPVKQFLISPPASPPVGWKQSEDA	Q9UKA8	Q9UKA8	RCAN3;RCAN1	Calcipressin-3;Calcipressin-1
1308	psites	tmt	0	0.926876	1.10487	0.0748817	1.02407	0.185034	0.424579	0.896798	S	152	___2	LPPQPVKQFLISPPASPPVGWKQSEDAMPVI	Q9UKA8	Q9UKA8	RCAN3;RCAN1	Calcipressin-3;Calcipressin-1
1309	psites	tmt	0	1.04622	0.916511	0.124725	0.958876	0.0778634	0.601972	0.941922	S	661	___2	PGAYKTATPPGYKPGSPPSFRTGTPPGYRGT	P54259	P54259	ATN1	Atrophin-1
1310	psites	tmt	0	1.17484	0.960259	0.106163	1.12815	0.222337	0.333344	0.866244	S	389	___2	KAEPFIKWLKEAEEESSGGEEEDEDENIEVV	P55010	P55010	EIF5	Eukaryotic translation initiation factor 5
1311	psites	tmt	0	1.17484	0.960259	0.106163	1.12815	0.222337	0.333344	0.866244	S	390	___2	AEPFIKWLKEAEEESSGGEEEDEDENIEVVY	P55010	P55010	EIF5	Eukaryotic translation initiation factor 5
1312	psites	tmt	0	1.06599	0.929689	0.0800961	0.99104	0.0275565	0.1836	0.834648	S	116	___2	LARHRKIVEPEVVGESDSEVEGDAWRMERED	P55081	P55081	MFAP1	Microfibrillar-associated protein 1
1313	psites	tmt	0	1.06599	0.929689	0.0800961	0.99104	0.0275565	0.1836	0.834648	S	118	___2	RHRKIVEPEVVGESDSEVEGDAWRMEREDSS	P55081	P55081	MFAP1	Microfibrillar-associated protein 1
1314	psites	tmt	0	0.95192	0.995494	0.0787797	0.947631	0.159297	0.55754	0.936012	S	52	___2	KRYVSGKRPDYAPMESSDEEDEEFQFIKKAK	P55081	P55081	MFAP1	Microfibrillar-associated protein 1
1315	psites	tmt	0	0.95192	0.995494	0.0787797	0.947631	0.159297	0.55754	0.936012	S	53	___2	RYVSGKRPDYAPMESSDEEDEEFQFIKKAKE	P55081	P55081	MFAP1	Microfibrillar-associated protein 1
1316	psites	tmt	0	0.777212	1.12295	0.205367	0.872769	0.130087	0.291308	0.858718	S	1182	___2	RADHRSSPNVANQPPSPGGKSAYASGTTAKI	P55196	P55196	MLLT4	Afadin
1317	psites	tmt	0	0.955476	0.926627	0.0699939	0.885369	0.0757367	0.48939	0.90942	S	92	___2	NSPSSLKFPSSHRRASPGLSMPSSSPPIKKY	P57682	P57682	KLF3	Krueppel-like factor 3
1318	psites	tmt	0	0.988413	1.07654	0.0223615	1.06407	0.0316393	0.709132	0.972075	S	494	___2	EQEESSPSHDRSRTVSASSTGDLPKAKTRAA	P78362	P78362	SRPK2	SRSF protein kinase 2;SRSF protein kinase 2 N-terminal;SRSF protein kinase 2 C-terminal
1319	psites	tmt	0	0.971057	1.06648	0.136498	1.03561	0.0473234	0.798266	0.986664	S	416	___2	GVSCFRTPFGPLSSRSAPASPTHPGLMSPRS	P85037	P85037	FOXK1	Forkhead box protein K1
1320	psites	tmt	0	0.912395	1.04826	0.126666	0.956431	0.0766256	0.283934	0.855969	S	420	___2	FRTPFGPLSSRSAPASPTHPGLMSPRSGGLQ	P85037	P85037	FOXK1	Forkhead box protein K1
1321	psites	tmt	0	0.904198	1.04423	0.180064	0.944191	0.133544	0.438401	0.897566	S	428	___2	SSRSAPASPTHPGLMSPRSGGLQTPECLSRE	P85037	P85037	FOXK1	Forkhead box protein K1
1322	psites	tmt	0	0.935584	1.12032	0.0558618	1.04815	0.22663	0.58563	0.937985	S	441	___2	LMSPRSGGLQTPECLSREGSPIPHDPEFGSK	P85037	P85037	FOXK1	Forkhead box protein K1
1323	psites	tmt	0	0.935584	1.12032	0.0558618	1.04815	0.22663	0.58563	0.937985	S	445	___2	RSGGLQTPECLSREGSPIPHDPEFGSKLASV	P85037	P85037	FOXK1	Forkhead box protein K1
1324	psites	tmt	0	1.00904	1.1044	0.079284	1.11438	0.0390494	0.81434	0.986664	S	350	___2	DARQERVEVLPQARASWESLDEEWRAPQAGS	Q00587	Q00587	CDC42EP1	Cdc42 effector protein 1
1325	psites	tmt	0	1.00904	1.1044	0.079284	1.11438	0.0390494	0.81434	0.986664	S	353	___2	QERVEVLPQARASWESLDEEWRAPQAGSRTP	Q00587	Q00587	CDC42EP1	Cdc42 effector protein 1
1326	psites	tmt	0	0.920702	1.15423	0.257321	1.0627	0.0957941	0.670683	0.960786	S	363	___2	LTDARGHTDTEGRPPSPPPTSTPEKCLSVAC	Q00613	Q00613	HSF1	Heat shock factor protein 1
1327	psites	tmt	0	0.941121	0.994395	0.120796	0.935846	0.262153	0.59676	0.941922	S	303	___2	PLSSSPLVRVKEEPPSPPQSPRVEEASPGRP	Q00613	Q00613	HSF1	Heat shock factor protein 1
1328	psites	tmt	0	0.941121	0.994395	0.120796	0.935846	0.262153	0.59676	0.941922	S	307	___2	SPLVRVKEEPPSPPQSPRVEEASPGRPSSVD	Q00613	Q00613	HSF1	Heat shock factor protein 1
1329	psites	tmt	0	0.988963	1.02252	0.112347	1.01123	0.134857	0.884108	0.986664	S	2165	___2	MVNGATEQRTSSKESSPIPSPTSDRKAKTAL	Q01082	Q01082	SPTBN1	Spectrin beta chain, non-erythrocytic 1
1330	psites	tmt	0	0.995104	1.05017	0.205577	1.04503	0.0412521	0.926825	0.992252	S	2169	___2	ATEQRTSSKESSPIPSPTSDRKAKTALPAQS	Q01082	Q01082	SPTBN1	Spectrin beta chain, non-erythrocytic 1
1331	psites	tmt	0	1.00113	0.909783	0.0439485	0.910814	0.144785	0.975941	1	S	1023	___2	GANSVDSRVQRPKEESSEDENEVSNILRSGR	Q01804	Q01804	OTUD4	OTU domain-containing protein 4
1332	psites	tmt	0	1.00113	0.909783	0.0439485	0.910814	0.144785	0.975941	1	S	1024	___2	ANSVDSRVQRPKEESSEDENEVSNILRSGRS	Q01804	Q01804	OTUD4	OTU domain-containing protein 4
1333	psites	tmt	0	1.15978	0.935286	0.0468138	1.08473	0.0710075	0.0382719	0.834648	S	633	___2	PQTGPRLPPRQPTVASPAESDEENRQKTRPR	Q01826	Q01826	SATB1	DNA-binding protein SATB1
1334	psites	tmt	0	1.15978	0.935286	0.0468138	1.08473	0.0710075	0.0382719	0.834648	S	637	___2	PRLPPRQPTVASPAESDEENRQKTRPRTKIS	Q01826	Q01826	SATB1	DNA-binding protein SATB1
1335	psites	tmt	0	1.91809	0.763537	0.501243	1.46453	0.163644	0.208281	0.834648	S	883	___2	KSEAAAPHTDAGGGLSSDEEEGTSSQAEAAR	Q01831	Q01831	XPC	DNA repair protein complementing XP-C cells
1336	psites	tmt	0	1.91809	0.763537	0.501243	1.46453	0.163644	0.208281	0.834648	S	884	___2	SEAAAPHTDAGGGLSSDEEEGTSSQAEAARI	Q01831	Q01831	XPC	DNA repair protein complementing XP-C cells
1337	psites	tmt	0	1.08307	1.06807	0.0617351	1.1568	0.0576482	0.180867	0.834648	S	1581	___2	KTTSKKPKKTSFDQDSDVDIFPSDFPTEPPS	Q02880	Q02880	TOP2B	DNA topoisomerase 2-beta
1338	psites	tmt	0	1.10759	1.0643	0.0679202	1.17881	0.0832194	0.179453	0.834648	S	1588	___2	KKTSFDQDSDVDIFPSDFPTEPPSLPRTGRA	Q02880	Q02880	TOP2B	DNA topoisomerase 2-beta
1339	psites	tmt	0	1.06078	0.950769	0.0351132	1.00855	0.0432928	0.0825315	0.834648	S	1522	___2	PKRAPKQKKVVEAVNSDSDSEFGIPKKTTTP	Q02880	Q02880	TOP2B	DNA topoisomerase 2-beta
1340	psites	tmt	0	1.06334	0.946011	0.0335871	1.00593	0.0389161	0.05724	0.834648	S	1524	___2	RAPKQKKVVEAVNSDSDSEFGIPKKTTTPKG	Q02880	Q02880	TOP2B	DNA topoisomerase 2-beta
1341	psites	tmt	0	1.13815	1.00121	0.216633	1.13953	0.0828854	0.36582	0.874972	S	1461	___2	NLFSFPSYSQKSEDDSAKFDSNEEDSASVFS	Q02880	Q02880	TOP2B	DNA topoisomerase 2-beta
1342	psites	tmt	0	1.10424	0.982556	0.215533	1.08498	0.0769346	0.450653	0.902495	S	1466	___2	PSYSQKSEDDSAKFDSNEEDSASVFSPSFGL	Q02880	Q02880	TOP2B	DNA topoisomerase 2-beta
1343	psites	tmt	0	0.940937	1.01023	0.0776699	0.950563	0.0723844	0.304964	0.858718	S	37	___2	ATPLPGRAGGPATPLSPTRLSRLQEKEELRE	Q03252	Q03252	LMNB2	Lamin-B2
1344	psites	tmt	0	1.09623	0.948902	0.232719	1.04022	0.0819251	0.438319	0.897566	S	429	___2	QKKVPVQEIDDDFFPSSGEEAEAASVGEGGG	Q03468	Q03468	ERCC6	DNA excision repair protein ERCC-6
1345	psites	tmt	0	1.09623	0.948902	0.232719	1.04022	0.0819251	0.438319	0.897566	S	430	___2	KKVPVQEIDDDFFPSSGEEAEAASVGEGGGG	Q03468	Q03468	ERCC6	DNA excision repair protein ERCC-6
1346	psites	tmt	0	0.968501	1.16846	0.0946422	1.13165	0.305511	0.836886	0.986664	S	1194	___2	TPATKRSFSKEVEERSRERPSQPEGLRKAAS	Q04637	Q04637	EIF4G1	Eukaryotic translation initiation factor 4 gamma 1
1347	psites	tmt	0	1.17267	0.931528	0.0717951	1.09238	0.314602	0.498198	0.910559	S	571	___2	SDINYQTRKTVSLTPSPTTQVETPDLVDHDN	Q05209	Q05209	PTPN12	Tyrosine-protein phosphatase non-receptor type 12
1348	psites	tmt	0	1.10518	0.869484	0.115742	0.960934	0.109563	0.255608	0.855001	S	664	___2	KNLIDSMDQSAFAGFSFVNPKFEHLLED___	Q05655	Q05655	PRKCD	Protein kinase C delta type;Protein kinase C delta type regulatory subunit;Protein kinase C delta type catalytic subunit
1349	psites	tmt	0	0.98482	0.956001	0.0923856	0.941488	0.0840376	0.816535	0.986664	S	199	___2	EGETAYIRVKVDGPRSPSYGRSRSRSRSRSR	Q07955	Q07955	SRSF1	Serine/arginine-rich splicing factor 1
1350	psites	tmt	0	0.98482	0.956001	0.0923856	0.941488	0.0840376	0.816535	0.986664	S	201	___2	ETAYIRVKVDGPRSPSYGRSRSRSRSRSRSR	Q07955	Q07955	SRSF1	Serine/arginine-rich splicing factor 1
1351	psites	tmt	0	1.11512	1.04031	0.0385891	1.16007	0.0951918	0.08362	0.834648	S	984	___2	YRSNSPLPSIQLQPQSPSASKKHQVVQDLPP	Q08174	Q08174	PCDH1	Protocadherin-1
1352	psites	tmt	0	0.925861	1.16639	0.13133	1.07992	0.0530334	0.4161	0.896798	S	256	___2	KITGKLQKEGALSRVSDESLSKVQEAESPVF	Q08357	Q08357	SLC20A2	Sodium-dependent phosphate transporter 2
1353	psites	tmt	0	0.925861	1.16639	0.13133	1.07992	0.0530334	0.4161	0.896798	S	259	___2	GKLQKEGALSRVSDESLSKVQEAESPVFKEL	Q08357	Q08357	SLC20A2	Sodium-dependent phosphate transporter 2
1354	psites	tmt	0	1.17472	0.913943	0.177754	1.07363	0.187274	0.272794	0.855969	S	743	___2	PDNDVTEGQRAGEPNSPDAEEANSPDVTAGC	Q08J23	Q08J23	NSUN2	tRNA (cytosine(34)-C(5))-methyltransferase
1355	psites	tmt	0	1.17472	0.913943	0.177754	1.07363	0.187274	0.272794	0.855969	S	751	___2	QRAGEPNSPDAEEANSPDVTAGCDPAGVHPP	Q08J23	Q08J23	NSUN2	tRNA (cytosine(34)-C(5))-methyltransferase
1356	psites	tmt	0	1.10459	0.911129	0.073469	1.00643	0.052952	0.0678438	0.834648	S	5749	___2	ASISGSKGDLKSSKASLGSLEGEAEAEASSP	Q09666	Q09666	AHNAK	Neuroblast differentiation-associated protein AHNAK
1357	psites	tmt	0	1.17706	0.877984	0.126019	1.03344	0.0361953	0.0362694	0.834648	S	5752	___2	SGSKGDLKSSKASLGSLEGEAEAEASSPKGK	Q09666	Q09666	AHNAK	Neuroblast differentiation-associated protein AHNAK
1358	psites	tmt	0	1.26626	0.900411	0.346548	1.14015	0.135937	0.430903	0.897566	S	5763	___2	ASLGSLEGEAEAEASSPKGKFSLFKSKKPRH	Q09666	Q09666	AHNAK	Neuroblast differentiation-associated protein AHNAK
1359	psites	tmt	0	1.0397	1.00566	0.0601913	1.04559	0.214893	0.821444	0.986664	S	5731	___2	KFNFSKPKGKGGVTGSPEASISGSKGDLKSS	Q09666	Q09666	AHNAK	Neuroblast differentiation-associated protein AHNAK
1360	psites	tmt	0	1.0397	1.00566	0.0601913	1.04559	0.214893	0.821444	0.986664	S	5739	___2	GKGGVTGSPEASISGSKGDLKSSKASLGSLE	Q09666	Q09666	AHNAK	Neuroblast differentiation-associated protein AHNAK
1361	psites	tmt	0	1.09689	0.876375	0.0443135	0.961289	0.221686	0.666799	0.960733	S	210	___2	VDVETQSGKTVIRLPSGSGAASPTGSAVDIR	Q09666	Q09666	AHNAK	Neuroblast differentiation-associated protein AHNAK
1362	psites	tmt	0	1.10097	0.893079	0.055128	0.983254	0.240098	0.562738	0.936012	S	212	___2	VETQSGKTVIRLPSGSGAASPTGSAVDIRAG	Q09666	Q09666	AHNAK	Neuroblast differentiation-associated protein AHNAK
1363	psites	tmt	0	1.01804	0.903334	0.0399623	0.919633	0.160593	0.929373	0.992868	S	216	___2	SGKTVIRLPSGSGAASPTGSAVDIRAGAISA	Q09666	Q09666	AHNAK	Neuroblast differentiation-associated protein AHNAK
1364	psites	tmt	0	1.05023	0.869531	0.110857	0.91321	0.0614719	0.513945	0.926206	S	488	___2	TSGKLSGINEIPRPFSPPVTSNTSPPPAAPL	Q0JRZ9	Q0JRZ9	FCHO2	F-BAR domain only protein 2
1365	psites	tmt	0	1.02514	0.948748	0.203468	0.972598	0.287829	0.95152	0.997347	S	221	___2	DEHIVLEPGDLFPPFSPPPSPRGEVERGPQS	Q12767	Q12767	KIAA0195	Uncharacterized protein KIAA0195
1366	psites	tmt	0	1.02514	0.948748	0.203468	0.972598	0.287829	0.95152	0.997347	S	225	___2	VLEPGDLFPPFSPPPSPRGEVERGPQSPQQH	Q12767	Q12767	KIAA0195	Uncharacterized protein KIAA0195
1367	psites	tmt	0	1.31581	0.918477	0.0113613	1.20854	0.238851	0.267187	0.855969	S	1929	___2	GNDENMSNTWKFLSHSTDSLNKISKVNESTE	Q12802	Q12802	AKAP13	A-kinase anchor protein 13
1368	psites	tmt	0	1.11863	0.947194	0.0656439	1.05956	0.154663	0.325723	0.862234	S	1932	___2	ENMSNTWKFLSHSTDSLNKISKVNESTESLT	Q12802	Q12802	AKAP13	A-kinase anchor protein 13
1369	psites	tmt	0	0.855691	1.12393	0.0266632	0.961735	0.169339	0.312874	0.858718	S	1426	___2	TRETAVPGPLGIEDISPNLSPDDKSFSRVVP	Q12888	Q12888	TP53BP1	Tumor suppressor p53-binding protein 1
1370	psites	tmt	0	0.855691	1.12393	0.0266632	0.961735	0.169339	0.312874	0.858718	S	1430	___2	AVPGPLGIEDISPNLSPDDKSFSRVVPRVPD	Q12888	Q12888	TP53BP1	Tumor suppressor p53-binding protein 1
1371	psites	tmt	0	1.16611	0.98091	0.332052	1.14384	0.288033	0.497049	0.910559	S	1462	___2	TRRTDVGAGALRRSDSPEIPFQAAAGPSDGL	Q12888	Q12888	TP53BP1	Tumor suppressor p53-binding protein 1
1372	psites	tmt	0	0.830213	1.15064	0.146091	0.955277	0.0852503	0.148905	0.834648	S	1758	___2	DKLASRSKLPDGPTGSSEEEEEFLEIPPFNK	Q12888	Q12888	TP53BP1	Tumor suppressor p53-binding protein 1
1373	psites	tmt	0	0.830213	1.15064	0.146091	0.955277	0.0852503	0.148905	0.834648	S	1759	___2	KLASRSKLPDGPTGSSEEEEEFLEIPPFNKQ	Q12888	Q12888	TP53BP1	Tumor suppressor p53-binding protein 1
1374	psites	tmt	0	0.852155	1.14763	0.0689032	0.977961	0.0858657	0.0647709	0.834648	S	1173	___2	KTLFSKAKSYYRRTHSDASDDEAFTTSKTKR	Q13017	Q13017	ARHGAP5	Rho GTPase-activating protein 5
1375	psites	tmt	0	0.852155	1.14763	0.0689032	0.977961	0.0858657	0.0647709	0.834648	S	1176	___2	FSKAKSYYRRTHSDASDDEAFTTSKTKRKGR	Q13017	Q13017	ARHGAP5	Rho GTPase-activating protein 5
1376	psites	tmt	0	0.863868	1.1444	0.0137578	0.988613	0.135385	0.258404	0.855001	S	25	___2	PLELNQHSRFIIGSVSEDNSEDEISNLVKLD	Q13085	Q13085	ACACA	Acetyl-CoA carboxylase 1;Biotin carboxylase
1377	psites	tmt	0	0.863868	1.1444	0.0137578	0.988613	0.135385	0.258404	0.855001	S	29	___2	NQHSRFIIGSVSEDNSEDEISNLVKLDLLEE	Q13085	Q13085	ACACA	Acetyl-CoA carboxylase 1;Biotin carboxylase
1378	psites	tmt	0	0.924073	1.00126	0.212522	0.92524	0.26131	0.757834	0.98551	S	255	___2	VVLQDILAVRPPQIKSLPATPQGKNMTPESE	Q13111	Q13111	CHAF1A	Chromatin assembly factor 1 subunit A
1379	psites	tmt	0	0.951723	1.11432	0.0103841	1.06052	0.0667392	0.400946	0.889074	S	486	___2	LLDFRSIDDEITEAKSGTATPQRSGSVSNYR	Q13131	Q13131	PRKAA1	5'-AMP-activated protein kinase catalytic subunit alpha-1
1380	psites	tmt	0	1.07219	1.15265	0.117194	1.23586	0.230439	0.776644	0.986664	S	93	___2	NSQKAGKEKDGTKRKSLSDSESDDSKSKKKR	Q13185	Q13185	CBX3	Chromobox protein homolog 3
1381	psites	tmt	0	0.979928	1.05776	0.0948151	1.03653	0.386328	0.784318	0.986664	S	95	___2	QKAGKEKDGTKRKSLSDSESDDSKSKKKRDA	Q13185	Q13185	CBX3	Chromobox protein homolog 3
1382	psites	tmt	0	0.790278	1.05807	0.134047	0.836169	0.337934	0.42457	0.896798	S	97	___2	AGKEKDGTKRKSLSDSESDDSKSKKKRDAAD	Q13185	Q13185	CBX3	Chromobox protein homolog 3
1383	psites	tmt	0	0.96171	0.983471	0.0155651	0.945814	0.024726	0.19871	0.834648	S	705	___2	SIQRLVSGLESQRALSPGRESPK________	Q13207	Q13207	TBX2	T-box transcription factor TBX2
1384	psites	tmt	0	0.96171	0.983471	0.0155651	0.945814	0.024726	0.19871	0.834648	S	710	___2	VSGLESQRALSPGRESPK_____________	Q13207	Q13207	TBX2	T-box transcription factor TBX2
1385	psites	tmt	0	1.04854	0.997863	0.0997797	1.0463	0.189654	0.728075	0.977557	S	211	___2	RSGSRGRDSPYQSRGSPHYFSPFRPY_____	Q13242	Q13242	SRSF9	Serine/arginine-rich splicing factor 9
1386	psites	tmt	0	1.04854	0.997863	0.0997797	1.0463	0.189654	0.728075	0.977557	S	216	___2	GRDSPYQSRGSPHYFSPFRPY__________	Q13242	Q13242	SRSF9	Serine/arginine-rich splicing factor 9
1387	psites	tmt	0	0.95502	1.0344	0.0858007	0.987875	0.0860677	0.47801	0.90494	S	314	___2	SRSNSPLPVPPSKARSVSPPPKRATSRSRSR	Q13247	Q13247	SRSF6	Serine/arginine-rich splicing factor 6
1388	psites	tmt	0	0.95502	1.0344	0.0858007	0.987875	0.0860677	0.47801	0.90494	S	316	___2	SNSPLPVPPSKARSVSPPPKRATSRSRSRSR	Q13247	Q13247	SRSF6	Serine/arginine-rich splicing factor 6
1389	psites	tmt	0	0.698819	1.02689	0.242128	0.717613	0.41749	0.247962	0.855001	S	594	___2	MALAEGPGAEGPRLASPSGSTSSGLEVVAPE	Q13263	Q13263	TRIM28	Transcription intermediary factor 1-beta
1390	psites	tmt	0	0.676384	1.26927	0.256389	0.858512	0.342893	0.128479	0.834648	S	12	___2	____MGGCAGSRRRFSDSEGEETVPEPRLPL	Q13286	Q13286	CLN3	Battenin
1391	psites	tmt	0	0.676384	1.26927	0.256389	0.858512	0.342893	0.128479	0.834648	S	14	___2	__MGGCAGSRRRFSDSEGEETVPEPRLPLLD	Q13286	Q13286	CLN3	Battenin
1392	psites	tmt	0	0.764815	1.10728	0.0854529	0.84686	0.352976	0.107771	0.834648	S	544	___2	EHDHSKSKEKDRRAQSRSRECDITKGKHSYN	Q13427	Q13427	PPIG	Peptidyl-prolyl cis-trans isomerase G
1393	psites	tmt	0	0.764815	1.10728	0.0854529	0.84686	0.352976	0.107771	0.834648	S	546	___2	DHSKSKEKDRRAQSRSRECDITKGKHSYNSR	Q13427	Q13427	PPIG	Peptidyl-prolyl cis-trans isomerase G
1394	psites	tmt	0	0.99726	1.03132	0.0215281	1.02849	0.0588345	0.906508	0.989979	S	356	___2	YRTPSRSRSRDRFRRSETPPHWRQEMQRAQR	Q13427	Q13427	PPIG	Peptidyl-prolyl cis-trans isomerase G
1395	psites	tmt	0	1.1435	1.00031	0.123927	1.14386	0.150635	0.211285	0.834648	S	307	___2	EEEEMETDARSSLGQSASETEEDTVSVSKKE	Q13435	Q13435	SF3B2	Splicing factor 3B subunit 2
1396	psites	tmt	0	1.1435	1.00031	0.123927	1.14386	0.150635	0.211285	0.834648	S	309	___2	EEMETDARSSLGQSASETEEDTVSVSKKEKN	Q13435	Q13435	SF3B2	Splicing factor 3B subunit 2
1397	psites	tmt	0	1.03765	1.05076	0.0559711	1.09031	0.0770788	0.491144	0.909478	S	60	___2	DGAAGDPKKEKKSLDSDESEDEEDDYQQKRK	Q13442	Q13442	PDAP1	28 kDa heat- and acid-stable phosphoprotein
1398	psites	tmt	0	1.03765	1.05076	0.0559711	1.09031	0.0770788	0.491144	0.909478	S	63	___2	AGDPKKEKKSLDSDESEDEEDDYQQKRKGVE	Q13442	Q13442	PDAP1	28 kDa heat- and acid-stable phosphoprotein
1399	psites	tmt	0	1.10297	1.15066	0.956869	1.26915	0.602248	0.777098	0.986664	S	1105	___2	LRAKLLDLSDSTSVASFPSADETDGNLPESR	Q13464	Q13464	ROCK1	Rho-associated protein kinase 1
1400	psites	tmt	0	1.11482	0.955488	0.141277	1.06519	0.221808	0.642839	0.953702	S	502	___2	QRRNMPLERMKGISRSLESVLSLGPRPTGGG	Q13470	Q13470	TNK1	Non-receptor tyrosine-protein kinase TNK1
1401	psites	tmt	0	1.07659	0.946328	0.102047	1.01881	0.215151	0.684072	0.967752	S	431	___2	PRDDILSRRERSKDASPINRWSPTRRRSRSP	Q13523	Q13523	PRPF4B	Serine/threonine-protein kinase PRP4 homolog
1402	psites	tmt	0	1.07659	0.946328	0.102047	1.01881	0.215151	0.684072	0.967752	S	437	___2	SRRERSKDASPINRWSPTRRRSRSPIRRRSR	Q13523	Q13523	PRPF4B	Serine/threonine-protein kinase PRP4 homolog
1403	psites	tmt	0	0.924945	1.02937	0.00675597	0.952112	0.117313	0.431149	0.897566	S	87	___2	KHKHKKHKRKEIIDASDKEGMSPAKRTKLDD	Q13523	Q13523	PRPF4B	Serine/threonine-protein kinase PRP4 homolog
1404	psites	tmt	0	0.924945	1.02937	0.00675597	0.952112	0.117313	0.431149	0.897566	S	93	___2	HKRKEIIDASDKEGMSPAKRTKLDDLALLED	Q13523	Q13523	PRPF4B	Serine/threonine-protein kinase PRP4 homolog
1405	psites	tmt	0	0.707173	1.07579	0.0712702	0.760767	0.10085	0.00856387	0.723135	S	239	___2	KSPSKRSKSQDQARKSKSPTLRRRSQEKIGK	Q13523	Q13523	PRPF4B	Serine/threonine-protein kinase PRP4 homolog
1406	psites	tmt	0	0.707173	1.07579	0.0712702	0.760767	0.10085	0.00856387	0.723135	S	241	___2	PSKRSKSQDQARKSKSPTLRRRSQEKIGKAR	Q13523	Q13523	PRPF4B	Serine/threonine-protein kinase PRP4 homolog
1407	psites	tmt	0	0.964025	1.00536	0.160943	0.969195	0.153143	0.772848	0.986664	S	354	___2	NRSPSRRPGRSPKRRSLSPKPRDKSRRSRSP	Q13523	Q13523	PRPF4B	Serine/threonine-protein kinase PRP4 homolog
1408	psites	tmt	0	0.964025	1.00536	0.160943	0.969195	0.153143	0.772848	0.986664	S	356	___2	SPSRRPGRSPKRRSLSPKPRDKSRRSRSPLL	Q13523	Q13523	PRPF4B	Serine/threonine-protein kinase PRP4 homolog
1409	psites	tmt	0	0.751115	1.18193	0.264614	0.887765	0.0806384	0.170218	0.834648	S	580	___2	SEPSSPQSSTRTRSPSPDDILERVAADVKEY	Q13523	Q13523	PRPF4B	Serine/threonine-protein kinase PRP4 homolog
1410	psites	tmt	0	0.986318	0.965399	0.0313119	0.952191	0.0665169	0.690321	0.9695	S	142	___2	GKVQSGMGLILQGYESGSEEEGEIHEKARNG	Q13523	Q13523	PRPF4B	Serine/threonine-protein kinase PRP4 homolog
1411	psites	tmt	0	0.986318	0.965399	0.0313119	0.952191	0.0665169	0.690321	0.9695	S	144	___2	VQSGMGLILQGYESGSEEEGEIHEKARNGNR	Q13523	Q13523	PRPF4B	Serine/threonine-protein kinase PRP4 homolog
1412	psites	tmt	0	1.02316	1.00736	0.066094	1.03069	0.244911	0.969057	1	S	421	___2	SICSSDKRIACEEEFSDSEEEGEGGRKNSSN	Q13547	Q13547	HDAC1	Histone deacetylase 1
1413	psites	tmt	0	1.02316	1.00736	0.066094	1.03069	0.244911	0.969057	1	S	423	___2	CSSDKRIACEEEFSDSEEEGEGGRKNSSNFK	Q13547	Q13547	HDAC1	Histone deacetylase 1
1414	psites	tmt	0	1.23365	0.95155	0.167728	1.17388	0.625624	0.799467	0.986664	S	315	___2	LKGAILTTMLATRNFSAAKSLLKKPDGVKES	Q13557	Q13557	CAMK2D	Calcium/calmodulin-dependent protein kinase type II subunit delta
1415	psites	tmt	0	1.23365	0.95155	0.167728	1.17388	0.625624	0.799467	0.986664	S	319	___2	ILTTMLATRNFSAAKSLLKKPDGVKESTESS	Q13557	Q13557	CAMK2D	Calcium/calmodulin-dependent protein kinase type II subunit delta
1416	psites	tmt	0	1.04091	0.993493	0.0697176	1.03413	0.0736287	0.451019	0.902495	S	224	___2	PPRFKINKKIPRGPPSPPAPVMHSPSRKMTV	Q13573	Q13573	SNW1	SNW domain-containing protein 1
1417	psites	tmt	0	1.04091	0.993493	0.0697176	1.03413	0.0736287	0.451019	0.902495	S	232	___2	KIPRGPPSPPAPVMHSPSRKMTVKEQQEWKI	Q13573	Q13573	SNW1	SNW domain-containing protein 1
1418	psites	tmt	0	0.990992	0.928007	0.0930396	0.919648	0.173925	0.868575	0.986664	S	437	___2	SRSRHRLSRSRSRHSSISPSTLTLKSSLAAE	Q14004	Q14004	CDK13	Cyclin-dependent kinase 13
1419	psites	tmt	0	0.990992	0.928007	0.0930396	0.919648	0.173925	0.868575	0.986664	S	439	___2	SRHRLSRSRSRHSSISPSTLTLKSSLAAELN	Q14004	Q14004	CDK13	Cyclin-dependent kinase 13
1420	psites	tmt	0	0.981745	0.90202	0.126899	0.885554	0.137012	0.840607	0.986664	S	1054	___2	TIKAPRKDLSLGLDDSRTNTPQGVLPSSQLK	Q14004	Q14004	CDK13	Cyclin-dependent kinase 13
1421	psites	tmt	0	1.04911	1.06406	0.0435854	1.11632	0.16389	0.724124	0.976135	S	605	___2	PLYEQRSTQTRRYPSSISSSPQKDLTQAKNG	Q14157	Q14157	UBAP2L	Ubiquitin-associated protein 2-like
1422	psites	tmt	0	1.00676	0.991465	0.0789052	0.998165	0.19992	0.955221	0.998395	S	608	___2	EQRSTQTRRYPSSISSSPQKDLTQAKNGFSS	Q14157	Q14157	UBAP2L	Ubiquitin-associated protein 2-like
1423	psites	tmt	0	1.33733	0.84814	0.142713	1.13424	0.211712	0.257887	0.855001	S	1348	___2	PEDAPAQPPTPGPAASPEQLSFRERQKYFEL	Q14160	Q14160	SCRIB	Protein scribble homolog
1424	psites	tmt	0	0.739382	1.18661	0.206398	0.877358	0.415073	0.257138	0.855001	S	1541	___2	GRGTRGPLERLAEAPSPAPTPSPTPVEDLGP	Q14160	Q14160	SCRIB	Protein scribble homolog
1425	psites	tmt	0	1.44435	0.895558	0.00135435	1.2935	0.106194	0.0399954	0.834648	S	1566	___2	VEDLGPQTSTSPGRLSPDFAEELRSLEPSPS	Q14160	Q14160	SCRIB	Protein scribble homolog
1426	psites	tmt	0	0.966729	0.951896	0.182228	0.920225	0.290417	0.769735	0.985989	S	209	___2	VISKRLSSSSATLLNSPDRARRLQLSPWESS	Q14244	Q14244	MAP7	Ensconsin
1427	psites	tmt	0	1.18212	0.977394	0.129767	1.1554	0.0945005	0.0896272	0.834648	S	405	___2	KLEEQARAKTQTPPVSPAPQPTEERLPSSPV	Q14247	Q14247	CTTN	Src substrate cortactin
1428	psites	tmt	0	1.1976	0.84243	0.101373	1.0089	0.128152	0.141182	0.834648	S	376	___2	PGAPGLAHLQESQAGSDTDVEEGKAPQAVPL	Q14676	Q14676	MDC1	Mediator of DNA damage checkpoint protein 1
1429	psites	tmt	0	0.840882	1.09296	0.0486235	0.919053	0.228275	0.215309	0.834648	S	402	___2	QAVPLEKSQASMVINSDTDDEEEVSAALTLA	Q14676	Q14676	MDC1	Mediator of DNA damage checkpoint protein 1
1430	psites	tmt	0	0.867201	1.06754	0.10065	0.925768	0.105487	0.0970935	0.834648	S	826	___2	VAQKRRKRRRMLRERSPSPPTIQSKRQTPSP	Q14687	Q14687	GSE1	Genetic suppressor element 1
1431	psites	tmt	0	0.867201	1.06754	0.10065	0.925768	0.105487	0.0970935	0.834648	S	828	___2	QKRRKRRRMLRERSPSPPTIQSKRQTPSPRL	Q14687	Q14687	GSE1	Genetic suppressor element 1
1432	psites	tmt	0	0.842926	1.22374	0.130714	1.03152	0.0356304	0.112124	0.834648	S	265	___2	SPSYYNINQVTLGRRSITSPPSTSTTKRPKS	Q14938	Q14938	NFIX	Nuclear factor 1 X-type
1433	psites	tmt	0	0.796518	1.14149	0.0641892	0.90922	0.152521	0.0781178	0.834648	S	1800	___2	PLESSLDSLGDVFLDSGRKTRSARRRTTQII	Q14980	Q14980	NUMA1	Nuclear mitotic apparatus protein 1
1434	psites	tmt	0	0.917744	1.05908	0.0755796	0.971964	0.264224	0.654883	0.958951	S	566	___2	DENKLHGKPDKTLRFSLCSDNLEGISEGPSN	Q14C86	Q14C86	GAPVD1	GTPase-activating protein and VPS9 domain-containing protein 1
1435	psites	tmt	0	0.917744	1.05908	0.0755796	0.971964	0.264224	0.654883	0.958951	S	569	___2	KLHGKPDKTLRFSLCSDNLEGISEGPSNRSN	Q14C86	Q14C86	GAPVD1	GTPase-activating protein and VPS9 domain-containing protein 1
1436	psites	tmt	0	1.69117	0.859467	0.139314	1.4535	0.130753	0.0604213	0.834648	S	4386	___2	DMLSGNAGGFRSRSSSVGSSSSYPISPAVSR	Q15149	Q15149	PLEC	Plectin
1437	psites	tmt	0	1.27237	0.975929	0.0460751	1.24175	0.39422	0.55773	0.936012	S	4396	___2	RSRSSSVGSSSSYPISPAVSRTQLASWSDPT	Q15149	Q15149	PLEC	Plectin
1438	psites	tmt	0	1.09393	0.902242	0.0857977	0.986993	0.261156	0.713099	0.972472	S	65	___2	KKFGVESDKRVTNDISPESSPGVGRRRTKTP	Q15154	Q15154	PCM1	Pericentriolar material 1 protein
1439	psites	tmt	0	1.07113	0.964292	0.120929	1.03289	0.432698	0.949257	0.996956	S	155	___2	KSKPPKRDEKERKRRSPSPKPTKVHIGRLTR	Q15287	Q15287	RNPS1	RNA-binding protein with serine-rich domain 1
1440	psites	tmt	0	1.07113	0.964292	0.120929	1.03289	0.432698	0.949257	0.996956	S	157	___2	KPPKRDEKERKRRSPSPKPTKVHIGRLTRNV	Q15287	Q15287	RNPS1	RNA-binding protein with serine-rich domain 1
1441	psites	tmt	0	0.741055	1.04576	0.112879	0.774962	0.27952	0.280032	0.855969	S	48	___2	ISPTKFPGLYRTGEPSPPHDILHEPPDVVSD	Q15311	Q15311	RALBP1	RalA-binding protein 1
1442	psites	tmt	0	0.741055	1.04576	0.112879	0.774962	0.27952	0.280032	0.855969	S	62	___2	PSPPHDILHEPPDVVSDDEKDHGKKKGKFKK	Q15311	Q15311	RALBP1	RalA-binding protein 1
1443	psites	tmt	0	1.14845	1.06669	0.272759	1.22505	0.159452	0.572524	0.936012	S	642	___2	SVSSEGPSQRLGTPKSVNKAVSQSRNEMGIP	Q15398	Q15398	DLGAP5	Disks large-associated protein 5
1444	psites	tmt	0	1.309	1.09353	0.057927	1.43143	0.174888	0.182847	0.834648	S	363	___2	TFYFDTEFTSRTPKDSPGIPPSAGAHQLFRG	Q15418	Q15418	RPS6KA1	Ribosomal protein S6 kinase alpha-1
1445	psites	tmt	0	1.309	1.09353	0.057927	1.43143	0.174888	0.182847	0.834648	S	369	___2	EFTSRTPKDSPGIPPSAGAHQLFRGFSFVAT	Q15418	Q15418	RPS6KA1	Ribosomal protein S6 kinase alpha-1
1446	psites	tmt	0	1.35499	0.872096	0.0240955	1.18168	0.15868	0.120661	0.834648	S	437	___2	PETLVQPGTPARRCRSLPSSPELPRRMETAL	Q15569	Q15569	TESK1	Dual specificity testis-specific protein kinase 1
1447	psites	tmt	0	1.10938	0.971839	0.0424561	1.07814	0.105308	0.130001	0.834648	S	80	___2	LRTGDLGIPPNPEDRSPSPEPIYNSEGKRLN	Q15637	Q15637	SF1	Splicing factor 1
1448	psites	tmt	0	1.10938	0.971839	0.0424561	1.07814	0.105308	0.130001	0.834648	S	82	___2	TGDLGIPPNPEDRSPSPEPIYNSEGKRLNTR	Q15637	Q15637	SF1	Splicing factor 1
1449	psites	tmt	0	0.937686	1.19554	0.103843	1.12104	0.115122	0.614213	0.948	S	1479	___2	ESESGSSIAEKSYQNSPSSDDGIRPLPEYST	Q15648	Q15648	MED1	Mediator of RNA polymerase II transcription subunit 1
1450	psites	tmt	0	0.977773	1.12745	0.0349493	1.10239	0.180506	0.729348	0.977557	S	240	___2	EAEKRILQEKLDQPVSAPPSPRDISMEIDSP	Q16204	Q16204	CCDC6	Coiled-coil domain-containing protein 6
1451	psites	tmt	0	0.977773	1.12745	0.0349493	1.10239	0.180506	0.729348	0.977557	S	244	___2	RILQEKLDQPVSAPPSPRDISMEIDSPENMM	Q16204	Q16204	CCDC6	Coiled-coil domain-containing protein 6
1452	psites	tmt	0	0.92511	1.04336	0.0310837	0.965222	0.0381712	0.15449	0.834648	S	533	___2	LLRRLIPNATGTGTFSPGASPGSEARTTGDI	Q16512	Q16512	PKN1	Serine/threonine-protein kinase N1
1453	psites	tmt	0	0.92511	1.04336	0.0310837	0.965222	0.0381712	0.15449	0.834648	S	537	___2	LIPNATGTGTFSPGASPGSEARTTGDISVEK	Q16512	Q16512	PKN1	Serine/threonine-protein kinase N1
1454	psites	tmt	0	0.950324	0.802894	0.0140656	0.763009	0.132249	0.61704	0.948	S	51	___2	AVVKIPGTPGAGGRLSPENNQVLTKKKLQDL	Q16514	Q16514	TAF12	Transcription initiation factor TFIID subunit 12
1455	psites	tmt	0	1.02303	0.969932	0.0846836	0.992265	0.111686	0.774986	0.986664	S	789	___2	SRIDPWSFVSAGPRPSPLPSPQPAPRRAPWT	Q16584	Q16584	MAP3K11	Mitogen-activated protein kinase kinase kinase 11
1456	psites	tmt	0	1.02303	0.969932	0.0846836	0.992265	0.111686	0.774986	0.986664	S	793	___2	PWSFVSAGPRPSPLPSPQPAPRRAPWTLFPD	Q16584	Q16584	MAP3K11	Mitogen-activated protein kinase kinase kinase 11
1457	psites	tmt	0	1.00862	1.04956	0.0524101	1.05861	0.111795	0.93342	0.994674	S	28	___2	PEQEDSVLFRRGTGQSDDSDIWDDTALIKAY	Q16637	Q16637	SMN1	Survival motor neuron protein
1458	psites	tmt	0	1.04077	1.03449	0.0597838	1.07666	0.108858	0.560272	0.936012	S	31	___2	EDSVLFRRGTGQSDDSDIWDDTALIKAYDKA	Q16637	Q16637	SMN1	Survival motor neuron protein
1459	psites	tmt	0	1.01428	1.01195	0.0650134	1.0264	0.0834187	0.873597	0.986664	S	42	___2	TRYSVLNNDDYFADVSPLRATSPSKSVAHGQ	Q1ED39	Q1ED39	KNOP1	Lysine-rich nucleolar protein 1
1460	psites	tmt	0	0.957984	1.13211	0.115125	1.08454	0.0957945	0.665365	0.960733	S	1147	___2	KDPTSLLGVLQAEADSTSEGLEDAVHSRGAR	Q27J81	Q27J81	INF2	Inverted formin-2
1461	psites	tmt	0	0.957984	1.13211	0.115125	1.08454	0.0957945	0.665365	0.960733	S	1149	___2	PTSLLGVLQAEADSTSEGLEDAVHSRGARPP	Q27J81	Q27J81	INF2	Inverted formin-2
1462	psites	tmt	0	1.12121	0.940979	0.0808648	1.05503	0.0953571	0.114458	0.834648	S	624	___2	PAVQGQKVGSLTPPSSPKTQRAGHRRILSDV	Q2M2I8	Q2M2I8	AAK1	AP2-associated protein kinase 1
1463	psites	tmt	0	0.960949	0.925739	0.224631	0.889588	0.0321559	0.881467	0.986664	S	373	___2	DKSHSNSSTLSDRRLSNSSLCSIEEEHRMVY	Q2PPJ7	Q2PPJ7	RALGAPA2	Ral GTPase-activating protein subunit alpha-2
1464	psites	tmt	0	1.2626	0.819767	0.0708529	1.03504	0.171101	0.226402	0.835963	S	375	___2	SHSNSSTLSDRRLSNSSLCSIEEEHRMVYEM	Q2PPJ7	Q2PPJ7	RALGAPA2	Ral GTPase-activating protein subunit alpha-2
1465	psites	tmt	0	1.04965	0.96681	0.155012	1.01481	0.202699	0.830577	0.986664	S	376	___2	HSNSSTLSDRRLSNSSLCSIEEEHRMVYEMV	Q2PPJ7	Q2PPJ7	RALGAPA2	Ral GTPase-activating protein subunit alpha-2
1466	psites	tmt	0	1.07607	0.937033	0.102468	1.00831	0.0647199	0.349119	0.874972	S	2079	___2	MSSVETRTLIKSEPVSPKNGVLPQATGDQKS	Q3L8U1	Q3L8U1	CHD9	Chromodomain-helicase-DNA-binding protein 9
1467	psites	tmt	0	0.965001	1.0814	0.00783713	1.04355	0.136947	0.570629	0.936012	S	254	___2	PLNEEGSEKRLLGENSVPPSPSREQTSTAIV	Q3YBM2	Q3YBM2	TMEM176B	Transmembrane protein 176B
1468	psites	tmt	0	1.05348	1.16222	0.16	1.22437	0.317469	0.88612	0.986664	S	258	___2	EGSEKRLLGENSVPPSPSREQTSTAIVL___	Q3YBM2	Q3YBM2	TMEM176B	Transmembrane protein 176B
1469	psites	tmt	0	0.926124	1.08649	0.129545	1.00622	0.142046	0.626682	0.948	S	596	___2	DTQRRADDFPVRDDPSDVTDEDEGPAEPPPP	Q3YEC7	Q3YEC7	RABL6	Rab-like protein 6
1470	psites	tmt	0	1.40894	0.843162	0.242526	1.18797	0.0651279	0.184843	0.834648	S	337	___2	KEASEASKENRDIEISTEEEKDTGDLKDSSL	Q4G0J3	Q4G0J3	LARP7	La-related protein 7
1471	psites	tmt	0	1.14871	0.930881	0.00479503	1.06931	0.252535	0.567588	0.936012	S	261	___2	TSISKMKRSRPTSEGSDIESTEPQKQCSKKK	Q4G0J3	Q4G0J3	LARP7	La-related protein 7
1472	psites	tmt	0	1.07724	0.922515	0.0759532	0.993769	0.0712771	0.205209	0.834648	S	658	___2	HEERRRQQPPLGPSSSLLSLPGLKSRGSRAA	Q4KMP7	Q4KMP7	TBC1D10B	TBC1 domain family member 10B
1473	psites	tmt	0	1.03308	0.945523	0.0660307	0.976797	0.0421885	0.434366	0.897566	S	661	___2	RRRQQPPLGPSSSLLSLPGLKSRGSRAAGGA	Q4KMP7	Q4KMP7	TBC1D10B	TBC1 domain family member 10B
1474	psites	tmt	0	1.09485	0.872183	0.175763	0.954908	0.182317	0.666666	0.960733	S	156	___2	QPSPVMTRRGLRDSHSSEEDEASSQTDLSQT	Q5JTV8	Q5JTV8	TOR1AIP1	Torsin-1A-interacting protein 1
1475	psites	tmt	0	1.09485	0.872183	0.175763	0.954908	0.182317	0.666666	0.960733	S	157	___2	PSPVMTRRGLRDSHSSEEDEASSQTDLSQTI	Q5JTV8	Q5JTV8	TOR1AIP1	Torsin-1A-interacting protein 1
1476	psites	tmt	0	1.14286	0.921297	0.21996	1.05291	0.084091	0.481052	0.90494	S	276	___2	TPPAHPPPRSSSLGNSPERGPLRPFVPEQEL	Q5SQI0	Q5SQI0	ATAT1	Alpha-tubulin N-acetyltransferase 1
1477	psites	tmt	0	0.910723	1.16157	0.129292	1.05787	0.0232935	0.43821	0.897566	S	275	___2	SDVALNGRQAEATRASPPRSPAEPKGSALGP	Q5T0Z8	Q5T0Z8	C6orf132	Uncharacterized protein C6orf132
1478	psites	tmt	0	0.910723	1.16157	0.129292	1.05787	0.0232935	0.43821	0.897566	S	279	___2	LNGRQAEATRASPPRSPAEPKGSALGPNPEP	Q5T0Z8	Q5T0Z8	C6orf132	Uncharacterized protein C6orf132
1479	psites	tmt	0	1.04583	1.07615	0.0936598	1.12547	0.154898	0.7125	0.972472	S	1164	___2	GAALRPSHHSQRSSLSGDEEDELFKGATLKA	Q5T1M5	Q5T1M5	FKBP15	FK506-binding protein 15
1480	psites	tmt	0	0.757521	1.00826	0.121803	0.763778	0.0476427	0.0975731	0.834648	S	265	___2	NSKTNQSKKKGPRTPSPPPPIPEDIALGKKY	Q5T200	Q5T200	ZC3H13	Zinc finger CCCH domain-containing protein 13
1481	psites	tmt	0	0.923165	1.01744	0.0539464	0.93927	0.0368744	0.105677	0.834648	S	207	___2	IIKKEVSPEVVRSKLSPSPSLRKSSKSPKRK	Q5T200	Q5T200	ZC3H13	Zinc finger CCCH domain-containing protein 13
1482	psites	tmt	0	0.988836	0.989888	0.0717605	0.978837	0.0858519	0.836022	0.986664	S	209	___2	KKEVSPEVVRSKLSPSPSLRKSSKSPKRKSS	Q5T200	Q5T200	ZC3H13	Zinc finger CCCH domain-containing protein 13
1483	psites	tmt	0	0.890401	1.07035	0.0692409	0.953038	0.0500771	0.0831879	0.834648	S	1280	___2	PSPLKNNPKRRPRDQSLSPSKGENKSCQVST	Q5TCQ9	Q5TCQ9	MAGI3	Membrane-associated guanylate kinase, WW and PDZ domain-containing protein 3
1484	psites	tmt	0	0.93165	1.05099	0.0889339	0.979153	0.021987	0.399203	0.888673	S	1282	___2	PLKNNPKRRPRDQSLSPSKGENKSCQVSTRA	Q5TCQ9	Q5TCQ9	MAGI3	Membrane-associated guanylate kinase, WW and PDZ domain-containing protein 3
1485	psites	tmt	0	1.11242	1.05738	0.241007	1.17625	0.472327	0.866979	0.986664	S	527	___2	HSDSKDQSDKHDRRRSQSIEQESQEKQHKNK	Q5VTL8	Q5VTL8	PRPF38B	Pre-mRNA-splicing factor 38B
1486	psites	tmt	0	1.11242	1.05738	0.241007	1.17625	0.472327	0.866979	0.986664	S	529	___2	DSKDQSDKHDRRRSQSIEQESQEKQHKNKDE	Q5VTL8	Q5VTL8	PRPF38B	Pre-mRNA-splicing factor 38B
1487	psites	tmt	0	0.998342	1.10675	0.100632	1.10491	0.0424679	0.977935	1	S	732	___2	EVCDASAIVAKHSQPSPEPHSPTEPPAWGSS	Q5VZ89	Q5VZ89	DENND4C	DENN domain-containing protein 4C
1488	psites	tmt	0	0.998342	1.10675	0.100632	1.10491	0.0424679	0.977935	1	S	737	___2	SAIVAKHSQPSPEPHSPTEPPAWGSSIVKVP	Q5VZ89	Q5VZ89	DENND4C	DENN domain-containing protein 4C
1489	psites	tmt	0	0.859104	0.996075	0.0639268	0.855731	0.286838	0.349474	0.874972	S	1101	___2	RSTSLSALVRSSPHGSLGSVVNSLSGLKLDN	Q5VZ89	Q5VZ89	DENND4C	DENN domain-containing protein 4C
1490	psites	tmt	0	0.934498	1.02144	0.0738785	0.954532	0.0621152	0.214211	0.834648	S	260	___2	TSASQAKASAPERTPSPAPKRKKRAKSCSRC	Q63ZY6	Q63ZY6	NSUN5P2	Putative methyltransferase NSUN5C
1491	psites	tmt	0	1.35862	0.818445	0.113219	1.11196	0.0583895	0.0758001	0.834648	S	158	___2	VLDSAFEQLDIKAGNSDSEEDDANGRVELIL	Q641Q2;Q9Y4E1	Q641Q2	FAM21A;FAM21C	WASH complex subunit FAM21A;WASH complex subunit FAM21C
1492	psites	tmt	0	1.35862	0.818445	0.113219	1.11196	0.0583895	0.0758001	0.834648	S	160	___2	DSAFEQLDIKAGNSDSEEDDANGRVELILEP	Q641Q2;Q9Y4E1	Q641Q2	FAM21A;FAM21C	WASH complex subunit FAM21A;WASH complex subunit FAM21C
1493	psites	tmt	0	0.890665	0.939593	0.0961084	0.836862	0.210439	0.527977	0.930181	S	333	___2	KPRKTLKEKKERRTPSDDEEDNLFAPPKLTD	Q641Q2;Q9Y4E1	Q641Q2	FAM21A;FAM21C	WASH complex subunit FAM21A;WASH complex subunit FAM21C
1494	psites	tmt	0	1.18209	1.03618	0.217043	1.22486	0.256505	0.397946	0.888673	S	335	___2	VPGQAFCSHTESAPNSPRIGSPLSPKKNSET	Q659C4	Q659C4	LARP1B	La-related protein 1B
1495	psites	tmt	0	1.20747	0.944634	0.202041	1.14062	0.355964	0.454299	0.902495	S	640	___2	ELPLAASSIPRPRTPSPESHRSPAEGSERLS	Q66K74	Q66K74	MAP1S	Microtubule-associated protein 1S;MAP1S heavy chain;MAP1S light chain
1496	psites	tmt	0	1.30322	0.816237	0.0272905	1.06374	0.111597	0.084524	0.834648	S	860	___2	ERLRSGNASTMTRRGSSPGSLEIPKDLPDIL	Q6GYQ0	Q6GYQ0	RALGAPA1	Ral GTPase-activating protein subunit alpha-1
1497	psites	tmt	0	1.30322	0.816237	0.0272905	1.06374	0.111597	0.084524	0.834648	S	861	___2	RLRSGNASTMTRRGSSPGSLEIPKDLPDILN	Q6GYQ0	Q6GYQ0	RALGAPA1	Ral GTPase-activating protein subunit alpha-1
1498	psites	tmt	0	0.751691	1.22382	0.0477224	0.919936	0.182404	0.160153	0.834648	S	536	___2	WQLYEWQQRQQFRHGSPTAPICLGSPEFTDQ	Q6IQ23	Q6IQ23	PLEKHA7	Pleckstrin homology domain-containing family A member 7
1499	psites	tmt	0	0.751691	1.22382	0.0477224	0.919936	0.182404	0.160153	0.834648	S	545	___2	QQFRHGSPTAPICLGSPEFTDQGRSRSMLEV	Q6IQ23	Q6IQ23	PLEKHA7	Pleckstrin homology domain-containing family A member 7
1500	psites	tmt	0	0.992592	1.12427	0.0600479	1.11594	0.0414466	0.859729	0.986664	S	903	___2	YVPYRPHPPQLRKVTSPLQSPTKAKPKVEDE	Q6IQ23	Q6IQ23	PLEKHA7	Pleckstrin homology domain-containing family A member 7
1501	psites	tmt	0	0.92886	1.19033	0.115534	1.10565	0.0565481	0.30982	0.858718	S	907	___2	RPHPPQLRKVTSPLQSPTKAKPKVEDEAPPR	Q6IQ23	Q6IQ23	PLEKHA7	Pleckstrin homology domain-containing family A member 7
1502	psites	tmt	0	1.02304	0.987236	0.230893	1.00998	0.186567	0.858973	0.986664	S	274	___2	GDSSTMRNAASFPLRSPQPVCSPAGSEGTPK	Q6KC79	Q6KC79	NIPBL	Nipped-B-like protein
1503	psites	tmt	0	1.02304	0.987236	0.230893	1.00998	0.186567	0.858973	0.986664	S	280	___2	RNAASFPLRSPQPVCSPAGSEGTPKGSRPPL	Q6KC79	Q6KC79	NIPBL	Nipped-B-like protein
1504	psites	tmt	0	0.976718	1.30541	0.136625	1.27502	0.222133	0.799068	0.986664	S	310	___2	STLNSTTQTPNKIAISPLKSPNKAVKSTVQT	Q6MZP7	Q6MZP7	LIN54	Protein lin-54 homolog
1505	psites	tmt	0	0.976718	1.30541	0.136625	1.27502	0.222133	0.799068	0.986664	S	314	___2	STTQTPNKIAISPLKSPNKAVKSTVQTITVG	Q6MZP7	Q6MZP7	LIN54	Protein lin-54 homolog
1506	psites	tmt	0	1.30157	0.913543	0.0435773	1.18904	0.0662837	0.0426658	0.834648	S	273	___2	EEYSEKKKGSHKRSASWGSTDQLKEIAKLRQ	Q6P1L5	Q6P1L5	FAM117B	Protein FAM117B
1507	psites	tmt	0	1.05645	0.947153	0.0872284	1.00062	0.120991	0.50023	0.912693	S	914	___2	VPAPRLPAKDWKTKGSPRTSPKLKRKSKKDD	Q6P2E9	Q6P2E9	EDC4	Enhancer of mRNA-decapping protein 4
1508	psites	tmt	0	1.06962	0.939169	0.0682126	1.00455	0.109237	0.354937	0.874972	S	918	___2	RLPAKDWKTKGSPRTSPKLKRKSKKDDGDAA	Q6P2E9	Q6P2E9	EDC4	Enhancer of mRNA-decapping protein 4
1509	psites	tmt	0	0.941829	1.13804	0.154837	1.07184	0.0106369	0.613905	0.948	S	718	___2	GQKPFKRSLRGSDALSETSSVSHIEDLEKVE	Q6P996	Q6P996	PDXDC1	Pyridoxal-dependent decarboxylase domain-containing protein 1
1510	psites	tmt	0	0.945925	1.08592	0.0363101	1.0272	0.096976	0.305852	0.858718	S	310	___2	FWMAIGGDRDEIEGLSSDEEH__________	Q6PD74	Q6PD74	AAGAB	Alpha- and gamma-adaptin-binding protein p34
1511	psites	tmt	0	0.945925	1.08592	0.0363101	1.0272	0.096976	0.305852	0.858718	S	311	___2	WMAIGGDRDEIEGLSSDEEH___________	Q6PD74	Q6PD74	AAGAB	Alpha- and gamma-adaptin-binding protein p34
1512	psites	tmt	0	0.895472	1.19804	0.0530054	1.07281	0.0541372	0.0647948	0.834648	S	517	___2	CPEFVPRQHYQKETESAPGSPRAVTPVPTKT	Q6PKG0	Q6PKG0	LARP1	La-related protein 1
1513	psites	tmt	0	0.895472	1.19804	0.0530054	1.07281	0.0541372	0.0647948	0.834648	S	521	___2	VPRQHYQKETESAPGSPRAVTPVPTKTEEVS	Q6PKG0	Q6PKG0	LARP1	La-related protein 1
1514	psites	tmt	0	1.12217	1.05056	0.0418335	1.1789	0.0611872	0.0211169	0.812212	S	627	___2	EMEQMDGRKNTFTAWSDEESDYEIDDRDVNK	Q6PKG0	Q6PKG0	LARP1	La-related protein 1
1515	psites	tmt	0	1.12637	1.044	0.037859	1.17593	0.0621608	0.0170349	0.795451	S	631	___2	MDGRKNTFTAWSDEESDYEIDDRDVNKILIV	Q6PKG0	Q6PKG0	LARP1	La-related protein 1
1516	psites	tmt	0	1.38821	0.948298	0.217438	1.31643	0.120102	0.042658	0.834648	S	766	___2	ANKLFGAPEPSTIARSLPTTVPESPNYRNTR	Q6PKG0	Q6PKG0	LARP1	La-related protein 1
1517	psites	tmt	0	1.33939	0.96536	0.2292	1.293	0.110898	0.0647009	0.834648	S	774	___2	EPSTIARSLPTTVPESPNYRNTRTPRTPRTP	Q6PKG0	Q6PKG0	LARP1	La-related protein 1
1518	psites	tmt	0	1.21655	0.925129	0.100179	1.12547	0.179313	0.119723	0.834648	S	1385	___2	SFESRLTPSRFMKALSYASLDKEDLLSPINQ	Q6R327	Q6R327	RICTOR	Rapamycin-insensitive companion of mTOR
1519	psites	tmt	0	1.21655	0.925129	0.100179	1.12547	0.179313	0.119723	0.834648	S	1388	___2	SRLTPSRFMKALSYASLDKEDLLSPINQNTL	Q6R327	Q6R327	RICTOR	Rapamycin-insensitive companion of mTOR
1520	psites	tmt	0	0.826934	1.04759	0.269871	0.866285	0.0715005	0.478192	0.90494	S	492	___2	RERERTRERERERDHSPTPSVFNSDEERYRY	Q6UN15	Q6UN15	FIP1L1	Pre-mRNA 3'-end-processing factor FIP1
1521	psites	tmt	0	0.826934	1.04759	0.269871	0.866285	0.0715005	0.478192	0.90494	S	500	___2	RERERDHSPTPSVFNSDEERYRYREYAERGY	Q6UN15	Q6UN15	FIP1L1	Pre-mRNA 3'-end-processing factor FIP1
1522	psites	tmt	0	1.02159	0.957508	0.0455299	0.978178	0.0615405	0.664113	0.960733	S	365	___2	SLSSRSPKSQDSYPGSPSLSPRHGPSSSHMH	Q6VN20	Q6VN20	RANBP10	Ran-binding protein 10
1523	psites	tmt	0	1.02159	0.957508	0.0455299	0.978178	0.0615405	0.664113	0.960733	S	369	___2	RSPKSQDSYPGSPSLSPRHGPSSSHMHNTGA	Q6VN20	Q6VN20	RANBP10	Ran-binding protein 10
1524	psites	tmt	0	0.827933	1.19542	0.109048	0.989724	0.0720434	0.180591	0.834648	S	341	___2	LEQPEAKGEIKDSSPSSSPSPKGFRKKHLFS	Q6WKZ4	Q6WKZ4	RAB11FIP1	Rab11 family-interacting protein 1
1525	psites	tmt	0	0.93841	1.51232	0.344743	1.41918	0.295637	0.812908	0.986664	S	26	___2	GPEWLRALSSGGSITSPPLSPALPKYKLADY	Q6Y7W6	Q6Y7W6	GIGYF2	PERQ amino acid-rich with GYF domain-containing protein 2
1526	psites	tmt	0	0.955512	1.29259	0.162215	1.23509	0.144006	0.69937	0.970383	S	30	___2	LRALSSGGSITSPPLSPALPKYKLADYRYGR	Q6Y7W6	Q6Y7W6	GIGYF2	PERQ amino acid-rich with GYF domain-containing protein 2
1527	psites	tmt	0	1.0841	0.951616	0.101245	1.03165	0.188951	0.56702	0.936012	S	115	___2	PFLFCREIENGNSFDSSGDELDVHQLLRQTS	Q6ZN28	Q6ZN28	MACC1	Metastasis-associated in colon cancer protein 1
1528	psites	tmt	0	1.0841	0.951616	0.101245	1.03165	0.188951	0.56702	0.936012	S	116	___2	FLFCREIENGNSFDSSGDELDVHQLLRQTSS	Q6ZN28	Q6ZN28	MACC1	Metastasis-associated in colon cancer protein 1
1529	psites	tmt	0	0.831736	1.06697	0.0172704	0.887436	0.0540127	0.0439906	0.834648	S	2739	___2	SSQFARKLWRSSRRISQVSSGETEYNPTEAR	Q6ZNJ1	Q6ZNJ1	NBEAL2	Neurobeachin-like protein 2
1530	psites	tmt	0	0.831736	1.06697	0.0172704	0.887436	0.0540127	0.0439906	0.834648	S	2742	___2	FARKLWRSSRRISQVSSGETEYNPTEAR___	Q6ZNJ1	Q6ZNJ1	NBEAL2	Neurobeachin-like protein 2
1531	psites	tmt	0	0.748372	1.11527	0.128817	0.834634	0.089156	0.0130858	0.73174	S	513	___2	PELGPDGHQRLDYVPSSASREVRHGSDPAFA	Q6ZRV2	Q6ZRV2	FAM83H	Protein FAM83H
1532	psites	tmt	0	0.68456	1.18585	0.0275605	0.811784	0.0886009	0.00192535	0.723135	S	516	___2	GPDGHQRLDYVPSSASREVRHGSDPAFAPGP	Q6ZRV2	Q6ZRV2	FAM83H	Protein FAM83H
1533	psites	tmt	0	0.945946	1.1411	0.0660298	1.07942	0.0336043	0.40585	0.89152	S	892	___2	ERKGSPTPGFSTRRGSPTTGFIEQKGSPTSA	Q6ZRV2	Q6ZRV2	FAM83H	Protein FAM83H
1534	psites	tmt	0	0.945946	1.1411	0.0660298	1.07942	0.0336043	0.40585	0.89152	S	903	___2	TRRGSPTTGFIEQKGSPTSAYPERRGSPVPP	Q6ZRV2	Q6ZRV2	FAM83H	Protein FAM83H
1535	psites	tmt	0	0.947031	0.982354	0.087542	0.93032	0.086314	0.595963	0.941922	S	465	___2	LQESLQLSTEPRGPGSPPRTPPAPGPPSFEE	Q6ZTN6	Q6ZTN6	ANKRD13D	Ankyrin repeat domain-containing protein 13D
1536	psites	tmt	0	1.15756	0.994013	0.257852	1.15063	0.0604702	0.481554	0.90494	S	890	___2	TDDRFRMDSRFLETDSEEEQEEVNEKKTAEE	Q76FK4	Q76FK4	NOL8	Nucleolar protein 8
1537	psites	tmt	0	1.04579	0.964214	0.196667	1.00836	0.346031	0.926916	0.992252	S	834	___2	SHPQGPSSCRQEKAPSPTGPALISGASPVHC	Q76L83	Q76L83	ASXL2	Putative Polycomb group protein ASXL2
1538	psites	tmt	0	1.13483	1.0181	0.0674951	1.15536	0.312898	0.699367	0.970383	S	845	___2	EKAPSPTGPALISGASPVHCAADGTVELKAG	Q76L83	Q76L83	ASXL2	Putative Polycomb group protein ASXL2
1539	psites	tmt	0	1.53795	0.904653	0.21827	1.39131	0.181504	0.164773	0.834648	S	411	___2	QMKKFVEWLKNAEEESESEAEEGD_______	Q7L1Q6	Q7L1Q6	BZW1	Basic leucine zipper and W2 domain-containing protein 1
1540	psites	tmt	0	1.53795	0.904653	0.21827	1.39131	0.181504	0.164773	0.834648	S	413	___2	KKFVEWLKNAEEESESEAEEGD_________	Q7L1Q6	Q7L1Q6	BZW1	Basic leucine zipper and W2 domain-containing protein 1
1541	psites	tmt	0	1.05515	1.0022	0.0517119	1.05747	0.11812	0.492084	0.910419	S	115	___2	PEKLYSPKRIDFTPVSPAPSPTRGFGKMFVS	Q7Z309	Q7Z309	FAM122B	Protein FAM122B
1542	psites	tmt	0	1.10028	1.00477	0.0498659	1.10553	0.145796	0.319564	0.858718	S	119	___2	YSPKRIDFTPVSPAPSPTRGFGKMFVSSSGL	Q7Z309	Q7Z309	FAM122B	Protein FAM122B
1543	psites	tmt	0	0.994015	1.09097	0.0826654	1.08444	0.170915	0.884772	0.986664	S	1017	___2	QNNVGDTSRGQVIIISDSDDDDDERILSLEK	Q7Z333	Q7Z333	SETX	Probable helicase senataxin
1544	psites	tmt	0	0.994015	1.09097	0.0826654	1.08444	0.170915	0.884772	0.986664	S	1019	___2	NVGDTSRGQVIIISDSDDDDDERILSLEKLT	Q7Z333	Q7Z333	SETX	Probable helicase senataxin
1545	psites	tmt	0	0.991687	1.08583	0.138779	1.0768	0.180815	0.913529	0.990987	S	1969	___2	TRTVRQVFRLEEGVASDEEAEEAQPGSGPSP	Q7Z406	Q7Z406	MYH14	Myosin-14
1546	psites	tmt	0	1.05377	0.978521	0.0260004	1.03114	0.0564549	0.360358	0.874972	S	1983	___2	ASDEEAEEAQPGSGPSPEPEGSPPAHPQ___	Q7Z406	Q7Z406	MYH14	Myosin-14
1547	psites	tmt	0	1.20232	1.00821	0.342444	1.21219	0.0987804	0.381125	0.879147	S	1989	___2	EEAQPGSGPSPEPEGSPPAHPQ_________	Q7Z406	Q7Z406	MYH14	Myosin-14
1548	psites	tmt	0	0.933026	1.06508	0.0482072	0.993744	0.157572	0.394484	0.888152	S	221	___2	ETNDTWNSQFGKRPESPSEISPIKGSVRTGL	Q7Z5K2	Q7Z5K2	WAPAL	Wings apart-like protein homolog
1549	psites	tmt	0	0.933026	1.06508	0.0482072	0.993744	0.157572	0.394484	0.888152	S	226	___2	WNSQFGKRPESPSEISPIKGSVRTGLFEWDN	Q7Z5K2	Q7Z5K2	WAPAL	Wings apart-like protein homolog
1550	psites	tmt	0	1.03292	1.01923	0.130605	1.05278	0.137856	0.834842	0.986664	S	999	___2	VPLVMPVCRRKEDEVSIGSAPLAKQQSYQAS	Q7Z7G8	Q7Z7G8	VPS13B	Vacuolar protein sorting-associated protein 13B
1551	psites	tmt	0	1.03292	1.01923	0.130605	1.05278	0.137856	0.834842	0.986664	S	1002	___2	VMPVCRRKEDEVSIGSAPLAKQQSYQASEYA	Q7Z7G8	Q7Z7G8	VPS13B	Vacuolar protein sorting-associated protein 13B
1552	psites	tmt	0	0.941765	1.09786	0.0406335	1.03393	0.114879	0.542055	0.936012	S	179	___2	DDRDLSERALPRRSTSPIIGSPPVRAVPIGT	Q86TB9	Q86TB9	PATL1	Protein PAT1 homolog 1
1553	psites	tmt	0	0.942616	1.09042	0.0312491	1.02785	0.0823521	0.293718	0.858718	S	184	___2	SERALPRRSTSPIIGSPPVRAVPIGTPPKQM	Q86TB9	Q86TB9	PATL1	Protein PAT1 homolog 1
1554	psites	tmt	0	0.767647	1.228	0.115149	0.942667	0.185538	0.0594128	0.834648	S	353	___2	QGGRLSAITMALQYGSESEEDAALAAARYEE	Q86U86	Q86U86	PBRM1	Protein polybromo-1
1555	psites	tmt	0	0.767647	1.228	0.115149	0.942667	0.185538	0.0594128	0.834648	S	355	___2	GRLSAITMALQYGSESEEDAALAAARYEEGE	Q86U86	Q86U86	PBRM1	Protein polybromo-1
1556	psites	tmt	0	0.790786	1.1972	0.0179985	0.946731	0.295239	0.349753	0.874972	S	484	___2	TQTPQLHFLDTDDEVSPTSWGDSRQAQASYY	Q86US8	Q86US8	SMG6	Telomerase-binding protein EST1A
1557	psites	tmt	0	1.05632	0.984004	0.0759752	1.03943	0.08257	0.378114	0.879147	S	21	___2	NKTRLPHPRRREAPGSPPLSPRGHCPPAPAK	Q86UU0	Q86UU0	BCL9L	B-cell CLL/lymphoma 9-like protein
1558	psites	tmt	0	1.05632	0.984004	0.0759752	1.03943	0.08257	0.378114	0.879147	S	25	___2	LPHPRRREAPGSPPLSPRGHCPPAPAKPMHP	Q86UU0	Q86UU0	BCL9L	B-cell CLL/lymphoma 9-like protein
1559	psites	tmt	0	1.01096	1.03311	0.0999767	1.04443	0.0787502	0.849709	0.986664	S	532	___2	DPWRRSKSPKKKLGVSVSPSRARRRRKTSAS	Q86VM9	Q86VM9	ZC3H18	Zinc finger CCCH domain-containing protein 18
1560	psites	tmt	0	1.01096	1.03311	0.0999767	1.04443	0.0787502	0.849709	0.986664	S	534	___2	WRRSKSPKKKLGVSVSPSRARRRRKTSASSA	Q86VM9	Q86VM9	ZC3H18	Zinc finger CCCH domain-containing protein 18
1561	psites	tmt	0	1.28501	0.86985	0.168145	1.11777	0.272381	0.166228	0.834648	S	258	___2	LRRRALHPERAMDNHSDSEEELAAFCPQLDD	Q86VR2	Q86VR2	FAM134C	Protein FAM134C
1562	psites	tmt	0	1.28501	0.86985	0.168145	1.11777	0.272381	0.166228	0.834648	S	260	___2	RRALHPERAMDNHSDSEEELAAFCPQLDDST	Q86VR2	Q86VR2	FAM134C	Protein FAM134C
1563	psites	tmt	0	1.00211	1.15497	0.0644886	1.15741	0.244509	0.918951	0.991772	S	313	___2	GTFNLSRGQTPLTEGSEDLDGHSDPEESFAR	Q86VR2	Q86VR2	FAM134C	Protein FAM134C
1564	psites	tmt	0	1.00211	1.15497	0.0644886	1.15741	0.244509	0.918951	0.991772	S	320	___2	GQTPLTEGSEDLDGHSDPEESFARDLPDFPS	Q86VR2	Q86VR2	FAM134C	Protein FAM134C
1565	psites	tmt	0	0.772294	1.18637	0.13888	0.91623	0.116409	0.183565	0.834648	S	24	___2	AFAVGVEKNWGAVVRSPEGTPQKIRQLIDEG	Q86WB0	Q86WB0	ZC3HC1	Nuclear-interacting partner of ALK
1566	psites	tmt	0	0.886481	1.15968	0.171277	1.02804	0.196714	0.575853	0.936012	S	370	___2	WDSSSPVDRPEPEAASPTTRTRPVTRSMGTG	Q86WB0	Q86WB0	ZC3HC1	Nuclear-interacting partner of ALK
1567	psites	tmt	0	0.970552	1.04807	0.0917194	1.01721	0.100486	0.782845	0.986664	S	493	___2	EQAGGGWRARRPRARSVDALDDLTPPSTAES	Q86X29	Q86X29	LSR	Lipolysis-stimulated lipoprotein receptor
1568	psites	tmt	0	1.05896	1.04654	0.0579182	1.10825	0.0575708	0.213723	0.834648	S	643	___2	SQASRERRLKKNLALSRESLVV_________	Q86X29	Q86X29	LSR	Lipolysis-stimulated lipoprotein receptor
1569	psites	tmt	0	1.05896	1.04654	0.0579182	1.10825	0.0575708	0.213723	0.834648	S	646	___2	SRERRLKKNLALSRESLVV____________	Q86X29	Q86X29	LSR	Lipolysis-stimulated lipoprotein receptor
1570	psites	tmt	0	1.04099	0.960081	0.135496	0.999436	0.200658	0.787111	0.986664	S	109	___2	ENSPTRQQFHSKPVDSDSDDDPLEAFMAEVE	Q86XP3	Q86XP3	DDX42	ATP-dependent RNA helicase DDX42
1571	psites	tmt	0	1.04099	0.960081	0.135496	0.999436	0.200658	0.787111	0.986664	S	111	___2	SPTRQQFHSKPVDSDSDDDPLEAFMAEVEDQ	Q86XP3	Q86XP3	DDX42	ATP-dependent RNA helicase DDX42
1572	psites	tmt	0	1.13915	0.897369	0.129183	1.02224	0.0806559	0.119982	0.834648	S	100	___2	MRTSHSDMKSERRPPSPDVIVLSDNEQPSSP	Q86YP4	Q86YP4	GATAD2A	Transcriptional repressor p66-alpha
1573	psites	tmt	0	0.96495	1.15344	0.0322987	1.11301	0.129345	0.715829	0.973092	S	659	___2	PIPEPRQRSRLLRSQSESSDEVTELDLSHGK	Q86YS7	Q86YS7	C2CD5	C2 domain-containing protein 5
1574	psites	tmt	0	1.03694	1.05649	0.1239	1.09551	0.128228	0.740427	0.98231	S	662	___2	EPRQRSRLLRSQSESSDEVTELDLSHGKKDA	Q86YS7	Q86YS7	C2CD5	C2 domain-containing protein 5
1575	psites	tmt	0	1.10115	0.950411	0.0681412	1.04654	0.110409	0.286269	0.855969	S	17	___2	YGSARSVGKVEPSSQSPGRSPRLPRSPRLGH	Q8IUD2	Q8IUD2	ERC1	ELKS/Rab6-interacting/CAST family member 1
1576	psites	tmt	0	1.1008	0.939739	0.0536748	1.03447	0.109579	0.260177	0.855969	S	21	___2	RSVGKVEPSSQSPGRSPRLPRSPRLGHRRTN	Q8IUD2	Q8IUD2	ERC1	ELKS/Rab6-interacting/CAST family member 1
1577	psites	tmt	0	1.28476	0.942609	0.221311	1.21102	0.28234	0.210818	0.834648	S	394	___2	DWVSEGPQPGLRRALSSDSILSPAPDARAAD	Q8IVT2	Q8IVT2	MISP	Mitotic interactor and substrate of PLK1
1578	psites	tmt	0	1.20316	0.941844	0.0663925	1.13319	0.239041	0.434691	0.897566	S	395	___2	WVSEGPQPGLRRALSSDSILSPAPDARAADP	Q8IVT2	Q8IVT2	MISP	Mitotic interactor and substrate of PLK1
1579	psites	tmt	0	1.30031	0.957435	0.200361	1.24496	0.252117	0.1559	0.834648	S	397	___2	SEGPQPGLRRALSSDSILSPAPDARAADPAP	Q8IVT2	Q8IVT2	MISP	Mitotic interactor and substrate of PLK1
1580	psites	tmt	0	0.9247	1.19419	0.230218	1.10427	0.217211	0.643782	0.953702	S	213	___2	SCDSAGEGSERIHQDSESGDELSSSSTEQIR	Q8IWW6	Q8IWW6	ARHGAP12	Rho GTPase-activating protein 12
1581	psites	tmt	0	0.9247	1.19419	0.230218	1.10427	0.217211	0.643782	0.953702	S	215	___2	DSAGEGSERIHQDSESGDELSSSSTEQIRAT	Q8IWW6	Q8IWW6	ARHGAP12	Rho GTPase-activating protein 12
1582	psites	tmt	0	1.10325	0.944064	0.226767	1.04154	0.124397	0.423539	0.896798	S	278	___2	HFRKRSHSKSPRRTRSRSPLGFYVHLKNLSL	Q8IXT5	Q8IXT5	RBM12B	RNA-binding protein 12B
1583	psites	tmt	0	1.02303	0.947898	0.222662	0.969724	0.189628	0.850815	0.986664	S	280	___2	RKRSHSKSPRRTRSRSPLGFYVHLKNLSLSI	Q8IXT5	Q8IXT5	RBM12B	RNA-binding protein 12B
1584	psites	tmt	0	0.940285	1.02881	0.0500124	0.967372	0.138672	0.378522	0.879147	S	626	___2	KRRTASPPPPPKRRASPSPPPKRRVSHSPPP	Q8IYB3	Q8IYB3	SRRM1	Serine/arginine repetitive matrix protein 1
1585	psites	tmt	0	0.940285	1.02881	0.0500124	0.967372	0.138672	0.378522	0.879147	S	628	___2	RTASPPPPPKRRASPSPPPKRRVSHSPPPKQ	Q8IYB3	Q8IYB3	SRRM1	Serine/arginine repetitive matrix protein 1
1586	psites	tmt	0	0.976651	0.991037	0.0222763	0.967898	0.0230561	0.191741	0.834648	S	402	___2	RLSPSASPPRRRHRPSPPATPPPKTRHSPTP	Q8IYB3	Q8IYB3	SRRM1	Serine/arginine repetitive matrix protein 1
1587	psites	tmt	0	0.931583	1.02834	0.0735913	0.957984	0.0512069	0.175954	0.834648	S	738	___2	RVSRTPEPKKIKKAASPSPQSVRRVSSSRSV	Q8IYB3	Q8IYB3	SRRM1	Serine/arginine repetitive matrix protein 1
1588	psites	tmt	0	0.875542	1.07135	0.122878	0.938015	0.0725383	0.117955	0.834648	S	740	___2	SRTPEPKKIKKAASPSPQSVRRVSSSRSVSG	Q8IYB3	Q8IYB3	SRRM1	Serine/arginine repetitive matrix protein 1
1589	psites	tmt	0	0.909914	1.02367	0.0460196	0.931448	0.0488095	0.0311753	0.834648	S	743	___2	PEPKKIKKAASPSPQSVRRVSSSRSVSGSPE	Q8IYB3	Q8IYB3	SRRM1	Serine/arginine repetitive matrix protein 1
1590	psites	tmt	0	1.0276	1.07005	0.0463522	1.09959	0.160363	0.860094	0.986664	S	874	___2	QEEPVAAPEPKKETESEAEDNLDDLEKHLRE	Q8IYB3	Q8IYB3	SRRM1	Serine/arginine repetitive matrix protein 1
1591	psites	tmt	0	1.39282	0.831295	0.299181	1.15784	0.321588	0.273363	0.855969	S	769	___2	SGSPEPAAKKPPAPPSPVQSQSPSTNWSPAV	Q8IYB3	Q8IYB3	SRRM1	Serine/arginine repetitive matrix protein 1
1592	psites	tmt	0	0.883696	1.05588	0.0913043	0.933073	0.174541	0.453117	0.902495	S	426	___2	TRHSPTPQQSNRTRKSRVSVSPGRTSGKVTK	Q8IYB3	Q8IYB3	SRRM1	Serine/arginine repetitive matrix protein 1
1593	psites	tmt	0	1.00574	1.00385	0.0886798	1.00961	0.0726887	0.925381	0.991803	S	429	___2	SPTPQQSNRTRKSRVSVSPGRTSGKVTKHKG	Q8IYB3	Q8IYB3	SRRM1	Serine/arginine repetitive matrix protein 1
1594	psites	tmt	0	0.936996	1.02636	0.0866672	0.961695	0.117544	0.398391	0.888673	S	431	___2	TPQQSNRTRKSRVSVSPGRTSGKVTKHKGTE	Q8IYB3	Q8IYB3	SRRM1	Serine/arginine repetitive matrix protein 1
1595	psites	tmt	0	0.875711	1.04546	0.128223	0.915521	0.318021	0.355701	0.874972	S	450	___2	TSGKVTKHKGTEKRESPSPAPKPRKVELSES	Q8IYB3	Q8IYB3	SRRM1	Serine/arginine repetitive matrix protein 1
1596	psites	tmt	0	0.875711	1.04546	0.128223	0.915521	0.318021	0.355701	0.874972	S	452	___2	GKVTKHKGTEKRESPSPAPKPRKVELSESEE	Q8IYB3	Q8IYB3	SRRM1	Serine/arginine repetitive matrix protein 1
1597	psites	tmt	0	0.959697	0.941181	0.0378753	0.903248	0.0461909	0.214468	0.834648	S	389	___2	PPKRTSSPPRKTRRLSPSASPPRRRHRPSPP	Q8IYB3	Q8IYB3	SRRM1	Serine/arginine repetitive matrix protein 1
1598	psites	tmt	0	0.959697	0.941181	0.0378753	0.903248	0.0461909	0.214468	0.834648	S	393	___2	TSSPPRKTRRLSPSASPPRRRHRPSPPATPP	Q8IYB3	Q8IYB3	SRRM1	Serine/arginine repetitive matrix protein 1
1599	psites	tmt	0	0.94415	1.01751	0.0736943	0.960684	0.102111	0.383143	0.879147	S	653	___2	SPPPKQRSSPVTKRRSPSLSSKHRKGSSPSR	Q8IYB3	Q8IYB3	SRRM1	Serine/arginine repetitive matrix protein 1
1600	psites	tmt	0	0.94415	1.01751	0.0736943	0.960684	0.102111	0.383143	0.879147	S	655	___2	PPKQRSSPVTKRRSPSLSSKHRKGSSPSRST	Q8IYB3	Q8IYB3	SRRM1	Serine/arginine repetitive matrix protein 1
1601	psites	tmt	0	0.887917	1.06726	0.0960896	0.94764	0.28495	0.348645	0.874972	S	616	___2	QRRYSPSPPPKRRTASPPPPPKRRASPSPPP	Q8IYB3	Q8IYB3	SRRM1	Serine/arginine repetitive matrix protein 1
1602	psites	tmt	0	0.977441	1.00179	0.161295	0.979193	0.340623	0.780878	0.986664	S	636	___2	PKRRASPSPPPKRRVSHSPPPKQRSSPVTKR	Q8IYB3	Q8IYB3	SRRM1	Serine/arginine repetitive matrix protein 1
1603	psites	tmt	0	0.977441	1.00179	0.161295	0.979193	0.340623	0.780878	0.986664	S	638	___2	RRASPSPPPKRRVSHSPPPKQRSSPVTKRRS	Q8IYB3	Q8IYB3	SRRM1	Serine/arginine repetitive matrix protein 1
1604	psites	tmt	0	0.940412	1.01273	0.0711532	0.95238	0.0618862	0.242868	0.85307	S	725	___2	RRQSPSPSTRPIRRVSRTPEPKKIKKAASPS	Q8IYB3	Q8IYB3	SRRM1	Serine/arginine repetitive matrix protein 1
1605	psites	tmt	0	0.880722	1.02818	0.135743	0.905539	0.355879	0.392617	0.888152	S	605	___2	SPSPRRYSPPIQRRYSPSPPPKRRTASPPPP	Q8IYB3	Q8IYB3	SRRM1	Serine/arginine repetitive matrix protein 1
1606	psites	tmt	0	0.880722	1.02818	0.135743	0.905539	0.355879	0.392617	0.888152	S	607	___2	SPRRYSPPIQRRYSPSPPPKRRTASPPPPPK	Q8IYB3	Q8IYB3	SRRM1	Serine/arginine repetitive matrix protein 1
1607	psites	tmt	0	0.930283	0.978222	0.0394887	0.910024	0.0258962	0.0224058	0.812212	S	754	___2	PSPQSVRRVSSSRSVSGSPEPAAKKPPAPPS	Q8IYB3	Q8IYB3	SRRM1	Serine/arginine repetitive matrix protein 1
1608	psites	tmt	0	0.916951	0.992611	0.0238111	0.910176	0.0259282	0.00254589	0.723135	S	756	___2	PQSVRRVSSSRSVSGSPEPAAKKPPAPPSPV	Q8IYB3	Q8IYB3	SRRM1	Serine/arginine repetitive matrix protein 1
1609	psites	tmt	0	0.951146	1.07629	0.084151	1.02371	0.103937	0.465569	0.902495	S	859	___2	NARPQRVLDTSSLTQSAPASPTNKGVHIHQA	Q8N122	Q8N122	RPTOR	Regulatory-associated protein of mTOR
1610	psites	tmt	0	0.951146	1.07629	0.084151	1.02371	0.103937	0.465569	0.902495	S	863	___2	QRVLDTSSLTQSAPASPTNKGVHIHQAGGSP	Q8N122	Q8N122	RPTOR	Regulatory-associated protein of mTOR
1611	psites	tmt	0	0.875163	1.03529	0.362266	0.906044	0.195083	0.764603	0.98551	S	1058	___2	SYRNSLLAGGDDDTMSVISGISSRGSTVRSK	Q8N3U4	Q8N3U4	STAG2	Cohesin subunit SA-2
1612	psites	tmt	0	0.875163	1.03529	0.362266	0.906044	0.195083	0.764603	0.98551	S	1064	___2	LAGGDDDTMSVISGISSRGSTVRSKKSKPST	Q8N3U4	Q8N3U4	STAG2	Cohesin subunit SA-2
1613	psites	tmt	0	0.907096	1.11663	0.00525184	1.01289	0.131885	0.262753	0.855969	S	778	___2	SLERNRVGVSSKPDSSPVLSPGNKAKPDDHR	Q8N4C8	Q8N4C8	MINK1	Misshapen-like kinase 1
1614	psites	tmt	0	0.907096	1.11663	0.00525184	1.01289	0.131885	0.262753	0.855969	S	782	___2	NRVGVSSKPDSSPVLSPGNKAKPDDHRSRPG	Q8N4C8	Q8N4C8	MINK1	Misshapen-like kinase 1
1615	psites	tmt	0	0.848072	1.06964	0.093504	0.907132	0.0484441	0.0577192	0.834648	S	342	___2	IISLGKKKPSTDEQTSSAEEDVPTCGYLNVL	Q8N556	Q8N556	AFAP1	Actin filament-associated protein 1
1616	psites	tmt	0	0.848072	1.06964	0.093504	0.907132	0.0484441	0.0577192	0.834648	S	343	___2	ISLGKKKPSTDEQTSSAEEDVPTCGYLNVLS	Q8N556	Q8N556	AFAP1	Actin filament-associated protein 1
1617	psites	tmt	0	1.1933	0.929504	0.0165024	1.10918	0.123752	0.189885	0.834648	S	499	___2	GEDMLVWRWTKPSSFSDSER___________	Q8NC56	Q8NC56	LEMD2	LEM domain-containing protein 2
1618	psites	tmt	0	1.1933	0.929504	0.0165024	1.10918	0.123752	0.189885	0.834648	S	501	___2	DMLVWRWTKPSSFSDSER_____________	Q8NC56	Q8NC56	LEMD2	LEM domain-containing protein 2
1619	psites	tmt	0	0.694014	1.6636	0.176346	1.15456	0.434954	0.355669	0.874972	S	54	___2	SRGTLDVVSVDLVTDSDEEILEVATARGAAD	Q8NCF5	Q8NCF5	NFATC2IP	NFATC2-interacting protein
1620	psites	tmt	0	1.0033	1.02693	0.10095	1.03032	0.18097	0.962129	0.999803	S	201	___2	EKKKTEFLDLDNSPLSPPSPRTKSRTHTRAL	Q8NCF5	Q8NCF5	NFATC2IP	NFATC2-interacting protein
1621	psites	tmt	0	1.0547	0.99418	0.162308	1.04857	0.153306	0.646059	0.954394	S	204	___2	KTEFLDLDNSPLSPPSPRTKSRTHTRALKKL	Q8NCF5	Q8NCF5	NFATC2IP	NFATC2-interacting protein
1622	psites	tmt	0	0.85029	0.922432	0.171601	0.784335	0.22316	0.353213	0.874972	S	192	___2	LSQGRSSPQLDPLRKSPTMEQAVQTASAHLP	Q8ND56	Q8ND56	LSM14A	Protein LSM14 homolog A
1623	psites	tmt	0	1.0767	0.986893	0.0236256	1.06258	0.108411	0.236196	0.845101	S	109	___2	EKELMERLKKLSVPTSDEEDEVPAPKPRGGK	Q8NE71	Q8NE71	ABCF1	ATP-binding cassette sub-family F member 1
1624	psites	tmt	0	1.27634	0.963603	0.0823392	1.22989	0.165905	0.211021	0.834648	S	52	___2	VPEPGLDLSLSPRPDSPQPRHGSPGRRKGRA	Q8TAP8	Q8TAP8	PPP1R35	Protein phosphatase 1 regulatory subunit 35
1625	psites	tmt	0	0.801863	1.04004	0.0631175	0.833968	0.149716	0.0350889	0.834648	S	302	___2	DRRDKKGGNYKKRKRSPSPSPTPEAKKKNAK	Q8TAQ2	Q8TAQ2	SMARCC2	SWI/SNF complex subunit SMARCC2
1626	psites	tmt	0	0.755867	1.05001	0.00406453	0.793667	0.219342	0.202786	0.834648	S	304	___2	RDKKGGNYKKRKRSPSPSPTPEAKKKNAKKG	Q8TAQ2	Q8TAQ2	SMARCC2	SWI/SNF complex subunit SMARCC2
1627	psites	tmt	0	0.863142	1.02017	0.0876289	0.880549	0.0802664	0.0978521	0.834648	S	306	___2	KKGGNYKKRKRSPSPSPTPEAKKKNAKKGPS	Q8TAQ2	Q8TAQ2	SMARCC2	SWI/SNF complex subunit SMARCC2
1628	psites	tmt	0	0.986569	1.06579	0.192503	1.05148	0.201948	0.948536	0.996956	S	413	___2	IKQVLTAPGSAGQPRSEDEDSLEEAGSPAPG	Q8TBB5	Q8TBB5	KLHDC4	Kelch domain-containing protein 4
1629	psites	tmt	0	0.986569	1.06579	0.192503	1.05148	0.201948	0.948536	0.996956	S	418	___2	TAPGSAGQPRSEDEDSLEEAGSPAPGPCPRS	Q8TBB5	Q8TBB5	KLHDC4	Kelch domain-containing protein 4
1630	psites	tmt	0	1.0208	1.02541	0.119877	1.04674	0.0819205	0.762205	0.98551	S	498	___2	YLGDDMKRENPPVEDSSDEDDKRNQGNLYDK	Q8TCJ2	Q8TCJ2	STT3B	Dolichyl-diphosphooligosaccharide--protein glycosyltransferase subunit STT3B
1631	psites	tmt	0	1.0208	1.02541	0.119877	1.04674	0.0819205	0.762205	0.98551	S	499	___2	LGDDMKRENPPVEDSSDEDDKRNQGNLYDKA	Q8TCJ2	Q8TCJ2	STT3B	Dolichyl-diphosphooligosaccharide--protein glycosyltransferase subunit STT3B
1632	psites	tmt	0	0.916543	0.997153	0.0724346	0.913933	0.125528	0.257599	0.855001	S	39	___2	KGLRKRRGAASQARGSDSEDGEFEIQAEDDA	Q8TDD1	Q8TDD1	DDX54	ATP-dependent RNA helicase DDX54
1633	psites	tmt	0	0.916543	0.997153	0.0724346	0.913933	0.125528	0.257599	0.855001	S	41	___2	LRKRRGAASQARGSDSEDGEFEIQAEDDARA	Q8TDD1	Q8TDD1	DDX54	ATP-dependent RNA helicase DDX54
1634	psites	tmt	0	1.01111	1.04694	0.192806	1.05857	0.100749	0.853887	0.986664	S	230	___2	AREPSAFTLPPPRRSSSPEDPERDEEVLNHV	Q8TE67	Q8TE67	EPS8L3	Epidermal growth factor receptor kinase substrate 8-like protein 3
1635	psites	tmt	0	0.941061	1.1212	0.149337	1.05512	0.123536	0.643759	0.953702	S	231	___2	REPSAFTLPPPRRSSSPEDPERDEEVLNHVL	Q8TE67	Q8TE67	EPS8L3	Epidermal growth factor receptor kinase substrate 8-like protein 3
1636	psites	tmt	0	1.0952	0.904458	0.076365	0.990563	0.063864	0.113532	0.834648	S	201	___2	PGIPPEQPHQRTLEHSLPPSPRPLPRHTSAR	Q8TE67	Q8TE67	EPS8L3	Epidermal growth factor receptor kinase substrate 8-like protein 3
1637	psites	tmt	0	1.0952	0.904458	0.076365	0.990563	0.063864	0.113532	0.834648	S	205	___2	PEQPHQRTLEHSLPPSPRPLPRHTSAREPSA	Q8TE67	Q8TE67	EPS8L3	Epidermal growth factor receptor kinase substrate 8-like protein 3
1638	psites	tmt	0	1.0882	1.07511	0.157224	1.16994	0.0998617	0.353195	0.874972	S	910	___2	SSEPEREPEWRDRPGSPESPLLDAPFSRAYR	Q8TF72	Q8TF72	SHROOM3	Protein Shroom3
1639	psites	tmt	0	1.0882	1.07511	0.157224	1.16994	0.0998617	0.353195	0.874972	S	913	___2	PEREPEWRDRPGSPESPLLDAPFSRAYRNSI	Q8TF72	Q8TF72	SHROOM3	Protein Shroom3
1640	psites	tmt	0	0.962941	1.07227	0.142129	1.03253	0.127787	0.811562	0.986664	S	183	___2	QQGPPTPFDFLGRAGSPRGSPLAEGPQAFFP	Q8WUF5	Q8WUF5	PPP1R13L	RelA-associated inhibitor
1641	psites	tmt	0	0.962941	1.07227	0.142129	1.03253	0.127787	0.811562	0.986664	S	187	___2	PTPFDFLGRAGSPRGSPLAEGPQAFFPERGP	Q8WUF5	Q8WUF5	PPP1R13L	RelA-associated inhibitor
1642	psites	tmt	0	0.89197	1.08618	0.163217	0.968841	0.233022	0.434595	0.897566	S	45	___2	RTASRKGLPLGSAVSSPVLFSPVGRRSSLSS	Q8WUM0	Q8WUM0	NUP133	Nuclear pore complex protein Nup133
1643	psites	tmt	0	0.89197	1.08618	0.163217	0.968841	0.233022	0.434595	0.897566	S	50	___2	KGLPLGSAVSSPVLFSPVGRRSSLSSRGTPT	Q8WUM0	Q8WUM0	NUP133	Nuclear pore complex protein Nup133
1644	psites	tmt	0	1.19869	0.965938	0.412342	1.15786	0.202092	0.584133	0.937722	S	27	___2	GTGSRRGPLAGLGPGSTPRTASRKGLPLGSA	Q8WUM0	Q8WUM0	NUP133	Nuclear pore complex protein Nup133
1645	psites	tmt	0	0.967572	1.01928	0.1619	0.986227	0.0606004	0.844673	0.986664	S	97	___2	RGGGPLILLDLNDENSNQSFHSEGSLQKGTE	Q8WUZ0	Q8WUZ0	BCL7C	B-cell CLL/lymphoma 7 protein family member C
1646	psites	tmt	0	0.967572	1.01928	0.1619	0.986227	0.0606004	0.844673	0.986664	S	100	___2	GPLILLDLNDENSNQSFHSEGSLQKGTEPSP	Q8WUZ0	Q8WUZ0	BCL7C	B-cell CLL/lymphoma 7 protein family member C
1647	psites	tmt	0	0.9522	1.03917	0.19296	0.989494	0.101989	0.811166	0.986664	S	630	___2	EEDKAQRLLKAKKLTSDEEGEPSGKRKAEDD	Q8WVC0	Q8WVC0	LEO1	RNA polymerase-associated protein LEO1
1648	psites	tmt	0	1.30415	1.05275	0.41373	1.37294	0.0938955	0.423304	0.896798	S	988	___2	QKEVAATEEDVTRLPSPTSPFSSLSQDQAAT	Q8WWI1	Q8WWI1	LMO7	LIM domain only protein 7
1649	psites	tmt	0	0.975964	0.909735	0.0373164	0.887869	0.192886	0.709748	0.972075	S	960	___2	DIKRTPNNVVSTPAPSPDASQLASSLSSQKE	Q8WWI1	Q8WWI1	LMO7	LIM domain only protein 7
1650	psites	tmt	0	1.12205	0.939181	0.17957	1.05381	0.152895	0.556051	0.936012	S	1281	___2	YNIIPLYNSMKKKVLSDSEDEEKDADVPGTS	Q8WWQ0	Q8WWQ0	PHIP	PH-interacting protein
1651	psites	tmt	0	1.12205	0.939181	0.17957	1.05381	0.152895	0.556051	0.936012	S	1283	___2	IIPLYNSMKKKVLSDSEDEEKDADVPGTSTR	Q8WWQ0	Q8WWQ0	PHIP	PH-interacting protein
1652	psites	tmt	0	1.02841	0.963935	0.168586	0.991325	0.0789756	0.713546	0.972472	S	450	___2	YGGKSTIRDRSSGTASSVAFTPLQGLEIVNP	Q8WWY3	Q8WWY3	PRPF31	U4/U6 small nuclear ribonucleoprotein Prp31
1653	psites	tmt	0	0.843577	1.09778	0.747764	0.926063	0.0628636	0.991449	1	S	122	___2	MSARRSEPERGRLTPSPDIIVLSDNEASSPR	Q8WXI9	Q8WXI9	GATAD2B	Transcriptional repressor p66-beta
1654	psites	tmt	0	0.93168	1.07463	0.0833038	1.00121	0.132759	0.36823	0.876797	S	129	___2	PERGRLTPSPDIIVLSDNEASSPRSSSRMEE	Q8WXI9	Q8WXI9	GATAD2B	Transcriptional repressor p66-beta
1655	psites	tmt	0	0.50536	1.44071	0.698373	0.728079	0.281898	0.237596	0.845239	S	134	___2	LTPSPDIIVLSDNEASSPRSSSRMEERLKAA	Q8WXI9	Q8WXI9	GATAD2B	Transcriptional repressor p66-beta
1656	psites	tmt	0	0.842206	1.13529	0.374361	0.956151	0.366811	0.62384	0.948	S	2222	___2	KESAWSPPPIEIRLISPLASPADGVKSKPRK	Q8WYP5	Q8WYP5	AHCTF1	Protein ELYS
1657	psites	tmt	0	0.842206	1.13529	0.374361	0.956151	0.366811	0.62384	0.948	S	2226	___2	WSPPPIEIRLISPLASPADGVKSKPRKTTEV	Q8WYP5	Q8WYP5	AHCTF1	Protein ELYS
1658	psites	tmt	0	0.938655	1.03145	0.194378	0.968175	0.0921125	0.684903	0.967752	S	24	___2	TQKTSEIVLRPRNKRSRSPLELEPEAKKLCA	Q92466	Q92466	DDB2	DNA damage-binding protein 2
1659	psites	tmt	0	0.938655	1.03145	0.194378	0.968175	0.0921125	0.684903	0.967752	S	26	___2	KTSEIVLRPRNKRSRSPLELEPEAKKLCAKG	Q92466	Q92466	DDB2	DNA damage-binding protein 2
1660	psites	tmt	0	0.807767	1.04438	0.0441316	0.843617	0.00475861	0.0210441	0.812212	S	2041	___2	PLDNTSRPRYSHSYLSDSDTEAKLTETNA__	Q92614	Q92614	MYO18A	Unconventional myosin-XVIIIa
1661	psites	tmt	0	0.807767	1.04438	0.0441316	0.843617	0.00475861	0.0210441	0.812212	S	2043	___2	DNTSRPRYSHSYLSDSDTEAKLTETNA____	Q92614	Q92614	MYO18A	Unconventional myosin-XVIIIa
1662	psites	tmt	0	0.921665	1.07206	0.08292	0.988076	0.0723303	0.274641	0.855969	S	647	___2	TCSPTEDATMGSRSESLSNCSIGKKRLEKSP	Q92625	Q92625	ANKS1A	Ankyrin repeat and SAM domain-containing protein 1A
1663	psites	tmt	0	0.921665	1.07206	0.08292	0.988076	0.0723303	0.274641	0.855969	S	652	___2	EDATMGSRSESLSNCSIGKKRLEKSPSFASE	Q92625	Q92625	ANKS1A	Ankyrin repeat and SAM domain-containing protein 1A
1664	psites	tmt	0	1.04893	0.984617	0.0705529	1.03279	0.105901	0.497381	0.910559	S	663	___2	LSNCSIGKKRLEKSPSFASEWDEIEKIMSSI	Q92625	Q92625	ANKS1A	Ankyrin repeat and SAM domain-containing protein 1A
1665	psites	tmt	0	1.04893	0.984617	0.0705529	1.03279	0.105901	0.497381	0.910559	S	666	___2	CSIGKKRLEKSPSFASEWDEIEKIMSSIGEG	Q92625	Q92625	ANKS1A	Ankyrin repeat and SAM domain-containing protein 1A
1666	psites	tmt	0	1.06138	1.0935	0.293197	1.16061	0.477193	0.963588	1	S	157	___2	KEPVKIAAPELHKGDSDSEEDEPTKKKTILQ	Q92733	Q92733	PRCC	Proline-rich protein PRCC
1667	psites	tmt	0	1.06138	1.0935	0.293197	1.16061	0.477193	0.963588	1	S	159	___2	PVKIAAPELHKGDSDSEEDEPTKKKTILQGS	Q92733	Q92733	PRCC	Proline-rich protein PRCC
1668	psites	tmt	0	0.933762	1.03728	0.028084	0.968575	0.0628727	0.0906818	0.834648	S	328	___2	RRDRKASANARKRKHSPSPPPPTPTESRKKS	Q92922	Q92922	SMARCC1	SWI/SNF complex subunit SMARCC1
1669	psites	tmt	0	0.933762	1.03728	0.028084	0.968575	0.0628727	0.0906818	0.834648	S	330	___2	DRKASANARKRKHSPSPPPPTPTESRKKSGK	Q92922	Q92922	SMARCC1	SWI/SNF complex subunit SMARCC1
1670	psites	tmt	0	0.785422	0.986022	0.0217405	0.774444	0.309091	0.354868	0.874972	S	163	___2	KSVSTTNIAGHFNDESPLGLRRILSQSTDSL	Q92974	Q92974	ARHGEF2	Rho guanine nucleotide exchange factor 2
1671	psites	tmt	0	0.778454	1.19737	0.221661	0.932097	0.099068	0.298856	0.858718	S	270	___2	IQKLNSDDTYQTALLSGSDEE__________	Q96B21	Q96B21	TMEM45B	Transmembrane protein 45B
1672	psites	tmt	0	0.778454	1.19737	0.221661	0.932097	0.099068	0.298856	0.858718	S	272	___2	KLNSDDTYQTALLSGSDEE____________	Q96B21	Q96B21	TMEM45B	Transmembrane protein 45B
1673	psites	tmt	0	1.02365	0.996916	0.0513472	1.0205	0.152744	0.849759	0.986664	S	243	___2	PSWALSDTDSRVSPASPAGSPSADFAVHGES	Q96C92	Q96C92	SDCCAG3	Serologically defined colon cancer antigen 3
1674	psites	tmt	0	1.02365	0.996916	0.0513472	1.0205	0.152744	0.849759	0.986664	S	247	___2	LSDTDSRVSPASPAGSPSADFAVHGESLGDR	Q96C92	Q96C92	SDCCAG3	Serologically defined colon cancer antigen 3
1675	psites	tmt	0	0.79853	1.02838	0.157004	0.821192	0.0426179	0.198053	0.834648	S	468	___2	RKNVNIYRDSAIPVESDTDDEGAPRISLAEM	Q96D46	Q96D46	NMD3	60S ribosomal export protein NMD3
1676	psites	tmt	0	0.946643	1.07762	0.203468	1.02012	0.206441	0.765935	0.98551	S	170	___2	ADAQEPASPVVSPQQSPPTSPHTWRKHSRHP	Q96D71	Q96D71	REPS1	RalBP1-associated Eps domain-containing protein 1
1677	psites	tmt	0	1.03505	0.925141	0.0655969	0.957568	0.0974724	0.594938	0.941922	S	143	___2	VEKSASPKRIDFIPVSPAPSPTRGIGKQCFS	Q96E09	Q96E09	FAM122A	Protein FAM122A
1678	psites	tmt	0	1.05576	0.909197	0.0737788	0.959894	0.0971962	0.413881	0.896798	S	147	___2	ASPKRIDFIPVSPAPSPTRGIGKQCFSPSLQ	Q96E09	Q96E09	FAM122A	Protein FAM122A
1679	psites	tmt	0	0.880376	1.11024	0.0689826	0.977433	0.117481	0.180183	0.834648	S	421	___2	NIKVHAYFAPVTPPPSVGGSRQRFCRCCIIL	Q96IG2	Q96IG2	FBXL20	F-box/LRR-repeat protein 20
1680	psites	tmt	0	1.31561	0.967125	0.178988	1.27236	0.32077	0.286231	0.855969	S	452	___2	PELRKPSGSPDLWKLSPDQRKTSPASLDFPE	Q96JM3	Q96JM3	CHAMP1	Chromosome alignment-maintaining phosphoprotein 1
1681	psites	tmt	0	1.0521	0.943334	0.0304221	0.992478	0.0158871	0.170637	0.834648	S	282	___2	SRKSARTTSPEPRKPSPSESPEPWKPFPAVS	Q96JM3	Q96JM3	CHAMP1	Chromosome alignment-maintaining phosphoprotein 1
1682	psites	tmt	0	1.09454	1.00088	0.218115	1.0955	0.327837	0.816215	0.986664	S	297	___2	SPSESPEPWKPFPAVSPEPRRPAPAVSPGSW	Q96JM3	Q96JM3	CHAMP1	Chromosome alignment-maintaining phosphoprotein 1
1683	psites	tmt	0	1.25414	0.977495	0.111889	1.22591	0.0550864	0.011723	0.73174	S	204	___2	KSVPVCESQKLAPVPSPEPQKPAPVSPESVK	Q96JM3	Q96JM3	CHAMP1	Chromosome alignment-maintaining phosphoprotein 1
1684	psites	tmt	0	1.25414	0.977495	0.111889	1.22591	0.0550864	0.011723	0.73174	S	214	___2	LAPVPSPEPQKPAPVSPESVKATLSNPKPQK	Q96JM3	Q96JM3	CHAMP1	Chromosome alignment-maintaining phosphoprotein 1
1685	psites	tmt	0	1.10156	1.08759	0.0553976	1.19805	0.155577	0.517093	0.927429	S	900	___2	RPASLNLNRSRSLSNSNPDISGTPTSPDDEV	Q96N67	Q96N67	DOCK7	Dedicator of cytokinesis protein 7
1686	psites	tmt	0	0.964421	0.925643	0.215255	0.89271	0.146348	0.886642	0.986664	S	1430	___2	RGQLGTYTIASPPERSPSGSAFGSQENLRWR	Q96N67	Q96N67	DOCK7	Dedicator of cytokinesis protein 7
1687	psites	tmt	0	0.961076	0.956755	0.157662	0.919514	0.11244	0.777852	0.986664	S	1438	___2	IASPPERSPSGSAFGSQENLRWRKDMTHWRQ	Q96N67	Q96N67	DOCK7	Dedicator of cytokinesis protein 7
1688	psites	tmt	0	1.07314	0.927335	0.210199	0.995164	0.0990069	0.488696	0.90942	S	483	___2	VDIREEETEGGSRRLSLPGLLSQVSPRLLRK	Q96Q42	Q96Q42	ALS2	Alsin
1689	psites	tmt	0	1.07314	0.927335	0.210199	0.995164	0.0990069	0.488696	0.90942	S	492	___2	GGSRRLSLPGLLSQVSPRLLRKAARVKTRTV	Q96Q42	Q96Q42	ALS2	Alsin
1690	psites	tmt	0	0.976147	1.53387	0.115423	1.49728	0.0444712	0.759013	0.98551	S	1373	___2	RFAELPEFRPEEVLPSPTLQSLATSPRAILG	Q96RK0	Q96RK0	CIC	Protein capicua homolog
1691	psites	tmt	0	1.42673	0.812653	0.0775169	1.15944	0.0192516	0.0241964	0.812212	S	423	___2	EGGKLWSYISKFLNRSPEESFDIKEVKKPTL	Q96S38	Q96S38	RPS6KC1	Ribosomal protein S6 kinase delta-1
1692	psites	tmt	0	1.42673	0.812653	0.0775169	1.15944	0.0192516	0.0241964	0.812212	S	427	___2	LWSYISKFLNRSPEESFDIKEVKKPTLAKVH	Q96S38	Q96S38	RPS6KC1	Ribosomal protein S6 kinase delta-1
1693	psites	tmt	0	0.957429	0.982842	0.0231159	0.941001	0.103347	0.494072	0.910559	S	398	___2	EGEEEKVAKRKAAVLSDSEDEEKASAKKSRV	Q96ST2	Q96ST2	IWS1	Protein IWS1 homolog
1694	psites	tmt	0	0.957429	0.982842	0.0231159	0.941001	0.103347	0.494072	0.910559	S	400	___2	EEEKVAKRKAAVLSDSEDEEKASAKKSRVVS	Q96ST2	Q96ST2	IWS1	Protein IWS1 homolog
1695	psites	tmt	0	0.802116	0.936539	0.34752	0.751213	0.242975	0.571914	0.936012	S	622	___2	PEEVPKSTLESEKPGSPEAAETSPPSNIIDH	Q96T23	Q96T23	RSF1	Remodeling and spacing factor 1
1696	psites	tmt	0	0.802116	0.936539	0.34752	0.751213	0.242975	0.571914	0.936012	S	629	___2	TLESEKPGSPEAAETSPPSNIIDHCEKLASE	Q96T23	Q96T23	RSF1	Remodeling and spacing factor 1
1697	psites	tmt	0	0.873647	1.09868	0.121455	0.95986	0.358768	0.457442	0.902495	S	670	___2	RSPESDRPRKRHCAPSPDRSPELSSSRDRYN	Q96T37	Q96T37	RBM15	Putative RNA-binding protein 15
1698	psites	tmt	0	0.873647	1.09868	0.121455	0.95986	0.358768	0.457442	0.902495	S	674	___2	SDRPRKRHCAPSPDRSPELSSSRDRYNSDND	Q96T37	Q96T37	RBM15	Putative RNA-binding protein 15
1699	psites	tmt	0	1.05206	1.09996	0.0692238	1.15723	0.0994712	0.46446	0.902495	S	692	___2	PAGESPQPKAAPEASSPPASPLQHLLPGKAV	Q96TA1	Q96TA1	FAM129B	Niban-like protein 1
1700	psites	tmt	0	1.05206	1.09996	0.0692238	1.15723	0.0994712	0.46446	0.902495	S	696	___2	SPQPKAAPEASSPPASPLQHLLPGKAVDLGP	Q96TA1	Q96TA1	FAM129B	Niban-like protein 1
1701	psites	tmt	0	0.907484	1.24759	0.172419	1.13217	0.0678026	0.356983	0.874972	S	665	___2	VTEIRGLLAQGLRPESPPPAGPLLNGAPAGE	Q96TA1	Q96TA1	FAM129B	Niban-like protein 1
1702	psites	tmt	0	0.907484	1.24759	0.172419	1.13217	0.0678026	0.356983	0.874972	S	681	___2	PPPAGPLLNGAPAGESPQPKAAPEASSPPAS	Q96TA1	Q96TA1	FAM129B	Niban-like protein 1
1703	psites	tmt	0	1.2124	0.889014	0.197126	1.07784	0.240381	0.486212	0.907808	S	136	___2	DIQRLSLNNDIFEANSDSDQQSETKEDTSPK	Q99549	Q99549	MPHOSPH8	M-phase phosphoprotein 8
1704	psites	tmt	0	1.2124	0.889014	0.197126	1.07784	0.240381	0.486212	0.907808	S	138	___2	QRLSLNNDIFEANSDSDQQSETKEDTSPKKK	Q99549	Q99549	MPHOSPH8	M-phase phosphoprotein 8
1705	psites	tmt	0	0.709047	1.06093	0.0335373	0.752246	0.181598	0.0342326	0.834648	S	830	___2	QSPSPRRETGKESRKSQSPSPKNESARGRKK	Q99590	Q99590	SCAF11	Protein SCAF11
1706	psites	tmt	0	1.18718	1.01799	0.0422956	1.20854	0.120861	0.0810308	0.834648	S	199	___2	MRNRWKPNSSKVLGRSPLTILQDDNSPGTLT	Q99618	Q99618	CDCA3	Cell division cycle-associated protein 3
1707	psites	tmt	0	1.18718	1.01799	0.0422956	1.20854	0.120861	0.0810308	0.834648	S	209	___2	KVLGRSPLTILQDDNSPGTLTLRQGKRPSPL	Q99618	Q99618	CDCA3	Cell division cycle-associated protein 3
1708	psites	tmt	0	0.971587	0.930756	0.117471	0.90431	0.0222863	0.791969	0.986664	S	375	___2	KFRSLFFGSILAPVRSPQGPSPVLAEDSEGE	Q99638	Q99638	RAD9A	Cell cycle checkpoint control protein RAD9A
1709	psites	tmt	0	1.00846	0.932595	0.114451	0.940481	0.0758193	0.925557	0.991803	S	387	___2	PVRSPQGPSPVLAEDSEGEG___________	Q99638	Q99638	RAD9A	Cell cycle checkpoint control protein RAD9A
1710	psites	tmt	0	1.08767	1.06196	0.0905015	1.15507	0.235661	0.611867	0.948	S	684	___2	SGGTWSSVVSGVPRLSPKTHRPRSPRQNSIG	Q99700	Q99700	ATXN2	Ataxin-2
1711	psites	tmt	0	0.68397	0.907424	0.244104	0.620651	0.356045	0.186015	0.834648	S	77	___2	LAAMRAAAAGLGHPASPGGSEDGPPGSEEED	Q99856	Q99856	ARID3A	AT-rich interactive domain-containing protein 3A
1712	psites	tmt	0	0.744611	0.776493	0.427456	0.578185	0.297047	0.405363	0.89152	S	81	___2	RAAAAGLGHPASPGGSEDGPPGSEEEDAARE	Q99856	Q99856	ARID3A	AT-rich interactive domain-containing protein 3A
1713	psites	tmt	0	0.688317	1.17701	0.39135	0.810158	0.338421	0.434531	0.897566	S	88	___2	GHPASPGGSEDGPPGSEEEDAAREGTPGSPG	Q99856	Q99856	ARID3A	AT-rich interactive domain-containing protein 3A
1714	psites	tmt	0	0.904462	1.07656	0.055052	0.973709	0.255703	0.597367	0.941922	S	135	___2	EGRWGRGTAQYSSQKSVEERSLRHPLRRLEI	Q99959	Q99959	PKP2	Plakophilin-2
1715	psites	tmt	0	1.01494	0.984637	0.0634222	0.999347	0.332844	0.901604	0.989979	S	151	___2	VEERSLRHPLRRLEISPDSSPERAHYTHSDY	Q99959	Q99959	PKP2	Plakophilin-2
1716	psites	tmt	0	1.01494	0.984637	0.0634222	0.999347	0.332844	0.901604	0.989979	S	155	___2	SLRHPLRRLEISPDSSPERAHYTHSDYQYSQ	Q99959	Q99959	PKP2	Plakophilin-2
1717	psites	tmt	0	0.948374	1.09013	0.0898633	1.03385	0.118277	0.494316	0.910559	S	102	___2	VYNLHLVENDFVGGRSPVPKTYDMLKAGTTA	Q99959	Q99959	PKP2	Plakophilin-2
1718	psites	tmt	0	1.10021	0.901605	0.159561	0.991953	0.39833	0.863505	0.986664	S	1159	___2	VQRPKLEKKDAKEIPSATQSPISKKRKKKGF	Q9BQG0	Q9BQG0	MYBBP1A	Myb-binding protein 1A
1719	psites	tmt	0	0.987088	0.965249	0.155399	0.952786	0.301761	0.869591	0.986664	S	1163	___2	KLEKKDAKEIPSATQSPISKKRKKKGFLPET	Q9BQG0	Q9BQG0	MYBBP1A	Myb-binding protein 1A
1720	psites	tmt	0	1.40364	0.798056	0.425161	1.12018	0.257168	0.239228	0.848756	S	469	___2	GGRPNKKKKFKGRLKSISREPSPALGPNLDG	Q9BRZ2	Q9BRZ2	TRIM56	E3 ubiquitin-protein ligase TRIM56
1721	psites	tmt	0	1.28071	0.826244	0.43823	1.05818	0.29234	0.360293	0.874972	S	471	___2	RPNKKKKFKGRLKSISREPSPALGPNLDGSG	Q9BRZ2	Q9BRZ2	TRIM56	E3 ubiquitin-protein ligase TRIM56
1722	psites	tmt	0	1.30787	0.821619	0.435459	1.07457	0.275716	0.324766	0.862234	S	475	___2	KKKFKGRLKSISREPSPALGPNLDGSGLLPR	Q9BRZ2	Q9BRZ2	TRIM56	E3 ubiquitin-protein ligase TRIM56
1723	psites	tmt	0	1.10388	1.04739	0.0246319	1.1562	0.104181	0.124059	0.834648	S	520	___2	PDWTHPLPWGRPRTFSLDAVPPDHSPRARSV	Q9BST9	Q9BST9	RTKN	Rhotekin
1724	psites	tmt	0	1.10388	1.04739	0.0246319	1.1562	0.104181	0.124059	0.834648	S	529	___2	GRPRTFSLDAVPPDHSPRARSVAPLPPQRSP	Q9BST9	Q9BST9	RTKN	Rhotekin
1725	psites	tmt	0	0.585238	1.43517	0.364793	0.839917	0.420564	0.206813	0.834648	S	805	___2	KKTAPRQEAIPDLEDSPPVSDSEEQQESARA	Q9BTC0	Q9BTC0	DIDO1	Death-inducer obliterator 1
1726	psites	tmt	0	0.585238	1.43517	0.364793	0.839917	0.420564	0.206813	0.834648	S	809	___2	PRQEAIPDLEDSPPVSDSEEQQESARAVPEK	Q9BTC0	Q9BTC0	DIDO1	Death-inducer obliterator 1
1727	psites	tmt	0	1.16204	0.913559	0.17949	1.06159	0.111993	0.198719	0.834648	S	1030	___2	KPSSSPDPRYLSVPPSPNISTSESRSPPEGD	Q9BTC0	Q9BTC0	DIDO1	Death-inducer obliterator 1
1728	psites	tmt	0	1.06577	1.04999	0.084198	1.11905	0.133267	0.474692	0.90494	S	47	___2	PGGAVRVAAAAGSGPSPPGSPGHDRERQPLL	Q9BTU6	Q9BTU6	PI4K2A	Phosphatidylinositol 4-kinase type 2-alpha
1729	psites	tmt	0	1.06577	1.04999	0.084198	1.11905	0.133267	0.474692	0.90494	S	51	___2	VRVAAAAGSGPSPPGSPGHDRERQPLLDRAR	Q9BTU6	Q9BTU6	PI4K2A	Phosphatidylinositol 4-kinase type 2-alpha
1730	psites	tmt	0	0.897327	1.08467	0.0447418	0.973301	0.154629	0.298787	0.858718	S	87	___2	KLDLTKKGKRPPTPCSDPERKRFRFNSESES	Q9BW71	Q9BW71	HIRIP3	HIRA-interacting protein 3
1731	psites	tmt	0	0.921021	1.10757	0.0609963	1.02009	0.0549219	0.161445	0.834648	S	223	___2	AKKVEGNKGTKSLKESEQESEEEILAQKKEQ	Q9BW71	Q9BW71	HIRIP3	HIRA-interacting protein 3
1732	psites	tmt	0	0.936852	1.0898	0.0409697	1.02098	0.0556507	0.180026	0.834648	S	227	___2	EGNKGTKSLKESEQESEEEILAQKKEQREEE	Q9BW71	Q9BW71	HIRIP3	HIRA-interacting protein 3
1733	psites	tmt	0	0.910806	0.975374	0.182103	0.888376	0.258791	0.602922	0.941922	S	211	___2	AALLEEARKRRLLEDSDSEDEAAPSPLQPAL	Q9BW85	Q9BW85	CCDC94	Coiled-coil domain-containing protein 94
1734	psites	tmt	0	0.910806	0.975374	0.182103	0.888376	0.258791	0.602922	0.941922	S	213	___2	LLEEARKRRLLEDSDSEDEAAPSPLQPALRP	Q9BW85	Q9BW85	CCDC94	Coiled-coil domain-containing protein 94
1735	psites	tmt	0	1.04668	0.720172	0.0514974	0.753793	0.0645761	0.519775	0.929868	S	24	___2	PLAMGLAQPRLLSGPSQESPQTLGKESRGLR	Q9BWE0	Q9BWE0	REPIN1	Replication initiator 1
1736	psites	tmt	0	1.04668	0.720172	0.0514974	0.753793	0.0645761	0.519775	0.929868	S	27	___2	MGLAQPRLLSGPSQESPQTLGKESRGLRQQG	Q9BWE0	Q9BWE0	REPIN1	Replication initiator 1
1737	psites	tmt	0	1.25396	0.954774	0.210095	1.19725	0.130822	0.167298	0.834648	S	752	___2	DAVTFALQHPRPVPDSPVSVTRL________	Q9BXS9	Q9BXS9	SLC26A6	Solute carrier family 26 member 6
1738	psites	tmt	0	1.25396	0.954774	0.210095	1.19725	0.130822	0.167298	0.834648	S	755	___2	TFALQHPRPVPDSPVSVTRL___________	Q9BXS9	Q9BXS9	SLC26A6	Solute carrier family 26 member 6
1739	psites	tmt	0	1.00192	1.11119	0.0469997	1.11332	0.0338911	0.962387	0.999803	S	506	___2	HEAKKAAKQEARSDKSPDLAPTPAPQSTPRN	Q9BY44	Q9BY44	EIF2A	Eukaryotic translation initiation factor 2A;Eukaryotic translation initiation factor 2A, N-terminally processed
1740	psites	tmt	0	1.63434	0.989203	0.443357	1.61669	0.540982	0.464569	0.902495	S	614	___2	ELRMINKNPEREKAGSPAPSNRLNDSPTLKK	Q9BYW2	Q9BYW2	SETD2	Histone-lysine N-methyltransferase SETD2
1741	psites	tmt	0	1.63434	0.989203	0.443357	1.61669	0.540982	0.464569	0.902495	S	624	___2	REKAGSPAPSNRLNDSPTLKKLDELPIFKSE	Q9BYW2	Q9BYW2	SETD2	Histone-lysine N-methyltransferase SETD2
1742	psites	tmt	0	1.07701	0.967534	0.104656	1.04204	0.241339	0.707881	0.972075	S	424	___2	DQHIRGSPFKLKVIRSADVSPTTEGVKRRVK	Q9C040	Q9C040	TRIM2	Tripartite motif-containing protein 2
1743	psites	tmt	0	1.07994	0.963129	0.101733	1.04012	0.241942	0.694317	0.9695	S	428	___2	RGSPFKLKVIRSADVSPTTEGVKRRVKSPGS	Q9C040	Q9C040	TRIM2	Tripartite motif-containing protein 2
1744	psites	tmt	0	0.904622	1.47325	0.164423	1.33273	0.0655513	0.530476	0.930181	S	375	___2	TGNAYLTAELSTPDGSVADGEILDNKNGTYE	Q9C040	Q9C040	TRIM2	Tripartite motif-containing protein 2
1745	psites	tmt	0	1.07188	1.00211	0.0208857	1.07414	0.0462768	0.194686	0.834648	S	432	___2	HFDPLSSGSRSSSLKSAQGTGFELGQLQSIR	Q9C0B5	Q9C0B5	ZDHHC5	Palmitoyltransferase ZDHHC5
1746	psites	tmt	0	1.23032	0.883232	0.323087	1.08666	0.230136	0.399503	0.888673	S	1620	___2	HLFQDSTEPRASRVPSSDEEVVEEPQSRRTR	Q9C0C2	Q9C0C2	TNKS1BP1	182 kDa tankyrase-1-binding protein
1747	psites	tmt	0	1.23032	0.883232	0.323087	1.08666	0.230136	0.399503	0.888673	S	1621	___2	LFQDSTEPRASRVPSSDEEVVEEPQSRRTRM	Q9C0C2	Q9C0C2	TNKS1BP1	182 kDa tankyrase-1-binding protein
1748	psites	tmt	0	0.900672	1.14284	0.268004	1.02932	0.294609	0.65668	0.958951	S	60	___2	KQFCQEGQPHVLEALSPPQTSGLSPSRLSKS	Q9H063	Q9H063	MAF1	Repressor of RNA polymerase III transcription MAF1 homolog
1749	psites	tmt	0	0.995682	0.929308	0.172569	0.925295	0.0425085	0.941549	0.996956	S	499	___2	GSPSPLGGIKRKAEDSDSEPEPEDNVRLWEA	Q9H0D6	Q9H0D6	XRN2	5'-3' exoribonuclease 2
1750	psites	tmt	0	0.995682	0.929308	0.172569	0.925295	0.0425085	0.941549	0.996956	S	501	___2	PSPLGGIKRKAEDSDSEPEPEDNVRLWEAGW	Q9H0D6	Q9H0D6	XRN2	5'-3' exoribonuclease 2
1751	psites	tmt	0	0.972659	1.10897	0.046479	1.07865	0.00703532	0.499401	0.911967	S	625	___2	GESASGGLSKKLLLGSPSSLSPFSKRIKLEK	Q9H165	Q9H165	BCL11A	B-cell lymphoma/leukemia 11A
1752	psites	tmt	0	0.863604	1.19281	0.125525	1.03012	0.0817652	0.169183	0.834648	S	630	___2	GGLSKKLLLGSPSSLSPFSKRIKLEKEFDLP	Q9H165	Q9H165	BCL11A	B-cell lymphoma/leukemia 11A
1753	psites	tmt	0	0.622722	1.36316	0.228711	0.848873	0.206739	0.165235	0.834648	S	50	___2	LNLQLRQLQPASELWSSDGAAGLVGSLQEVT	Q9H1A4	Q9H1A4	ANAPC1	Anaphase-promoting complex subunit 1
1754	psites	tmt	0	0.622722	1.36316	0.228711	0.848873	0.206739	0.165235	0.834648	S	60	___2	ASELWSSDGAAGLVGSLQEVTIHEKQKESWQ	Q9H1A4	Q9H1A4	ANAPC1	Anaphase-promoting complex subunit 1
1755	psites	tmt	0	0.922923	1.15614	0.0704445	1.06703	0.141124	0.325544	0.862234	S	181	___2	EKKMPKPRLKATVTPSPVKGKGKVGRPTASK	Q9H1E3	Q9H1E3	NUCKS1	Nuclear ubiquitous casein and cyclin-dependent kinase substrate 1
1756	psites	tmt	0	0.978533	0.921346	0.150697	0.901567	0.265439	0.837793	0.986664	S	58	___2	EAKNKRRSGKNSQEDSEDSEDKDVKTKKDDS	Q9H1E3	Q9H1E3	NUCKS1	Nuclear ubiquitous casein and cyclin-dependent kinase substrate 1
1757	psites	tmt	0	0.978533	0.921346	0.150697	0.901567	0.265439	0.837793	0.986664	S	61	___2	NKRRSGKNSQEDSEDSEDKDVKTKKDDSHSA	Q9H1E3	Q9H1E3	NUCKS1	Nuclear ubiquitous casein and cyclin-dependent kinase substrate 1
1758	psites	tmt	0	0.961304	1.04659	0.0795143	1.00609	0.209794	0.637084	0.952382	S	52	___2	GQINSKFISDRESRRSLTNSHLEKKKCDEYI	Q9H2H9	Q9H2H9	SLC38A1	Sodium-coupled neutral amino acid transporter 1
1759	psites	tmt	0	0.960628	1.0376	0.0717207	0.996745	0.219069	0.629796	0.948723	S	56	___2	SKFISDRESRRSLTNSHLEKKKCDEYIPGTT	Q9H2H9	Q9H2H9	SLC38A1	Sodium-coupled neutral amino acid transporter 1
1760	psites	tmt	0	1.08653	0.873196	0.0540706	0.948755	0.276981	0.717257	0.973092	S	292	___2	PSHALEDEGWAAAAPSPGSARSMGSHTTRDS	Q9H3Q1	Q9H3Q1	CDC42EP4	Cdc42 effector protein 4
1761	psites	tmt	0	1.08653	0.873196	0.0540706	0.948755	0.276981	0.717257	0.973092	S	295	___2	ALEDEGWAAAAPSPGSARSMGSHTTRDSSSL	Q9H3Q1	Q9H3Q1	CDC42EP4	Cdc42 effector protein 4
1762	psites	tmt	0	0.965648	1.21187	0.118381	1.17024	0.423455	0.673712	0.962487	S	138	___2	NEKEAAEKGTSKLPKSLSSSPVKKANDGEGG	Q9H3Q1	Q9H3Q1	CDC42EP4	Cdc42 effector protein 4
1763	psites	tmt	0	1.00395	1.1658	0.0896092	1.1704	0.424712	0.801785	0.986664	S	142	___2	AAEKGTSKLPKSLSSSPVKKANDGEGGDEEA	Q9H3Q1	Q9H3Q1	CDC42EP4	Cdc42 effector protein 4
1764	psites	tmt	0	0.883744	1.0269	0.12184	0.907514	0.0555534	0.331467	0.866244	S	590	___2	LAHRDSSLKRLTRWGSQGNRTPSPNSNEQQK	Q9H4E7	Q9H4E7	DEF6	Differentially expressed in FDCP 6 homolog
1765	psites	tmt	0	1.00943	1.00361	0.157479	1.01307	0.0975923	0.928983	0.992868	S	597	___2	LKRLTRWGSQGNRTPSPNSNEQQKSLNGGDE	Q9H4E7	Q9H4E7	DEF6	Differentially expressed in FDCP 6 homolog
1766	psites	tmt	0	1.03084	0.881632	0.148243	0.90882	0.090953	0.740009	0.98231	S	540	___2	LIHRDRDWERERRLPSSPASPSPKGTPEKAN	Q9H4G0	Q9H4G0	EPB41L1	Band 4.1-like protein 1
1767	psites	tmt	0	0.873993	0.911127	0.0978592	0.796319	0.0659299	0.121813	0.834648	S	541	___2	IHRDRDWERERRLPSSPASPSPKGTPEKANE	Q9H4G0	Q9H4G0	EPB41L1	Band 4.1-like protein 1
1768	psites	tmt	0	1.03438	0.854139	0.0923873	0.883501	0.0896202	0.603165	0.941922	S	544	___2	DRDWERERRLPSSPASPSPKGTPEKANERAG	Q9H4G0	Q9H4G0	EPB41L1	Band 4.1-like protein 1
1769	psites	tmt	0	0.893334	0.986669	0.135749	0.881425	0.101354	0.245207	0.855001	S	124	___2	TVQEKTFNKDTVIIVSEPSEDEESQGLPTMA	Q9H4L7	Q9H4L7	SMARCAD1	SWI/SNF-related matrix-associated actin-dependent regulator of chromatin subfamily A containing DEAD/H box 1
1770	psites	tmt	0	0.893334	0.986669	0.135749	0.881425	0.101354	0.245207	0.855001	S	127	___2	EKTFNKDTVIIVSEPSEDEESQGLPTMARRN	Q9H4L7	Q9H4L7	SMARCAD1	SWI/SNF-related matrix-associated actin-dependent regulator of chromatin subfamily A containing DEAD/H box 1
1771	psites	tmt	0	1.01437	1.11253	0.0579157	1.12852	0.113419	0.891497	0.987496	S	657	___2	KKRLKRKQKALAEEASEEELPSDVDLNDPYF	Q9H501	Q9H501	ESF1	ESF1 homolog
1772	psites	tmt	0	0.970224	1.17892	0.152083	1.14382	0.0895252	0.809719	0.986664	S	663	___2	KQKALAEEASEEELPSDVDLNDPYFAEEVKQ	Q9H501	Q9H501	ESF1	ESF1 homolog
1773	psites	tmt	0	1.17195	1.04097	0.228408	1.21996	0.398928	0.645742	0.954394	S	58	___2	REPGSPPSVQRAGLGSPERPPKTSPGSPRLQ	Q9H6F5	Q9H6F5	CCDC86	Coiled-coil domain-containing protein 86
1774	psites	tmt	0	1.22565	1.02833	0.341238	1.26037	0.661019	0.862977	0.986664	S	69	___2	AGLGSPERPPKTSPGSPRLQQGAGLESPQGQ	Q9H6F5	Q9H6F5	CCDC86	Coiled-coil domain-containing protein 86
1775	psites	tmt	0	0.655997	1.26793	0.237557	0.83176	0.21883	0.210333	0.834648	S	102	___2	PGAASPQRQQDLHLESPQRQPEYSPESPRCQ	Q9H6F5	Q9H6F5	CCDC86	Coiled-coil domain-containing protein 86
1776	psites	tmt	0	1.01807	0.962538	0.161554	0.979927	0.109927	0.819242	0.986664	S	234	___2	DLRTLNKLKSPKRPASPSSPEHLPATPAESP	Q9H7L9	Q9H7L9	SUDS3	Sin3 histone deacetylase corepressor complex component SDS3
1777	psites	tmt	0	1.20469	0.882075	0.0205815	1.06263	0.412228	0.683258	0.967752	S	719	___2	TITVGRLDKSDPRGPSPAPASSPKREVLYDS	Q9H7N4	Q9H7N4	SCAF1	Splicing factor, arginine/serine-rich 19
1778	psites	tmt	0	0.938174	1.00275	0.113579	0.940758	0.0797104	0.410861	0.896798	S	498	___2	RRKILTQRRERYRQRSPSPAPAPAPAAAAGP	Q9H7N4	Q9H7N4	SCAF1	Splicing factor, arginine/serine-rich 19
1779	psites	tmt	0	0.938174	1.00275	0.113579	0.940758	0.0797104	0.410861	0.896798	S	500	___2	KILTQRRERYRQRSPSPAPAPAPAAAAGPPT	Q9H7N4	Q9H7N4	SCAF1	Splicing factor, arginine/serine-rich 19
1780	psites	tmt	0	0.85098	1.18352	0.0594813	1.00715	0.268864	0.459705	0.902495	S	144	___2	KEESHSNDQSPQIRASPSPQPSSQPLQIHRQ	Q9HC35	Q9HC35	EML4	Echinoderm microtubule-associated protein-like 4
1781	psites	tmt	0	0.900539	1.10343	0.155557	0.993682	0.180193	0.403534	0.89152	S	146	___2	ESHSNDQSPQIRASPSPQPSSQPLQIHRQTP	Q9HC35	Q9HC35	EML4	Echinoderm microtubule-associated protein-like 4
1782	psites	tmt	0	0.933595	1.08562	0.130445	1.01353	0.0648972	0.42173	0.896798	S	465	___2	KESPHFYRKGTTPPRSPEASPKHSHSPASSP	Q9HDC5	Q9HDC5	JPH1	Junctophilin-1
1783	psites	tmt	0	0.868639	0.971653	0.123772	0.844016	0.196286	0.467663	0.903236	S	165	___2	GMATVIRSPLRTSLASLRSEQSNGSVLHDAA	Q9HDC5	Q9HDC5	JPH1	Junctophilin-1
1784	psites	tmt	0	0.977392	1.01808	0.0456776	0.995064	0.172558	0.835838	0.986664	S	523	___2	QQTVTRSSDLERKASSPSPLTIGTPESQRKP	Q9NPI6	Q9NPI6	DCP1A	mRNA-decapping enzyme 1A
1785	psites	tmt	0	0.95681	1.03661	0.140408	0.991843	0.111427	0.710062	0.972075	S	525	___2	TVTRSSDLERKASSPSPLTIGTPESQRKPSI	Q9NPI6	Q9NPI6	DCP1A	mRNA-decapping enzyme 1A
1786	psites	tmt	0	0.990237	1.05404	0.379983	1.04374	0.219453	0.871705	0.986664	S	315	___2	TQSNEKHAPTYTIPLSPVLSPTLPAEAPTAQ	Q9NPI6	Q9NPI6	DCP1A	mRNA-decapping enzyme 1A
1787	psites	tmt	0	0.990237	1.05404	0.379983	1.04374	0.219453	0.871705	0.986664	S	319	___2	EKHAPTYTIPLSPVLSPTLPAEAPTAQVPPS	Q9NPI6	Q9NPI6	DCP1A	mRNA-decapping enzyme 1A
1788	psites	tmt	0	1.10787	0.907959	0.172066	1.0059	0.131488	0.351917	0.874972	S	181	___2	PAAPPSTPAAPKRRGSSGSVDETLFALPAAS	Q9NQC3	Q9NQC3	RTN4	Reticulon-4
1789	psites	tmt	0	0.888346	1.06926	0.0374659	0.949874	0.280754	0.566265	0.936012	S	55	___2	GIATLAVKRMYDRAISAPTSPTRLSHSGKRS	Q9NQG6	Q9NQG6	MIEF1	Mitochondrial dynamics protein MID51
1790	psites	tmt	0	1.12544	0.983758	0.0821954	1.10716	0.0399578	0.206035	0.834648	S	59	___2	LAVKRMYDRAISAPTSPTRLSHSGKRSWEEP	Q9NQG6	Q9NQG6	MIEF1	Mitochondrial dynamics protein MID51
1791	psites	tmt	0	1.1479	0.955942	0.164609	1.09732	0.180295	0.3129	0.858718	S	365	___2	SVSKTSAAACAVTDLSDDSDFDEKAKLKYYK	Q9NQZ2	Q9NQZ2	UTP3	Something about silencing protein 10
1792	psites	tmt	0	1.1479	0.955942	0.164609	1.09732	0.180295	0.3129	0.858718	S	368	___2	KTSAAACAVTDLSDDSDFDEKAKLKYYKEIE	Q9NQZ2	Q9NQZ2	UTP3	Something about silencing protein 10
1793	psites	tmt	0	1.11033	1.09022	0.544331	1.21051	0.0362219	0.694482	0.9695	S	975	___2	ACSTTEEVFNSPRAGSPLCNSNLQDSEEDIE	Q9NRY4	Q9NRY4	ARHGAP35	Rho GTPase-activating protein 35
1794	psites	tmt	0	1.11033	1.09022	0.544331	1.21051	0.0362219	0.694482	0.9695	S	985	___2	SPRAGSPLCNSNLQDSEEDIEPSYSLFREDT	Q9NRY4	Q9NRY4	ARHGAP35	Rho GTPase-activating protein 35
1795	psites	tmt	0	1.9154	0.810407	0.820246	1.55225	0.35117	0.365672	0.874972	S	864	___2	SDRETKHKRRKRKTRSLSVEIVYEGKATDTT	Q9NS56	Q9NS56	TOPORS	E3 ubiquitin-protein ligase Topors
1796	psites	tmt	0	1.9154	0.810407	0.820246	1.55225	0.35117	0.365672	0.874972	S	866	___2	RETKHKRRKRKTRSLSVEIVYEGKATDTTKH	Q9NS56	Q9NS56	TOPORS	E3 ubiquitin-protein ligase Topors
1797	psites	tmt	0	1.02527	1.15666	0.152606	1.18589	0.0406143	0.745286	0.98231	S	1358	___2	SKQHRVSRRAQQRAESPESSAIESTQSTPQK	Q9NTI5	Q9NTI5	PDS5B	Sister chromatid cohesion protein PDS5 homolog B
1798	psites	tmt	0	0.852054	1.14009	0.135574	0.97142	0.0875341	0.158886	0.834648	S	1383	___2	QSTPQKGRGRPSKTPSPSQPKKNVRVGRSKQ	Q9NTI5	Q9NTI5	PDS5B	Sister chromatid cohesion protein PDS5 homolog B
1799	psites	tmt	0	1.06538	0.999426	0.078924	1.06477	0.183985	0.591575	0.941922	S	422	___2	TLPRSKSPSGQKRSRSRSPHEAGFCVYLKGL	Q9NTZ6	Q9NTZ6	RBM12	RNA-binding protein 12
1800	psites	tmt	0	1.02291	1.03837	0.0833965	1.06217	0.226801	0.969229	1	S	424	___2	PRSKSPSGQKRSRSRSPHEAGFCVYLKGLPF	Q9NTZ6	Q9NTZ6	RBM12	RNA-binding protein 12
1801	psites	tmt	0	1.07447	0.977732	0.11619	1.05054	0.12541	0.433891	0.897566	S	420	___2	PQTLPRSKSPSGQKRSRSRSPHEAGFCVYLK	Q9NTZ6	Q9NTZ6	RBM12	RNA-binding protein 12
1802	psites	tmt	0	0.96593	0.964364	0.109987	0.931509	0.323424	0.700405	0.970383	S	470	___2	QETESLHGSSGKLTGSTSSLNKLSVQSSGNR	Q9NV70	Q9NV70	EXOC1	Exocyst complex component 1
1803	psites	tmt	0	0.954154	0.97471	0.114209	0.930023	0.323908	0.65346	0.958951	S	473	___2	ESLHGSSGKLTGSTSSLNKLSVQSSGNRRSQ	Q9NV70	Q9NV70	EXOC1	Exocyst complex component 1
1804	psites	tmt	0	0.551202	1.12399	0.0394577	0.619547	0.737247	0.322578	0.858718	S	161	___2	DAKHREREAANEAGDSSQDEAEDDVKQITVR	Q9NVU0	Q9NVU0	POLR3E	DNA-directed RNA polymerase III subunit RPC5
1805	psites	tmt	0	0.551202	1.12399	0.0394577	0.619547	0.737247	0.322578	0.858718	S	162	___2	AKHREREAANEAGDSSQDEAEDDVKQITVRF	Q9NVU0	Q9NVU0	POLR3E	DNA-directed RNA polymerase III subunit RPC5
1806	psites	tmt	0	0.947606	1.09418	0.123858	1.03685	0.30758	0.625544	0.948	S	86	___2	DMYGPEKFTDKDQQPSGSEGEDDDAEAALKK	Q9NXG2	Q9NXG2	THUMPD1	THUMP domain-containing protein 1
1807	psites	tmt	0	0.947606	1.09418	0.123858	1.03685	0.30758	0.625544	0.948	S	88	___2	YGPEKFTDKDQQPSGSEGEDDDAEAALKKEV	Q9NXG2	Q9NXG2	THUMPD1	THUMP domain-containing protein 1
1808	psites	tmt	0	1.35824	0.678912	0.102064	0.922125	0.118099	0.110007	0.834648	S	658	___2	STRQKSPEIHRRIDISPSTLRKHTRLAGEER	Q9NYF8	Q9NYF8	BCLAF1	Bcl-2-associated transcription factor 1
1809	psites	tmt	0	1.35824	0.678912	0.102064	0.922125	0.118099	0.110007	0.834648	S	660	___2	RQKSPEIHRRIDISPSTLRKHTRLAGEERVF	Q9NYF8	Q9NYF8	BCLAF1	Bcl-2-associated transcription factor 1
1810	psites	tmt	0	1.15944	0.893775	0.13661	1.03628	0.0502133	0.0764874	0.834648	S	681	___2	LTDLPLPPELPGGDLSPPDSPEPKAITPPQQ	Q9NYV4	Q9NYV4	CDK12	Cyclin-dependent kinase 12
1811	psites	tmt	0	1.15944	0.893775	0.13661	1.03628	0.0502133	0.0764874	0.834648	S	685	___2	PLPPELPGGDLSPPDSPEPKAITPPQQPYKK	Q9NYV4	Q9NYV4	CDK12	Cyclin-dependent kinase 12
1812	psites	tmt	0	0.990484	1.02544	0.0949484	1.01568	0.0452122	0.909318	0.989979	S	383	___2	SHSKKKRSSSRSRHSSISPVRLPLNSSLGAE	Q9NYV4	Q9NYV4	CDK12	Cyclin-dependent kinase 12
1813	psites	tmt	0	0.990484	1.02544	0.0949484	1.01568	0.0452122	0.909318	0.989979	S	385	___2	SKKKRSSSRSRHSSISPVRLPLNSSLGAELS	Q9NYV4	Q9NYV4	CDK12	Cyclin-dependent kinase 12
1814	psites	tmt	0	0.793881	1.08906	0.0202583	0.864587	0.0543688	0.0300365	0.834648	S	332	___2	GSYSGRSPSPYGRRRSSSPFLSKRSLSRSPL	Q9NYV4	Q9NYV4	CDK12	Cyclin-dependent kinase 12
1815	psites	tmt	0	0.794497	1.0844	0.0264285	0.861552	0.0595418	0.0376496	0.834648	S	334	___2	YSGRSPSPYGRRRSSSPFLSKRSLSRSPLPS	Q9NYV4	Q9NYV4	CDK12	Cyclin-dependent kinase 12
1816	psites	tmt	0	1.36662	1.05407	0.206169	1.44052	0.112414	0.19556	0.834648	S	575	___2	TRESNRKTDSRLVDVSPDRGSPPSRVPQALN	Q9NYZ3	Q9NYZ3	GTSE1	G2 and S phase-expressed protein 1
1817	psites	tmt	0	0.951093	0.95544	0.0536682	0.908713	0.245028	0.664667	0.960733	S	884	___2	VNTSWQKKSAFTRTVSPGSVSPIHGQGQVVE	Q9NZM3	Q9NZM3	ITSN2	Intersectin-2
1818	psites	tmt	0	0.707883	1.08798	0.119972	0.770164	0.257852	0.219288	0.835963	S	131	___2	EEPGAYWNGKLLRSHSQASLAGPGPVDPSNR	Q9P2M7	Q9P2M7	CGN	Cingulin
1819	psites	tmt	0	0.707883	1.08798	0.119972	0.770164	0.257852	0.219288	0.835963	S	134	___2	GAYWNGKLLRSHSQASLAGPGPVDPSNRSNS	Q9P2M7	Q9P2M7	CGN	Cingulin
1820	psites	tmt	0	0.887649	1.1548	0.0594624	1.02506	0.0898752	0.255477	0.855001	S	423	___2	LRSPRRLNSSPRAPVSPLKFSPFEGFRPSPS	Q9UBS0	Q9UBS0	RPS6KB2	Ribosomal protein S6 kinase beta-2
1821	psites	tmt	0	1.20392	0.882364	0.229549	1.0623	0.0863992	0.376689	0.879147	S	986	___2	AQMRRAASSDQLRDNSPPPAFKPEPPKAKTQ	Q9UDY2	Q9UDY2	TJP2	Tight junction protein ZO-2
1822	psites	tmt	0	1.38736	0.86328	0.130202	1.19768	0.171661	0.168181	0.834648	S	1067	___2	PSTPIPPQEGEEVGESSEEQDNAPKSVLGKV	Q9UDY2	Q9UDY2	TJP2	Tight junction protein ZO-2
1823	psites	tmt	0	1.38736	0.86328	0.130202	1.19768	0.171661	0.168181	0.834648	S	1068	___2	STPIPPQEGEEVGESSEEQDNAPKSVLGKVK	Q9UDY2	Q9UDY2	TJP2	Tight junction protein ZO-2
1824	psites	tmt	0	0.921584	1.01466	0.14969	0.935092	0.0778793	0.583511	0.937722	S	574	___2	SPAQGAQNEPPRLNASPAAREEATSPGAKDM	Q9UGU0	Q9UGU0	TCF20	Transcription factor 20
1825	psites	tmt	0	0.816479	1.35563	0.295676	1.10684	0.214898	0.400535	0.889074	S	369	___2	QPVHPKPLSPDSRASSLSESSPPKAMKKFQA	Q9UHB6	Q9UHB6	LIMA1	LIM domain and actin-binding protein 1
1826	psites	tmt	0	1.68725	0.670156	0.724718	1.13072	0.145743	0.364338	0.874972	S	703	___2	FRQRMFSPMEEKELLSPLSEPDDRYPLIVKI	Q9UHB7	Q9UHB7	AFF4	AF4/FMR2 family member 4
1827	psites	tmt	0	1.68725	0.670156	0.724718	1.13072	0.145743	0.364338	0.874972	S	706	___2	RMFSPMEEKELLSPLSEPDDRYPLIVKIDLN	Q9UHB7	Q9UHB7	AFF4	AF4/FMR2 family member 4
1828	psites	tmt	0	1.11888	0.901643	0.174293	1.00883	0.125996	0.300755	0.858718	S	775	___2	ELRTFSFSDDENKPPSPKEIRIEVAERLHLD	Q9UHJ3	Q9UHJ3	SFMBT1	Scm-like with four MBT domains protein 1
1829	psites	tmt	0	1.02722	0.938898	0.271044	0.964456	0.142124	0.816202	0.986664	S	18	___2	GKKNVLSSLAVYAEDSEPESDGEAGIEAVGS	Q9UHR5	Q9UHR5	SAP30BP	SAP30-binding protein
1830	psites	tmt	0	1.02722	0.938898	0.271044	0.964456	0.142124	0.816202	0.986664	S	22	___2	VLSSLAVYAEDSEPESDGEAGIEAVGSAAEE	Q9UHR5	Q9UHR5	SAP30BP	SAP30-binding protein
1831	psites	tmt	0	0.938799	0.992113	0.0834296	0.931394	0.223235	0.548353	0.936012	S	736	___2	EHASVMLDVPIRLTGSQLSITQVASIKQLRE	Q9UJF2	Q9UJF2	RASAL2	Ras GTPase-activating protein nGAP
1832	psites	tmt	0	0.934763	1.01671	0.106503	0.950383	0.234698	0.55661	0.936012	S	739	___2	SVMLDVPIRLTGSQLSITQVASIKQLRETQS	Q9UJF2	Q9UJF2	RASAL2	Ras GTPase-activating protein nGAP
1833	psites	tmt	0	0.957258	1.04551	0.102737	1.00082	0.0301062	0.545925	0.936012	S	335	___2	LNPDGTPALSTLGGFSPASKPSSPREVKAEE	Q9UK58	Q9UK58	CCNL1	Cyclin-L1
1834	psites	tmt	0	1.20462	0.8811	0.225264	1.06139	0.382951	0.554489	0.936012	S	338	___2	DGTPALSTLGGFSPASKPSSPREVKAEEKSP	Q9UK58	Q9UK58	CCNL1	Cyclin-L1
1835	psites	tmt	0	0.975183	1.02368	0.106288	0.998277	0.143115	0.764401	0.98551	S	769	___2	SSERTRVRANSKSEGSPVLPHEPAKVKPEES	Q9UKE5	Q9UKE5	TNIK	TRAF2 and NCK-interacting protein kinase
1836	psites	tmt	0	1.29446	0.916125	0.0775315	1.18589	0.122237	0.130078	0.834648	S	240	___2	ERRSSRVRQARAAKLSEGSQPAEEEEDQETP	Q9UKV3	Q9UKV3	ACIN1	Apoptotic chromatin condensation inducer in the nucleus
1837	psites	tmt	0	1.29446	0.916125	0.0775315	1.18589	0.122237	0.130078	0.834648	S	243	___2	SSRVRQARAAKLSEGSQPAEEEEDQETPSRN	Q9UKV3	Q9UKV3	ACIN1	Apoptotic chromatin condensation inducer in the nucleus
1838	psites	tmt	0	0.827965	1.00848	0.125223	0.834989	0.239438	0.215878	0.834648	S	410	___2	DRKKASLVALPEQTASEEETPPPLLTKEASS	Q9UKV3	Q9UKV3	ACIN1	Apoptotic chromatin condensation inducer in the nucleus
1839	psites	tmt	0	0.964025	1.02899	0.0735414	0.991975	0.197418	0.659446	0.9594	S	386	___2	EREIKSSQGLKEKSKSPSPPRLTEDRKKASL	Q9UKV3	Q9UKV3	ACIN1	Apoptotic chromatin condensation inducer in the nucleus
1840	psites	tmt	0	0.964025	1.02899	0.0735414	0.991975	0.197418	0.659446	0.9594	S	388	___2	EIKSSQGLKEKSKSPSPPRLTEDRKKASLVA	Q9UKV3	Q9UKV3	ACIN1	Apoptotic chromatin condensation inducer in the nucleus
1841	psites	tmt	0	1.02066	1.11248	0.111941	1.13547	0.148989	0.88145	0.986664	S	839	___2	KKRPPPPPPGHKRTLSDPPSPLPHGPPNKGA	Q9ULH1	Q9ULH1	ASAP1	Arf-GAP with SH3 domain, ANK repeat and PH domain-containing protein 1
1842	psites	tmt	0	1.02066	1.11248	0.111941	1.13547	0.148989	0.88145	0.986664	S	843	___2	PPPPPGHKRTLSDPPSPLPHGPPNKGAVPWG	Q9ULH1	Q9ULH1	ASAP1	Arf-GAP with SH3 domain, ANK repeat and PH domain-containing protein 1
1843	psites	tmt	0	0.720327	1.04547	0.0772461	0.753079	0.361975	0.187817	0.834648	S	747	___2	ETAAVCGETDEEAGESGGEGIFRERDEFVIR	Q9ULL5	Q9ULL5	PRR12	Proline-rich protein 12
1844	psites	tmt	0	0.998658	0.96096	0.109164	0.959671	0.04882	0.978814	1	S	560	___2	LDEELKRNLETLPSFSSDEEDSVAKNRDLQE	Q9ULL5	Q9ULL5	PRR12	Proline-rich protein 12
1845	psites	tmt	0	0.998658	0.96096	0.109164	0.959671	0.04882	0.978814	1	S	561	___2	DEELKRNLETLPSFSSDEEDSVAKNRDLQES	Q9ULL5	Q9ULL5	PRR12	Proline-rich protein 12
1846	psites	tmt	0	0.919242	0.886188	0.132759	0.814622	0.096862	0.430222	0.897566	S	707	___2	GKDETDSPTVHLGLDSDSESELVIDLGEDHS	Q9ULU4	Q9ULU4	ZMYND8	Protein kinase C-binding protein 1
1847	psites	tmt	0	0.919242	0.886188	0.132759	0.814622	0.096862	0.430222	0.897566	S	709	___2	DETDSPTVHLGLDSDSESELVIDLGEDHSGR	Q9ULU4	Q9ULU4	ZMYND8	Protein kinase C-binding protein 1
1848	psites	tmt	0	1.45916	0.870851	0.250701	1.27071	0.331648	0.123667	0.834648	S	486	___2	KSTASPASTKTGQAGSLSGSPKPFSPQLSAP	Q9ULU4	Q9ULU4	ZMYND8	Protein kinase C-binding protein 1
1849	psites	tmt	0	1.13424	1.00383	0.138471	1.13859	0.082535	0.236118	0.845101	S	490	___2	SPASTKTGQAGSLSGSPKPFSPQLSAPITTK	Q9ULU4	Q9ULU4	ZMYND8	Protein kinase C-binding protein 1
1850	psites	tmt	0	0.959626	1.13912	0.332377	1.09313	0.0727351	0.959262	0.999014	S	495	___2	KTGQAGSLSGSPKPFSPQLSAPITTKTDKTS	Q9ULU4	Q9ULU4	ZMYND8	Protein kinase C-binding protein 1
1851	psites	tmt	0	0.873351	1.09085	0.105289	0.952691	0.186277	0.315818	0.858718	S	121	___2	EAAISRKTPAQPQRRSLRLSAQKDLEQKEKH	Q9ULW0	Q9ULW0	TPX2	Targeting protein for Xklp2
1852	psites	tmt	0	0.873351	1.09085	0.105289	0.952691	0.186277	0.315818	0.858718	S	125	___2	SRKTPAQPQRRSLRLSAQKDLEQKEKHHVKM	Q9ULW0	Q9ULW0	TPX2	Targeting protein for Xklp2
1853	psites	tmt	0	0.795321	1.09805	0.0763749	0.8733	0.565224	0.537746	0.935076	S	172	___2	ELDDVKRLLKGSRSASVSPTRNSSNTLPIPK	Q9UMD9	Q9UMD9	COL17A1	Collagen alpha-1(XVII) chain;120 kDa linear IgA disease antigen;97 kDa linear IgA disease antigen
1854	psites	tmt	0	1.31902	0.933078	0.239996	1.23075	0.319436	0.452431	0.902495	S	1092	___2	RRCVKQRPSYDIFEDSDDSEPGGPPAPRRRT	Q9UMN6	Q9UMN6	KMT2B	Histone-lysine N-methyltransferase 2B
1855	psites	tmt	0	1.31902	0.933078	0.239996	1.23075	0.319436	0.452431	0.902495	S	1095	___2	VKQRPSYDIFEDSDDSEPGGPPAPRRRTPRE	Q9UMN6	Q9UMN6	KMT2B	Histone-lysine N-methyltransferase 2B
1856	psites	tmt	0	0.994138	1.10487	0.0461979	1.0984	0.0527417	0.887304	0.98688	S	332	___2	MASSCMTRLSRSRTASLTSAASVDGNRSRSR	Q9UN36	Q9UN36	NDRG2	Protein NDRG2
1857	psites	tmt	0	0.924927	1.0941	0.143597	1.01196	0.131686	0.4701	0.904667	S	1659	___2	RPPKKRHEDLVPPAGSPELSPPQPLFRPRSE	Q9UPS6	Q9UPS6	SETD1B	Histone-lysine N-methyltransferase SETD1B
1858	psites	tmt	0	0.924927	1.0941	0.143597	1.01196	0.131686	0.4701	0.904667	S	1663	___2	KRHEDLVPPAGSPELSPPQPLFRPRSEFEEM	Q9UPS6	Q9UPS6	SETD1B	Histone-lysine N-methyltransferase SETD1B
1859	psites	tmt	0	0.94536	1.19731	0.0945122	1.13189	0.31158	0.768065	0.98551	S	312	___2	GTVRTGNRTLFEDRDSDSQDEVVVESLPTTS	Q9UPS8	Q9UPS8	ANKRD26	Ankyrin repeat domain-containing protein 26
1860	psites	tmt	0	0.94536	1.19731	0.0945122	1.13189	0.31158	0.768065	0.98551	S	314	___2	VRTGNRTLFEDRDSDSQDEVVVESLPTTSIK	Q9UPS8	Q9UPS8	ANKRD26	Ankyrin repeat domain-containing protein 26
1861	psites	tmt	0	0.9278	1.01518	0.0787666	0.941884	0.212937	0.448266	0.902495	S	454	___2	ESPKPAPAPGSHREISSSPTSKNRSHGRAKR	Q9UQ35	Q9UQ35	SRRM2	Serine/arginine repetitive matrix protein 2
1862	psites	tmt	0	0.787365	1.05095	0.012132	0.827483	0.0997845	0.076991	0.834648	S	455	___2	SPKPAPAPGSHREISSSPTSKNRSHGRAKRD	Q9UQ35	Q9UQ35	SRRM2	Serine/arginine repetitive matrix protein 2
1863	psites	tmt	0	0.936113	1.01036	0.072622	0.945807	0.208835	0.483651	0.906234	S	456	___2	PKPAPAPGSHREISSSPTSKNRSHGRAKRDK	Q9UQ35	Q9UQ35	SRRM2	Serine/arginine repetitive matrix protein 2
1864	psites	tmt	0	1.04951	0.940327	0.200536	0.98688	0.104759	0.632603	0.95048	S	1320	___2	WGGPHFSPEHKELSNSPLRENSFGSPLEFRN	Q9UQ35	Q9UQ35	SRRM2	Serine/arginine repetitive matrix protein 2
1865	psites	tmt	0	1.06159	0.928102	0.18911	0.985261	0.108503	0.570051	0.936012	S	1326	___2	SPEHKELSNSPLRENSFGSPLEFRNSGPLGT	Q9UQ35	Q9UQ35	SRRM2	Serine/arginine repetitive matrix protein 2
1866	psites	tmt	0	1.07728	0.890978	0.0948137	0.959831	0.0846382	0.492815	0.910559	S	1329	___2	HKELSNSPLRENSFGSPLEFRNSGPLGTEMN	Q9UQ35	Q9UQ35	SRRM2	Serine/arginine repetitive matrix protein 2
1867	psites	tmt	0	0.73091	1.41641	0.285611	1.03527	0.600614	0.270788	0.855969	S	377	___2	EPPAPTPLLAERHGGSPQPLATTPLSQEPVN	Q9UQ35	Q9UQ35	SRRM2	Serine/arginine repetitive matrix protein 2
1868	psites	tmt	0	0.828019	1.14825	0.0815265	0.950777	0.348679	0.486779	0.907808	S	857	___2	PKVKSGTPPRQGSITSPQANEQSVTPQRRSC	Q9UQ35	Q9UQ35	SRRM2	Serine/arginine repetitive matrix protein 2
1869	psites	tmt	0	0.781196	0.98949	0.0520482	0.772986	0.310488	0.353678	0.874972	S	1081	___2	DHRSDTSSPEVRQSHSESPSLQSKSQTSPKG	Q9UQ35	Q9UQ35	SRRM2	Serine/arginine repetitive matrix protein 2
1870	psites	tmt	0	0.781196	0.98949	0.0520482	0.772986	0.310488	0.353678	0.874972	S	1083	___2	RSDTSSPEVRQSHSESPSLQSKSQTSPKGGR	Q9UQ35	Q9UQ35	SRRM2	Serine/arginine repetitive matrix protein 2
1871	psites	tmt	0	1.36979	0.846274	0.0993686	1.15922	0.293354	0.138753	0.834648	S	351	___2	EDKDKDKKEKSATRPSPSPERSSTGPEPPAP	Q9UQ35	Q9UQ35	SRRM2	Serine/arginine repetitive matrix protein 2
1872	psites	tmt	0	1.16517	0.949011	0.0848538	1.10576	0.331973	0.50393	0.913915	S	353	___2	KDKDKKEKSATRPSPSPERSSTGPEPPAPTP	Q9UQ35	Q9UQ35	SRRM2	Serine/arginine repetitive matrix protein 2
1873	psites	tmt	0	0.834937	1.02455	0.0138467	0.855438	0.0118212	0.00505522	0.723135	S	1542	___2	TVARTPLGQRSRSGSSQELDVKPSASPQERS	Q9UQ35	Q9UQ35	SRRM2	Serine/arginine repetitive matrix protein 2
1874	psites	tmt	0	0.990135	1.10913	0.0687951	1.09819	0.362598	0.768679	0.98551	S	778	___2	SSPRSKAKSRLSLRRSLSGSSPCPKQKSQTP	Q9UQ35	Q9UQ35	SRRM2	Serine/arginine repetitive matrix protein 2
1875	psites	tmt	0	0.844377	1.09776	0.291921	0.926925	0.159125	0.496099	0.910559	S	780	___2	PRSKAKSRLSLRRSLSGSSPCPKQKSQTPPR	Q9UQ35	Q9UQ35	SRRM2	Serine/arginine repetitive matrix protein 2
1876	psites	tmt	0	0.806164	1.04678	0.0643257	0.843873	0.0385555	0.0559461	0.834648	S	783	___2	KAKSRLSLRRSLSGSSPCPKQKSQTPPRRSR	Q9UQ35	Q9UQ35	SRRM2	Serine/arginine repetitive matrix protein 2
1877	psites	tmt	0	0.620635	1.33735	0.322553	0.830004	0.143708	0.214281	0.834648	S	2692	___2	SPRKPIDSLRDSRSLSYSPVERRRPSPQPSP	Q9UQ35	Q9UQ35	SRRM2	Serine/arginine repetitive matrix protein 2
1878	psites	tmt	0	0.918086	1.03029	0.00279121	0.945896	0.0471698	0.123609	0.834648	S	2694	___2	RKPIDSLRDSRSLSYSPVERRRPSPQPSPRD	Q9UQ35	Q9UQ35	SRRM2	Serine/arginine repetitive matrix protein 2
1879	psites	tmt	0	1.04784	0.941762	0.187952	0.986812	0.0877789	0.67276	0.962315	S	1499	___2	PEPKALPQTPRPRSRSPSSPELNNKCLTPQR	Q9UQ35	Q9UQ35	SRRM2	Serine/arginine repetitive matrix protein 2
1880	psites	tmt	0	1.15446	0.875392	0.217442	1.01061	0.106617	0.469112	0.904667	S	1501	___2	PKALPQTPRPRSRSPSSPELNNKCLTPQRER	Q9UQ35	Q9UQ35	SRRM2	Serine/arginine repetitive matrix protein 2
1881	psites	tmt	0	1.02417	0.96425	0.0473162	0.987559	0.0835156	0.658317	0.9594	S	820	___2	KAKSRTPPRRSRSSSSPPPKQKSKTPSRQSH	Q9UQ35	Q9UQ35	SRRM2	Serine/arginine repetitive matrix protein 2
1882	psites	tmt	0	0.98578	0.923882	0.201457	0.910744	0.444704	0.788339	0.986664	S	2032	___2	RSRSRTPPAIRRRSRSRTPLLPRKRSRSRSP	Q9UQ35	Q9UQ35	SRRM2	Serine/arginine repetitive matrix protein 2
1883	psites	tmt	0	1.19187	0.963564	0.257748	1.14844	0.77123	0.984889	1	S	1854	___2	RGRSRTPPTSRKRSRSRTSPAPWKRSRSRAS	Q9UQ35	Q9UQ35	SRRM2	Serine/arginine repetitive matrix protein 2
1884	psites	tmt	0	1.11453	1.00939	0.292984	1.125	0.796785	0.883569	0.986664	S	1857	___2	SRTPPTSRKRSRSRTSPAPWKRSRSRASPAT	Q9UQ35	Q9UQ35	SRRM2	Serine/arginine repetitive matrix protein 2
1885	psites	tmt	0	1.20886	0.885091	0.102498	1.06995	0.137898	0.135449	0.834648	S	1103	___2	SKSQTSPKGGRSRSSSPVTELASRSPIRQDR	Q9UQ35	Q9UQ35	SRRM2	Serine/arginine repetitive matrix protein 2
1886	psites	tmt	0	1.03779	0.960968	0.0661645	0.997287	0.147993	0.705688	0.97161	S	1110	___2	KGGRSRSSSPVTELASRSPIRQDRGEFSASP	Q9UQ35	Q9UQ35	SRRM2	Serine/arginine repetitive matrix protein 2
1887	psites	tmt	0	0.931799	0.991295	0.151138	0.923688	0.143411	0.528414	0.930181	S	295	___2	RSAAAKTHTTALAGRSPSPASGRRGEGDAPF	Q9UQ35	Q9UQ35	SRRM2	Serine/arginine repetitive matrix protein 2
1888	psites	tmt	0	0.931799	0.991295	0.151138	0.923688	0.143411	0.528414	0.930181	S	297	___2	AAAKTHTTALAGRSPSPASGRRGEGDAPFSE	Q9UQ35	Q9UQ35	SRRM2	Serine/arginine repetitive matrix protein 2
1889	psites	tmt	0	1.50085	0.814767	0.128231	1.22284	0.303021	0.101618	0.834648	S	1903	___2	SCSSPAVSAVSQLPLSPKETVESHDKAIANA	Q9Y2F5	Q9Y2F5	ICE1	Little elongation complex subunit 1
1890	psites	tmt	0	0.989809	1.05379	0.0370996	1.04305	0.0181311	0.70209	0.970383	S	132	___2	HPLKAVPIAVADEGESESEDDDLKPRGLTGM	Q9Y2K6	Q9Y2K6	USP20	Ubiquitin carboxyl-terminal hydrolase 20
1891	psites	tmt	0	0.989809	1.05379	0.0370996	1.04305	0.0181311	0.70209	0.970383	S	134	___2	LKAVPIAVADEGESESEDDDLKPRGLTGMKN	Q9Y2K6	Q9Y2K6	USP20	Ubiquitin carboxyl-terminal hydrolase 20
1892	psites	tmt	0	1.07303	0.903529	0.138931	0.969517	0.160324	0.536131	0.934541	S	30	___2	QASVGLLDTPRSRERSPSPLRGNVVPSPLPT	Q9Y2V2	Q9Y2V2	CARHSP1	Calcium-regulated heat stable protein 1
1893	psites	tmt	0	1.07303	0.903529	0.138931	0.969517	0.160324	0.536131	0.934541	S	32	___2	SVGLLDTPRSRERSPSPLRGNVVPSPLPTRR	Q9Y2V2	Q9Y2V2	CARHSP1	Calcium-regulated heat stable protein 1
1894	psites	tmt	0	1.00113	0.916986	0.106226	0.918022	0.310081	0.884606	0.986664	S	243	___2	YGTGSASRASAVSELSPRERSPALKSPLQSV	Q9Y2W1	Q9Y2W1	THRAP3	Thyroid hormone receptor-associated protein 3
1895	psites	tmt	0	1.09416	0.902383	0.0755336	0.987356	0.0995041	0.200714	0.834648	S	248	___2	ASRASAVSELSPRERSPALKSPLQSVVVRRR	Q9Y2W1	Q9Y2W1	THRAP3	Thyroid hormone receptor-associated protein 3
1896	psites	tmt	0	1.08907	0.921121	0.0764521	1.00317	0.110056	0.267085	0.855969	S	253	___2	AVSELSPRERSPALKSPLQSVVVRRRSPRPS	Q9Y2W1	Q9Y2W1	THRAP3	Thyroid hormone receptor-associated protein 3
1897	psites	tmt	0	0.898487	1.14491	0.141319	1.02868	0.112858	0.366295	0.874972	S	502	___2	KKKRGKKKHIKEEPLSEEEPCTSTAIASPEK	Q9Y2X3	Q9Y2X3	NOP58	Nucleolar protein 58
1898	psites	tmt	0	0.898487	1.14491	0.141319	1.02868	0.112858	0.366295	0.874972	S	514	___2	EPLSEEEPCTSTAIASPEKKKKKKKKRENED	Q9Y2X3	Q9Y2X3	NOP58	Nucleolar protein 58
1899	psites	tmt	0	1.05945	1.05337	0.104851	1.116	0.27434	0.844404	0.986664	S	410	___2	EPLRSTGATRSNRARSMDSSDLSDGAVTLQE	Q9Y2X7	Q9Y2X7	GIT1	ARF GTPase-activating protein GIT1
1900	psites	tmt	0	1.05945	1.05337	0.104851	1.116	0.27434	0.844404	0.986664	S	413	___2	RSTGATRSNRARSMDSSDLSDGAVTLQEYLE	Q9Y2X7	Q9Y2X7	GIT1	ARF GTPase-activating protein GIT1
1901	psites	tmt	0	1.07713	0.957769	0.0202679	1.03164	0.0319692	0.00772787	0.723135	S	672	___2	KDEDRKQFKDLFDLNSSEEDDTEGFSERGIL	Q9Y3T9	Q9Y3T9	NOC2L	Nucleolar complex protein 2 homolog
1902	psites	tmt	0	1.07713	0.957769	0.0202679	1.03164	0.0319692	0.00772787	0.723135	S	673	___2	DEDRKQFKDLFDLNSSEEDDTEGFSERGILR	Q9Y3T9	Q9Y3T9	NOC2L	Nucleolar complex protein 2 homolog
1903	psites	tmt	0	0.801683	1.28918	0.0254523	1.03351	0.0705712	0.052649	0.834648	S	49	___2	NSPQAETREAREAARSPDKPGGSPSASRRKG	Q9Y3T9	Q9Y3T9	NOC2L	Nucleolar complex protein 2 homolog
1904	psites	tmt	0	0.952958	0.965575	0.00762936	0.920153	0.213852	0.733039	0.978777	S	180	___2	HERGGVGSRADYDTLSLRSLRLGPGGLDDRY	Q9Y446	Q9Y446	PKP3	Plakophilin-3
1905	psites	tmt	0	0.952958	0.965575	0.00762936	0.920153	0.213852	0.733039	0.978777	S	183	___2	GGVGSRADYDTLSLRSLRLGPGGLDDRYSLV	Q9Y446	Q9Y446	PKP3	Plakophilin-3
1906	psites	tmt	0	0.941064	1.02297	0.143252	0.962681	0.0557826	0.557666	0.936012	S	196	___2	LRSLRLGPGGLDDRYSLVSEQLEPAATSTYR	Q9Y446	Q9Y446	PKP3	Plakophilin-3
1907	psites	tmt	0	0.941064	1.02297	0.143252	0.962681	0.0557826	0.557666	0.936012	S	199	___2	LRLGPGGLDDRYSLVSEQLEPAATSTYRAFA	Q9Y446	Q9Y446	PKP3	Plakophilin-3
1908	psites	tmt	0	1.10802	0.76649	0.115689	0.849283	0.248842	0.62255	0.948	S	313	___2	HGFNSYGSHRTLQRLSSGFDDIDLPSAVKYL	Q9Y446	Q9Y446	PKP3	Plakophilin-3
1909	psites	tmt	0	1.10802	0.76649	0.115689	0.849283	0.248842	0.62255	0.948	S	314	___2	GFNSYGSHRTLQRLSSGFDDIDLPSAVKYLM	Q9Y446	Q9Y446	PKP3	Plakophilin-3
1910	psites	tmt	0	0.951152	1.0288	0.119321	0.978549	0.0012062	0.637591	0.952382	S	75	___2	KSPRAALDGGVASAASPESKPSPGTKGQLRG	Q9Y4K1	Q9Y4K1	AIM1	Absent in melanoma 1 protein
1911	psites	tmt	0	1.01545	1.10022	0.326977	1.11722	0.350612	0.974677	1	S	275	___2	PGNPSRARSWLSPRVSPPASPGP________	Q9Y4U1	Q9Y4U1	MMACHC	Methylmalonic aciduria and homocystinuria type C protein
1912	psites	tmt	0	1.01545	1.10022	0.326977	1.11722	0.350612	0.974677	1	S	279	___2	SRARSWLSPRVSPPASPGP____________	Q9Y4U1	Q9Y4U1	MMACHC	Methylmalonic aciduria and homocystinuria type C protein
1913	psites	tmt	0	0.979382	1.128	0.0872423	1.10475	0.411555	0.855538	0.986664	S	187	___2	PPNVACWRDGGKAAGSPSSSDQDEKLPGQDE	Q9Y520	Q9Y520	PRRC2C	Protein PRRC2C
1914	psites	tmt	0	1.05338	0.975805	0.187188	1.02789	0.0159831	0.693822	0.9695	S	210	___2	AWAETTKRKTSSDDESEEDEDDLLQRTGNFI	Q9Y5J1	Q9Y5J1	UTP18	U3 small nucleolar RNA-associated protein 18 homolog
1915	psites	tmt	0	0.982833	0.93674	0.25536	0.920659	0.263127	0.921435	0.991803	S	121	___2	LLRRLRGPRVQEHEDSGDSEVENEAKGNFPP	Q9Y5J1	Q9Y5J1	UTP18	U3 small nucleolar RNA-associated protein 18 homolog
1916	psites	tmt	0	0.982833	0.93674	0.25536	0.920659	0.263127	0.921435	0.991803	S	124	___2	RLRGPRVQEHEDSGDSEVENEAKGNFPPQKK	Q9Y5J1	Q9Y5J1	UTP18	U3 small nucleolar RNA-associated protein 18 homolog
1917	psites	tmt	0	0.968509	1.05023	0.0674842	1.01716	0.0852853	0.567894	0.936012	S	510	___2	KMPGRRLPGRFNGGHSPTHSPEKILKLPKEE	Q9Y5K6	Q9Y5K6	CD2AP	CD2-associated protein
1918	psites	tmt	0	0.968509	1.05023	0.0674842	1.01716	0.0852853	0.567894	0.936012	S	514	___2	RRLPGRFNGGHSPTHSPEKILKLPKEEDSAN	Q9Y5K6	Q9Y5K6	CD2AP	CD2-associated protein
1919	psites	tmt	0	0.972592	1.02638	0.0771746	0.998244	0.117996	0.678882	0.967669	S	149	___2	DLTKDRSLTGKLEPVSPPSPPHTDPELELVP	Q9Y618	Q9Y618	NCOR2	Nuclear receptor corepressor 2
1920	psites	tmt	0	0.972592	1.02638	0.0771746	0.998244	0.117996	0.678882	0.967669	S	152	___2	KDRSLTGKLEPVSPPSPPHTDPELELVPPRL	Q9Y618	Q9Y618	NCOR2	Nuclear receptor corepressor 2
1921	psites	tmt	0	1.05329	0.96101	0.0790309	1.01222	0.0770791	0.574288	0.936012	S	725	___2	PSPKVIKTPVVKKTESPIKLSPATPSRKRSV	Q9Y6X9	Q9Y6X9	MORC2	MORC family CW-type zinc finger protein 2
1922	psites	tmt	0	0.936052	1.10515	0.0528641	1.03448	0.0833791	0.298634	0.858718	T	151	___2	TDLNKRASLPAGLVGTPPESPSEPREDVLGF	A6NDB9	A6NDB9	PALM3	Paralemmin-3
1923	psites	tmt	0	2.21462	0.629021	0.142694	1.39304	0.00514175	0.0156538	0.768492	T	18	___2	SKRTKTKTKKRPQRATSNVFAMFDQSQIQEF	P19105	P19105	MYL12A;MYL12B;MYL9	Myosin regulatory light chain 12A;Myosin regulatory light chain 12B;Myosin regulatory light polypeptide 9
1924	psites	tmt	0	0.859324	1.05764	0.141718	0.908856	0.163584	0.289845	0.858718	T	668	___2	SSSTSSLSTRSLENPTPPFTPKMGRRSIESP	O15085	O15085	ARHGEF11	Rho guanine nucleotide exchange factor 11
1925	psites	tmt	0	0.859324	1.05764	0.141718	0.908856	0.163584	0.289845	0.858718	T	672	___2	SSLSTRSLENPTPPFTPKMGRRSIESPSLGF	O15085	O15085	ARHGEF11	Rho guanine nucleotide exchange factor 11
1926	psites	tmt	0	0.726439	1.11692	0.108454	0.811376	0.220512	0.0863157	0.834648	T	81	___2	ATGKEMPQDLRSPARTPPSEEDSAEAERLKT	O43765	O43765	SGTA	Small glutamine-rich tetratricopeptide repeat-containing protein alpha
1927	psites	tmt	0	1.04732	0.887462	0.11012	0.929458	0.382343	0.91561	0.991742	T	113	___2	QTELFAHFIQPAAQKTPTSPLKMKPGRPRIK	O60264	O60264	SMARCA5	SWI/SNF-related matrix-associated actin-dependent regulator of chromatin subfamily A member 5
1928	psites	tmt	0	0.927515	1.0244	0.120659	0.950143	0.131649	0.431792	0.897566	T	244	___2	SLRWDETPGRAKGSETPGATPGSKIWDPTPS	O75533	O75533	SF3B1	Splicing factor 3B subunit 1
1929	psites	tmt	0	0.927515	1.0244	0.120659	0.950143	0.131649	0.431792	0.897566	T	248	___2	DETPGRAKGSETPGATPGSKIWDPTPSHTPA	O75533	O75533	SF3B1	Splicing factor 3B subunit 1
1930	psites	tmt	0	0.854795	1.03575	0.0899835	0.885354	0.0940639	0.101696	0.834648	T	223	___2	PGATPKKLSSWDQAETPGHTPSLRWDETPGR	O75533	O75533	SF3B1	Splicing factor 3B subunit 1
1931	psites	tmt	0	0.854795	1.03575	0.0899835	0.885354	0.0940639	0.101696	0.834648	T	227	___2	PKKLSSWDQAETPGHTPSLRWDETPGRAKGS	O75533	O75533	SF3B1	Splicing factor 3B subunit 1
1932	psites	tmt	0	1.09623	0.880218	0.154049	0.964924	0.225131	0.641704	0.953702	T	207	___2	PPSKRKRRWDQTADQTPGATPKKLSSWDQAE	O75533	O75533	SF3B1	Splicing factor 3B subunit 1
1933	psites	tmt	0	1.09623	0.880218	0.154049	0.964924	0.225131	0.641704	0.953702	T	211	___2	RKRRWDQTADQTPGATPKKLSSWDQAETPGH	O75533	O75533	SF3B1	Splicing factor 3B subunit 1
1934	psites	tmt	0	0.909759	1.17581	0.0674114	1.0697	0.0239185	0.205706	0.834648	T	993	___2	YLVIQGDERMHLPSPTDSNFYRALMDEEDMD	P00533	P00533	EGFR	Epidermal growth factor receptor
1935	psites	tmt	0	0.87562	1.12209	0.425422	0.982521	0.439585	0.756629	0.98551	T	1041	___2	SPSTSRTPLLSSLSATSNNSTVACIDRNGLQ	P00533	P00533	EGFR	Epidermal growth factor receptor
1936	psites	tmt	0	1.14862	1.08381	0.111778	1.24489	0.0636231	0.0785597	0.834648	T	58	___2	PAPSEDIWKKFELLPTPPLSPSRRSGLCSPS	P01106	P01106	MYC;MYCN	Myc proto-oncogene protein;N-myc proto-oncogene protein
1937	psites	tmt	0	1.26853	1.01663	0.218648	1.28962	0.172091	0.187674	0.834648	T	821	___2	ISPLKSPYKISEGLPTPTKMTPRSRILVSIG	P06400	P06400	RB1	Retinoblastoma-associated protein
1938	psites	tmt	0	0.967641	1.11019	0.0958	1.07427	0.104605	0.656133	0.958951	T	252	___2	EPYKTAVIPINGSPRTPRRGQNRSARIAKQL	P06400	P06400	RB1	Retinoblastoma-associated protein
1939	psites	tmt	0	1.00915	1.13881	0.0823171	1.14923	0.0383972	0.812737	0.986664	T	14	___2	__MEDYTKIEKIGEGTYGVVYKGRHKTTGQV	P06493	P06493	CDK1;CDK2;CDK3	Cyclin-dependent kinase 1;Cyclin-dependent kinase 2;Cyclin-dependent kinase 3
1940	psites	tmt	0	1.06584	1.1058	0.212057	1.17861	0.169478	0.639222	0.953638	T	60	___2	AIPAKKAPAGQEEPGTPPSSPLSAEQLDRIQ	P13051	P13051	UNG	Uracil-DNA glycosylase
1941	psites	tmt	0	1.08086	1.03194	0.22811	1.11538	0.0438576	0.442107	0.897566	T	1455	___2	EHLVNGRMDFAFPGSTNSLHRMTTTSAAAYG	P16144	P16144	ITGB4	Integrin beta-4
1942	psites	tmt	0	1.0772	0.937203	0.0339085	1.00956	0.129696	0.358202	0.874972	T	20	___2	TPVPPRMGSRAGGPTTPLSPTRLSRLQEKEE	P20700	P20700	LMNB1	Lamin-B1
1943	psites	tmt	0	1.054	1.00168	0.207777	1.05577	0.115519	0.618341	0.948	T	595	___2	DFGLAREYGSPLKAYTPVVVTLWYRAPELLL	P21127	P21127	CDK11B	Cyclin-dependent kinase 11B
1944	psites	tmt	0	1.53896	0.772572	0.183543	1.18896	0.302243	0.242032	0.85307	T	1919	___2	PTSPKYSPTSPTYSPTSPKYSPTSPTYSPTS	P24928	P24928	POLR2A	DNA-directed RNA polymerase II subunit RPB1
1945	psites	tmt	0	1.42341	0.8658	0.0479335	1.23238	0.206348	0.15089	0.834648	T	722	___2	PYDFSDTEEEMPQVHTPKTADSQETKESQKV	P25205	P25205	MCM3	DNA replication licensing factor MCM3
1946	psites	tmt	0	0.913844	1.10697	0.122625	1.0116	0.119101	0.331968	0.866244	T	202	___2	LARIADPEHDHTGFLTEYVATRWYRAPEIML	P27361	P27361	MAPK3	Mitogen-activated protein kinase 3
1947	psites	tmt	0	0.896297	1.42191	0.274767	1.27446	0.0888233	0.625309	0.948	T	185	___2	LARVADPDHDHTGFLTEYVATRWYRAPEIML	P28482	P28482	MAPK1	Mitogen-activated protein kinase 1
1948	psites	tmt	0	1.0389	0.959798	0.148207	0.997136	0.0358691	0.727346	0.977557	T	479	___2	ERRPHFPQFSYSASGTA______________	P31749	P31749	AKT1	RAC-alpha serine/threonine-protein kinase
1949	psites	tmt	0	1.1591	0.941944	0.154772	1.09181	0.0606062	0.102519	0.834648	T	18	___2	ETPAQCSIKQERISYTPPESPVPSYASSTPL	P41212	P41212	ETV6	Transcription factor ETV6
1950	psites	tmt	0	1.99024	0.703321	0.00191396	1.39977	0.568505	0.294287	0.858718	T	160	___2	KLLKLREQGTESRSSTPLPTISSSAENTRQN	P42166;P42167	P42167	TMPO	Lamina-associated polypeptide 2, isoform alpha;Thymopoietin;Thymopentin;Lamina-associated polypeptide 2, isoforms beta/gamma;Thymopoietin;Thymopentin
1951	psites	tmt	0	1.03514	0.970423	0.0857719	1.00453	0.0881574	0.60146	0.941922	T	74	___2	SKGPPDFSSDEEREPTPVLGSGAAAAGRSRA	P42166;P42167	P42167	TMPO	Lamina-associated polypeptide 2, isoform alpha;Thymopoietin;Thymopentin;Lamina-associated polypeptide 2, isoforms beta/gamma;Thymopoietin;Thymopentin
1952	psites	tmt	0	0.882304	1.09902	0.131868	0.969673	0.176221	0.284746	0.855969	T	1869	___2	TKKILCKSPQSDPADTPTNTKQRPKRSLKKA	P46013	P46013	MKI67	Antigen KI-67
1953	psites	tmt	0	1.00664	1.01029	0.134769	1.017	0.0806469	0.891255	0.987496	T	1396	___2	SNKELVGPPLAETVFTPKTSPENVQDRFALV	P49792	P49792	RANBP2	E3 SUMO-protein ligase RanBP2
1954	psites	tmt	0	1.20435	0.890027	0.0656897	1.0719	0.077255	0.033024	0.834648	T	177	___2	SLLGDSAPTLHLNKGTPSQSPVVGRSQGQQQ	P52594	P52594	AGFG1	Arf-GAP domain and FG repeat-containing protein 1
1955	psites	tmt	0	1.04622	0.916511	0.124725	0.958876	0.0778634	0.601972	0.941922	T	653	___2	PYGKRAPSPGAYKTATPPGYKPGSPPSFRTG	P54259	P54259	ATN1	Atrophin-1
1956	psites	tmt	0	0.985543	1.02157	0.15945	1.0068	0.149131	0.909038	0.989979	T	422	___2	TPFGPLSSRSAPASPTHPGLMSPRSGGLQTP	P85037	P85037	FOXK1	Forkhead box protein K1
1957	psites	tmt	0	0.966365	1.2537	0.0630234	1.21153	0.013138	0.541209	0.936012	T	2328	___2	VSASTQSTPASSRAQTLPTSVVTITSESSPG	Q01082	Q01082	SPTBN1	Spectrin beta chain, non-erythrocytic 1
1958	psites	tmt	0	0.940937	1.01023	0.0776699	0.950563	0.0723844	0.304964	0.858718	T	34	___2	ATMATPLPGRAGGPATPLSPTRLSRLQEKEE	Q03252	Q03252	LMNB2	Lamin-B2
1959	psites	tmt	0	0.924073	1.00126	0.212522	0.92524	0.26131	0.757834	0.98551	T	259	___2	DILAVRPPQIKSLPATPQGKNMTPESEVLES	Q13111	Q13111	CHAF1A	Chromatin assembly factor 1 subunit A
1960	psites	tmt	0	1.31993	0.74382	0.455402	0.981791	0.0895264	0.43362	0.897566	T	488	___2	DFRSIDDEITEAKSGTATPQRSGSVSNYRSC	Q13131	Q13131	PRKAA1	5'-AMP-activated protein kinase catalytic subunit alpha-1
1961	psites	tmt	0	0.993848	1.05874	0.0623507	1.05223	0.0519576	0.909207	0.989979	T	490	___2	RSIDDEITEAKSGTATPQRSGSVSNYRSCQR	Q13131	Q13131	PRKAA1	5'-AMP-activated protein kinase catalytic subunit alpha-1
1962	psites	tmt	0	0.99726	1.03132	0.0215281	1.02849	0.0588345	0.906508	0.989979	T	358	___2	TPSRSRSRDRFRRSETPPHWRQEMQRAQRMR	Q13427	Q13427	PPIG	Peptidyl-prolyl cis-trans isomerase G
1963	psites	tmt	0	0.868997	1.22983	0.137648	1.06872	0.160893	0.223686	0.835963	T	37	___2	VLGDGVQLPPGDYSTTPGGTLFSTTPGGTRI	Q13541	Q13541	EIF4EBP1	Eukaryotic translation initiation factor 4E-binding protein 1
1964	psites	tmt	0	0.900932	1.15248	0.123687	1.0383	0.160339	0.313608	0.858718	T	46	___2	PGDYSTTPGGTLFSTTPGGTRIIYDRKFLME	Q13541	Q13541	EIF4EBP1	Eukaryotic translation initiation factor 4E-binding protein 1
1965	psites	tmt	0	0.795661	1.13751	0.281133	0.905072	0.465528	0.368653	0.876797	T	37	___2	VAISDAAQLPHDYCTTPGGTLFSTTPGGTRI	Q13542	Q13542	EIF4EBP2	Eukaryotic translation initiation factor 4E-binding protein 2
1966	psites	tmt	0	0.980408	0.914546	0.211077	0.896628	0.233033	0.929885	0.992912	T	1058	___2	PRKDLSLGLDDSRTNTPQGVLPSSQLKSQGS	Q14004	Q14004	CDK13	Cyclin-dependent kinase 13
1967	psites	tmt	0	1.33733	0.84814	0.142713	1.13424	0.211712	0.257887	0.855001	T	1342	___2	VPTSHPPEDAPAQPPTPGPAASPEQLSFRER	Q14160	Q14160	SCRIB	Protein scribble homolog
1968	psites	tmt	0	0.911045	1.0566	0.229955	0.962608	0.116589	0.695074	0.9695	T	127	___2	SYTTPSKGSQKRAISTPETPLTKRSVSTRSP	Q14181	Q14181	POLA2	DNA polymerase alpha subunit B
1969	psites	tmt	0	0.911045	1.0566	0.229955	0.962608	0.116589	0.695074	0.9695	T	130	___2	TPSKGSQKRAISTPETPLTKRSVSTRSPHQL	Q14181	Q14181	POLA2	DNA polymerase alpha subunit B
1970	psites	tmt	0	1.12813	0.998117	0.0739986	1.126	0.0730805	0.0638352	0.834648	T	401	___2	EARRKLEEQARAKTQTPPVSPAPQPTEERLP	Q14247	Q14247	CTTN	Src substrate cortactin
1971	psites	tmt	0	1.1976	0.84243	0.101373	1.0089	0.128152	0.141182	0.834648	T	378	___2	APGLAHLQESQAGSDTDVEEGKAPQAVPLEK	Q14676	Q14676	MDC1	Mediator of DNA damage checkpoint protein 1
1972	psites	tmt	0	0.840882	1.09296	0.0486235	0.919053	0.228275	0.215309	0.834648	T	404	___2	VPLEKSQASMVINSDTDDEEEVSAALTLAHL	Q14676	Q14676	MDC1	Mediator of DNA damage checkpoint protein 1
1973	psites	tmt	0	0.79195	1.31608	0.00220219	1.04227	0.0429933	0.0165539	0.794218	T	267	___2	SYYNINQVTLGRRSITSPPSTSTTKRPKSID	Q14938	Q14938	NFIX	Nuclear factor 1 X-type
1974	psites	tmt	0	1.01234	1.20763	0.123499	1.22253	0.0797032	0.840996	0.986664	T	607	___2	AKEAETPQAKKIKLQTPNTFPKRKKGEKRAS	Q14978	Q14978	NOLC1	Nucleolar and coiled-body phosphoprotein 1
1975	psites	tmt	0	1.01234	1.20763	0.123499	1.22253	0.0797032	0.840996	0.986664	T	610	___2	AETPQAKKIKLQTPNTFPKRKKGEKRASSPF	Q14978	Q14978	NOLC1	Nucleolar and coiled-body phosphoprotein 1
1976	psites	tmt	0	1.05684	1.05519	0.135961	1.11517	0.0989807	0.513197	0.925947	T	27	___2	PSEHRRVEHGSGLTRTPSSEEISPTKFPGLY	Q15311	Q15311	RALBP1	RalA-binding protein 1
1977	psites	tmt	0	1.14845	1.06669	0.272759	1.22505	0.159452	0.572524	0.936012	T	639	___2	SGLSVSSEGPSQRLGTPKSVNKAVSQSRNEM	Q15398	Q15398	DLGAP5	Disks large-associated protein 5
1978	psites	tmt	0	1.03657	1.01533	0.068076	1.05245	0.00650992	0.523793	0.930181	T	1057	___2	SPGSAGRSQTPPGVATPPIPKITIQIPKGTV	Q15648	Q15648	MED1	Mediator of RNA polymerase II transcription subunit 1
1979	psites	tmt	0	0.950324	0.802894	0.0140656	0.763009	0.132249	0.61704	0.948	T	43	___2	QGSMANSTAVVKIPGTPGAGGRLSPENNQVL	Q16514	Q16514	TAF12	Transcription initiation factor TFIID subunit 12
1980	psites	tmt	0	0.950662	1.07222	0.021258	1.01932	0.136496	0.521902	0.930181	T	25	___2	GGVPEQEDSVLFRRGTGQSDDSDIWDDTALI	Q16637	Q16637	SMN1	Survival motor neuron protein
1981	psites	tmt	0	1.08981	0.942273	0.0794223	1.0269	0.0497579	0.111763	0.834648	T	620	___2	TTPPPAVQGQKVGSLTPPSSPKTQRAGHRRI	Q2M2I8	Q2M2I8	AAK1	AP2-associated protein kinase 1
1982	psites	tmt	0	0.926124	1.08649	0.129545	1.00622	0.142046	0.626682	0.948	T	599	___2	RRADDFPVRDDPSDVTDEDEGPAEPPPPPKL	Q3YEC7	Q3YEC7	RABL6	Rab-like protein 6
1983	psites	tmt	0	1.40894	0.843162	0.242526	1.18797	0.0651279	0.184843	0.834648	T	338	___2	EASEASKENRDIEISTEEEKDTGDLKDSSLL	Q4G0J3	Q4G0J3	LARP7	La-related protein 7
1984	psites	tmt	0	0.757521	1.00826	0.121803	0.763778	0.0476427	0.0975731	0.834648	T	263	___2	QRNSKTNQSKKKGPRTPSPPPPIPEDIALGK	Q5T200	Q5T200	ZC3H13	Zinc finger CCCH domain-containing protein 13
1985	psites	tmt	0	0.934498	1.02144	0.0738785	0.954532	0.0621152	0.214211	0.834648	T	258	___2	MPTSASQAKASAPERTPSPAPKRKKRAKSCS	Q63ZY6	Q63ZY6	NSUN5P2	Putative methyltransferase NSUN5C
1986	psites	tmt	0	0.890665	0.939593	0.0961084	0.836862	0.210439	0.527977	0.930181	T	331	___2	EAKPRKTLKEKKERRTPSDDEEDNLFAPPKL	Q641Q2;Q9Y4E1	Q641Q2	FAM21A;FAM21C	WASH complex subunit FAM21A;WASH complex subunit FAM21C
1987	psites	tmt	0	0.927029	1.03133	0.0946948	0.956076	0.216737	0.543583	0.936012	T	638	___2	ALELPLAASSIPRPRTPSPESHRSPAEGSER	Q66K74	Q66K74	MAP1S	Microtubule-associated protein 1S;MAP1S heavy chain;MAP1S light chain
1988	psites	tmt	0	1.13872	1.09424	0.133475	1.24604	0.291716	0.57909	0.936474	T	277	___2	EKKKGSHKRSASWGSTDQLKEIAKLRQQLQR	Q6P1L5	Q6P1L5	FAM117B	Protein FAM117B
1989	psites	tmt	0	1.70932	0.982046	0.225644	1.67863	0.230391	0.145337	0.834648	T	769	___2	LFGAPEPSTIARSLPTTVPESPNYRNTRTPR	Q6PKG0	Q6PKG0	LARP1	La-related protein 1
1990	psites	tmt	0	1.00239	1.19042	0.0863771	1.19327	0.127636	0.991937	1	T	785	___2	TVPESPNYRNTRTPRTPRTPQLKDSSQTSRF	Q6PKG0	Q6PKG0	LARP1	La-related protein 1
1991	psites	tmt	0	1.00239	1.19042	0.0863771	1.19327	0.127636	0.991937	1	T	788	___2	ESPNYRNTRTPRTPRTPQLKDSSQTSRFYPV	Q6PKG0	Q6PKG0	LARP1	La-related protein 1
1992	psites	tmt	0	0.947031	0.982354	0.087542	0.93032	0.086314	0.595963	0.941922	T	469	___2	LQLSTEPRGPGSPPRTPPAPGPPSFEEQLRL	Q6ZTN6	Q6ZTN6	ANKRD13D	Ankyrin repeat domain-containing protein 13D
1993	psites	tmt	0	1.15756	0.994013	0.257852	1.15063	0.0604702	0.481554	0.90494	T	888	___2	FGTDDRFRMDSRFLETDSEEEQEEVNEKKTA	Q76FK4	Q76FK4	NOL8	Nucleolar protein 8
1994	psites	tmt	0	1.08189	0.903817	0.0480106	0.977834	0.170197	0.481361	0.90494	T	213	___2	NSLLDEEVSRTLNAETPKSSPLPAKGRDPVE	Q7L2J0	Q7L2J0	MEPCE	7SK snRNA methylphosphate capping enzyme
1995	psites	tmt	0	0.790786	1.1972	0.0179985	0.946731	0.295239	0.349753	0.874972	T	479	___2	KPALKTQTPQLHFLDTDDEVSPTSWGDSRQA	Q86US8	Q86US8	SMG6	Telomerase-binding protein EST1A
1996	psites	tmt	0	0.772294	1.18637	0.13888	0.91623	0.116409	0.183565	0.834648	T	28	___2	GVEKNWGAVVRSPEGTPQKIRQLIDEGIAPE	Q86WB0	Q86WB0	ZC3HC1	Nuclear-interacting partner of ALK
1997	psites	tmt	0	1.01909	1.10269	0.0774868	1.12373	0.266875	0.992638	1	T	231	___2	GDELSSSSTEQIRATTPPNQGRPDSPVYANL	Q8IWW6	Q8IWW6	ARHGAP12	Rho GTPase-activating protein 12
1998	psites	tmt	0	0.976651	0.991037	0.0222763	0.967898	0.0230561	0.191741	0.834648	T	406	___2	SASPPRRRHRPSPPATPPPKTRHSPTPQQSN	Q8IYB3	Q8IYB3	SRRM1	Serine/arginine repetitive matrix protein 1
[truncated: 18,925 more rows]
